# Supplementary material for: Global N6-Methyladenosine Profiling Revealed the Tissue-Specific Epitranscriptomic Regulation of Rice Responses to Salt Stress
Source: MDPI journal article supplement (doi:10.3390/ijms23042091), 2022-02-14
Supplement: s1 [file s1]

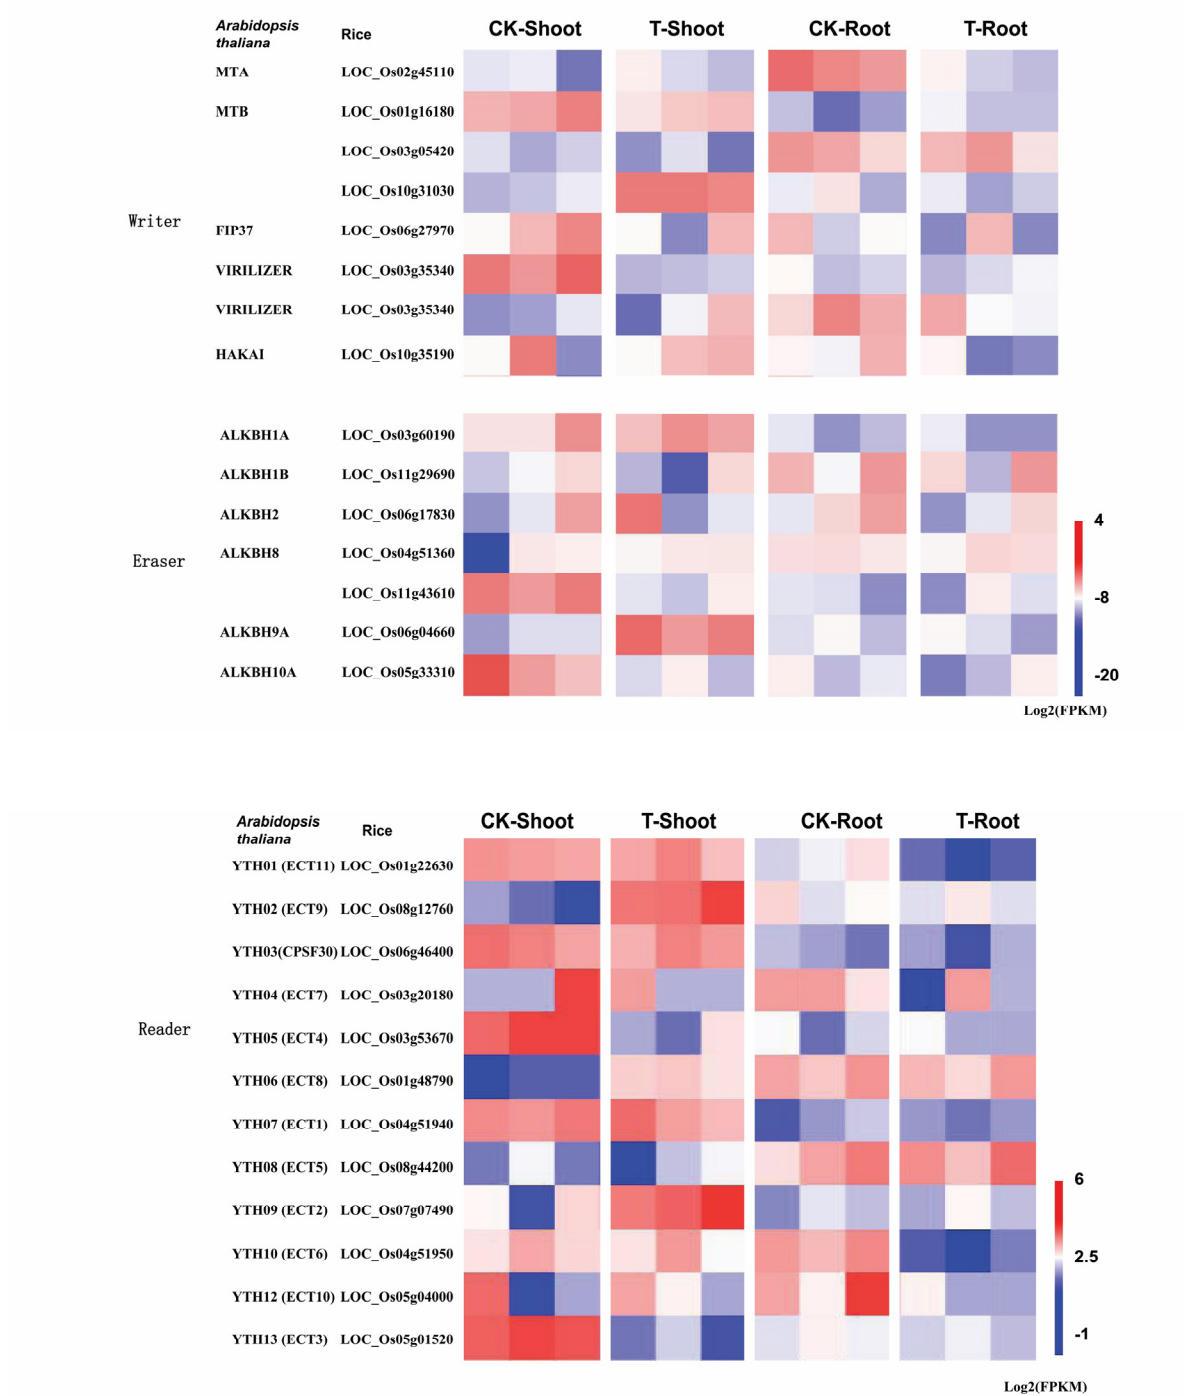

**Figure S1.** The expression profiling of the main component of m6A methylation in shoots and roots of FL478 under salt stress.
