# Supplementary material for: Global N6-Methyladenosine Profiling Revealed the Tissue-Specific Epitranscriptomic Regulation of Rice Responses to Salt Stress
Source: Int J Mol Sci. 2022 Feb 14;23(4):2091. doi: 10.3390/ijms23042091 (PMC8875919; doi:10.3390/ijms23042091)
Supplement: Supplementary file 1 [file ijms-23-02091-s001.zip]

Archive with 12 entries (12 files):
- Figure S1.pdf
- Table S10_ List of the genes with function of phytohormone reponse identified to be increased m6A methylation in shoots or roots under salt stress.xlsx
- Table S11_ List of the differentially expressed genes with increased or decreased m6A methylation in shoots and roots of FL478 under salt stress conditions.xlsx
- Table S1_Statistics of meRIP-seq data.xlsx
- Table S2_List of the genes with down-regulated m6A methylation in shoots under salt stress.xlsx
- Table S3_List of genes with up-regulated m6A methylation in roots under salt stress.xlsx
- Table S4_List of the genes with down-regulated m6A methylation in roots under salt stress.xlsx
- Table S5_List of the genes with up-regulated m6A methylation in shoots under salt stress.xlsx
- Table S6_List of genes with increased m6A in roots and decressed m6A in shoots of FL478 under salt stress.xlsx
- Table S7_List of the 19 genes with increased m6A in shoots and decreased m6A in roots of FL478 under salt stress conditions.xlsx
- Table S8_GO enrichment analysis of the genes with exclusive increase or decrease m6A methylation in shoots or roots under salt stress condition.xlsx
- Table S9_List of genes with function of transcription and redox  regulation identified to be increased m6A methylation in shoots and roots under salt stress.xlsx
