# Supplementary material for: Global N6-Methyladenosine Profiling Revealed the Tissue-Specific Epitranscriptomic Regulation of Rice Responses to Salt Stress
Source: Int J Mol Sci. 2022 Feb 14;23(4):2091. doi: 10.3390/ijms23042091 (PMC8875919; doi:10.3390/ijms23042091)
Supplement: Supplementary file 1 [file ijms-23-02091-s001.zip › Table S1_Statistics of meRIP-seq data.xlsx]

## Sheet: Table S1
Table S1 Statistics of sequencing reads
Sample	Raw Reads	Clean Reads	Clean Ratio
CK-Shoot-1.Input	49331604	49324672	0.999859
CK-Shoot-2.Input	54666244	54633908	0.999408
CK-Shoot-3.Input	56305358	56297364	0.999858
T-Shoot-1.Input	55184650	55179102	0.999899
T-Shoot-2.Input	47063920	47058232	0.999879
T-Shoot-3.Input	42632016	42627150	0.999886
CK-Root-1.Input	48896774	48891132	0.999885
CK-Root-2.Input	60006118	60000260	0.999902
CK-Root-3.Input	51570360	51566246	0.99992
T-Root-1.Input	44630696	44624058	0.999851
T-Root-2.Input	36750050	36745714	0.999882
T-Root-3.Input	46217462	46212490	0.999892
CK-Shoot-1.IP	49654828	49508568	0.997054
CK-Shoot-2.IP	59414618	59158358	0.995687
CK-Shoot-3.IP	51240658	51073772	0.996743
T-Shoot-1.IP	54765026	54118796	0.9882
T-Shoot-2.IP	52683878	52190412	0.990633
T-Shoot-3.IP	42394660	42245580	0.996484
CK-Root-1.IP	43983220	43693830	0.99342
CK-Root-2.IP	57559852	57266006	0.994895
CK-Root-3.IP	54386848	54095540	0.994644
T-Root-1.IP	55499092	55126590	0.993288
T-Root-2.IP	49815876	49580288	0.995271
T-Root-3.IP	51967692	51756670	0.995939
