# Supplementary material for: Global N6-Methyladenosine Profiling Revealed the Tissue-Specific Epitranscriptomic Regulation of Rice Responses to Salt Stress
Source: Int J Mol Sci. 2022 Feb 14;23(4):2091. doi: 10.3390/ijms23042091 (PMC8875919; doi:10.3390/ijms23042091)
Supplement: Supplementary file 1 [file ijms-23-02091-s001.zip › Table S2_List of the genes with down-regulated m6A methylation in shoots under salt stress.xlsx]

## Sheet: Table Sx
Table S2_List of the genes with down-regulated m6A methylation in shoots under salt stress
GeneName	Foldchange	P_value	FDR	Regulation	description
Os09g0417800	2.80168	7.63485e-06	0.000330562	down	Splicing variant of OsWRKY62 Pathogen defense
Os02g0202300	2.45476	8.83853e-06	0.000373796	down	Protein of unknown function DUF3414 domain containing protein.
Os03g0667100	2.83929	1.66257e-10	7.61932e-08	down	BTB/POZ domain containing protein expressed.
Os06g0478600	2.4801	2.514e-07	2.23909e-05	down	Leucine-rich repeat N-terminal domain containing protein.
Os03g0129800	2.2642	1.48477e-07	1.50539e-05	down	Putataive InsB from Escherichia coli.
Os11g0687200	73.6	4.63599e-06	0.000218026	down	Hypothetical conserved gene.
Os11g0244600	5.8618	4.11876e-10	1.27645e-07	down	Epsin-like N-terminal domain containing protein.
Os12g0632000	2.2016	5.17353e-08	6.66661e-06	down	Gly-rich protein Partner protein of RF5 Fertility restoration
Os04g0388700	2.68754	1.42429e-06	8.40556e-05	down	OSIGBa0096P03.3 protein.
Os10g0555651	4.53545	2.6108e-07	2.30877e-05	down	Conserved hypothetical protein.
Os03g0702800	2.0123	4.52159e-08	5.97587e-06	down	Eukaryotic peptide chain release factor subunit 1 (eRF1)
Os12g0511200	2.55208	7.39854e-07	5.05876e-05	down	Hly-III related domain containing protein.
Os12g0113001	2.89405	1.92394e-07	1.83368e-05	down	Conserved hypothetical protein.
Os07g0152800	2.45122	7.25105e-10	1.90651e-07	down	Glycine-rich protein.
Os02g0445700	2.43552	2.90806e-06	0.000148437	down	Conserved hypothetical protein.
Os04g0340300	4.09815	4.49562e-08	5.94713e-06	down	Terpenoid synthase domain containing protein.
Os05g0493400	7.743	2.56374e-06	0.000134121	down	Cyclin box (Fragment).
Os02g0749450	3.17537	2.13376e-07	1.97662e-05	down	dolichol-phosphate mannosyltransferase-related.
Os12g0622200	2.41538	9.36763e-11	5.90423e-08	down	Conserved hypothetical protein.
Os06g0592950	2.91648	3.49915e-09	7.1057e-07	down	Hypothetical gene.
Os10g0544600	8.3913	5.14211e-06	0.00023747	down	Zinc finger RING/FYVE/PHD-type domain containing protein.
Os07g0452600	4.7247	9.4468e-06	0.000395146	down	Hypothetical conserved gene.
Os06g0549300	2.4394	3.06842e-06	0.000154716	down	reticuline oxidase.
Os01g0117000	2.45528	4.67694e-06	0.000219731	down	Receptor-like kinase ARK1AS.
Os12g0238100	2.05263	1.01587e-07	1.12875e-05	down	Exocyst complex component 5.
Os05g0515400	2.31182	6.06078e-08	7.54546e-06	down	Auxin response factor 14.
Os05g0430900	2.99081	1.80356e-08	2.83152e-06	down	TGF-beta receptor type I/II extracellular region family protein.
Os06g0121650	4.4375	1.72301e-06	9.75326e-05	down	Conserved hypothetical protein.
Os07g0163500	2.227	9.68312e-08	1.08665e-05	down	Val-tRNA synthetase Regulation of chloroplast ribosome biogenesis Early chloroplast development
Os10g0184200	14.8475	3.1237e-11	4.28807e-08	down	Protein of unknown function DUF594 family protein.
Os04g0642100	3.63249	7.52508e-08	8.98229e-06	down	Microtubule-associated protein EB1.
Os08g0471800	2.15095	2.403e-06	0.000127602	down	Remorin C-terminal region domain containing protein.
Os06g0688100	2.25908	3.61877e-11	4.43619e-08	down	Hypothetical conserved gene.
Os06g0285400	3.03248	1.55259e-07	1.55365e-05	down	predicted protein.
Os12g0559200	11.1392	1.16765e-08	1.97626e-06	down	Lipoxygenase.
Os01g0882800	60	3.11824e-06	0.000156819	down	Amino acid carrier (Fragment).
Os03g0140100	2.00814	1.67e-08	2.66336e-06	down	Cytochrome P450 family protein.
Os10g0479500	6.6828	2.07337e-07	1.93638e-05	down	carboxy-lyase.
Os03g0848100	3.51404	2.72394e-09	5.70125e-07	down	Ser/Thr protein phosphatase family protein expressed.
Os06g0168150	2.07382	2.29916e-06	0.000123093	down	Hypothetical gene.
Os03g0721900	3.03018	2.37068e-07	2.13983e-05	down	Histone H2A.
Os01g0508500	2.01841	3.28467e-08	4.63527e-06	down	Conserved hypothetical protein.
Os06g0214800	4.55388	5.51655e-07	4.05554e-05	down	Alpha/beta hydrolase fold-3 domain containing protein.
Os07g0565500	3.72769	8.67352e-10	2.20908e-07	down	Conserved hypothetical protein.
Os10g0520900	3.30477	1.93484e-10	8.43331e-08	down	Hypothetical conserved gene.
Os03g0635800	2.07688	7.21554e-07	4.97387e-05	down	Protein of unknown function DUF828 plant family protein.
Os08g0562300	2.58304	3.46471e-07	2.85349e-05	down	Zinc finger C2H2-type domain containing protein.
Os02g0121750	9.22468	1.80048e-08	2.82773e-06	down	Hypothetical protein.
Os05g0349000	4.82131	7.87169e-06	0.000339184	down	Hypothetical protein.
Os06g0263450	4.17178	2.13834e-07	1.97957e-05	down	Hypothetical protein.
Os09g0446200	2.93601	4.52072e-06	0.000213206	down	Gamma tubulin complex protein 3 domain containing protein.
Os03g0323800	2.05907	8.85677e-07	5.80731e-05	down	ISP42-like protein (Fragment).
Os11g0503900	3.13565	4.28416e-07	3.34003e-05	down	Sulfotransferase family protein.
Os03g0843900	2.25681	2.25385e-07	2.05856e-05	down	Glycohydrolase family protein expressed.
Os09g0421300	3.78782	7.85351e-08	9.3003e-06	down	Phospholipase D lambda.
Os02g0745100	3.02111	2.89769e-06	0.000147943	down	Aquaporin NIP III subfamily protein Aquaporin Silicon influx transporter Arsenic species (As) uptake Arsenite efflux Selenite (Se) uptake Water transport
Os02g0719600	3.73707	1.36582e-07	1.40876e-05	down	SAM dependent carboxyl methyltransferase family protein.
Os03g0796000	11.3984	2.95623e-07	2.5306e-05	down	Ripening-associated protein (Fragment).
Os10g0483500	2.03953	5.12513e-07	3.83854e-05	down	FAD linked oxidase N-terminal domain containing protein.
Os11g0707800	2.48732	4.89715e-12	3.23806e-08	down	Uncoupling protein.
Os05g0569000	2.14662	1.11319e-06	6.93449e-05	down	Hypothetical conserved gene.
Os04g0119200	2.50041	6.89586e-08	8.35627e-06	down	HAT family dimerisation domain containing protein expressed.
Os02g0121700	4.14579	6.81183e-06	0.000299841	down	Terpenoid synthase domain containing protein.
Os01g0916100	7.28261	1.59402e-07	1.58835e-05	down	loricrin.
Os05g0102600	3.17077	6.58504e-06	0.000291283	down	Zinc finger RING/FYVE/PHD-type domain containing protein.
Os06g0697600	2.05813	3.22729e-07	2.70298e-05	down	ATPase AAA-type core domain containing protein.
Os02g0219200	2.75319	2.67822e-12	2.46158e-08	down	Beta-galactosidase.
Os05g0150733	2.41977	7.00415e-06	0.000307028	down	pro-resilin.
Os01g0179800	2.44945	6.92999e-11	5.70253e-08	down	TMS membrane protein/tumour differentially expressed protein family protein.
Os11g0217300	2.03921	2.49974e-06	0.000131631	down	Mevalonate and galactokinase family protein.
Os02g0647300	2.10756	3.08064e-06	0.000155222	down	Leucine-rich repeat plant specific containing protein.
Os09g0467400	2.99257	6.17768e-06	0.000276534	down	Protein of unknown function DUF6 transmembrane domain containing protein.
Os06g0567200	2.758	5.08086e-09	9.7069e-07	down	Cupredoxin domain containing protein.
Os05g0475700	2.31949	1.06358e-10	6.28909e-08	down	nodulin-like protein.
Os11g0687100	3.42688	9.46402e-07	6.1205e-05	down	von Willebrand factor type A domain containing protein.
Os03g0130100	2.49631	1.99302e-11	4.17983e-08	down	Acyl-activating enzyme 11.
Os07g0148200	2.34527	5.26266e-08	6.75676e-06	down	Flavonol 3-O-glucosyltransferase (EC 2.4.1.91) (UDP-glucose flavonoid 3-O-glucosyltransferase) (Bronze-1) (Bz-McC allele).
Os01g0756900	4.03102	6.392e-10	1.73904e-07	down	Hypothetical protein.
Os06g0263450	82.9	8.88228e-07	5.82043e-05	down	Hypothetical protein.
Os02g0681900	2.78196	1.24998e-07	1.31725e-05	down	GRAS transcription factor domain containing protein.
Os01g0383700	2.05448	3.6672e-11	4.44257e-08	down	LEC14B protein.
Os04g0553800	2.15542	1.22422e-06	7.47633e-05	down	OSIGBa0143N19.10 protein.
Os01g0935300	6.20221	2.0186e-06	0.000110996	down	Cullin family protein.
Os08g0538800	2.10908	9.1961e-08	1.04798e-05	down	Pentatricopeptide repeat domain containing protein.
Os01g0704200	2.01465	7.0729e-09	1.28839e-06	down	predicted protein.
Os11g0197400	3.23232	2.22786e-06	0.000119924	down	Protein of unknown function DUF803 domain containing protein.
Os02g0270100	2.98084	2.72194e-08	3.98204e-06	down	Hypothetical gene.
Os03g0130100	2.2687	2.72561e-09	5.70194e-07	down	Acyl-activating enzyme 11.
Os09g0528700	2.13108	2.23603e-09	4.82326e-07	down	Cytochrome p450 (CYP78A9).
Os03g0375966	2.58487	6.73297e-06	0.000296864	down	Amino acid permease family protein.
Os12g0559934	7.48938	7.03458e-09	1.28307e-06	down	Lipoxygenase.
Os11g0685400	2.17503	8.78441e-09	1.55591e-06	down	Hypothetical conserved gene.
Os10g0116000	2.2155	5.10232e-06	0.000235941	down	Pentatricopeptide repeat domain containing protein.
Os03g0637800	2.00293	3.70577e-08	5.08358e-06	down	Crinkly4 receptor-like kinase Epidermal cell differentiation Interlocking of the palea and lemma
Os01g0806300	2.06991	3.43963e-11	4.39958e-08	down	Conserved hypothetical protein.
Os01g0899500	3.62437	4.15998e-07	3.26975e-05	down	FMN-binding split barrel-related domain containing protein.
Os11g0587300	2.07484	5.12217e-06	0.000236678	down	Conserved hypothetical protein.
Os04g0415401	2.51315	7.10975e-12	3.80154e-08	down	Conserved hypothetical protein.
Os03g0168700	2.44933	2.07126e-06	0.000113272	down	SET domain containing protein.
Os05g0152201	2.18787	1.22695e-07	1.29816e-05	down	Conserved hypothetical protein.
Os07g0605400	2.49233	3.89793e-06	0.000188172	down	EGG APPARATUS-1 protein (ZmEA1).
Os01g0364800	3.808	7.33459e-06	0.000319361	down	Protein kinase catalytic domain domain containing protein.
Os01g0808100	2.15091	2.67183e-07	2.3502e-05	down	BZIP transcription factor.
Os04g0505200	2.24358	3.83207e-11	4.51299e-08	down	Protein binding protein.
Os05g0472700	3.9089	3.25989e-07	2.72435e-05	down	Metal transport protein.
Os06g0610100	2.79419	7.99555e-06	0.000343785	down	Hypothetical conserved gene.
Os02g0448400	8.17416	2.56064e-07	2.27106e-05	down	Synaptotagmin C.
Os03g0396900	2.62204	5.09221e-06	0.000235551	down	PIMT.
Os07g0154400	5.54982	1.87824e-08	2.92811e-06	down	Armadillo-type fold domain containing protein.
Os10g0518300	2.32256	5.66581e-06	0.000257741	down	Tetratricopeptide-like helical domain containing protein.
Os04g0549350	2.23592	1.57492e-06	9.07621e-05	down	Hypothetical protein.
Os01g0908200	2.03788	7.61552e-07	5.17314e-05	down	Member of the Bric-a-Brac/Tramtrack/Broad (BTB) family BT1/BT2 ortholog Negative regulation of nitrate uptake and nitrogen use efficiency
Os06g0278000	2.00006	3.37414e-07	2.79803e-05	down	Glucoamylase putatuve domain containing protein.
Os12g0566000	2.92198	1.68964e-06	9.60679e-05	down	Boron transporter.
Os04g0388700	2.10391	2.21618e-08	3.36438e-06	down	OSIGBa0096P03.3 protein.
Os11g0679700	2.52947	1.33682e-08	2.21125e-06	down	Glycerol-3-phosphate acyltransferase Anther development Pollen formation
Os07g0619600	2.09464	9.38457e-12	4.17983e-08	down	Homeobox domain containing protein.
Os11g0291500	2.45459	9.83863e-12	4.17983e-08	down	Beta-D-xylosidase.
Os04g0151700	2.57646	4.48082e-06	0.000211646	down	Hypothetical conserved gene.
Os01g0823100	2.47377	8.37812e-12	4.16728e-08	down	Alpha-expansin OsEXPA2.
Os05g0516100	2.0999	9.68127e-08	1.08665e-05	down	Conserved hypothetical protein.
Os12g0559200	10.5993	3.93019e-09	7.79143e-07	down	Lipoxygenase.
Os04g0269900	2.27862	2.51173e-11	4.28807e-08	down	Conserved hypothetical protein.
Os06g0624750	2.36047	3.08879e-08	4.41932e-06	down	Hypothetical protein.
Os08g0483200	2.03547	4.65897e-10	1.39601e-07	down	Nucleotide-binding alpha-beta plait domain containing protein.
Os01g0942200	10.2672	1.03462e-06	6.5484e-05	down	Cyclin-like F-box domain containing protein.
Os05g0503100	2.34489	2.15212e-08	3.2789e-06	down	Hypothetical conserved gene.
Os03g0368900	2.98729	6.64733e-07	4.67936e-05	down	Haem peroxidase family protein.
Os04g0414800	2.23353	6.44991e-08	7.9157e-06	down	Pentatricopeptide repeat domain containing protein.
Os04g0581100	2.72003	5.30402e-07	3.93971e-05	down	2OG-Fe(II) oxygenase domain containing protein.
Os01g0937900	2.00206	7.2132e-07	4.97338e-05	down	Conserved hypothetical protein.
Os09g0482900	3.98359	1.41867e-06	8.38176e-05	down	UDP-glucuronosyl/UDP-glucosyltransferase family protein.
Os07g0142200	4.02976	2.05114e-06	0.000112365	down	Conserved hypothetical protein.
Os03g0215200	2.98042	5.02826e-08	6.52717e-06	down	Putative transcription factor Carpel specification Midrib formation
Os03g0647600	2.02011	2.15316e-06	0.00011687	down	Nf-Y-A subunit.
Os04g0340300	95.5	1.65369e-07	1.63043e-05	down	Terpenoid synthase domain containing protein.
Os12g0264800	3.65586	1.72131e-11	4.17983e-08	down	Conserved hypothetical protein.
Os03g0725000	2.82747	1.44444e-06	8.49605e-05	down	Mitochondrial 60S ribosomal protein L6.
Os09g0241550	27.3902	7.95855e-08	9.38838e-06	down	F-box domain containing protein expressed.
Os04g0137201	2.04461	3.02799e-10	1.07953e-07	down	Non-protein coding transcript.
Os03g0226300	2.75422	2.73109e-07	2.38965e-05	down	Pto kinase interactor 1.
Os04g0463000	2.57708	4.36709e-07	3.39155e-05	down	Serine/threonine protein kinase domain containing protein.
Os08g0547350	3.23283	2.34646e-10	9.06043e-08	down	Hypothetical protein.
Os03g0197175	2.27845	5.88058e-08	7.3747e-06	down	Hypothetical gene.
Os05g0323100	2.23663	1.86956e-06	0.000104499	down	Rhodanese-like domain containing protein.
Os04g0625350	2.51031	1.17056e-08	1.9804e-06	down	OSIGBa0148A10.3 protein.
Os04g0383700	2.01519	3.70445e-09	7.43098e-07	down	Conserved hypothetical protein.
Os01g0681700	3.30842	8.67018e-07	5.71741e-05	down	Hypothetical conserved gene.
Os01g0677900	2.32652	1.29651e-08	2.15553e-06	down	Protein of unknown function DUF2921 domain containing protein.
Os02g0115700	2.77474	3.66671e-08	5.04473e-06	down	Catalase.
Os08g0537600	3.1736	1.43277e-06	8.44352e-05	down	Arf GTPase activating protein family protein.
Os09g0488600	85.4	1.22127e-08	2.05223e-06	down	Protein kinase PKN/PRK1 effector domain containing protein.
Os05g0477100	72.6	5.95686e-06	0.000268463	down	Hypothetical protein.
Os01g0108400	2.8288	2.13725e-07	1.97899e-05	down	Helix-loop-helix DNA-binding domain containing protein.
Os03g0694500	18.0236	1.34982e-09	3.16173e-07	down	Permease 1.
Os03g0333100	3.61891	2.70254e-07	2.37203e-05	down	Hypothetical conserved gene.
Os05g0477600	2.33347	3.96766e-11	4.57594e-08	down	Non-protein coding transcript.
Os08g0154950	2.6408	5.84271e-06	0.00026414	down	Hypothetical protein.
Os09g0498500	4.1164	9.16177e-08	1.04492e-05	down	NAD-binding site containing protein.
Os02g0648100	2.94018	4.85271e-09	9.33855e-07	down	Protein kinase core domain containing protein.
Os02g0769100	2.04427	9.72063e-07	6.24777e-05	down	Auxin responsive SAUR protein family protein.
Os03g0841900	2.05446	6.00048e-08	7.48582e-06	down	carotenoid isomerase 1.
Os01g0279500	4.4728	1.23894e-07	1.3092e-05	down	Hypothetical gene.
Os04g0505200	2.64014	1.91211e-07	1.82364e-05	down	Protein binding protein.
Os02g0658800	4.05092	8.49738e-06	0.000361939	down	Beta-expansin.
Os01g0337700	2.0296	1.11656e-07	1.21013e-05	down	Conserved hypothetical protein.
Os02g0207400	2.14888	2.02725e-09	4.45943e-07	down	UDP-glycosyltransferase UGT99C4.
Os12g0618600	2.44264	2.31118e-06	0.000123627	down	Transcriptional activator HAP2.
Os01g0793300	5.53291	6.29692e-10	1.72427e-07	down	Di-copper centre-containing domain containing protein.
Os01g0116100	2.13877	1.23467e-09	2.92706e-07	down	Conserved hypothetical protein.
Os02g0802200	2.02034	5.48211e-08	6.96867e-06	down	Glycoside hydrolase family 79 N-terminal protein.
Os11g0559533	3.11821	1.16875e-07	1.25161e-05	down	Hypothetical gene.
Os11g0539200	2.0136	1.95396e-07	1.85519e-05	down	Xyloglucan endotransglycosylase XET2 (Fragment).
Os12g0159000	2.29521	2.74444e-07	2.39984e-05	down	Harpin-induced 1 domain containing protein.
Os12g0167900	2.79379	2.47686e-06	0.000130784	down	Ribosomal protein L3A
Os07g0500300	2.49019	1.99946e-08	3.08522e-06	down	C2 calcium-dependent membrane targeting domain containing protein.
Os10g0515900	11.1024	1.99228e-08	3.07639e-06	down	Cytochrome P450 family protein.
Os03g0346800	2.085	2.82421e-08	4.09989e-06	down	metal tolerance protein.
Os04g0630500	2.06282	1.56339e-06	9.0258e-05	down	H0323C08.15 protein.
Os04g0650700	2.22584	1.4323e-06	8.44222e-05	down	OSIGBa0113E10.3 protein.
Os05g0253200	3.88911	7.65455e-06	0.000331211	down	Conserved hypothetical protein.
Os09g0448200	3.01957	1.31063e-06	7.88672e-05	down	High-affinity potassium transporter.
Os08g0545700	2.80954	7.68889e-09	1.38354e-06	down	TraB protein-related.
Os08g0434566	6.58082	1.23745e-13	1.04636e-08	down	Hypothetical gene.
Os01g0921100	2.40962	5.2592e-07	3.9133e-05	down	Hypothetical conserved gene.
Os08g0462300	4.60837	5.52609e-08	7.00983e-06	down	Cyclin-like F-box domain containing protein.
Os07g0692900	2.03419	4.27634e-12	3.23806e-08	down	Ubiquitin-activating enzyme E1.
Os05g0447200	3.10296	5.86532e-06	0.000264879	down	AUX1-like protein.
Os03g0643900	7.40394	1.49187e-06	8.69759e-05	down	Conserved hypothetical protein.
Os07g0628700	2.97293	6.21504e-09	1.14996e-06	down	Receptor protein kinase.
Os08g0293200	71.8	6.46407e-06	0.000287014	down	F-box domain cyclin-like domain containing protein.
Os04g0443900	3.15207	5.15217e-07	3.85192e-05	down	RuBisCO large subunit-binding protein subunit beta chloroplastic.
Os05g0322900	3.11362	1.08888e-07	1.18816e-05	down	WRKY transcription factor 45.
Os05g0201300	4.20708	4.1398e-07	3.25752e-05	down	Hypothetical gene.
Os04g0376500	2.63112	8.56413e-06	0.000364195	down	eukaryotic translation initiation factor 3 subunit 3.
Os04g0625600	3.55061	2.90375e-08	4.19288e-06	down	Kelch related domain containing protein.
Os09g0469400	2.13958	8.76765e-07	5.76317e-05	down	isoamylase-type starch debranching enzyme ISO3.
Os02g0625500	2.1028	9.43638e-08	1.0676e-05	down	Adenosine kinase-like protein (Fragment).
Os05g0566300	2.17004	3.32811e-07	2.76605e-05	down	PRC-barrel domain containing protein.
Os06g0572000	2.11846	4.34674e-08	5.79003e-06	down	Hypothetical protein.
Os06g0254600	9.75947	5.97937e-08	7.46829e-06	down	Caleosin related family protein.
Os04g0640700	2.44709	1.02743e-07	1.13803e-05	down	OSIGBa0138H21-OSIGBa0138E01.14 protein.
Os06g0208800	2.15883	4.04238e-06	0.000193807	down	Lysin motif-containing protein Pattern recognition receptor Peptidoglycan and chitin perception in innate immunity
Os06g0166500	3.3284	1.02894e-07	1.13881e-05	down	Auxin-responsive protein IAA20 (Indoleacetic acid-induced protein 20).
Os02g0116700	11.4205	3.31157e-06	0.000164931	down	Protein kinase core domain containing protein.
Os04g0636800	2.18111	4.36215e-09	8.51859e-07	down	Conserved hypothetical protein.
Os05g0464350	3.83905	1.28418e-06	7.75956e-05	down	Hypothetical protein.
Os08g0425000	2.68489	1.12426e-07	1.21629e-05	down	mRNA clone: RTFL01-05-M08.
Os06g0610800	3.26139	4.53062e-10	1.36626e-07	down	Aspartic proteinase nepenthesin-1.
Os10g0574400	2.60409	1.04908e-09	2.56531e-07	down	Zinc finger RING-type domain containing protein.
Os02g0198700	2.26214	6.80276e-07	4.76182e-05	down	Subtilisin-like protease.
Os08g0249900	2.99042	3.06147e-08	4.38765e-06	down	Gibberellin 20 oxidase 2.
Os03g0202300	2.56227	1.87536e-09	4.17526e-07	down	radical SAM domain-containing protein.
Os03g0832400	2.23622	1.44504e-06	8.49693e-05	down	Protein phosphatase 2C-like protein.
Os11g0265900	3.31025	1.64002e-07	1.61978e-05	down	NB-ARC domain containing protein.
Os09g0315800	2.29604	6.37483e-08	7.84634e-06	down	Phosphotransferase system HPr serine phosphorylation site domain containing protein.
Os05g0519500	2.25521	1.99928e-08	3.08522e-06	down	WD40/YVTN repeat-like domain containing protein.
Os02g0744700	2.22942	3.94584e-09	7.81022e-07	down	Soluble starch synthase 2-2 chloroplastic/amyloplastic.
Os02g0634700	2.27806	4.11049e-07	3.24264e-05	down	lysosomal protective protein.
Os08g0134900	2.92727	5.44646e-08	6.92543e-06	down	Conserved hypothetical protein.
Os03g0569900	2.10491	6.11834e-08	7.59921e-06	down	RNA recognition motif family protein expressed.
Os10g0522200	3.01884	1.44024e-06	8.47603e-05	down	Hypothetical protein.
Os04g0451200	2.50872	9.57043e-08	1.07843e-05	down	H0815C01.4 protein.
Os01g0358400	2.02257	1.20878e-08	2.03691e-06	down	40S ribosomal protein S4.
Os03g0277600	2.67647	2.15411e-09	4.67385e-07	down	(clone wusl1032) mRNA sequence.
Os03g0281100	6.43062	8.71873e-06	0.000369543	down	Ankyrin repeat containing protein.
Os07g0476401	8.1133	2.80471e-08	4.08194e-06	down	K-exchanger-like protein.
Os04g0258900	2.06617	7.48471e-08	8.94206e-06	down	Cyclin-like F-box domain containing protein.
Os03g0577100	3.60606	4.18942e-06	0.000199712	down	Nuf2 family protein.
Os03g0300100	2.04277	2.73144e-10	9.9554e-08	down	Hypothetical protein.
Os01g0835500	2.25416	2.08125e-06	0.000113716	down	Respiratory burst oxidase-like protein J.
Os09g0313600	2.77216	2.1807e-09	4.72325e-07	down	Disease resistance protein domain containing protein.
Os12g0176800	2.16305	4.12107e-06	0.000196875	down	Heterochromatin protein (Fragment).
Os09g0338500	2.10436	2.63929e-07	2.32763e-05	down	Desaturase/cytochrome b5 protein.
Os03g0127950	2.13581	7.33029e-11	5.70253e-08	down	inner membrane protein ybaL.
Os09g0519100	16.0645	1.73824e-08	2.74266e-06	down	Helix-loop-helix DNA-binding domain containing protein.
Os01g0668100	2.04959	7.33273e-07	5.02791e-05	down	Arabinogalactan-like protein.
Os07g0111700	2.02695	3.13516e-08	4.46151e-06	down	cDNA clone:J023132I08 full insert sequence.
Os10g0477600	2.15307	3.97417e-06	0.000191153	down	NAM / CUC2-like protein.
Os05g0532800	2.66438	1.657e-06	9.46325e-05	down	Conserved hypothetical protein.
Os01g0932950	4.62182	3.92963e-07	3.13414e-05	down	RALFL33.
Os06g0129600	2.77105	2.92976e-07	2.51201e-05	down	Alpha-L-fucosidase 2.
Os02g0468100	2.80845	1.00796e-08	1.74439e-06	down	Wax synthase isoform 1.
Os01g0329075	2.01344	7.54366e-07	5.13258e-05	down	Hypothetical protein.
Os04g0581100	3.65051	4.63094e-07	3.54887e-05	down	2OG-Fe(II) oxygenase domain containing protein.
Os04g0581100	3.74371	2.39824e-07	2.1588e-05	down	2OG-Fe(II) oxygenase domain containing protein.
Os05g0205100	3.73548	2.55085e-06	0.00013364	down	NLI interacting factor domain containing protein.
Os02g0564700	2.5266	8.37343e-06	0.000357488	down	BHLH transcription factor.
Os08g0190200	2.19158	3.17853e-08	4.5126e-06	down	cDNA clone:J033051E20 full insert sequence.
Os02g0787600	5.95556	4.30582e-12	3.23806e-08	down	Hypothetical conserved gene.
Os02g0675700	2.05424	4.75951e-07	3.62637e-05	down	Protein of unknown function DUF248 methyltransferase putative family protein.
Os04g0547800	4.30271	1.99098e-07	1.88043e-05	down	Conserved hypothetical protein.
Os03g0687000	2.02246	5.87926e-11	5.1067e-08	down	Nitrate transporter Acquisition and long-distance transport of nitrate
Os07g0628700	2.48373	5.24564e-10	1.50769e-07	down	Receptor protein kinase.
Os06g0561501	2.45099	3.20291e-10	1.11653e-07	down	Conserved hypothetical protein.
Os11g0138600	2.41114	4.32765e-07	3.36402e-05	down	Phosphoglycerate mutase family protein.
Os04g0554800	2.3143	1.15781e-09	2.78131e-07	down	RCc3 protein.
Os02g0627750	2.55548	1.06059e-06	6.67273e-05	down	Hypothetical protein.
Os02g0714600	2.12979	1.70905e-06	9.6937e-05	down	Ribose-phosphate pyrophosphokinase 4 (EC 2.7.6.1) (Phosphoribosyl pyrophosphate synthetase 4).
Os03g0165400	2.84492	1.15524e-06	7.14804e-05	down	Beta-galactosidase.
Os09g0471100	2.02045	5.71083e-09	1.07167e-06	down	Peroxidase 17 precursor (EC 1.11.1.7) (Atperox P17) (ATP25a).
Os07g0489200	2.70671	6.74821e-11	5.63849e-08	down	UDP-glucuronosyl/UDP-glucosyltransferase family protein.
Os09g0292350	26.3061	2.05639e-08	3.1535e-06	down	Hypothetical protein.
Os01g0868900	2.67997	1.12367e-08	1.91562e-06	down	predicted protein.
Os03g0650200	2.17393	1.47889e-06	8.64218e-05	down	Cytochrome P450 CYP92C5.
Os04g0613700	2.10996	9.8148e-06	0.000407743	down	Non-protein coding transcript.
Os01g0871500	3.55528	5.87657e-08	7.37257e-06	down	TGF-beta receptor type I/II extracellular region family protein.
Os08g0461100	8.73182	4.97797e-08	6.4778e-06	down	Hypothetical conserved gene.
Os02g0592500	87.5	4.5999e-07	3.52957e-05	down	Folate receptor conserved region domain containing protein.
Os03g0296500	5.35979	9.51686e-07	6.14577e-05	down	Glycosyl hydrolases family 17 protein expressed.
Os04g0373000	2.62623	4.30499e-07	3.35417e-05	down	OSIGBa0140A01.9 protein.
Os07g0172600	2.34441	2.56938e-08	3.78901e-06	down	Pentatricopeptide repeat domain containing protein.
Os04g0569400	2.16543	1.11611e-07	1.20995e-05	down	OSIGBa0139P06.9 protein.
Os06g0338900	2.07311	2.46244e-07	2.20384e-05	down	Bacterial transferase hexapeptide repeat domain containing protein.
Os07g0540500	2.52434	7.12293e-10	1.88455e-07	down	receptor-like protein kinase RK20-1.
Os11g0290600	3.38557	8.46217e-06	0.000360767	down	Conserved hypothetical protein.
Os05g0383100	16.1884	4.07327e-07	3.21895e-05	down	Clathrin adaptor mu subunit domain containing protein.
Os02g0122800	2.54633	1.95852e-09	4.33078e-07	down	Nucleotide-binding alpha-beta plait domain containing protein.
Os01g0854000	3.91526	5.53955e-08	7.02268e-06	down	AER.
Os09g0434100	2.04903	2.52668e-11	4.28807e-08	down	Conserved hypothetical protein.
Os04g0623200	3.1157	8.66714e-07	5.71666e-05	down	H0215F08.2 protein.
Os04g0469300	2.04986	9.44059e-06	0.000394971	down	ATFP4.
Os07g0571000	2.0209	8.67416e-08	1.0035e-05	down	Hypothetical gene.
Os09g0110500	2.32467	4.1912e-08	5.62004e-06	down	Hypothetical protein.
Os01g0677900	2.34258	9.30273e-08	1.05728e-05	down	Protein of unknown function DUF2921 domain containing protein.
Os07g0134200	2.47539	9.74201e-09	1.69708e-06	down	Receptor-like protein kinase 3.
Os02g0757700	3.98526	8.49503e-13	1.6732e-08	down	Ubiquitin-protein ligase.
Os04g0641700	7.05581	1.34455e-06	8.03458e-05	down	H0423H10.4 protein.
Os03g0725400	3.76814	2.41e-07	2.16608e-05	down	WD-repeat protein 5 (BMP2-induced 3-kb gene protein) (WD-repeat protein BIG-3).
Os03g0370600	2.90542	4.64244e-11	4.75249e-08	down	Hydrophobic protein LTI6A (Low temperature-induced protein 6A).
Os01g0977400	2.031	6.3474e-06	0.000282894	down	Pentatricopeptide repeat domain containing protein.
Os01g0215500	2.18234	2.12577e-07	1.97225e-05	down	esterase.
Os12g0123100	2.422	4.25029e-12	3.23806e-08	down	EMB2748.
Os03g0737200	2.26107	1.11248e-06	6.93109e-05	down	E3-ubiquitin ligase Modulation of the cold stress response
Os06g0497600	2.94412	9.8938e-13	1.6732e-08	down	H0321H01.8 protein.
Os01g0251400	2.5272	4.4972e-06	0.000212278	down	Conserved hypothetical protein.
Os08g0514100	10.6364	7.0354e-07	4.87942e-05	down	Legume lectin beta chain domain containing protein.
Os04g0518400	7.74203	2.55764e-08	3.77961e-06	down	Phenylalanine ammonia-lyase (Fragment).
Os10g0509700	15.7755	1.27965e-06	7.74549e-05	down	Hypothetical gene.
Os05g0574800	2.0621	2.30208e-08	3.46122e-06	down	Hypothetical conserved gene.
Os03g0665200	2.12288	1.8286e-08	2.86499e-06	down	Protein of unknown function DUF581 family protein.
Os10g0515900	19.1837	4.80372e-08	6.28587e-06	down	Cytochrome P450 family protein.
Os09g0417600	2.69044	1.75084e-10	7.9001e-08	down	Splicing variant of OsWRKY76 Pathogen defense
Os06g0609700	2.1498	1.92192e-08	2.98519e-06	down	Esterase/lipase/thioesterase domain containing protein.
Os08g0167800	15.1702	2.97718e-08	4.28282e-06	down	Sesquiterpene synthase.
Os06g0233200	2.4537	4.62251e-08	6.08994e-06	down	RING-H2 finger protein ATL1R (RING-H2 finger protein ATL8).
Os06g0163200	6.85401	2.59653e-08	3.82504e-06	down	Esterase/lipase/thioesterase domain containing protein.
Os11g0150801	2.66888	8.21167e-07	5.47345e-05	down	Hypothetical protein.
Os07g0403800	8.15646	7.48916e-06	0.000324819	down	ligA.
Os02g0116700	2.70552	1.10819e-06	6.90945e-05	down	Protein kinase core domain containing protein.
Os11g0171100	2.16036	2.49402e-06	0.000131379	down	Conserved hypothetical protein.
Os01g0972200	9.34014	4.60277e-07	3.53113e-05	down	Zinc transporter 2 precursor (ZRT/IRT-like protein 2).
Os08g0460000	3.34191	1.65559e-08	2.64338e-06	down	Germin-like protein 1 precursor.
Os05g0397300	2.72928	2.92142e-07	2.50685e-05	down	Hypothetical conserved gene.
Os12g0574900	4.47782	2.28212e-09	4.89775e-07	down	Asparagine synthase family protein.
Os01g0317500	3.20516	1.97131e-12	2.27001e-08	down	esterase/lipase/thioesterase family protein.
Os03g0778400	2.8305	1.33796e-06	8.00903e-05	down	predicted protein.
Os12g0569700	2.13873	1.75075e-06	9.87326e-05	down	Heat shock protein 70.
Os07g0554500	13.2386	4.17349e-07	3.27489e-05	down	OSIGBa0107A02.1 protein.
Os01g0546900	2.18669	7.17712e-06	0.000313792	down	transcription factor jumonji (jmjC) domain-containing protein.
Os09g0111100	2.1707	2.92196e-07	2.50685e-05	down	Cyclin D domain containing protein.
Os05g0579600	2.10339	7.07448e-07	4.9001e-05	down	Homeodomain-like containing protein.
Os03g0822000	2.29557	3.68348e-08	5.0563e-06	down	Expansin-A7.
Os01g0113900	10.6723	3.09613e-07	2.62127e-05	down	Receptor-like protein kinase.
Os10g0377300	2.09437	1.03976e-09	2.55018e-07	down	Homeobox-leucine zipper protein HOX8.
Os08g0471800	2.03555	6.1055e-07	4.39004e-05	down	Remorin C-terminal region domain containing protein.
Os05g0258400	7.11178	5.63269e-11	5.01249e-08	down	Protein kinase catalytic domain domain containing protein.
Os06g0341400	2.43659	3.70437e-06	0.00018058	down	Hypothetical protein.
Os04g0561500	4.09801	6.4294e-06	0.000285896	down	Prolyl endopeptidase (EC 3.4.21.26) (Post-proline cleaving enzyme) (PE).
Os06g0495800	3.09049	1.05004e-07	1.1543e-05	down	Protein of unknown function DUF617 plant family protein.
Os01g0739700	3.76762	7.79332e-06	0.000336356	down	Glycoside hydrolase family 17 protein.
Os01g0298301	3.21272	5.2726e-08	6.76167e-06	down	Hypothetical conserved gene.
Os08g0492000	2.11344	1.77363e-09	3.9781e-07	down	Glutathione transporter.
Os06g0128600	2.77396	8.22272e-09	1.46935e-06	down	Ankyrin repeat containing protein.
Os05g0501200	2.77261	2.49059e-06	0.000131302	down	Hypothetical conserved gene.
Os06g0120200	2.07585	2.73846e-11	4.28807e-08	down	Protein of unknown function DUF594 family protein.
Os04g0117600	2.1002	6.95911e-06	0.00030537	down	H0613H07.1 protein.
Os12g0559200	4.97855	3.37443e-08	4.72116e-06	down	Lipoxygenase.
Os04g0329500	4.17694	8.86076e-06	0.000374624	down	OSIGBa0113K06.4 protein.
Os03g0781000	2.05141	1.47603e-06	8.63023e-05	down	Conserved hypothetical protein.
Os04g0683600	2.52141	2.79432e-08	4.06963e-06	down	H0306F12.6 protein.
Os03g0321300	3.71384	2.07989e-09	4.54984e-07	down	Cyclin-like F-box domain containing protein.
Os05g0463400	2.1962	2.32076e-07	2.10401e-05	down	PWWP domain containing protein.
Os11g0141900	3.13497	2.41852e-07	2.17189e-05	down	Ankyrin domain containing protein.
Os03g0741500	2.95511	1.71683e-07	1.67829e-05	down	Cytochrome P450 family protein expressed.
Os10g0446400	2.16573	3.90052e-06	0.000188244	down	SANT domain DNA binding domain containing protein.
Os04g0625900	2.00258	2.54401e-07	2.26105e-05	down	OSIGBa0148A10.9 protein.
Os03g0411500	2.05862	3.5427e-08	4.90766e-06	down	Subunit of the chloroplast Clp (plastidic caseinolytic protease) Chloroplast biogenesis and leaf development
Os03g0343800	2.28897	8.11268e-09	1.45276e-06	down	Conserved hypothetical protein.
Os11g0142101	2.22846	3.01086e-11	4.28807e-08	down	Hypothetical gene.
Os01g0210800	3.03758	1.01749e-07	1.12998e-05	down	Conserved hypothetical protein.
Os02g0129800	2.50518	1.66076e-08	2.64964e-06	down	Conserved hypothetical protein.
Os03g0254900	2.00296	1.14702e-10	6.60695e-08	down	zinc finger (C3HC4-type RING finger) family protein.
Os08g0438600	2.93696	5.97172e-09	1.11273e-06	down	Exostosin-like family protein.
Os02g0435000	3.48113	1.60913e-07	1.59936e-05	down	Translocation protein Sec62 family protein.
Os11g0687200	7.81522	3.31181e-08	4.65238e-06	down	Hypothetical conserved gene.
Os01g0809000	6.24609	7.075e-06	0.000309748	down	Hypothetical protein.
Os11g0635000	2.45618	3.79434e-07	3.05564e-05	down	Conserved hypothetical protein.
Os03g0184600	2.82491	7.14404e-07	4.93615e-05	down	Dihydroflavonol-4-reductase.
Os10g0520400	2.85694	6.72638e-07	4.72243e-05	down	Protein of unknown function DUF295 family protein.
Os09g0296400	2.79319	6.13488e-08	7.61528e-06	down	predicted protein.
Os02g0662100	2.77132	1.14907e-07	1.23648e-05	down	Tfm5 protein.
Os01g0848400	2.03862	8.34153e-09	1.48681e-06	down	BEL1-type homeobox family Seed shattering
Os04g0490900	2.37714	6.75341e-06	0.000297672	down	OSIGBa0130B08.4 protein.
Os05g0204900	2.17109	2.05061e-08	3.14579e-06	down	serine/threonine-protein phosphatase 5.
Os05g0319100	2.11572	1.31662e-06	7.91599e-05	down	Putative mannan endo-14-beta-mannosidase 5.
Os01g0197500	2.49113	2.62704e-12	2.46158e-08	down	predicted protein.
Os04g0688100	2.03339	2.69069e-07	2.3631e-05	down	Peroxidase (EC 1.11.1.7).
Os07g0108200	9.07362	8.63813e-07	5.70198e-05	down	transparent testa 12 protein.
Os11g0172100	4.23214	5.52808e-06	0.000252563	down	Pectinesterase.
Os02g0196300	2.54079	1.16346e-07	1.2491e-05	down	Outer envelope protein of 80 kDa.
Os07g0689800	2.23698	8.15083e-07	5.44492e-05	down	Tetratricopeptide-like helical domain containing protein.
Os12g0284850	2.8399	3.91969e-08	5.32179e-06	down	Hypothetical gene.
Os09g0524800	9.23022	1.73178e-06	9.78717e-05	down	Apoptosis regulator Bcl-2 protein BAG domain containing protein.
Os06g0589500	23.439	9.24849e-07	6.01102e-05	down	Conserved hypothetical protein.
Os05g0360400	3.65932	4.68743e-10	1.40255e-07	down	Zinc finger RING/FYVE/PHD-type domain containing protein.
Os07g0280200	2.65762	1.2994e-07	1.35548e-05	down	AMP-dependent synthetase and ligase domain containing protein.
Os02g0755500	2.41926	7.69013e-09	1.38354e-06	down	UDP-glycosyltransferase 85A8.
Os01g0627450	4.66753	2.65742e-06	0.00013806	down	Hypothetical protein.
Os01g0636400	2.08142	5.97943e-07	4.3226e-05	down	Alpha/beta hydrolase family protein.
Os03g0202500	12.2564	3.22352e-06	0.000161115	down	Cyclin-like F-box domain containing protein.
Os04g0388800	2.27802	5.2662e-06	0.000242195	down	Molecular chaperone heat shock protein Hsp40 DnaJ domain containing protein.
Os12g0609500	2.29206	3.14233e-07	2.64915e-05	down	Glucose/ribitol dehydrogenase family protein.
Os04g0505200	2.86554	3.76073e-08	5.14729e-06	down	Protein binding protein.
Os12g0138600	2.51252	1.65397e-09	3.74572e-07	down	Hypothetical protein.
Os02g0608000	2.55241	8.87722e-09	1.56974e-06	down	Protein of unknown function DUF1218 domain containing protein.
Os03g0379700	2.44865	1.85354e-06	0.000103741	down	Hypothetical conserved gene.
Os09g0132200	3.67085	9.76554e-09	1.69978e-06	down	anther-specific proline-rich protein APG.
Os07g0576550	12.1457	2.03405e-08	3.12833e-06	down	Hypothetical protein.
Os05g0489900	2.40116	1.03796e-06	6.56355e-05	down	Ca/calmodulin-dependent protein kinase Calcium/calmodulin-dependent protein kinase Bacterial and fungal symbioses Common symbiosis signaling (SYM) pathway
Os10g0109300	2.61512	2.99079e-10	1.07159e-07	down	Peroxidase 54.
Os01g0226200	2.28697	2.56715e-08	3.78835e-06	down	Conserved hypothetical protein.
Os05g0560900	23.6341	8.22755e-07	5.48231e-05	down	Isopenicillin N synthase family protein.
Os07g0516801	2.34102	3.05985e-07	2.59669e-05	down	Hypothetical gene.
Os06g0676700	2.22757	1.01611e-07	1.12875e-05	down	High pI alpha-glucosidase.
Os06g0709400	2.14465	3.27234e-07	2.73206e-05	down	Conserved hypothetical protein.
Os01g0968700	3.11153	2.09979e-06	0.000114507	down	Eukaryotic tRNA isopentenyltransferase.
Os09g0276000	2.41164	1.00615e-06	6.41108e-05	down	Hypothetical protein.
Os02g0628600	2.06986	2.49299e-08	3.70075e-06	down	Auxin response factor 8.
Os04g0574200	2.345	5.27177e-06	0.000242424	down	FAS1 domain domain containing protein.
Os02g0673000	2.06253	9.20518e-09	1.61958e-06	down	Uncharacterised protein family UPF0005 domain containing protein.
Os01g0313300	2.49333	3.15155e-07	2.6548e-05	down	EREBP-3 protein (Fragment).
Os03g0708400	2.30046	1.27555e-07	1.33587e-05	down	Protein of unknown function DUF1295 family protein.
Os04g0320100	2.17391	7.42067e-06	0.000322279	down	Coenzyme F420 hydrogenase/dehydrogenase beta subunit N-terminal domain containing protein.
Os05g0221200	2.05667	1.19307e-06	7.3305e-05	down	Protein of unknown function DUF538 domain containing protein.
Os05g0380300	8.81313	2.26085e-07	2.06362e-05	down	NBS-LRR protein (Fragment).
Os04g0483500	2.00072	6.48376e-06	0.000287797	down	Beta-ketoacyl-CoA reductase Cuticular wax biosynthesis Fatty acid elongation
Os09g0447300	4.287	1.10509e-06	6.8942e-05	down	Cytochrome P450 family protein.
Os04g0642000	3.66343	1.42095e-07	1.45392e-05	down	H0423H10.7 protein.
Os06g0476200	2.06204	1.25758e-10	6.79506e-08	down	predicted protein.
Os07g0467800	2.05918	3.66216e-07	2.97618e-05	down	Transposon protein.
Os01g0121300	6.91003	5.58651e-08	7.06527e-06	down	Conserved hypothetical protein.
Os04g0516300	3.32194	2.877e-08	4.15994e-06	down	OSIGBa0115M15.10 protein.
Os02g0121700	6.51456	4.52896e-07	3.48716e-05	down	Terpenoid synthase domain containing protein.
Os01g0870100	2.63509	8.14561e-06	0.000349385	down	Ion channel POLLUX.
Os11g0610700	3.28999	1.9057e-08	2.96326e-06	down	WD40 repeat-like domain containing protein.
Os09g0517600	2.48334	2.55245e-07	2.26617e-05	down	FH protein NFH1.
Os02g0781400	3.51953	1.16666e-10	6.63761e-08	down	Chaperonin.
Os03g0118400	2.35129	5.85712e-07	4.25633e-05	down	Cyclin-dependent kinase A-1.
Os12g0509100	5.18382	7.13266e-07	4.93232e-05	down	Conserved hypothetical protein.
Os11g0614500	2.08915	1.71525e-09	3.86356e-07	down	Patatin-like protein.
Os04g0597400	13.0769	1.38488e-06	8.21852e-05	down	OSJNba0093F12.10 protein.
Os04g0481100	3.19319	2.99141e-07	2.55399e-05	down	H0510A06.3 protein.
Os04g0282400	2.69292	7.70892e-07	5.22057e-05	down	FPF1 protein-like (RAA1).
Os05g0338933	2.05632	3.38238e-07	2.80142e-05	down	proton-dependent oligopeptide transport (POT) family protein.
Os10g0155400	4.7377	1.12089e-06	6.97527e-05	down	Amidase family protein expressed.
Os07g0232800	3.98556	2.29126e-07	2.08417e-05	down	Zinc transporter protein ZIP1.
Os06g0725700	4.01465	4.75455e-08	6.23504e-06	down	Protein of unknown function DUF241 plant family protein.
Os07g0485400	2.34826	5.92968e-12	3.46241e-08	down	asparaginyl-tRNA synthetase.
Os10g0555900	2.15423	4.47842e-07	3.45707e-05	down	Beta-expansin precursor.
Os04g0422900	2.71815	9.77479e-06	0.0004064	down	Hypothetical conserved gene.
Os03g0364400	3.01182	1.71274e-08	2.71375e-06	down	Phytosulfokine receptor-like protein.
Os06g0121500	7.40506	5.01171e-06	0.000232565	down	Peptidase A1 domain containing protein.
Os06g0542300	6.41528	2.68479e-07	2.35988e-05	down	Heavy metal transport/detoxification protein domain containing protein.
Os10g0467900	2.14093	3.49447e-07	2.87309e-05	down	Protein kinase catalytic domain domain containing protein.
Os02g0653400	2.38968	5.02088e-06	0.000232887	down	OSIGBa0101C23.8 protein.
Os05g0141400	2.5737	4.1974e-08	5.62479e-06	down	tRNA/rRNA methyltransferase SpoU domain containing protein.
Os06g0282400	2.96364	5.49326e-08	6.97744e-06	down	UDP-glycosyltransferase.
Os02g0666600	5.48944	3.61739e-06	0.000177075	down	Harpin-induced 1 domain containing protein.
Os02g0232500	2.24371	5.23455e-08	6.72797e-06	down	Receptor-like serine/threonine kinase.
Os04g0565450	2.89683	3.10083e-08	4.42755e-06	down	Conserved hypothetical protein.
Os06g0504900	2.19615	5.8475e-06	0.0002643	down	WRKY transcription factor 31.
Os06g0297400	4.68275	5.97772e-06	0.000269164	down	Conserved hypothetical protein.
Os06g0705600	6.28713	4.55512e-07	3.50348e-05	down	Oligopeptide transporter domain containing protein.
Os02g0609800	2.13938	6.79439e-06	0.000299198	down	Hypothetical conserved gene.
Os07g0112100	2.36383	3.04706e-06	0.000153879	down	J023132I08 full insert sequence.
Os07g0677200	3.55049	1.84161e-08	2.88159e-06	down	Peroxidase.
Os07g0115300	5.87978	6.68783e-10	1.79413e-07	down	Peroxidase2 precursor (EC 1.11.1.7).
Os04g0468600	3.06056	5.62637e-09	1.05947e-06	down	cDNA clone:006-303-A07 full insert sequence.
Os01g0821600	2.85052	6.23233e-11	5.29109e-08	down	WRKY transcription factor 48-like protein (WRKY transcription factor 21).
Os02g0798900	4.15923	9.34578e-06	0.000391761	down	F-box domain containing protein.
Os04g0432000	4.95741	5.05517e-08	6.54803e-06	down	Serine/threonine protein kinase Hyperosmotic stress response
Os06g0193200	3.73295	7.92256e-11	5.70253e-08	down	Pectin methylesterase 8 (Fragment).
Os04g0665666	7.21429	4.24859e-08	5.68617e-06	down	Conserved hypothetical protein.
Os12g0418900	2.00575	9.91005e-11	5.99881e-08	down	Hypothetical conserved gene.
Os11g0193300	3.4375	2.00516e-07	1.89022e-05	down	Hypothetical conserved gene.
Os12g0289800	2.30879	1.21336e-09	2.89012e-07	down	Hypothetical conserved gene.
Os07g0575700	4.71011	3.67603e-08	5.05141e-06	down	Lectin-like receptor kinase 7%3B2.
Os11g0117600	4.02834	8.52413e-08	9.9105e-06	down	WRKY transcription factor 50 (Fragment).
Os01g0276200	2.15986	4.93826e-07	3.72651e-05	down	Mitochondrial import receptor subunit TOM40.
Os03g0246100	13.5649	2.02308e-08	3.11485e-06	down	Glycoside hydrolase family 17 protein.
Os11g0700500	2.23195	1.97991e-09	4.37349e-07	down	Snapdragon myb protein 305 homolog.
Os04g0434600	4.42298	8.54431e-08	9.92976e-06	down	OSIGBa0102D10.3 protein.
Os02g0451900	2.18163	9.37213e-06	0.000392652	down	Conserved hypothetical protein.
Os01g0207500	2.57828	1.95978e-08	3.03396e-06	down	Hypothetical protein.
Os01g0870100	2.93137	8.2809e-08	9.69023e-06	down	Ion channel POLLUX.
Os02g0445100	2.19221	3.61413e-08	4.98213e-06	down	Auxin-induced SAUR-like protein.
Os05g0217900	2.94286	2.59152e-10	9.61113e-08	down	Hypothetical conserved gene.
Os03g0102700	2.14744	8.67916e-07	5.71741e-05	down	Expansin-B7.
Os02g0700500	2.00735	1.18038e-07	1.25991e-05	down	Polyamine uptake transporter High-affinity spermidine transporter Import of spermidine transported via phloem Polyamine uptake
Os08g0455900	8.92913	2.18658e-06	0.000118304	down	Putative copper transporter 5.2.
Os05g0476100	2.2009	2.24603e-08	3.39993e-06	down	Protein of unknown function DUF827 plant family protein.
Os02g0557600	3.09877	1.55763e-08	2.51163e-06	down	Translation initiation factor SUI1 domain containing protein.
Os03g0314500	4.29979	2.1112e-09	4.60813e-07	down	Hypothetical conserved gene.
Os07g0285700	4.39877	2.6248e-07	2.31823e-05	down	Cyclin-like F-box domain containing protein.
Os04g0379500	2.57069	7.96366e-12	4.05657e-08	down	Non-protein coding transcript.
Os12g0501700	6.70707	1.71404e-06	9.71419e-05	down	Transcription factor MADS-box domain containing protein.
Os01g0764950	2.02756	1.32476e-08	2.19302e-06	down	Pentatricopeptide repeat domain containing protein.
Os10g0431900	4.33815	2.68835e-06	0.000139239	down	Serine/threonine protein kinase-related domain containing protein.
Os07g0112100	2.21527	1.43515e-06	8.4543e-05	down	J023132I08 full insert sequence.
Os02g0809900	67.8	3.48735e-06	0.000172064	down	Quinoprotein amine dehydrogenase beta chain-like domain containing protein.
Os05g0511700	2.45736	3.52132e-08	4.88124e-06	down	Putative rRNA methylase family protein.
Os07g0647300	2.04428	8.42998e-08	9.83475e-06	down	Conserved hypothetical protein.
Os11g0291475	2.89041	1.1494e-10	6.61035e-08	down	Hypothetical protein.
Os03g0633500	2.51211	1.45794e-07	1.48459e-05	down	A member of Aux/IAA family protein Regulation of lateral root initiation
Os12g0267700	2.28605	4.78981e-07	3.6442e-05	down	Hypothetical conserved gene.
Os06g0179000	2.50518	2.01397e-08	3.10422e-06	down	Glycoside hydrolase family 79 N-terminal protein.
Os03g0324600	6.97131	6.77724e-06	0.000298598	down	NB-ARC domain containing protein.
Os02g0247200	3.93085	2.21342e-08	3.36139e-06	down	T-complex protein 1 gamma subunit (TCP-1-gamma) (CCT-gamma) (Matricin) (mTRiC-P5).
Os09g0498600	2.61972	2.47961e-08	3.6875e-06	down	K Homology type 1 domain containing protein.
Os06g0567200	3.00105	7.52625e-07	5.12589e-05	down	Cupredoxin domain containing protein.
Os02g0768300	6.27491	9.38644e-14	9.92123e-09	down	Protein of unknown function DUF6 transmembrane domain containing protein.
Os11g0166100	2.00933	2.77866e-06	0.000142988	down	Cyclin-like F-box domain containing protein.
Os07g0272400	2.0064	2.45181e-06	0.000129786	down	Zinc finger RING/FYVE/PHD-type domain containing protein.
Os11g0687200	13.8796	1.21158e-08	2.03919e-06	down	Hypothetical conserved gene.
Os12g0541200	2.28787	9.76139e-09	1.69976e-06	down	Conserved hypothetical protein.
Os01g0779800	2.396	8.13266e-08	9.55113e-06	down	SR protein related family member.
Os08g0447000	2.29889	6.99427e-08	8.45371e-06	down	D-3-phosphoglycerate dehydrogenase.
Os03g0288101	2.04723	4.92153e-09	9.44089e-07	down	Conserved hypothetical protein.
Os11g0263000	8.83333	1.25529e-06	7.62788e-05	down	Leucine Rich Repeat family protein expressed.
Os01g0823100	2.35359	5.38322e-08	6.87189e-06	down	Alpha-expansin OsEXPA2.
Os01g0592900	3.19243	2.57708e-06	0.00013463	down	regulator of telomere elongation helicase 1.
Os02g0170100	2.9514	7.44258e-08	8.90257e-06	down	Glycine cleavage H-protein family protein.
Os11g0189600	3.59223	6.53507e-07	4.61571e-05	down	cDNA clone:J013062J12 full insert sequence.
Os02g0798000	2.27432	2.77634e-11	4.28807e-08	down	Hypothetical conserved gene.
Os10g0525400	2.56335	1.25638e-11	4.17983e-08	down	glutathione S-transferase GST 34.
Os04g0468000	7.19383	3.52269e-09	7.13979e-07	down	OSIGBa0128P10.7 protein.
Os05g0477600	2.24779	1.61283e-10	7.49454e-08	down	Non-protein coding transcript.
Os02g0192500	2.04178	5.58807e-06	0.00025478	down	cDNA clone:J033103E20 full insert sequence.
Os11g0593700	4.08067	9.81474e-08	1.09893e-05	down	Cyclin-like F-box domain containing protein.
Os04g0532700	4.9571	8.0251e-06	0.00034495	down	Hypothetical protein.
Os04g0389800	4.78827	2.02332e-11	4.17983e-08	down	OSIGBa0096P03.6 protein.
Os05g0214900	3.07653	2.75932e-10	1.00241e-07	down	A_IG002N01.14 protein.
Os04g0631200	2.45488	2.39187e-07	2.15482e-05	down	Xyloglucan endotransglycosylase (Fragment).
Os04g0561500	5.17031	8.49591e-08	9.8871e-06	down	Prolyl endopeptidase (EC 3.4.21.26) (Post-proline cleaving enzyme) (PE).
Os12g0431100	6.20188	2.42564e-06	0.000128601	down	ATPase AAA-type core domain containing protein.
Os02g0200900	2.45165	1.54441e-07	1.5473e-05	down	F-box family member.
Os08g0351300	2.72356	1.04796e-09	2.56406e-07	down	Conserved hypothetical protein.
Os03g0174300	2.63636	1.38733e-07	1.42574e-05	down	Exostosin-like family protein.
Os11g0229300	60.8	3.11827e-06	0.000156819	down	NBS-LRR-like protein.
Os04g0476400	16.8462	9.16008e-06	0.000385204	down	OSIGBa0106G07.13 protein.
Os03g0103200	2.17822	6.89829e-08	8.35682e-06	down	Physical impedance induced protein.
Os06g0314501	2.88785	1.7565e-08	2.76894e-06	down	Conserved hypothetical protein.
Os04g0412900	2.2025	3.39794e-07	2.81083e-05	down	Zinc finger Sec23/Sec24-type domain containing protein.
Os12g0215100	2.48078	2.98937e-06	0.000151653	down	Hypothetical conserved gene.
Os06g0342750	2.0418	4.21537e-08	5.64707e-06	down	predicted protein.
Os01g0860300	2.21381	3.61628e-06	0.000177041	down	Ribosomal protein L1.
Os08g0557400	2.47925	2.30064e-07	2.0918e-05	down	Protein tyrosine phosphatase-like protein.
Os01g0966300	2.08553	3.82157e-06	0.000185247	down	Mitochondrial processing peptidase.
Os01g0279800	3.02473	9.09691e-12	4.17983e-08	down	BRASSINOSTEROID INSENSITIVE 1-associated receptor kinase 1.
Os07g0562400	11.3878	9.50082e-10	2.3711e-07	down	Major facilitator superfamily protein.
Os09g0522000	9.07812	1.05051e-06	6.62416e-05	down	Dehydration-responsive element-binding protein 1B.
Os04g0585300	2.58681	2.96813e-08	4.27271e-06	down	H0307D04.2 protein.
Os07g0540600	2.41344	5.84461e-12	3.46241e-08	down	Gnk2-homologous domain domain containing protein.
Os05g0517100	11.4531	1.06773e-09	2.59102e-07	down	Hypothetical conserved gene.
Os10g0341800	3.54113	1.90193e-06	0.00010578	down	Hypothetical conserved gene.
Os08g0175700	7.28421	1.53986e-07	1.54457e-05	down	Hypothetical protein.
Os06g0645400	2.08678	1.59665e-10	7.4839e-08	down	ATP binding protein (Fragment).
Os02g0749400	2.11594	4.84722e-07	3.67729e-05	down	Hypothetical protein.
Os05g0384600	3.74449	2.9954e-06	0.000151923	down	ATPase coupled to transmembrane movement of substances.
Os02g0822150	2.10431	1.40108e-09	3.25294e-07	down	Hypothetical protein.
Os09g0443400	3.20394	4.5428e-07	3.4959e-05	down	Hypothetical conserved gene.
Os01g0644600	2.07854	9.66506e-07	6.21962e-05	down	Glutelin family protein.
Os01g0961600	2.49195	5.97894e-07	4.3226e-05	down	Conserved hypothetical protein.
Os01g0652200	2.83516	8.58333e-08	9.95323e-06	down	Hypothetical protein.
Os03g0762700	2.20369	6.60928e-09	1.21423e-06	down	Transcriptional coactivator SAGA-type complex Ada1/Tada1 domain containing protein.
Os06g0118800	2.88726	5.44406e-07	4.01564e-05	down	Conserved hypothetical protein.
Os09g0565500	2.47606	6.87336e-06	0.000302266	down	Conserved hypothetical protein.
Os03g0280000	2.33568	9.28413e-12	4.17983e-08	down	MDR-like ABC transporter.
Os08g0460800	3.15371	7.26165e-08	8.72947e-06	down	Hypothetical conserved gene.
Os02g0768300	2.15291	9.43328e-07	6.10765e-05	down	Protein of unknown function DUF6 transmembrane domain containing protein.
Os12g0167900	3.40442	3.5816e-08	4.9502e-06	down	Ribosomal protein L3A
Os08g0535200	2.71918	9.67464e-06	0.00040302	down	MtN3-like protein.
Os10g0104900	6.70183	8.4435e-06	0.000360043	down	Chromomethylase Plant development Silencing of transposable elements (TEs)
Os04g0610900	2.6642	2.50249e-11	4.28807e-08	down	EDR1.
Os04g0425100	2.30014	7.83827e-08	9.29056e-06	down	OSIGBa0076I14.12 protein.
Os05g0245700	2.33193	1.46743e-06	8.59894e-05	down	Hypothetical protein.
Os04g0209300	2.26814	1.29954e-11	4.17983e-08	down	Glutathione-conjugate transporter AtMRP4.
Os05g0481100	2.50929	2.09486e-07	1.94956e-05	down	cDNA clone:J013021N20 full insert sequence.
Os09g0479000	6.99015	2.12521e-07	1.97217e-05	down	FIMBRIATA-like protein.
Os11g0550100	5.62882	1.26905e-06	7.69676e-05	down	NB-ARC domain containing protein expressed.
Os11g0685400	2.06087	3.01412e-06	0.000152597	down	Hypothetical conserved gene.
Os01g0339600	3.07509	5.60259e-06	0.000255388	down	Proteasome assembly chaperone 3 domain containing protein.
Os04g0650700	2.04848	6.60358e-06	0.000291921	down	OSIGBa0113E10.3 protein.
Os03g0308900	2.62706	3.56821e-07	2.9206e-05	down	Fip1 motif family protein expressed.
Os08g0137600	2.6529	8.42861e-11	5.71995e-08	down	Hypothetical protein.
Os08g0245200	3.73865	3.80712e-13	1.28914e-08	down	4-coumarate:coenzyme A ligase Lignin biosynthesis
Os01g0311300	2.1934	6.41839e-07	4.55307e-05	down	Sorbitol transporter.
Os07g0551300	4.65374	6.73609e-09	1.23502e-06	down	KI domain interacting kinase 1.
Os07g0409900	2.22186	7.80903e-10	2.03009e-07	down	Calcium-dependent protein kinase.
Os11g0549690	3.12	9.35781e-07	6.06715e-05	down	Hypothetical conserved gene.
Os03g0672900	6.36052	5.31739e-06	0.00024423	down	Glycoside hydrolase family 10 domain containing protein.
Os02g0117100	2.28005	2.95702e-06	0.000150282	down	4-diphosphocytidyl-2C-methyl-D-erythritol synthase conserved site domain containing protein.
Os06g0220701	4.70629	1.13907e-07	1.22791e-05	down	Hypothetical gene.
Os07g0489200	2.31819	2.08019e-09	4.54984e-07	down	UDP-glucuronosyl/UDP-glucosyltransferase family protein.
Os09g0452300	2.60185	2.52439e-09	5.32038e-07	down	cDNA clone: J065054A13 full insert sequence.
Os03g0215200	2.49162	1.15255e-08	1.95462e-06	down	Putative transcription factor Carpel specification Midrib formation
Os10g0191300	14.456	2.01191e-08	3.10217e-06	down	PR-1a pathogenesis related protein (Hv-1a) precursor.
Os03g0672300	15.3875	1.96687e-07	1.86535e-05	down	Pyruvate kinase.
Os04g0337800	13.7123	5.56762e-06	0.000253957	down	IN2-2 protein.
Os01g0927500	6.98404	6.11325e-06	0.000274492	down	Serine/threonine protein kinase-related domain containing protein.
Os07g0471100	2.36937	3.61075e-07	2.94538e-05	down	SET domain containing protein.
Os06g0309550	2.71495	8.46665e-07	5.61244e-05	down	Hypothetical gene.
Os02g0768300	9.61364	3.51946e-06	0.000173264	down	Protein of unknown function DUF6 transmembrane domain containing protein.
Os03g0735100	2.1717	6.51057e-08	7.97856e-06	down	Quinoprotein amine dehydrogenase beta chain-like domain containing protein.
Os11g0305300	2.0125	6.58962e-08	8.04745e-06	down	Hypothetical gene.
Os12g0527500	8.37089	5.79751e-11	5.06432e-08	down	Cyclin-like F-box domain containing protein.
Os04g0295200	3.76805	1.8756e-07	1.79652e-05	down	Hypothetical protein.
Os09g0369400	2.93542	6.70557e-09	1.23049e-06	down	predicted protein.
Os02g0819200	6.58521	2.53416e-08	3.74753e-06	down	Thioredoxin domain 2 containing protein.
Os03g0107300	3.24504	2.99665e-07	2.55641e-05	down	Anion transporter Silicon efflux transporter Arsenic species (As) uptake
Os11g0452400	2.03508	1.05159e-11	4.17983e-08	down	Conserved hypothetical protein.
Os10g0532800	4.08485	5.05289e-08	6.54708e-06	down	Conserved hypothetical protein.
Os03g0727900	2.58165	1.81277e-09	4.05728e-07	down	GTP1/OBG domain containing protein.
Os07g0551700	3.04293	1.36755e-07	1.40893e-05	down	Cellulose synthase (Fragment).
Os03g0733600	51.641	3.75715e-09	7.50347e-07	down	SSXT family protein.
Os03g0852900	2.62184	5.20916e-06	0.000240103	down	Cleavage and polyadenylation specificity factor 73 kDa subunit (CPSF 73 kDa subunit).
Os09g0502566	5.3982	2.17117e-06	0.000117641	down	Hypothetical gene.
Os09g0526800	2.79146	1.47828e-12	2.08491e-08	down	NC domain-containing protein.
Os12g0632401	3.25669	3.56455e-06	0.000174974	down	Hypothetical conserved gene.
Os05g0324200	5.06832	8.5118e-06	0.000362334	down	N2N2-dimethylguanosine tRNA methyltransferase family protein.
Os08g0452100	3.56415	2.16518e-06	0.000117414	down	Subtilisin-like serine protease.
Os01g0115500	2.11263	6.55959e-06	0.000290431	down	Receptor-like kinase.
Os11g0446000	2.06682	4.19635e-08	5.62479e-06	down	Nuclear protein homologous to the regulatory domain of the R/B-like bHLH transcription factors Regulation of jasmonate-induced gene expression and root cell elongation
Os01g0687400	3.31926	6.74927e-08	8.20922e-06	down	Chitinase (EC 3.2.1.14).
Os06g0203800	2.7924	9.98489e-06	0.000413671	down	Receptor-like kinase Heat tolerance
Os10g0347000	111.9	1.72726e-08	2.72997e-06	down	X8 domain containing protein.
Os09g0503400	2.04914	1.32847e-06	7.97137e-05	down	Valyl/Leucyl/Isoleucyl-tRNA synthetase class I anticodon-binding domain containing protein.
Os05g0181000	2.64053	2.15323e-09	4.67385e-07	down	Heat shock protein Hsp70 family protein.
Os11g0150700	2.86992	4.31698e-07	3.35943e-05	down	Serine/threonine protein kinase domain containing protein.
Os07g0191650	2.9896	6.11127e-07	4.39241e-05	down	F-box domain containing protein expressed.
Os07g0233300	2.20551	9.2572e-11	5.90423e-08	down	cDNA clone:J033048B22 full insert sequence.
Os06g0187500	2.05912	1.79338e-10	8.02739e-08	down	Hypothetical conserved gene.
Os10g0502100	2.48694	1.83692e-07	1.76668e-05	down	Conserved hypothetical protein.
Os06g0566201	2.91031	4.93588e-09	9.46413e-07	down	Hypothetical gene.
Os11g0499600	2.00192	1.25936e-06	7.64569e-05	down	cis-23-dihydrobiphenyl-23-diol dehydrogenase.
Os12g0144200	2.06054	1.21187e-10	6.75946e-08	down	Jasmonate-induced protein.
Os04g0190000	4.03727	5.52596e-07	4.06034e-05	down	OSIGBa0111E13.1 protein.
Os03g0749800	2.09124	1.37255e-08	2.25798e-06	down	Tousled-like kinase (Fragment).
Os04g0469425	4.07107	1.00286e-07	1.11667e-05	down	Hypothetical protein.
Os02g0727400	2.14752	4.03096e-07	3.19387e-05	down	Hypothetical protein.
Os05g0108400	2.51693	8.11446e-06	0.000348261	down	Protein of unknown function DUF868 plant family protein.
Os05g0362600	9.2605	5.35986e-06	0.00024594	down	Late embryogenesis abundant protein LEA-5 domain containing protein.
Os09g0482860	93.8	1.9676e-07	1.86563e-05	down	cDNA clone:001-204-H11 full insert sequence.
Os01g0870100	6.21086	9.65133e-06	0.000402098	down	Ion channel POLLUX.
Os06g0115200	2.26573	4.77284e-08	6.25514e-06	down	Quinonprotein alcohol dehydrogenase-like domain containing protein.
Os07g0679500	2.25132	9.28065e-06	0.000389533	down	Transcription factor RF2b.
Os11g0540600	2.01307	4.67956e-10	1.40118e-07	down	Protein of unknown function DUF247 plant family protein.
Os05g0555450	3.37342	3.04688e-06	0.000153879	down	Hypothetical gene.
Os02g0596100	2.74773	2.09061e-06	0.000114094	down	GLE1-like domain containing protein.
Os01g0155500	2.94149	5.44011e-06	0.000249109	down	Protein kinase catalytic domain domain containing protein.
Os07g0190000	3.18558	4.56661e-08	6.02557e-06	down	1-deoxy-D-xylulose 5-phosphate synthase 2 precursor.
Os01g0114800	2.6307	2.5795e-06	0.000134707	down	H0215A08.3 protein.
Os07g0246200	2.10218	5.5461e-07	4.07372e-05	down	calreticulin2.
Os05g0551350	2.01697	6.153e-08	7.62731e-06	down	Hypothetical conserved gene.
Os03g0166000	2.00042	3.69256e-06	0.000180087	down	Alba DNA/RNA-binding protein family protein.
Os09g0488800	2.46903	9.20194e-06	0.000386613	down	Retrovirus capsid C-terminal domain containing protein.
Os03g0645000	11.0748	9.64793e-10	2.40227e-07	down	Expansin-B12.
Os10g0478000	2.03081	1.49615e-07	1.5131e-05	down	Transcriptional regulator Regulator of meristem activity Regulation of inflorescence development
Os10g0533150	2.11976	7.69574e-10	2.00845e-07	down	BRASSINOSTEROID INSENSITIVE 1-associated receptor kinase 1.
Os05g0552200	2.63696	5.72457e-08	7.20754e-06	down	Glycosyl transferase family 31 protein.
Os04g0553800	2.3732	1.53548e-07	1.54091e-05	down	OSIGBa0143N19.10 protein.
Os02g0568600	4.45714	2.29499e-08	3.45302e-06	down	Hypothetical conserved gene.
Os02g0165800	4.90415	6.94988e-06	0.000305064	down	Conserved hypothetical protein.
Os01g0547600	2.29006	3.7099e-10	1.21308e-07	down	High-affinity nitrate transporter Nitrate transport Auxin signaling
Os04g0229100	3.0522	5.43676e-08	6.91518e-06	down	Sinapyl alcohol dehydrogenase.
Os11g0503400	2.16233	2.53649e-06	0.000133003	down	Conserved hypothetical protein.
Os03g0843800	2.45377	1.42365e-06	8.40328e-05	down	Methyl chloride transferase.
Os04g0416500	2.31269	4.12843e-08	5.55673e-06	down	Immunoglobulin/major histocompatibility complex conserved site domain containing protein.
Os01g0808900	2.29619	1.62871e-07	1.61114e-05	down	SigA binding protein.
Os05g0523200	3.51138	5.00538e-08	6.49947e-06	down	Hypothetical protein.
Os02g0799100	3.62871	8.51442e-08	9.90319e-06	down	Shugoshin Synaptonemal complex stabilization Protection of centromeric cohesion in meiosis
Os05g0176000	2.08355	4.57287e-07	3.51329e-05	down	fibrillarin-2.
Os04g0269700	2.41314	5.51097e-07	4.05306e-05	down	Lipase GDSL domain containing protein.
Os07g0584200	2.23166	1.04911e-06	6.61922e-05	down	BTB/POZ fold domain containing protein.
Os09g0444200	2.31504	5.07626e-07	3.80936e-05	down	predicted protein.
Os12g0568100	2.33985	8.68842e-08	1.00424e-05	down	Zinc knuckle family protein expressed.
Os09g0431100	5.32515	1.27505e-08	2.1257e-06	down	GPCR family 3 metabotropic glutamate receptor-like protein.
Os01g0854000	3.81764	1.37333e-11	4.17983e-08	down	AER.
Os10g0445400	3.07977	2.38979e-08	3.57656e-06	down	Zinc finger RING/FYVE/PHD-type domain containing protein.
Os12g0267900	2.18612	9.76531e-06	0.000406046	down	Zinc finger RING/FYVE/PHD-type domain containing protein.
Os05g0568800	2.4473	1.61288e-07	1.60223e-05	down	Protein of unknown function DUF1645 family protein.
Os11g0496500	2.18311	6.50497e-11	5.47856e-08	down	AT.I.24-5 protein (Fragment).
Os07g0568400	2.11739	1.88132e-07	1.80037e-05	down	TB2/DP1 and HVA22 related protein family protein.
Os12g0559200	5.73253	3.17466e-08	4.51013e-06	down	Lipoxygenase.
Os08g0167500	2.04257	8.33542e-08	9.74055e-06	down	Protein of unknown function DUF1817 domain containing protein.
Os05g0597100	2.01299	2.24314e-08	3.39676e-06	down	Histone H4 deacetylase Negative regulation of innate immunity
Os12g0603700	2.80584	1.80837e-11	4.17983e-08	down	CBL-interacting protein kinase 4.
Os09g0527100	3.97883	1.03886e-06	6.56825e-05	down	Hypothetical conserved gene.
Os11g0117500	2.59924	1.0262e-07	1.1375e-05	down	DNA-binding WRKY domain containing protein.
Os02g0503100	2.06857	4.13996e-10	1.27645e-07	down	flavonoid 3-monooxygenase.
Os03g0201700	8.72789	1.67554e-06	9.55002e-05	down	Histone acetylation protein 2 domain containing protein.
Os08g0161800	10.5714	1.13386e-07	1.22447e-05	down	Cholinephosphate cytidylyltransferase.
Os04g0662850	3.16224	5.43049e-07	4.01043e-05	down	Hypothetical protein.
Os07g0670300	2.12471	3.49789e-08	4.85673e-06	down	C2 calcium-dependent membrane targeting domain containing protein.
Os01g0889800	2.26925	1.04393e-11	4.17983e-08	down	Rhodanese-like domain containing protein.
Os12g0588800	3.13314	2.14014e-07	1.98037e-05	down	Cyclin D domain containing protein.
Os01g0945400	2.57557	2.5099e-10	9.37992e-08	down	Hypothetical protein.
Os08g0128000	2.35961	2.49244e-07	2.2241e-05	down	Galactose oxidase/kelch beta-propeller domain containing protein.
Os05g0237200	2.81266	3.34699e-06	0.000166323	down	Non-protein coding transcript.
Os01g0921550	3.24014	8.22647e-06	0.000352103	down	Hypothetical protein.
Os09g0394500	2.01235	1.69724e-07	1.66337e-05	down	predicted protein.
Os06g0688100	2.20586	4.76519e-10	1.41878e-07	down	Hypothetical conserved gene.
Os06g0317200	2.13191	2.14041e-08	3.26503e-06	down	Glycine-rich protein (Fragment).
Os03g0165400	2.68882	2.57158e-12	2.46158e-08	down	Beta-galactosidase.
Os06g0499301	2.44436	1.27567e-08	2.12589e-06	down	Pentatricopeptide repeat domain containing protein.
Os11g0566800	4.03348	2.46576e-08	3.67077e-06	down	Bibenzyl synthase (EC 2.3.1.-).
Os07g0231700	2.05855	5.81843e-07	4.23622e-05	down	Hypothetical conserved gene.
Os07g0186150	68.6	8.14224e-06	0.000349275	down	Hypothetical protein.
Os07g0158500	2.21375	2.04628e-07	1.91871e-05	down	HAP2 subunit of HAP complex.
Os02g0714700	2.08268	7.47119e-11	5.70253e-08	down	Hypothetical protein.
Os05g0490300	2.02324	3.01906e-08	4.3357e-06	down	Cyclin-like F-box domain containing protein.
Os12g0152900	10.4163	1.77203e-09	3.97662e-07	down	bZIP transcription factor bZIP-1 domain containing protein.
Os05g0411150	6.88976	8.73488e-06	0.000370005	down	Hypothetical protein.
Os10g0107200	4.66479	1.20474e-06	7.38513e-05	down	Hypothetical protein.
Os11g0229000	2.71934	4.54268e-06	0.000214114	down	Hypothetical conserved gene.
Os05g0551650	2.34025	5.69763e-07	4.16632e-05	down	Hypothetical gene.
Os09g0443400	2.80383	1.77926e-07	1.72535e-05	down	Hypothetical conserved gene.
Os06g0683500	13.3562	2.80678e-07	2.43122e-05	down	predicted protein.
Os06g0578700	7.91707	4.59758e-07	3.52957e-05	down	von Willebrand factor type A domain containing protein.
Os07g0133500	2.44681	9.13167e-11	5.90333e-08	down	Protein of unknown function DUF1005 family protein.
Os03g0752200	2.16359	5.01267e-06	0.000232584	down	AtSPO11-1.
Os04g0459700	2.19503	2.20855e-07	2.03022e-05	down	Nucleosome assembly protein (NAP) family protein.
Os04g0302900	4.40979	1.72421e-06	9.75744e-05	down	Hypothetical gene.
Os11g0182200	2.15248	8.97694e-08	1.02898e-05	down	anthranilate N-benzoyltransferase protein 1.
Os12g0143400	2.63255	2.81276e-08	4.08663e-06	down	RED family protein.
Os10g0158700	2.1099	3.83446e-07	3.08032e-05	down	Conserved hypothetical protein.
Os02g0646700	2.33713	6.89641e-09	1.26059e-06	down	Hypothetical protein.
Os03g0832800	2.04452	9.78702e-07	6.27994e-05	down	Non-protein coding transcript.
Os03g0114000	4.70629	3.77053e-06	0.000183235	down	Kinesin.
Os08g0130500	2.03956	1.65795e-06	9.46735e-05	down	60S acidic ribosomal protein p0.
Os04g0561500	4.29963	7.79397e-08	9.25102e-06	down	Prolyl endopeptidase (EC 3.4.21.26) (Post-proline cleaving enzyme) (PE).
Os04g0482300	2.05213	7.50131e-09	1.35359e-06	down	Kelch related domain containing protein.
Os06g0341600	2.3706	2.20836e-07	2.03022e-05	down	Conserved hypothetical protein.
Os04g0688100	3.63419	1.0131e-07	1.12629e-05	down	Peroxidase (EC 1.11.1.7).
Os01g0333600	3.76356	3.09405e-08	4.42535e-06	down	Protein of unknown function DUF594 domain containing protein.
Os03g0634400	2.17843	1.67655e-10	7.64648e-08	down	Serine/threonine protein kinase domain containing protein.
Os08g0356700	2.60477	9.49647e-08	1.07296e-05	down	Protein of unknown function DUF247 plant family protein.
Os11g0577866	2.64692	5.51095e-06	0.000251862	down	Conserved hypothetical protein.
Os01g0514300	2.56301	3.59054e-07	2.93455e-05	down	Armadillo-type fold domain containing protein.
Os11g0214900	2.50607	3.87992e-09	7.70499e-07	down	Plant disease resistance response protein family protein.
Os01g0975300	2.21345	2.12855e-07	1.97325e-05	down	Myb factor protein.
Os01g0945300	2.83754	9.32096e-08	1.05822e-05	down	Amino acid/polyamine transporter I family protein.
Os09g0403300	2.30184	1.66092e-07	1.63521e-05	down	cytochrome P450.
Os04g0685000	2.6507	3.68737e-07	2.99071e-05	down	Protein of unknown function DUF623 plant domain containing protein.
Os02g0658800	2.63853	6.02655e-06	0.000271176	down	Beta-expansin.
Os04g0319700	3.1234	1.06505e-06	6.69496e-05	down	Glucosyltransferase (Fragment).
Os02g0733300	2.18803	4.44403e-08	5.89423e-06	down	Endo-beta-14-glucanase precursor (EC 3.2.1.4).
Os01g0868900	2.44527	9.19849e-10	2.31628e-07	down	predicted protein.
Os02g0826100	2.61661	5.13138e-12	3.23806e-08	down	RNA helicase (Fragment).
Os05g0382000	86.7	6.58429e-07	4.64017e-05	down	ABL164Cp.
Os06g0119300	2.51636	4.70054e-08	6.17379e-06	down	Protein of unknown function DUF594 family protein.
Os06g0300600	2.13668	4.38634e-07	3.40213e-05	down	Decoy.
Os03g0138700	2.2491	5.76824e-09	1.08101e-06	down	TGF-beta receptor type I/II extracellular region family protein.
Os08g0496000	3.59959	1.15095e-06	7.12566e-05	down	Cytochrome oxidase assembly family protein.
Os11g0549610	4.76676	6.15479e-06	0.000275743	down	Hypothetical conserved gene.
Os06g0267900	2.25911	2.07733e-07	1.93837e-05	down	NB-ARC domain containing protein.
Os05g0317900	3.46712	6.90696e-08	8.36492e-06	down	Resistance protein candidate (Fragment).
Os01g0138600	2.19842	1.1685e-06	7.20999e-05	down	phosphotransferase system PEP-utilising enzyme N-terminal domain containing protein.
Os09g0261900	3.58264	3.03529e-06	0.000153467	down	Hypothetical conserved gene.
Os01g0621600	3.14738	3.20758e-06	0.000160413	down	Serine/threonine protein kinase-related domain containing protein.
Os01g0672300	6.2968	6.92924e-06	0.000304375	down	Conserved hypothetical protein.
Os01g0282800	2.17177	9.19875e-06	0.000386583	down	Tubulin beta-5 chain (Beta-5 tubulin).
Os06g0671075	2.37003	4.16394e-08	5.58881e-06	down	Hypothetical gene.
Os03g0572925	2.1337	2.25175e-06	0.000120983	down	Hypothetical protein.
Os01g0652200	2.19525	7.71606e-12	4.0275e-08	down	Hypothetical protein.
Os04g0662800	2.35279	1.0679e-10	6.29703e-08	down	Regulator of chromosome condensation RCC1 domain containing protein.
Os12g0500700	2.06079	1.71268e-06	9.7091e-05	down	Vacuolar sorting protein-like%3B embryogenesis protein H beta 58-like protein.
Os04g0671500	2.11518	3.51784e-07	2.88517e-05	down	Hypothetical protein.
Os06g0566201	2.76643	4.57765e-10	1.3775e-07	down	Hypothetical gene.
Os09g0503400	2.10595	1.55957e-07	1.55975e-05	down	Valyl/Leucyl/Isoleucyl-tRNA synthetase class I anticodon-binding domain containing protein.
Os11g0657300	2.17697	9.18765e-09	1.61717e-06	down	Small nuclear ribonucleoprotein F (snRNP-F) (Sm protein F) (Sm-F) (SmF).
Os02g0568200	2.37266	4.1088e-08	5.53588e-06	down	NPH3 domain containing protein.
Os01g0775100	2.09162	4.69705e-09	9.08448e-07	down	Plus-3 domain containing protein.
Os06g0154600	2.23587	3.82142e-06	0.000185247	down	Dihydroneopterin aldolase.
Os05g0370650	2.742	1.31059e-06	7.88672e-05	down	Hypothetical protein.
Os06g0662200	3.23962	1.25491e-08	2.09958e-06	down	Basic leucine zipper (bZIP) transcription factor Negative regulator of cold and drought stress response
Os01g0518500	2.11469	2.4941e-07	2.22484e-05	down	Glycoside hydrolase family 27 protein.
Os04g0396800	2.63758	8.51216e-07	5.63535e-05	down	serine carboxypeptidase K10B2.2.
Os08g0260400	16.2041	1.94224e-08	3.01122e-06	down	Conserved hypothetical protein.
Os08g0499200	2.17273	2.7809e-07	2.41603e-05	down	Chloride channel protein CLC-f (AtCLC-f). Splice isoform 2.
Os01g0749900	2.48618	7.20677e-06	0.000314898	down	Protein of unknown function DUF250 domain containing protein.
Os04g0599000	2.32678	3.50036e-06	0.000172523	down	Serine/threonine protein kinase-related domain containing protein.
Os03g0297400	2.16437	1.05573e-08	1.81517e-06	down	Acyl transferase domain containing protein.
Os03g0831500	2.79366	6.24761e-08	7.71896e-06	down	Phosphoribosylformylglycinamidine cyclo-ligase chloroplast/mitochondrial precursor (EC 6.3.3.1) (AIRS) (Phosphoribosyl-aminoimidazole synthetase) (AIR synthase) (VUpur5).
Os05g0406100	2.21892	2.147e-07	1.98543e-05	down	Hypothetical conserved gene.
Os03g0246100	6.65158	7.11609e-08	8.58377e-06	down	Glycoside hydrolase family 17 protein.
Os05g0386201	2.1466	2.2665e-07	2.06788e-05	down	Zinc finger lateral root primordium type 1 domain containing protein.
Os08g0460900	2.048	4.78759e-06	0.000223946	down	Conserved hypothetical protein.
Os01g0837200	14.1449	2.80669e-07	2.43122e-05	down	esterase/lipase/thioesterase family protein.
Os09g0511500	3.95077	7.54739e-07	5.13429e-05	down	Zinc finger RING/FYVE/PHD-type domain containing protein.
Os04g0641000	2.5	5.42669e-07	4.0097e-05	down	DNA-directed RNA polymerase.
Os02g0667600	6.28053	6.25809e-07	4.47011e-05	down	Harpin-induced 1 domain containing protein.
Os01g0226666	5.39474	6.20731e-06	0.000277596	down	Hypothetical protein.
Os08g0113100	2.22898	1.11814e-07	1.21122e-05	down	cDNA clone:J023041C07 full insert sequence.
Os01g0814400	2.31167	4.2105e-11	4.68463e-08	down	91A protein (Fragment).
Os02g0194200	2.15263	5.13916e-07	3.847e-05	down	K Homology type 1 subgroup domain containing protein.
Os11g0243750	2.76501	4.49847e-06	0.000212314	down	NB-ARC domain containing protein expressed.
Os11g0673400	2.60147	5.84274e-11	5.0933e-08	down	Hypothetical gene.
Os09g0400000	2.03725	2.28095e-08	3.43556e-06	down	Cinnamyl alcohol dehydrogenase (EC 1.1.1.195).
Os11g0692000	2.31393	8.87734e-09	1.56974e-06	down	Hypothetical protein.
Os01g0547500	2.4498	5.11325e-12	3.23806e-08	down	Glycosyl hydrolase family 9 protein expressed.
Os05g0478000	2.20326	5.13406e-06	0.000237127	down	Zinc finger RING/FYVE/PHD-type domain containing protein.
Os02g0308800	2.08124	1.61998e-10	7.50178e-08	down	Conserved hypothetical protein.
Os11g0241700	2.09892	3.91125e-07	3.12538e-05	down	Protein of unknown function DUF538 family protein.
Os10g0203600	2.17438	1.48103e-06	8.64866e-05	down	DNA-binding SAP domain containing protein.
Os01g0144380	2.40581	4.10864e-06	0.000196348	down	Hypothetical gene.
Os01g0143300	2.49708	4.41033e-07	3.41635e-05	down	Glycine-rich protein (Fragment).
Os01g0108500	2.49377	2.46515e-07	2.20487e-05	down	Protein of unknown function DUF3778 domain containing protein.
Os03g0363500	2.67546	3.67503e-09	7.38178e-07	down	solute carrier family 2 facilitated glucose transporter member 8.
Os04g0413500	4.30523	8.40481e-06	0.000358719	down	Cell-wall invertase Carbon partitioning during early grain filling
Os02g0577900	2.90783	2.9135e-07	2.50314e-05	down	Conserved hypothetical protein.
Os07g0491800	2.07697	2.37957e-10	9.11306e-08	down	taxane 13-alpha-hydroxylase.
Os03g0221500	6.43796	1.38745e-06	8.23068e-05	down	Glycoside hydrolase family 17 protein.
Os01g0376700	3.26384	6.00875e-06	0.000270461	down	Sucrose-phosphatase (EC 3.1.3.24).
Os04g0453500	2.01534	4.71688e-07	3.59908e-05	down	Conserved hypothetical protein.
Os10g0184200	3.42466	5.3597e-13	1.33296e-08	down	Protein of unknown function DUF594 family protein.
Os08g0199000	3.44828	3.73061e-06	0.000181545	down	F-box domain cyclin-like domain containing protein.
Os03g0297400	3.01278	3.89528e-08	5.30227e-06	down	Acyl transferase domain containing protein.
Os06g0187000	3.37739	3.86982e-07	3.10106e-05	down	Non-protein coding transcript.
Os08g0178700	2.14686	8.42034e-11	5.71995e-08	down	Calmodulin-binding diacylglycerol kinase.
Os09g0124232	2.35627	7.54323e-07	5.13258e-05	down	Ankyrin repeat domain containing protein.
Os08g0245400	2.00134	5.91564e-11	5.12515e-08	down	Pyridoxal phosphate-dependent transferase major region subdomain 1 domain containing protein.
Os08g0537001	2.03048	7.22279e-09	1.3123e-06	down	Conserved hypothetical protein.
Os01g0183100	2.67955	4.98858e-11	4.79512e-08	down	Cytochrome cd1-nitrite reductase-like C-terminal haem d1 domain containing protein.
Os02g0192500	2.42353	1.51642e-07	1.52682e-05	down	cDNA clone:J033103E20 full insert sequence.
Os05g0395000	2.01565	5.69446e-08	7.17176e-06	down	Virulence factor pectin lyase fold family protein.
Os06g0601600	8.58434	1.57438e-07	1.57211e-05	down	Cellulose synthase domain containing protein.
Os05g0556300	2.19542	8.89115e-07	5.82443e-05	down	Uncharacterised protein family UPF0089 domain containing protein.
Os02g0252100	2.93217	2.24563e-12	2.27001e-08	down	SC35-like splicing factor SCL30 30 kD.
Os12g0512800	77.9	2.53e-06	0.000132696	down	Cytochrome P450 71E1 (EC 1.14.13.68) (4-hydroxyphenylacetaldehyde oxime monooxygenase).
Os01g0891100	2.14446	6.19126e-08	7.66501e-06	down	Polygalacturonase.
Os08g0501700	2.38497	3.11674e-07	2.63428e-05	down	Conserved hypothetical protein.
Os12g0613150	2.88083	2.99709e-06	0.000151972	down	Hypothetical protein.
Os09g0520400	17.7681	3.11914e-07	2.63433e-05	down	Hypothetical conserved gene.
Os07g0257200	2.24428	2.31787e-06	0.000123937	down	Manganese and Cadmium transporter Mn and Cd uptake
Os05g0197300	2.31073	3.00321e-10	1.07513e-07	down	IQ calmodulin-binding region domain containing protein.
Os03g0128000	2.28328	6.21341e-08	7.68568e-06	down	Fasciclin-like protein FLA2.
Os07g0514400	2.29178	6.5543e-06	0.000290228	down	Domain of unknown function DUF629 domain containing protein.
Os04g0581000	5.71111	1.75454e-06	9.89069e-05	down	Flavanone 3-hydroxylase (Fragment).
Os07g0406600	2.21125	2.31081e-10	8.99944e-08	down	DDHD domain containing protein.
Os09g0325100	2.09573	8.64792e-07	5.70576e-05	down	Conserved hypothetical protein.
Os03g0783700	2.15902	3.46304e-10	1.1725e-07	down	AP-1 complex subunit sigma-2.
Os01g0916600	3.05979	2.78846e-10	1.01109e-07	down	RNA recognition motif glycine rich protein domain containing protein.
Os12g0618400	2.24471	4.89972e-08	6.39368e-06	down	Hypothetical conserved gene.
Os09g0132200	8.67176	5.50746e-09	1.04183e-06	down	anther-specific proline-rich protein APG.
Os01g0880400	2.01789	5.00903e-06	0.000232466	down	Hypothetical gene.
Os11g0523110	2.41077	3.13124e-06	0.000157359	down	Alcohol dehydrogenase-like protein.
Os08g0485000	2.42369	1.86988e-11	4.17983e-08	down	PHI-1.
Os01g0602800	2.18667	7.63195e-08	9.09217e-06	down	Serine/threonine protein kinase-related domain containing protein.
Os01g0661700	89.5	2.14891e-07	1.98625e-05	down	Hypothetical gene.
Os04g0459700	9.48921	1.34399e-06	8.03298e-05	down	Nucleosome assembly protein (NAP) family protein.
Os10g0133500	2.09152	1.94891e-09	4.31403e-07	down	Transferase family protein.
Os08g0201500	3.59921	2.41352e-08	3.60697e-06	down	SHR5-receptor-like kinase (Fragment).
Os01g0704300	2.33734	6.52771e-08	7.99724e-06	down	Conserved hypothetical protein.
Os06g0148100	2.92494	3.16108e-07	2.66229e-05	down	Conserved hypothetical protein.
Os01g0804900	2.66667	9.85603e-06	0.000409215	down	Cytochrome P450.
Os04g0518400	3.01241	1.69915e-08	2.69765e-06	down	Phenylalanine ammonia-lyase (Fragment).
Os03g0683700	2.55462	2.07457e-07	1.93701e-05	down	Hypothetical conserved gene.
Os06g0492750	7.74689	2.93851e-11	4.28807e-08	down	Hypothetical protein.
Os05g0203912	2.09381	6.05837e-08	7.54468e-06	down	Histone deacetylase.
Os11g0291475	2.17538	6.0165e-09	1.11959e-06	down	Hypothetical protein.
Os08g0114300	2.36672	1.03528e-08	1.78437e-06	down	D-arabinono-14-lactone oxidase domain containing protein.
Os01g0310500	2.09136	5.62942e-07	4.12275e-05	down	Conserved hypothetical protein.
Os11g0165700	4.14734	6.72082e-07	4.71956e-05	down	Mannose-binding lectin domain containing protein.
Os06g0640100	2.13129	8.02446e-08	9.45294e-06	down	Cytochrome P450 CYP71Y10.
Os11g0482400	2.05219	9.37246e-12	4.17983e-08	down	Hypothetical conserved gene.
Os09g0539400	6.03652	5.11818e-10	1.48315e-07	down	MCM10 minichromosome maintenance deficient 10.
Os07g0256866	2.72166	2.30009e-06	0.000123111	down	Hypothetical gene.
Os03g0223000	2.10543	1.67441e-07	1.64442e-05	down	atypical receptor-like kinase MARK.
Os07g0293000	2.30516	2.25274e-08	3.40643e-06	down	Hypothetical conserved gene.
Os08g0416100	2.21068	4.1929e-09	8.2337e-07	down	DEAD-like helicase N-terminal domain containing protein.
Os01g0793300	11.2903	6.09182e-08	7.57518e-06	down	Di-copper centre-containing domain containing protein.
Os09g0441100	72.4	1.95066e-07	1.85289e-05	down	Cytochrome P450 monooxygenase CYP92A1.
Os04g0632750	18.6812	4.86949e-10	1.43769e-07	down	Hypothetical protein.
Os06g0481850	2.45306	1.02947e-10	6.16503e-08	down	Hypothetical conserved gene.
Os09g0482900	3.77112	4.44057e-08	5.89274e-06	down	UDP-glucuronosyl/UDP-glucosyltransferase family protein.
Os05g0517500	2.21739	6.96784e-08	8.42899e-06	down	Gamma-glutamyl hydrolase.
Os01g0660550	2.02028	2.07402e-06	0.00011335	down	Conserved hypothetical protein.
Os07g0510833	2.10325	1.17066e-06	7.2202e-05	down	L-ascorbate oxidase.
Os10g0445400	2.24	1.49045e-07	1.5097e-05	down	Zinc finger RING/FYVE/PHD-type domain containing protein.
Os03g0143700	2.156	7.70628e-06	0.000333143	down	Hypothetical conserved gene.
Os06g0676700	2.36889	5.30907e-07	3.94208e-05	down	High pI alpha-glucosidase.
Os05g0458000	2.07921	2.21688e-07	2.03667e-05	down	Zinc finger DHHC-type domain containing protein.
Os03g0103300	2.1274	3.31968e-09	6.78032e-07	down	Hybrid proline- or glycine-rich protein Controll of low-temperature germinability Pre-harvest sprouting resistance
Os09g0255900	4.24062	1.09977e-07	1.19684e-05	down	Protein of unknown function DUF247 plant family protein.
Os10g0557900	2.80223	4.94245e-06	0.00023012	down	Peptidase M10A and M12B matrixin and adamalysin family protein.
Os04g0169300	4.3549	1.02832e-07	1.13842e-05	down	Conserved hypothetical protein.
Os09g0526000	2.28373	2.87338e-08	4.15756e-06	down	Conserved hypothetical protein.
Os07g0474300	2.46802	5.13226e-07	3.84252e-05	down	Conserved hypothetical protein.
Os06g0153200	2.00022	1.41607e-06	8.37229e-05	down	phosphate translocator-related.
Os06g0213400	2.08148	8.96644e-06	0.000378298	down	Protein of unknown function DUF829 eukaryotic family protein.
Os12g0126000	2.7181	9.67745e-08	1.08665e-05	down	Multi antimicrobial extrusion protein MatE family protein.
Os04g0413500	4.87432	2.88444e-08	4.16785e-06	down	Cell-wall invertase Carbon partitioning during early grain filling
Os04g0560400	2.3113	1.12944e-07	1.22065e-05	down	Alpha-L-fucosidase 1.
Os01g0612900	2.076	1.80074e-07	1.74099e-05	down	Lipase GDSL domain containing protein.
Os02g0719600	3.11329	4.63262e-06	0.00021793	down	SAM dependent carboxyl methyltransferase family protein.
Os07g0554850	2.56893	8.00196e-09	1.43415e-06	down	Hypothetical protein.
Os10g0531300	3.65032	3.00281e-09	6.21419e-07	down	Glutathione transferase (EC 2.5.1.18).
Os01g0598900	2.0003	8.10862e-07	5.42272e-05	down	Cytoplasmic tRNA 2-thiolation protein 1.
Os06g0653100	2.87685	3.43328e-07	2.83341e-05	down	Senescence-associated protein 5.
Os07g0160300	2.4396	8.5138e-07	5.63535e-05	down	Shikimate kinase domain containing protein.
Os07g0568650	2.07253	8.55721e-06	0.000363937	down	Hypothetical protein.
Os04g0463000	3.97636	1.3092e-07	1.36335e-05	down	Serine/threonine protein kinase domain containing protein.
Os04g0528300	2.01931	1.334e-10	6.86134e-08	down	OSIGBa0115K01-H0319F09.18 protein.
Os11g0166201	3.60506	4.14621e-08	5.56855e-06	down	BZIP transcription factor family protein expressed.
Os04g0604300	3.9466	2.23524e-07	2.04681e-05	down	Xyloglucan endotransglucosylase/hydrolase protein 24 precursor (EC 2.4.1.207) (At-XTH24) (XTH-24) (Meristem protein 5) (MERI-5 protein) (MERI5 protein) (Endo-xyloglucan transferase) (Xyloglucan endo-14-beta-D-glucanase).
Os02g0667050	2.16481	1.17589e-06	7.24406e-05	down	Hypothetical gene.
Os10g0548700	7.44915	8.73481e-06	0.000370005	down	Hypothetical conserved gene.
Os05g0575400	2.5277	1.47884e-08	2.40292e-06	down	Cyclin-like F-box domain containing protein.
Os12g0180100	2.37253	2.94064e-06	0.000149666	down	inorganic phosphate cotransporter.
Os07g0628900	2.21439	5.81533e-09	1.08858e-06	down	KI domain interacting kinase 1.
Os08g0461300	2.73558	1.61335e-07	1.60232e-05	down	Cyclin-like F-box domain containing protein.
Os12g0176700	2.01892	1.20535e-07	1.28149e-05	down	SWIRM domain containing protein expressed.
Os01g0702400	2.59778	1.16119e-10	6.63761e-08	down	WD40/YVTN repeat-like domain containing protein.
Os10g0195050	9.06627	1.04089e-07	1.1486e-05	down	Hypothetical protein.
Os08g0200750	2.62091	2.1811e-07	2.01035e-05	down	Hypothetical protein.
Os02g0640100	2.74986	1.48141e-07	1.5027e-05	down	Hypothetical conserved gene.
Os03g0320600	102.9	3.29605e-08	4.64672e-06	down	VQ domain containing protein.
Os03g0650200	2.91767	1.15793e-07	1.24412e-05	down	Cytochrome P450 CYP92C5.
Os04g0672700	3.37322	1.9898e-12	2.27001e-08	down	Pentatricopeptide repeat domain containing protein.
Os07g0455100	2.16299	1.51528e-07	1.52608e-05	down	Tetratricopeptide repeat domain containing protein Control of Aus-japonica/indica hybrid female sterility
Os10g0167300	2.05848	2.12601e-09	4.6285e-07	down	Enolase 2 (EC 4.2.1.11) (2-phosphoglycerate dehydratase 2) (2-phospho- D-glycerate hydro-lyase 2).
Os03g0773100	3.01448	9.50417e-08	1.07326e-05	down	Myb/SANT domain protein.
Os06g0202400	2.15877	5.84864e-07	4.25116e-05	down	Conserved hypothetical protein.
Os06g0499301	2.27457	4.53799e-10	1.36751e-07	down	Pentatricopeptide repeat domain containing protein.
Os11g0687100	4.86545	9.59593e-07	6.18549e-05	down	von Willebrand factor type A domain containing protein.
Os05g0187100	2.00776	1.78154e-07	1.72638e-05	down	Cytosolic hexokinase Sugar signaling and metabolism
Os12g0486800	3.65721	5.02656e-06	0.000233101	down	Hypothetical protein.
Os01g0679550	2.64585	1.62212e-07	1.60754e-05	down	Aspartic proteinase nepenthesin-2.
Os04g0619300	2.3791	2.77315e-07	2.41296e-05	down	L1332.8 protein.
Os07g0598200	2.00856	5.09799e-09	9.73084e-07	down	Circadian clock coupling factor ZGT.
Os03g0388300	8.92357	2.03337e-06	0.000111561	down	Conserved hypothetical protein.
Os02g0115700	2.48037	3.14691e-08	4.47522e-06	down	Catalase.
Os11g0108650	2.0399	1.21912e-08	2.04943e-06	down	Laccase-23.
Os01g0936700	3.56575	1.64275e-07	1.62162e-05	down	Hypothetical gene.
Os02g0534000	3.89524	1.24771e-06	7.59351e-05	down	OSIGBa0134P10.7 protein.
Os06g0158000	2.95792	5.37232e-07	3.977e-05	down	Acyl-CoA synthetase (EC 6.2.1.3).
Os02g0794500	2.27103	4.3976e-09	8.57594e-07	down	serine carboxypeptidase K10B2.2.
Os02g0570700	4.88755	9.58141e-06	0.000399841	down	Cytochrome P450 family protein.
Os03g0824100	2.00175	3.25605e-07	2.72222e-05	down	Pentatricopeptide repeat protein Regulation of chloroplast development
Os10g0465000	2.07856	5.51043e-10	1.5636e-07	down	Conserved hypothetical protein.
Os03g0172000	2.1157	5.55089e-09	1.04864e-06	down	predicted protein.
Os05g0322900	2.33775	6.59293e-11	5.53269e-08	down	WRKY transcription factor 45.
Os07g0658600	2.27776	2.20938e-07	2.03022e-05	down	Nucleoid DNA-binding-like protein.
Os12g0484600	2.6468	2.94328e-08	4.24272e-06	down	Nodulin-like domain containing protein.
Os09g0570400	2.28719	2.28544e-09	4.90238e-07	down	Non-protein coding transcript.
Os05g0177900	5.30566	5.72483e-07	4.17959e-05	down	Conserved hypothetical protein.
Os03g0281800	2.08052	8.95096e-09	1.57946e-06	down	Conserved hypothetical protein.
Os05g0104650	2.5291	9.13113e-08	1.04255e-05	down	Formylglycinamide ribonucleotide amidotransferase (Fragment).
Os05g0350900	2.32898	1.5093e-08	2.44396e-06	down	Hypothetical conserved gene.
Os06g0148200	8.75168	2.00663e-07	1.89076e-05	down	Non-protein coding transcript.
Os02g0493087	2.02511	8.54286e-06	0.000363473	down	Hypothetical protein.
Os06g0338200	2.62939	2.51464e-11	4.28807e-08	down	Copper amine oxidase family protein.
Os04g0208200	2.39235	9.73662e-06	0.000405092	down	Cysteine proteinase.
Os09g0370500	2.60947	5.19038e-09	9.87159e-07	down	VQ domain containing protein.
Os09g0275400	2.97622	2.49378e-08	3.70075e-06	down	Cytochrome P450 family protein.
Os07g0619400	2.19817	3.73632e-10	1.21536e-07	down	EF-Hand type domain containing protein.
Os01g0681000	2.00845	6.30716e-06	0.000281555	down	Uncharacterised protein family UPF0089 domain containing protein.
Os09g0457833	3.32523	7.21791e-06	0.000315319	down	Hypothetical gene.
Os03g0297600	2.05728	4.33925e-10	1.3189e-07	down	Streptomyces cyclase/dehydrase family protein.
Os10g0495900	2.60303	1.66828e-06	9.51353e-05	down	Protein of unknown function DUF1218 family protein.
Os01g0265400	85.9	5.37417e-07	3.97715e-05	down	Conserved hypothetical protein.
Os06g0326500	2.02775	1.0562e-07	1.16048e-05	down	mitochondrial glycoprotein.
Os02g0800800	2.45219	2.84932e-07	2.45951e-05	down	Conserved hypothetical protein.
Os11g0156300	2.11944	1.7054e-08	2.70452e-06	down	Protein of unknown function DUF623 plant domain containing protein.
Os05g0460700	5.15746	6.52384e-07	4.61085e-05	down	Ribosomal protein L17 family protein.
Os01g0225200	2.19034	3.41372e-10	1.16376e-07	down	predicted protein.
Os06g0587900	4.4335	1.48348e-07	1.50444e-05	down	Hypothetical conserved gene.
Os12g0431100	2.71576	3.47511e-07	2.86041e-05	down	ATPase AAA-type core domain containing protein.
Os11g0585700	3.33565	6.17766e-07	4.42687e-05	down	50S ribosomal protein L4.
Os04g0419800	3.65823	7.25401e-08	8.72476e-06	down	Hypothetical conserved gene.
Os12g0634800	2.83015	1.48898e-06	8.68913e-05	down	Protein of unknown function NUC189 C-terminal domain containing protein.
Os02g0106600	2.02811	3.84805e-06	0.000186231	down	Zinc finger RING/FYVE/PHD-type domain containing protein.
Os04g0508900	3.60142	9.3888e-07	6.08528e-05	down	OSIGBa0101P20.13 protein.
Os05g0282900	2.26607	3.33419e-08	4.67859e-06	down	Conserved hypothetical protein.
Os02g0453500	2.00837	3.90932e-08	5.31625e-06	down	mitochondrial glycoprotein.
Os05g0443400	2.19997	3.45481e-11	4.39958e-08	down	Glucan endo-13-beta-glucosidase 7.
Os01g0282800	2.39476	1.42282e-09	3.29618e-07	down	Tubulin beta-5 chain (Beta-5 tubulin).
Os01g0165800	2.0295	1.93211e-10	8.43331e-08	down	DNA-binding HORMA domain containing protein.
Os09g0474100	2.00538	5.89057e-07	4.27402e-05	down	TA1 protein (Fragment).
Os03g0399400	9.26891	5.24035e-06	0.000241216	down	Cyclin-like F-box domain containing protein.
Os03g0622700	2.31086	3.20889e-07	2.69344e-05	down	Plastidic phosphate translocator-like protein1.
Os12g0177800	6.61677	2.02525e-06	0.000111289	down	D-mannose binding lectin family protein expressed.
Os10g0486100	2.04106	8.58894e-08	9.95427e-06	down	Cytochrome P450-like protein (CYP86B1).
Os02g0597800	2.50806	2.31605e-10	9.00829e-08	down	Nuclear hormone receptor ligand-binding domain containing protein.
Os04g0556600	2.11747	1.08496e-08	1.8609e-06	down	cis-Zeatin-O-glucosyltransferase Catalyze O-glucosylation of cZ and cZ-riboside
Os03g0253100	3.95647	3.30029e-11	4.30658e-08	down	Phosphomevalonate kinase ERG8 domain containing protein.
Os04g0411100	3.24651	2.68987e-08	3.94467e-06	down	Conserved hypothetical protein.
Os11g0180600	60.2	3.11825e-06	0.000156819	down	Type III restriction enzyme res subunit family protein expressed.
Os03g0770700	78.4	2.55908e-06	0.000133955	down	Hypothetical conserved gene.
Os11g0138700	2.24338	9.93951e-07	6.35272e-05	down	Kelch-type beta propeller domain containing protein.
Os03g0149700	2.17705	3.94227e-11	4.57594e-08	down	Zinc finger RING/FYVE/PHD-type domain containing protein.
