# Supplementary material for: Global N6-Methyladenosine Profiling Revealed the Tissue-Specific Epitranscriptomic Regulation of Rice Responses to Salt Stress
Source: Int J Mol Sci. 2022 Feb 14;23(4):2091. doi: 10.3390/ijms23042091 (PMC8875919; doi:10.3390/ijms23042091)
Supplement: Supplementary file 1 [file ijms-23-02091-s001.zip › Table S3_List of genes with up-regulated m6A methylation in roots under salt stress.xlsx]

## Sheet: Table Sx
Table S3_List of genes with up-regulated m6A methylation in roots under salt stress
GeneName	Foldchange	P_value	FDR	Regulation	description
Os03g0828300	2.55738	1.48209e-08	5.03404e-06	up	(1-4)-beta-mannan endohydrolase-like protein.
Os02g0782500	37.1463	5.63506e-12	3.93313e-08	up	17.5 kDa class II heat shock protein.
Os06g0573900	11.6214	3.80431e-08	1.00914e-05	up	1-aminocyclopropane-1-carboxylic acid oxidase.
Os07g0638400	2.51472	1.62248e-06	0.000154792	up	1-Cys peroxiredoxin.
Os07g0638400	2.82116	5.61258e-07	6.86425e-05	up	1-Cys peroxiredoxin.
Os05g0517900	2.14657	6.34037e-07	7.49785e-05	up	2 3 cyclic phosphodiesteraseplant domain containing protein.
Os05g0482700	2.03794	1.02288e-06	0.000108189	up	3-bisphosphoglycerate-independent phosphoglycerate mutase (EC 5.4.2.1) (Phosphoglyceromutase) (BPG-independent PGAM) (PGAM-I).
Os08g0485400	3.92084	9.16391e-06	0.000624977	up	2-nitropropane dioxygenase-like protein.
Os11g0437800	13.5536	8.70062e-14	1.09837e-08	up	2OG-Fe(II) oxygenase domain containing protein.
Os03g0844450	2.00247	4.66652e-06	0.000359307	up	3' exoribonuclease family domain 1-containing protein.
Os11g0591200	2.2785	3.90595e-06	0.000311517	up	3-ketoacyl-CoA synthase.
Os10g0545200	2.87484	5.93439e-07	7.15444e-05	up	4-dimethyl-sterol C4-methyl-oxidase (Fragment).
Os10g0545200	7.5847	1.36037e-06	0.000134906	up	4-dimethyl-sterol C4-methyl-oxidase (Fragment).
Os02g0255200	2.04135	5.89265e-07	7.11239e-05	up	40S ribosomal protein S15a.
Os04g0432300	2.56569	9.68095e-06	0.000653575	up	4-alpha-L-fucosyltransferase.
Os04g0432300	3.36852	1.8922e-07	3.09807e-05	up	4-alpha-L-fucosyltransferase.
Os10g0578950	2.91093	1.78717e-06	0.000167007	up	4-coumarate--CoA ligase-like 2.
Os08g0243100	2.23292	9.82855e-06	0.000661816	up	4'-phosphopantetheinyl transferase domain containing protein.
Os05g0541900	3.11011	2.32204e-08	7.03437e-06	up	60S ribosomal protein l28.
Os03g0760800	3.81918	6.94076e-07	8.02605e-05	up	A member of the GAST (gibberellin (GA)-Stimulated Transcript) familyControl of seedling growth and &alpha%3B-amylase expressionCell proliferation in meristems and panicles development
Os03g0436400	2.325	3.14506e-06	0.00026223	up	A.thaliana gene induced upon wounding stress.
Os01g0615500	6.32827	1.07291e-07	2.0726e-05	up	ABC transporter-like domain containing protein.
Os02g0208300	3.16656	6.58752e-07	7.7328e-05	up	ABC-2 type transporter domain containing protein.
Os08g0467500	3.18993	3.36785e-08	9.28105e-06	up	Abscisic acid and stress inducible (A22) gene.
Os08g0533300	176.9	4.32835e-09	1.98131e-06	up	ACR5.
Os02g0663800	2.57075	1.78862e-07	2.98344e-05	up	Actin-depolymerizing factor (ADF).
Os03g0243100	2.2699	1.14255e-09	7.04595e-07	up	Actin-depolymerizing factor 5 (ADF-5) (AtADF5).
Os03g0741000	2.86222	3.54101e-06	0.000287835	up	Acyl-[acyl-carrier protein] desaturase.
Os01g0681200	2.69079	4.2506e-09	1.95652e-06	up	Acyl-CoA synthetase (EC 6.2.1.3).
Os02g0613900	2.41537	1.84992e-08	5.89252e-06	up	adenine phosphoribosyltransferase 2.
Os07g0509800	2.88727	1.10998e-06	0.000115372	up	adenosine 5'-phosphosulfate reductase 2.
Os11g0525800	2.91749	2.72206e-07	4.03612e-05	up	ADL308Cp.
Os11g0525800	2.03528	2.10309e-06	0.000189733	up	ADL308Cp.
Os04g0466600	2.41215	1.76651e-07	2.95051e-05	up	Agmatine deiminase domain containing protein.
Os11g0523110	4.79273	2.09084e-06	0.00018908	up	Alcohol dehydrogenase-like protein.
Os11g0523110	2.39777	5.05613e-06	0.000383297	up	Alcohol dehydrogenase-like protein.
Os04g0540600	5.99072	1.08137e-07	2.08203e-05	up	Aldehyde dehydrogenase domain containing protein.
Os07g0125000	2.40678	7.54748e-07	8.52892e-05	up	Allergen V5/Tpx-1 related family protein.
Os07g0125600	2.52944	1.94834e-06	0.000179083	up	Allergen V5/Tpx-1 related family protein.
Os07g0126401	2.43017	1.12722e-06	0.000116751	up	Allergen V5/Tpx-1 related family protein.
Os02g0787000	2.9705	6.56065e-09	2.71542e-06	up	Allergen V5/Tpx-1 related family protein.
Os05g0476400	9.00806	2.9831e-11	8.30308e-08	up	allergen-related.
Os11g0255500	4.80536	1.10024e-06	0.000114657	up	Allyl alcohol dehydrogenase%3B NADP-dependent oxidoreductase-like protein.
Os12g0227400	7.32264	1.69641e-08	5.48357e-06	up	Allyl alcohol dehydrogenase.
Os12g0227400	2.61343	9.42614e-07	0.000101624	up	Allyl alcohol dehydrogenase.
Os01g0317800	3.0331	1.57278e-06	0.000151128	up	Alpha/beta hydrolase family protein.
Os01g0636400	5.29808	1.88652e-07	3.09475e-05	up	Alpha/beta hydrolase family protein.
Os10g0532200	7.2854	7.97164e-09	3.17887e-06	up	Alpha/beta hydrolase family protein.
Os10g0532200	14	5.81935e-07	7.04854e-05	up	Alpha/beta hydrolase family protein.
Os01g0636400	19.6809	9.9984e-06	0.000671835	up	Alpha/beta hydrolase family protein.
Os10g0498100	4.19169	6.64789e-07	7.77066e-05	up	Alpha/beta hydrolase fold-1 domain containing protein.
Os10g0498100	5.38086	1.74391e-07	2.92691e-05	up	Alpha/beta hydrolase fold-1 domain containing protein.
Os01g0595600	2.43243	8.14251e-06	0.000568213	up	Alpha/beta hydrolase fold-1 domain containing protein.
Os03g0719400	2.31254	3.41573e-06	0.000280345	up	Alpha/beta hydrolase fold-1 domain containing protein.
Os10g0521400	2.46821	4.03107e-07	5.36859e-05	up	Alpha/beta hydrolase fold-1 domain containing protein.
Os07g0643000	4.90571	9.6612e-06	0.000652454	up	Alpha/beta hydrolase fold-3 domain containing protein.
Os02g0267200	2.76587	1.31247e-07	2.39401e-05	up	Alpha-expansin OsEXPA13.
Os03g0155900	14.1136	2.38287e-07	3.671e-05	up	Alpha-expansin OsEXPA18.
Os03g0155900	13.0226	2.0237e-08	6.34311e-06	up	Alpha-expansin OsEXPA18.
Os03g0156000	19.7391	1.30364e-08	4.57014e-06	up	Alpha-expansin OsEXPA19.
Os03g0155300	6.54324	3.50846e-09	1.69585e-06	up	Alpha-expansin precursor.
Os07g0679300	4.27778	9.11747e-07	9.88555e-05	up	Alpha-galactosidase precursor (EC 3.2.1.22) (Melibiase) (Alpha-D- galactoside galactohydrolase).
Os10g0492900	8.88	8.34932e-08	1.7296e-05	up	alpha-galactosidase.
Os10g0492900	4.9452	2.71547e-07	4.02923e-05	up	alpha-galactosidase.
Os10g0492900	93.5	6.90912e-07	8.00334e-05	up	alpha-galactosidase.
Os05g0159300	2.63312	3.76228e-07	5.11743e-05	up	Alpha-L-fucosidase 2.
Os11g0131900	2.0227	1.69942e-07	2.87661e-05	up	alpha-N-arabinofuranosidase A.
Os07g0134000	2.47113	2.47203e-10	2.36223e-07	up	Amino acid permease 6.
Os06g0556000	2.78996	5.51801e-07	6.77256e-05	up	Amino acid permeaseTransport of amino acids
Os06g0556000	4.32904	6.21929e-07	7.39397e-05	up	Amino acid permeaseTransport of amino acids
Os02g0727100	2.75498	7.19014e-07	8.22598e-05	up	Amino acid transportertransmembrane domain containing protein.
Os03g0326200	2.10726	1.46869e-06	0.000143321	up	aminophospholipid ATPase.
Os03g0838400	2.63692	1.10806e-08	4.04521e-06	up	Ammonium transporter.
Os07g0193200	79.9	5.49859e-06	0.000411582	up	Ankyrin repeat containing protein.
Os01g0948900	2.29025	1.53865e-06	0.000148571	up	Ankyrin repeat containing protein.
Os12g0118800	2.94562	4.28577e-06	0.000335994	up	Ankyrin repeat containing protein.
Os05g0129400	4.44418	3.9483e-07	5.28892e-05	up	Ankyrin repeat containing protein.
Os09g0331600	8.02857	4.16348e-11	1.00976e-07	up	Ankyrin repeat domain containing protein.
Os12g0178300	13.7897	1.37715e-08	4.77539e-06	up	ankyrin-like protein.
Os02g0732800	3.4593	5.20578e-06	0.000392466	up	Anther-specific proline-rich protein APG.
Os02g0732800	5.84516	6.433e-11	1.25937e-07	up	Anther-specific proline-rich protein APG.
Os10g0481100	5.83775	3.26501e-06	0.000270059	up	Aquaporin (Fragment).
Os02g0761200	2.25082	2.21091e-06	0.000197034	up	Armadillo-like helical domain containing protein.
Os01g0259400	2.42659	2.45512e-07	3.74199e-05	up	Armadillo-type fold domain containing protein.
Os03g0154000	2.815	3.74375e-10	3.03246e-07	up	Aromatic-ring hydroxylase family protein.
Os03g0154100	13.0526	4.74394e-08	1.17318e-05	up	Aromatic-ring hydroxylase family protein.
Os02g0102300	2.58982	1.28398e-09	7.75101e-07	up	Arsenate reductaseSulfurtransferase/rhodanese-like proteinRegulation of arsenic accumulation
Os11g0295900	9.23926	2.04003e-07	3.26786e-05	up	ASGR-BBM-like1.
Os03g0612400	2.56653	1.69484e-07	2.87246e-05	up	ASL1.
Os09g0453800	2.24162	4.26712e-06	0.000334911	up	Asparate aminotransferase.
Os06g0548000	3.98197	1.25814e-08	4.45203e-06	up	Aspartate aminotransferase (EC 2.6.1.1).
Os01g0927900	5.76998	7.56412e-07	8.5454e-05	up	Aspartate kinase precursor (EC 2.7.2.4).
Os01g0631900	94.8	5.71329e-07	6.9546e-05	up	aspartic proteinase oryzasin-1.
Os10g0572900	10.831	9.19196e-06	0.000626478	up	AT-hook protein 1.
Os09g0376700	2.87353	6.59723e-07	7.73762e-05	up	ATL family protein containing RING-H2 finger motif
Os05g0353500	2.82688	8.61691e-06	0.000594812	up	ATP binding protein.
Os01g0832900	2.66575	8.99653e-07	9.78477e-05	up	ATP binding protein.
Os08g0120200	2.62896	2.13536e-06	0.000191934	up	ATPaseAAA+ typecore domain containing protein.
Os05g0384600	5.22869	1.24372e-07	2.30268e-05	up	ATPasecoupled to transmembrane movement of substances.
Os11g0177400	2.82572	3.52854e-06	0.000287402	up	ATPasecoupled to transmembrane movement of substances.
Os05g0384600	4.69733	6.98457e-07	8.05972e-05	up	ATPasecoupled to transmembrane movement of substances.
Os02g0714300	2.28603	1.85648e-06	0.000172128	up	AT-rich interaction region domain containing protein.
Os01g0952500	3.8593	5.38006e-08	1.28158e-05	up	A-type response regulatorCytokinin signaling
Os01g0952500	2.70899	4.76977e-06	0.000365722	up	A-type response regulatorCytokinin signaling
Os01g0952500	2.26322	3.47782e-10	2.86771e-07	up	A-type response regulatorCytokinin signaling
Os04g0673300	3.03175	5.04111e-07	6.33357e-05	up	A-type response regulatorCytokinin signaling
Os01g0191800	3.36194	5.08849e-06	0.000385375	up	Aurora kinase.
Os09g0497700	2.01053	1.97641e-08	6.21591e-06	up	Autophagy protein 16 domain containing protein.
Os03g0797800	3.85696	2.46232e-06	0.000214308	up	AUX/IAA protein family protein.
Os02g0723400	4.60876	2.09963e-09	1.13233e-06	up	AUX/IAA protein family protein.
Os06g0660200	2.89807	1.20722e-11	5.10878e-08	up	Auxin efflux transporterPolar auxin transportControl of canopy architecture
Os06g0660200	3.46137	1.38743e-06	0.000137033	up	Auxin efflux transporterPolar auxin transportControl of canopy architecture
Os04g0608300	4.19097	4.22276e-09	1.94803e-06	up	Auxin responsive SAUR protein domain containing protein.
Os04g0662200	3.41048	4.10113e-09	1.90463e-06	up	Auxin responsive SAUR protein family protein.
Os11g0673200	2.29838	9.77231e-06	0.000658873	up	Auxin-induced beta-glucosidase.
Os02g0228900	2.71089	1.04359e-08	3.85397e-06	up	Auxin-responsive protein IAA18 (Indoleacetic acid-induced protein 18).
Os02g0228900	2.72146	1.92459e-07	3.13839e-05	up	Auxin-responsive protein IAA18 (Indoleacetic acid-induced protein 18).
Os06g0597000	2.53852	2.21919e-07	3.48583e-05	up	Auxin-responsive protein IAA23.
Os07g0646800	3.67088	1.44414e-07	2.57248e-05	up	Avr9/Cf-9 rapidly elicited protein 231.
Os05g0381400	11.1624	4.21711e-08	1.08226e-05	up	AWPM-19-like proteinStress tolerance through ABA-dependent patheway
Os01g0924933	6.51086	1.41581e-11	5.65585e-08	up	BAHD/HXXXD acyltransferase (class V)Polymerized protective layer synthesis of anther cuticle and pollen wall
Os03g0126700	3.34128	2.68013e-07	3.9925e-05	up	Barley stem rust resistance protein.
Os11g0592000	4.08012	1.58683e-06	0.000152056	up	Barwin.
Os05g0246300	11.5413	5.22493e-06	0.000393695	up	Barwin-related endoglucanase domain containing protein.
Os05g0246300	127.6	1.62731e-11	5.90332e-08	up	Barwin-related endoglucanase domain containing protein.
Os03g0259100	7.22105	6.43859e-08	1.44776e-05	up	Basic blue protein (Cusacyanin) (Plantacyanin) (CBP).
Os06g0653200	3.26727	5.73404e-06	0.000425967	up	Basic helix-loop-helix dimerisation region bHLH domain containing protein.
Os06g0724800	2.14004	4.21187e-07	5.54527e-05	up	Basic helix-loop-helix dimerisation region bHLH domain containing protein.
Os06g0710700	2.65332	1.58924e-10	1.94301e-07	up	Benzoyl coenzyme A: benzyl alcohol benzoyl transferase (Benzoyl- CoA:benzyl alcohol/phenylethanol benzoyltransferase).
Os06g0710700	3.82836	8.89317e-08	1.81367e-05	up	Benzoyl coenzyme A: benzyl alcohol benzoyl transferase (Benzoyl- CoA:benzyl alcohol/phenylethanol benzoyltransferase).
Os01g0801500	3.26928	3.08506e-06	0.000258161	up	Beta-1,3-glucanase precursor.
Os03g0792800	3.1745	2.75324e-06	0.000235381	up	Beta-1,3-glucanase-like protein.
Os01g0243700	2.30156	3.65139e-07	4.99398e-05	up	Beta-1,3-glucanase-like protein.
Os03g0792800	3.1102	3.28297e-07	4.61065e-05	up	Beta-1,3-glucanase-like protein.
Os03g0141200	4.92077	2.34645e-07	3.62971e-05	up	Beta-amylase PCT-BMYI (EC 3.2.1.2).
Os10g0465700	3.26916	8.44841e-07	9.33338e-05	up	Beta-amylase PCT-BMYI (EC 3.2.1.2).
Os03g0141200	4.27891	2.33518e-06	0.000205486	up	Beta-amylase PCT-BMYI (EC 3.2.1.2).
Os03g0125100	2.32998	6.3949e-07	7.55373e-05	up	Beta-carotene hydroxylaseDrought and oxidative stress resistance
Os11g0297800	2.02518	5.65191e-06	0.000420973	up	Beta-D-xylosidase.
Os10g0555600	3.87408	2.55763e-10	2.39437e-07	up	Beta-expansin precursor.
Os02g0658800	4.93369	3.04538e-08	8.63288e-06	up	Beta-expansin.
Os01g0580200	5.09538	3.71088e-06	0.000299181	up	Beta-galactosidase precursor (EC 3.2.1.23) (Lactase).
Os03g0255100	2.90774	8.84941e-07	9.67723e-05	up	Beta-galactosidase.
Os03g0255100	2.47458	3.41883e-07	4.74521e-05	up	Beta-galactosidase.
Os03g0255100	2.52483	5.58671e-07	6.84067e-05	up	Beta-galactosidase.
Os05g0366000	2.21896	1.5676e-06	0.00015077	up	Beta-glucosidase 21.
Os05g0366000	5.07672	7.19321e-06	0.000512136	up	Beta-glucosidase 21.
Os03g0703100	2.22754	1.98733e-07	3.20199e-05	up	beta-glucosidase.
Os03g0703100	2.3453	6.00401e-07	7.21112e-05	up	beta-glucosidase.
Os08g0225000	2.09337	3.85241e-06	0.00030834	up	beta-hydroxyacyl-ACP dehydratase.
Os08g0225000	2.31191	2.76255e-07	4.07574e-05	up	beta-hydroxyacyl-ACP dehydratase.
Os07g0485100	2.06378	3.66067e-07	5.00219e-05	up	Beta-ureidopropionase (EC 3.5.1.6) (Beta-alanine synthase) (N- carbamoyl-beta-alanine amidohydrolase).
Os07g0193800	2.2724	4.9343e-06	0.000375894	up	BHLH transcription factor (Fragment).
Os06g0184000	6.37437	1.98273e-07	3.19954e-05	up	BHLH transcription factor.
Os07g0198300	2.0271	6.25931e-06	0.000458555	up	Bifunctional inhibitor/plant lipid transfer protein/seed storage domain containing protein.
Os09g0472900	4.52391	1.81434e-07	3.00993e-05	up	Blight-associated protein p12 precursor.
Os09g0472700	9.13884	8.7886e-08	1.79726e-05	up	blight-associated protein p12.
Os01g0124401	7.61173	6.67861e-07	7.79071e-05	up	Bowman-Birk type bran trypsin inhibitor.
Os09g0298200	4.62264	2.59891e-06	0.000224266	up	Brittle 2.
Os03g0416200	2.43711	1.7902e-06	0.000167175	up	BRITTLE CULM1.
Os04g0527400	4.26432	8.02918e-08	1.68091e-05	up	BRO1 domain containing protein.
Os06g0184500	2.75914	1.92482e-06	0.000177353	up	BTB domain containing protein.
Os12g0613250	2.46072	4.99259e-09	2.18873e-06	up	BTB/POZ%3B Superoxide dismutasecopper/zinc binding%3B NPH3.
Os07g0124300	7.45098	3.52725e-07	4.86337e-05	up	bZIP transcription factor family protein.
Os01g0867300	3.69678	1.79208e-07	2.986e-05	up	bZIP transcription factorAbiotic stress responseABA signalingSuppressor of floral transition upon drought stress
Os01g0867300	2.59655	1.8246e-07	3.01957e-05	up	bZIP transcription factorAbiotic stress responseABA signalingSuppressor of floral transition upon drought stress
Os01g0867300	2.28557	3.32063e-07	4.64623e-05	up	bZIP transcription factorAbiotic stress responseABA signalingSuppressor of floral transition upon drought stress
Os02g0766700	2.12576	1.46059e-09	8.54358e-07	up	bZIP transcription factorRegulation of ABA signaling and biosynthesisDrought resistance
Os02g0766700	3.30599	1.55173e-07	2.6915e-05	up	bZIP transcription factorRegulation of ABA signaling and biosynthesisDrought resistance
Os10g0531900	3.61892	1.32429e-06	0.00013215	up	BZIP-like protein.
Os05g0219900	2.48185	4.18311e-07	5.51494e-05	up	C4-dicarboxylate transporter/malic acid transport protein family protein.
Os03g0832200	79.1	5.70927e-06	0.000424407	up	Calcium-binding protein precursor (Calreticulin).
Os06g0254700	2.45308	5.90121e-10	4.23079e-07	up	Caleosin related family protein.
Os06g0254700	2.1283	1.57833e-06	0.000151406	up	Caleosin related family protein.
Os03g0648300	2.01011	5.22769e-07	6.51722e-05	up	Calmodulin binding protein.
Os01g0134700	2.27019	6.93337e-07	8.02074e-05	up	Calmodulin binding protein-like family protein.
Os12g0630600	3.73254	1.00687e-09	6.41433e-07	up	Carbohydrate/puine kinasePfkBconserved site containing protein.
Os01g0105900	2.08879	2.55708e-11	7.46816e-08	up	Carbohydrate/purine kinase domain containing protein.
Os04g0412700	5.54335	6.17654e-08	1.40513e-05	up	Carbonic anhydraseeukaryotic family protein.
Os05g0113300	2.51111	1.61293e-08	5.32154e-06	up	Cation/H+ exchanger domain containing protein.
Os05g0113300	2.10146	6.09278e-08	1.38989e-05	up	Cation/H+ exchanger domain containing protein.
Os05g0594200	6.40886	1.81248e-09	1.01032e-06	up	Cation/proton exchanger 1a.
Os05g0594200	3.38675	6.69362e-06	0.000483034	up	Cation/proton exchanger 1a.
Os01g0270300	2.19729	6.77966e-07	7.88027e-05	up	Cationic peroxidase isozyme 40K precursor.
Os07g0677600	3.41944	3.50092e-07	4.84131e-05	up	Cationic peroxidase.
Os09g0418000	3.12636	1.96451e-10	2.10283e-07	up	CBL-interacting protein kinase 16.
Os01g0206300	3.99132	5.83863e-07	7.0657e-05	up	CBL-interacting protein kinase 18.
Os12g0124700	2.46056	8.97426e-06	0.00061386	up	CDC45-like protein family protein.
Os11g0601950	8.08571	5.37077e-08	1.2801e-05	up	cDNA clone:002-114-B06full insert sequence.
Os11g0601950	5.66199	4.12853e-08	1.06945e-05	up	cDNA clone:002-114-B06full insert sequence.
Os10g0439100	11.8349	1.10985e-06	0.000115372	up	cDNA clone:002-180-G03full insert sequence.
Os01g0233900	3.71284	1.64106e-07	2.80769e-05	up	cDNA clone:J013003E06full insert sequence.
Os02g0556000	3.85223	3.98861e-08	1.04078e-05	up	cDNA clone:J013112C08full insert sequence.
Os01g0842400	3.71804	1.35938e-07	2.46157e-05	up	cDNA clone:J013170B10full insert sequence.
Os08g0558400	2.09177	6.7083e-11	1.26458e-07	up	cDNA clone:J023090L01full insert sequence.
Os03g0147400	7.68927	9.79969e-08	1.9469e-05	up	cDNA clone:J023091E03full insert sequence.
Os01g0750300	2.52576	2.80296e-06	0.000238746	up	cDNA clone:J023093O20full insert sequence.
Os01g0750300	2.53059	6.25462e-07	7.42669e-05	up	cDNA clone:J023093O20full insert sequence.
Os01g0750300	2.92463	3.53703e-06	0.000287738	up	cDNA clone:J023093O20full insert sequence.
Os12g0133100	3.35981	1.65914e-07	2.82959e-05	up	cDNA clone:J023128K07full insert sequence.
Os01g0875500	2.42863	4.3285e-07	5.65038e-05	up	cDNA clone:J033105C09full insert sequence.
Os06g0142200	5.75394	4.56016e-06	0.000353034	up	cDNA clone:J033147G13full insert sequence.
Os05g0531500	2.54233	8.57564e-06	0.000592308	up	cDNAclone: J075118M20full insert sequence.
Os08g0554900	2.68397	2.65166e-07	3.96004e-05	up	cDNAclone: J100074O19full insert sequence.
Os06g0715300	13.0314	9.53299e-09	3.58112e-06	up	CEL5%3DCELLULASE 5 (Fragment).
Os07g0480800	2.15155	4.9603e-06	0.000377597	up	Cellulase (EC 3.2.1.4).
Os07g0480800	2.51304	2.22609e-06	0.000197902	up	Cellulase (EC 3.2.1.4).
Os05g0510800	3.17126	1.83859e-07	3.03424e-05	up	Cellulose synthase-like family C1 protein.
Os08g0253800	3.51593	5.91687e-10	4.23079e-07	up	Cellulose synthase-like family C3 protein (Fragment).
Os08g0253800	3.24473	1.90006e-07	3.10724e-05	up	Cellulose synthase-like family C3 protein (Fragment).
Os08g0345500	4.5289	9.35529e-06	0.000635646	up	Cellulose synthase-like protein D3.
Os06g0288300	2.55762	1.5044e-08	5.08069e-06	up	C-glucosyltransferaseFlavone-C-glycoside synthesis
Os12g0115700	4.72622	1.06458e-07	2.06022e-05	up	Chalcone isomerase domain containing protein.
Os12g0115700	2.43083	1.66143e-08	5.42455e-06	up	Chalcone isomerase domain containing protein.
Os04g0691900	6.55531	5.44284e-08	1.29134e-05	up	Chaperonin Cpn60/TCP-1 family protein.
Os05g0138200	8.53636	1.43693e-07	2.56312e-05	up	Chitinase (Class II) (EC 3.2.1.14).
Os09g0555500	5.59848	7.16998e-08	1.56096e-05	up	Chloroplast phytoene synthase 3.
Os09g0555500	4.80177	1.06702e-06	0.00011199	up	Chloroplast phytoene synthase 3.
Os09g0555500	4.4755	9.81053e-12	4.70152e-08	up	Chloroplast phytoene synthase 3.
Os05g0384800	3.04348	4.72692e-06	0.000363164	up	Chromosome condensation regulator protein (Fragment).
Os08g0441500	2.00441	7.38047e-06	0.000523044	up	cinnamoyl CoA reductase.
Os09g0399800	2.00807	5.29357e-07	6.57098e-05	up	Cinnamyl alcohol dehydrogenase (EC 1.1.1.195).
Os05g0494600	12.5842	1.52343e-08	5.13095e-06	up	Circadian clock coupling factor ZGT.
Os03g0751600	2.03526	9.72386e-08	1.93601e-05	up	Circumsporozoite protein.
Os11g0499600	3.51251	1.36213e-11	5.53829e-08	up	cis-23-dihydrobiphenyl-23-diol dehydrogenase.
Os11g0484000	2.70492	8.93466e-07	9.74338e-05	up	Class II aldolase/adducinN-terminal family protein.
Os11g0484000	2.35597	9.33309e-06	0.000634325	up	Class II aldolase/adducinN-terminal family protein.
Os11g0484000	2.43428	5.64452e-06	0.000420498	up	Class II aldolase/adducinN-terminal family protein.
Os11g0484000	2.3347	2.74741e-06	0.00023498	up	Class II aldolase/adducinN-terminal family protein.
Os12g0111800	6.04415	2.15881e-08	6.66647e-06	up	Class III peroxidase 136.
Os01g0327000	5.175	7.12114e-08	1.55847e-05	up	Class III peroxidase 14.
Os07g0639000	6.1568	1.76556e-09	9.90823e-07	up	Class III peroxidase 46.
Os06g0490400	5.25961	1.23911e-07	2.29684e-05	up	Class III peroxidase 80.
Os03g0260432	2.96418	4.76159e-07	6.09111e-05	up	CLE family OsCLE302 protein.
Os02g0209100	2.38319	8.31463e-06	0.000578374	up	Coatomer beta' subunit (Beta'-coat protein) (Beta'-COP) (p102).
Os10g0405500	6.01887	8.65368e-08	1.77932e-05	up	Coiled-coil proteinHomologous chromosome pairing and synapsis in meiosis
Os11g0421800	8.27716	4.45567e-10	3.42524e-07	up	Conserved hypothetical protein.
Os05g0587700	3.34152	5.36087e-08	1.27964e-05	up	Conserved hypothetical protein.
Os02g0756100	7.18217	1.72221e-07	2.89518e-05	up	Conserved hypothetical protein.
Os11g0501000	20.9149	4.26285e-06	0.00033464	up	Conserved hypothetical protein.
Os06g0294200	3.43465	2.90375e-07	4.23641e-05	up	Conserved hypothetical protein.
Os10g0377000	3.78984	2.38131e-07	3.67084e-05	up	Conserved hypothetical protein.
Os01g0235350	2.48794	2.0177e-06	0.00018396	up	Conserved hypothetical protein.
Os08g0483100	2.61992	3.11262e-07	4.43143e-05	up	Conserved hypothetical protein.
Os01g0877900	2.15785	3.57707e-07	4.91061e-05	up	Conserved hypothetical protein.
Os12g0147200	6.88961	5.37491e-12	3.93313e-08	up	Conserved hypothetical protein.
Os12g0244800	4.50072	4.49118e-07	5.81153e-05	up	Conserved hypothetical protein.
Os01g0289950	68.3	2.09778e-06	0.000189395	up	Conserved hypothetical protein.
Os01g0192550	3.76337	6.17404e-10	4.36203e-07	up	Conserved hypothetical protein.
Os05g0335500	3.8475	8.01567e-08	1.68063e-05	up	Conserved hypothetical protein.
Os10g0144000	7.16547	1.17397e-07	2.20704e-05	up	Conserved hypothetical protein.
Os07g0520600	2.0662	9.36451e-08	1.88803e-05	up	Conserved hypothetical protein.
Os10g0479200	2.03125	9.42673e-07	0.000101624	up	Conserved hypothetical protein.
Os02g0616600	2.94624	1.25607e-06	0.000126807	up	Conserved hypothetical protein.
Os03g0826000	3.18415	2.78432e-06	0.000237548	up	Conserved hypothetical protein.
Os05g0355900	5.07666	3.20433e-13	1.23546e-08	up	Conserved hypothetical protein.
Os10g0329400	3.30503	1.46161e-10	1.86511e-07	up	Conserved hypothetical protein.
Os06g0591400	3.35614	8.31338e-08	1.72301e-05	up	Conserved hypothetical protein.
Os06g0670100	2.77883	9.72315e-06	0.000655997	up	Conserved hypothetical protein.
Os01g0952800	6.76783	1.28039e-07	2.35168e-05	up	Conserved hypothetical protein.
Os10g0340301	16.5882	5.28863e-07	6.56879e-05	up	Conserved hypothetical protein.
Os01g0236000	2.14318	1.04116e-07	2.03006e-05	up	Conserved hypothetical protein.
Os01g0110200	3.21622	3.63602e-06	0.000294188	up	Conserved hypothetical protein.
Os06g0209700	2.67575	2.18997e-06	0.00019562	up	Conserved hypothetical protein.
Os05g0138000	2.41738	6.49486e-07	7.65218e-05	up	Conserved hypothetical protein.
Os07g0691700	4.53571	3.83594e-08	1.01457e-05	up	Conserved hypothetical protein.
Os09g0458200	3.43453	6.39981e-06	0.000466951	up	Conserved hypothetical protein.
Os03g0180500	79.3	5.34456e-06	0.000401469	up	Conserved hypothetical protein.
Os07g0164800	2.05426	2.92213e-06	0.000246878	up	Conserved hypothetical protein.
Os06g0670100	5.85194	1.43858e-06	0.00014111	up	Conserved hypothetical protein.
Os03g0151000	2.02081	8.88646e-07	9.70358e-05	up	Conserved hypothetical protein.
Os01g0846400	3.21312	6.01801e-07	7.22057e-05	up	Conserved hypothetical protein.
Os03g0200200	2.47816	1.08382e-06	0.000113367	up	Conserved hypothetical protein.
Os02g0616600	3.62671	3.0522e-08	8.6463e-06	up	Conserved hypothetical protein.
Os03g0806800	2.26083	5.04865e-06	0.000382918	up	Conserved hypothetical protein.
Os06g0553001	3.47022	8.79832e-09	3.38374e-06	up	Conserved hypothetical protein.
Os01g0706600	2.30184	2.15766e-06	0.000193164	up	Conserved hypothetical protein.
Os01g0898400	2.27337	5.73496e-10	4.14359e-07	up	Conserved hypothetical protein.
Os06g0209700	4.00931	2.1398e-08	6.6127e-06	up	Conserved hypothetical protein.
Os02g0639300	10.0357	4.31067e-06	0.000337627	up	Conserved hypothetical protein.
Os01g0155800	4.14394	7.84248e-09	3.13944e-06	up	Conserved hypothetical protein.
Os08g0483100	2.74082	3.81974e-06	0.000306468	up	Conserved hypothetical protein.
Os01g0968200	9.3044	5.32098e-08	1.27299e-05	up	Conserved hypothetical protein.
Os11g0107450	2.15375	7.3215e-06	0.000519752	up	Conserved hypothetical protein.
Os03g0296200	10.1817	7.40119e-08	1.59617e-05	up	Conserved hypothetical protein.
Os02g0657850	3.76014	9.61678e-08	1.923e-05	up	Conserved hypothetical protein.
Os03g0410000	3.76708	7.76056e-06	0.000546061	up	Conserved hypothetical protein.
Os02g0437300	2.39802	1.56083e-06	0.000150362	up	Conserved hypothetical protein.
Os10g0169200	2.45071	1.77898e-06	0.000166543	up	Conserved hypothetical protein.
Os01g0888800	11.0872	1.89206e-07	3.09807e-05	up	Conserved hypothetical protein.
Os05g0575500	2.47128	2.37986e-06	0.000208797	up	Conserved hypothetical protein.
Os07g0296000	4.17431	2.43524e-07	3.72478e-05	up	Conserved hypothetical protein.
Os10g0329400	2.80807	1.67044e-06	0.000158383	up	Conserved hypothetical protein.
Os04g0478600	6.48097	4.12647e-07	5.46405e-05	up	Conserved hypothetical protein.
Os10g0329400	5.59439	5.88963e-07	7.11081e-05	up	Conserved hypothetical protein.
Os12g0440300	22.3987	2.24487e-08	6.85565e-06	up	Conserved hypothetical protein.
Os09g0325220	5.13303	1.48596e-06	0.000144491	up	Conserved hypothetical protein.
Os02g0774200	2.82101	9.81123e-06	0.000660865	up	Conserved hypothetical protein.
Os01g0952800	3.92302	2.0912e-07	3.33822e-05	up	Conserved hypothetical protein.
Os02g0828400	2.62443	5.18075e-06	0.000390981	up	Conserved hypothetical protein.
Os01g0264400	2.0385	5.65066e-10	4.0898e-07	up	Conserved hypothetical protein.
Os01g0584300	7.89744	7.41164e-08	1.59677e-05	up	Conserved hypothetical protein.
Os01g0766400	2.65716	7.39074e-06	0.00052365	up	Conserved hypothetical protein.
Os11g0210000	2.75306	3.53924e-06	0.000287749	up	Conserved hypothetical protein.
Os03g0353000	2.60043	7.01903e-07	8.09497e-05	up	Conserved hypothetical protein.
Os10g0505900	50.6472	9.92704e-08	1.96514e-05	up	Conserved hypothetical protein.
Os07g0620700	19.913	6.55426e-09	2.71542e-06	up	Conserved hypothetical protein.
Os07g0142200	7.27225	8.41415e-06	0.000583536	up	Conserved hypothetical protein.
Os09g0120033	3.20744	4.88228e-07	6.19772e-05	up	Conserved hypothetical protein.
Os03g0582800	2.74172	5.44057e-07	6.70131e-05	up	Conserved hypothetical protein.
Os04g0560100	4.82973	4.80261e-08	1.18416e-05	up	Conserved hypothetical protein.
Os03g0302900	2.54832	4.97651e-09	2.18399e-06	up	Conserved hypothetical protein.
Os05g0206100	5.41509	1.28649e-07	2.36079e-05	up	Conserved hypothetical protein.
Os11g0160400	3.16706	1.38172e-08	4.78324e-06	up	Conserved hypothetical protein.
Os01g0288200	2.61131	8.71054e-09	3.36983e-06	up	Conserved hypothetical protein.
Os12g0153200	8.38211	3.56445e-09	1.71492e-06	up	Conserved hypothetical protein.
Os02g0212400	3.45867	2.26113e-07	3.52695e-05	up	Conserved hypothetical protein.
Os01g0284900	2.82514	3.06896e-07	4.39948e-05	up	Conserved hypothetical protein.
Os03g0789800	5.05202	8.30303e-08	1.72173e-05	up	Conserved hypothetical protein.
Os03g0793900	2.93662	2.25289e-06	0.000199728	up	Conserved hypothetical protein.
Os12g0153200	7.67702	6.25785e-08	1.41663e-05	up	Conserved hypothetical protein.
Os02g0168300	2.38401	1.15054e-06	0.000118415	up	Conserved hypothetical protein.
Os04g0112533	4.98743	1.30043e-07	2.379e-05	up	Conserved hypothetical protein.
Os04g0419400	8.29508	9.15608e-07	9.91963e-05	up	Conserved hypothetical protein.
Os09g0425200	4.22379	2.66113e-07	3.97133e-05	up	Conserved hypothetical protein.
Os02g0212500	2.57968	4.77855e-07	6.10529e-05	up	Conserved hypothetical protein.
Os02g0810200	2.86868	1.08835e-08	3.98863e-06	up	Conserved hypothetical protein.
Os07g0267200	3.63374	7.94761e-07	8.88186e-05	up	Conserved hypothetical protein.
Os02g0129800	4.96299	1.2851e-06	0.000128984	up	Conserved hypothetical protein.
Os01g0236000	2.34285	5.86103e-08	1.35055e-05	up	Conserved hypothetical protein.
Os11g0262600	9.39892	6.23793e-08	1.41367e-05	up	Conserved hypothetical protein.
Os01g0869300	2.07991	6.36519e-08	1.43545e-05	up	Conserved hypothetical protein.
Os03g0305200	2.47797	8.74541e-06	0.000601879	up	Conserved hypothetical protein.
Os04g0635400	3.69335	2.2996e-08	6.98679e-06	up	Conserved hypothetical protein.
Os09g0272600	3.52153	2.22566e-07	3.48973e-05	up	Conserved hypothetical protein.
Os07g0600200	5.71108	1.50898e-07	2.65398e-05	up	Conserved hypothetical protein.
Os03g0780200	2.24863	7.90159e-07	8.84711e-05	up	Conserved hypothetical protein.
Os07g0567801	3.24906	7.02158e-07	8.09566e-05	up	Conserved hypothetical protein.
Os02g0140800	9.125	7.89898e-08	1.66715e-05	up	Conserved hypothetical protein.
Os10g0193100	3.25271	1.58659e-07	2.73876e-05	up	Conserved hypothetical protein.
Os07g0531200	7.3985	6.79632e-07	7.89742e-05	up	Conserved hypothetical protein.
Os01g0838200	4.97173	1.9921e-07	3.20718e-05	up	Conserved hypothetical protein.
Os10g0360100	5.29505	1.08272e-07	2.08268e-05	up	Conserved hypothetical protein.
Os03g0826000	4.71701	7.93533e-13	2.05018e-08	up	Conserved hypothetical protein.
Os01g0968100	53.4706	8.12719e-09	3.21569e-06	up	Conserved hypothetical protein.
Os11g0501500	3.1005	4.63475e-06	0.000357341	up	Conserved hypothetical protein.
Os01g0952800	5.16922	7.17576e-07	8.21179e-05	up	Conserved hypothetical protein.
Os07g0599900	3.97963	1.85311e-10	2.06039e-07	up	Conserved hypothetical protein.
Os10g0360100	4.49636	1.25099e-07	2.30909e-05	up	Conserved hypothetical protein.
Os06g0180300	11.6429	5.01079e-07	6.31063e-05	up	Conserved hypothetical protein.
Os04g0589400	2.1669	8.7804e-08	1.79726e-05	up	Conserved hypothetical protein.
Os11g0533400	10.0977	4.54641e-07	5.87018e-05	up	Conserved hypothetical protein.
Os07g0267200	4.89626	5.62945e-08	1.32126e-05	up	Conserved hypothetical protein.
Os09g0466800	14.0738	2.12577e-08	6.57749e-06	up	Conserved hypothetical protein.
Os08g0331000	2.23181	2.2366e-06	0.000198481	up	Conserved hypothetical protein.
Os09g0120033	5.16906	7.86043e-08	1.66406e-05	up	Conserved hypothetical protein.
Os03g0204900	2.77697	5.77162e-07	7.00505e-05	up	Conserved hypothetical protein.
Os03g0745550	2.96754	3.46724e-06	0.000283674	up	Conserved hypothetical protein.
Os06g0347966	8.78105	1.0104e-09	6.41709e-07	up	Conserved hypothetical protein.
Os01g0235200	2.0845	5.73614e-07	6.9717e-05	up	Conserved hypothetical protein.
Os06g0611300	2.3692	1.45409e-06	0.000142194	up	Conserved hypothetical protein.
Os07g0150901	3.63504	7.07998e-06	0.000505898	up	Conserved hypothetical protein.
Os08g0484300	2.53245	4.57775e-06	0.000353962	up	Conserved hypothetical protein.
Os02g0594166	13.2074	5.0482e-08	1.22835e-05	up	Conserved hypothetical protein.
Os01g0767600	2.09242	8.8593e-07	9.67902e-05	up	Conserved hypothetical protein.
Os02g0506100	2.46287	1.66589e-07	2.83847e-05	up	Conserved hypothetical protein.
Os10g0466800	3.02897	9.54777e-06	0.000646478	up	Conserved hypothetical protein.
Os05g0339300	6.66582	6.00181e-09	2.52956e-06	up	Conserved hypothetical protein.
Os02g0699466	2.32747	1.83477e-07	3.03035e-05	up	Conserved hypothetical protein.
Os05g0107101	3.05693	1.08442e-06	0.000113369	up	Conserved hypothetical protein.
Os06g0591200	3.23238	8.77328e-12	4.60567e-08	up	Conserved hypothetical protein.
Os12g0102700	2.15243	9.84508e-06	0.000662727	up	Conserved hypothetical protein.
Os04g0218600	18.5745	7.95594e-06	0.00055735	up	Conserved hypothetical protein.
Os05g0426900	7.03436	1.23441e-10	1.74182e-07	up	Conserved hypothetical protein.
Os06g0651200	5.00291	1.88408e-09	1.04462e-06	up	Conserved hypothetical protein.
Os11g0195800	4.14029	6.60898e-12	3.93313e-08	up	Conserved hypothetical protein.
Os01g0882000	9.56303	3.47674e-08	9.49232e-06	up	Conserved hypothetical protein.
Os09g0101300	8.0036	1.68876e-08	5.47238e-06	up	Conserved hypothetical protein.
Os09g0109600	26.1714	5.25732e-08	1.26104e-05	up	Conserved hypothetical protein.
Os01g0182400	2.81588	8.35688e-08	1.7303e-05	up	Conserved hypothetical protein.
Os01g0962100	3.44176	2.80364e-06	0.000238755	up	Conserved hypothetical protein.
Os04g0419100	4.92172	2.93846e-10	2.62639e-07	up	Conserved hypothetical protein.
Os02g0258800	2.52699	1.32376e-06	0.000132129	up	Conserved hypothetical protein.
Os03g0154300	3.58404	2.00244e-07	3.22008e-05	up	Conserved hypothetical protein.
Os04g0367800	2.05055	5.00859e-06	0.000380429	up	Conserved hypothetical protein.
Os01g0226200	2.52104	4.11694e-06	0.000325829	up	Conserved hypothetical protein.
Os11g0640800	2.20957	6.36951e-06	0.000465231	up	Conserved hypothetical protein.
Os08g0478000	3.70519	2.15626e-06	0.000193101	up	Conserved hypothetical protein.
Os07g0177100	12.8261	4.80427e-09	2.13745e-06	up	Conserved hypothetical protein.
Os02g0212500	4.07717	4.90119e-06	0.000374128	up	Conserved hypothetical protein.
Os06g0338200	4.5539	1.17487e-07	2.20772e-05	up	Copper amine oxidase family protein.
Os01g0758000	2.17443	1.88744e-09	1.04508e-06	up	copper-binding family protein.
Os04g0610600	2.98357	3.01015e-07	4.34068e-05	up	Cor14b protein precursor.
Os03g0130300	5.94444	1.69881e-07	2.87661e-05	up	Cp-thionin.
Os03g0197300	3.46468	1.23175e-07	2.28754e-05	up	Cupin family proteinexpressed.
Os09g0316000	3.48082	3.71597e-06	0.000299533	up	cupinRmlC-type.
Os07g0105000	2.27779	4.53188e-06	0.000351238	up	Cupredoxin domain containing protein.
Os04g0629200	3.71184	1.88213e-07	3.09012e-05	up	Cupredoxin domain containing protein.
Os01g0958200	106.7	1.70355e-07	2.87897e-05	up	Curculin-like (mannose-binding) lectin domain containing protein.
Os05g0502000	2.67285	2.35462e-06	0.000206845	up	Cyclic nucleotide-gated ion channel 4 (AtCNGC4) (Cyclic nucleotide-and calmodulin-regulated ion channel 4) (AtHLM1).
Os06g0113600	2.5075	5.49589e-10	3.99872e-07	up	Cyclin-like F-box domain containing protein.
Os09g0454300	3.75235	4.67482e-06	0.000359628	up	Cyclin-like F-box domain containing protein.
Os10g0563900	2.50184	1.27323e-07	2.34372e-05	up	Cyclin-related 2 domain containing protein.
Os10g0563900	2.8333	2.5872e-07	3.88477e-05	up	Cyclin-related 2 domain containing protein.
Os09g0381400	33.6471	9.37867e-09	3.5424e-06	up	cysteine protease.
Os09g0381400	6.90909	1.56042e-08	5.21049e-06	up	cysteine protease.
Os02g0715000	7.42711	1.19687e-12	2.12997e-08	up	Cysteine proteinase.
Os01g0895300	4.1911	4.66718e-06	0.000359307	up	Cytochrome b561eukaryote domain containing protein.
Os01g0895300	2.71767	2.15322e-06	0.000192996	up	Cytochrome b561eukaryote domain containing protein.
Os03g0288800	2.39221	3.18246e-06	0.000264753	up	Cytochrome B561-related domain containing protein.
Os03g0341300	2.93858	4.50208e-10	3.44487e-07	up	Cytochrome c oxidoreductase.
Os03g0602300	2.03437	1.86693e-10	2.06449e-07	up	Cytochrome P450 85A1 (EC 1.14.-.-) (C6-oxidase) (OsDWARF) (Dwarf protein).
Os01g0854800	5.63547	6.60757e-08	1.47726e-05	up	Cytochrome P450 86A1 (EC 1.14.-.-) (CYPLXXXVI) (P450-dependent fatty acid omega-hydroxylase).
Os04g0180400	4.04854	4.14524e-11	1.00976e-07	up	Cytochrome P450 99A2.
Os01g0628900	16.2254	5.18186e-07	6.47495e-05	up	Cytochrome P450 family protein.
Os10g0524700	2.22722	2.19956e-07	3.46847e-05	up	Cytochrome P450 family protein.
Os09g0457100	4.45307	1.21813e-06	0.000123851	up	Cytochrome P450 family protein.
Os03g0760200	2.52027	2.19068e-07	3.45841e-05	up	Cytochrome P450 family protein.
Os06g0613600	3.12455	3.76882e-08	1.00451e-05	up	Cytochrome P450 family protein.
Os07g0518100	2.7881	2.34626e-07	3.62971e-05	up	Cytochrome P450 family protein.
Os10g0171500	2.1439	2.71295e-07	4.02798e-05	up	Cytochrome P450 family proteinexpressed.
Os10g0171500	2.30098	2.11401e-08	6.54763e-06	up	Cytochrome P450 family proteinexpressed.
Os02g0666500	3.43174	2.38818e-09	1.24897e-06	up	Cytochrome P450.
Os10g0486100	2.26012	8.96294e-07	9.7614e-05	up	Cytochrome P450-like protein (CYP86B1).
Os01g0187600	5.90631	5.6337e-08	1.32151e-05	up	Cytokinin dehydrogenase 1.
Os04g0459800	2.11181	4.27687e-07	5.6039e-05	up	DEAD-like helicaseN-terminal domain containing protein.
Os06g0127100	4.22556	6.4915e-08	1.45759e-05	up	Dehydration-responsive element-binding protein 1C.
Os11g0451700	13.8341	5.54377e-08	1.30584e-05	up	Dehydrin DHN1 (M3) (RAB-17 protein).
Os11g0454200	8.72111	2.3426e-07	3.62646e-05	up	Dehydrin RAB 16B.
Os11g0453900	10.5505	4.42414e-07	5.7427e-05	up	Dehydrin RAB 16D.
Os07g0557200	2.64592	1.75797e-07	2.94098e-05	up	Delayed-early response protein/equilibrative nucleoside transporter family protein.
Os07g0557400	6.88479	3.78904e-07	5.1347e-05	up	Delayed-early response protein/equilibrative nucleoside transporter family protein.
Os07g0557400	2.508	8.76335e-09	3.38374e-06	up	Delayed-early response protein/equilibrative nucleoside transporter family protein.
Os01g0848200	3.73672	3.36631e-08	9.28105e-06	up	Delta 1-pyrroline-5-carboxylate synthetase (P5CS) [Includes: Glutamate 5-kinase (EC 2.7.2.11) (Gamma-glutamyl kinase) (GK)%3B Gamma-glutamyl phosphate reductase (GPR) (EC 1.2.1.41) (Glutamate-5-semialdehyde dehydrogenase) (Glutamyl-gamma-semialdehyde dehydrogenase)].
Os07g0158200	2.17336	8.19329e-07	9.10977e-05	up	DeoxyribonucleaseTatD Mg-dependent domain containing protein.
Os01g0782200	3.10097	2.31473e-06	0.000203815	up	D-erythro-sphingosine kinase/ diacylglycerol kinase.
Os05g0156700	2.03773	2.62997e-10	2.43462e-07	up	Dihydrolipoyl dehydrogenase.
Os06g0154600	2.54577	4.36101e-06	0.000340797	up	Dihydroneopterin aldolase.
Os01g0155300	3.43082	3.65225e-07	4.99398e-05	up	dirigent-like protein.
Os12g0482100	3.17291	2.00992e-06	0.000183442	up	Disease resistance protein domain containing protein.
Os12g0481700	2.21974	1.04186e-06	0.000109777	up	Disease resistance protein domain containing protein.
Os12g0481700	3.51698	1.77058e-06	0.000166019	up	Disease resistance protein domain containing protein.
Os12g0482100	2.46836	1.57832e-06	0.000151406	up	Disease resistance protein domain containing protein.
Os12g0481700	3.15635	5.3451e-07	6.61515e-05	up	Disease resistance protein domain containing protein.
Os12g0482100	2.42087	6.6972e-07	7.80631e-05	up	Disease resistance protein domain containing protein.
Os10g0548100	16.3337	5.18948e-09	2.26309e-06	up	DM280 protein.
Os09g0402533	23.2128	9.85835e-07	0.000104989	up	DNA binding protein.
Os12g0194600	2.21092	2.33357e-10	2.28961e-07	up	DNA binding protein.
Os07g0676600	11.2573	3.15214e-10	2.75136e-07	up	DNA binding protein.
Os04g0599650	2.30159	8.06409e-06	0.000563801	up	DNA helicaseUvrD/REP type domain containing protein.
Os03g0798300	2.82803	2.87492e-08	8.25689e-06	up	DNA methyltransferaseMaintenance of CpG methylation after DNA replication
Os04g0185100	4.35829	3.07177e-07	4.40128e-05	up	DNA replication factor CDT1-like domain containing protein.
Os10g0391300	2.04107	3.73804e-06	0.000300962	up	DNA-binding SAP domain containing protein.
Os12g0291000	5.4273	3.63619e-06	0.000294188	up	DNA-directed DNA polymerase family protein.
Os07g0229700	2.19276	1.13496e-10	1.66912e-07	up	DNA-directed RNA polymerase I subunit 12 (EC 2.7.7.6) (Nuclear RNA polymerase I small specific subunit Rpa12) (Zinc ribbon domain containing protein 1).
Os01g0893700	7.8705	2.79124e-07	4.10713e-05	up	DOMON domain domain containing protein.
Os01g0895200	4.09452	2.19255e-06	0.000195799	up	DOMON related domain containing protein.
Os01g0233000	2.15408	3.20416e-06	0.000265768	up	DREPP plasma membrane polypeptide family protein.
Os05g0358000	4.09504	1.6405e-07	2.80769e-05	up	Drought induced 19 family protein.
Os01g0839200	3.90254	5.91381e-08	1.36104e-05	up	DUF966 family proteinAbiotic stress response
Os04g0462600	3.52229	3.84171e-08	1.01481e-05	up	Dynein light chaintype 1 family protein.
Os02g0739700	2.80482	7.73774e-06	0.000544732	up	E2F Family domain containing protein.
Os06g0245900	2.38688	6.02822e-07	7.22973e-05	up	E2F Family domain containing protein.
Os01g0786500	3.43148	2.15239e-06	0.000192963	up	early nodulin 20.
Os10g0177200	3.80927	1.41281e-06	0.000139075	up	EF-HAND 2 domain containing protein.
Os02g0613000	2.01264	1.96027e-07	3.17318e-05	up	EF-Hand type domain containing protein.
Os10g0453900	3.45245	1.50738e-10	1.88296e-07	up	Eggshell protein family protein.
Os10g0452700	5.41829	2.20487e-10	2.22484e-07	up	Eggshell protein family protein.
Os02g0158100	2.11794	1.13737e-09	7.04019e-07	up	EH-domain-containing protein 1.
Os04g0588200	6.63596	6.03804e-06	0.000444701	up	emb2411 (embryo defective 2411)%3B ATP binding / ATP-dependent DNA helicase/ DNA binding.
Os03g0376000	2.66795	8.9112e-06	0.000610553	up	emp24/gp25L/p24 family protein.
Os11g0275500	3.48995	5.06529e-08	1.22919e-05	up	Endo-4-beta-D-glucanase precursor (EC 3.2.1.-).
Os01g0183300	2.44371	4.72101e-08	1.16908e-05	up	Endonuclease/exonuclease/phosphatase domain containing protein.
Os01g0183300	2.47194	4.96047e-08	1.2137e-05	up	Endonuclease/exonuclease/phosphatase domain containing protein.
Os05g0114100	3.05304	1.18569e-08	4.26853e-06	up	endonuclease/exonuclease/phosphatase family protein.
Os03g0663700	3.17718	3.24796e-07	4.57999e-05	up	Endonuclease/Exonuclease/phosphatase family proteinexpressed.
Os08g0327400	2.25445	4.92545e-07	6.23343e-05	up	Enoyl-ACP reductase (Fragment).
Os06g0569500	3.80763	1.09387e-08	4.00401e-06	up	Ent-kaurene oxidaseDiterpenoid phytoalexin biosynthesis
Os11g0581700	3.23602	2.44518e-06	0.000213041	up	EPIDERMAL PATTERNING FACTOR-like protein 4.
Os10g0498000	3.76335	5.19032e-06	0.000391443	up	Epoxide hydrolase.
Os05g0112101	2.03851	2.99554e-06	0.000251686	up	Epsin-likeN-terminal domain containing protein.
Os04g0376700	2.22187	6.54304e-09	2.71355e-06	up	ER lumen protein retaining receptor (HDEL receptor) (PGP169-12).
Os12g0633200	2.17314	1.77123e-08	5.67822e-06	up	Erg28-like family protein.
Os02g0769200	9.92481	8.56315e-07	9.4325e-05	up	erwinia induced protein 1.
Os01g0215500	2.29341	2.06092e-08	6.42157e-06	up	esterase.
Os05g0133401	4.57258	1.72662e-08	5.56028e-06	up	EsteraseSGNH hydrolase-type domain containing protein.
Os06g0257600	8.20946	1.81596e-07	3.00993e-05	up	EsteraseSGNH hydrolase-type domain containing protein.
Os06g0257600	4.1651	5.29376e-06	0.000398086	up	EsteraseSGNH hydrolase-type domain containing protein.
Os06g0257600	7.66994	1.71024e-13	1.09837e-08	up	EsteraseSGNH hydrolase-type domain containing protein.
Os05g0133401	6.54183	6.59251e-06	0.000477733	up	EsteraseSGNH hydrolase-type domain containing protein.
Os09g0571700	76.1	7.09427e-06	0.00050647	up	Ethylene-responsive transcription factor ERF096.
Os02g0611500	2.31407	4.91433e-07	6.22697e-05	up	Eukaryotic initiation factor-like protein.
Os03g0749500	2.83566	3.01385e-07	4.34299e-05	up	Exo-beta-glucanase.
Os12g0224400	3.34077	2.70292e-06	0.000231699	up	Exostosin family proteinexpressed.
Os05g0277000	4.46515	2.29345e-08	6.97321e-06	up	Expansin Os-EXPA3.
Os04g0228400	3.37449	1.69481e-06	0.000160242	up	Expansin precursor (Alpha-expansin OsEXPA1).
Os04g0228400	4.38363	4.468e-07	5.78877e-05	up	Expansin precursor (Alpha-expansin OsEXPA1).
Os03g0155700	6.66313	6.5175e-08	1.46106e-05	up	Expansin-A15.
Os02g0268400	28.4146	5.30528e-07	6.58157e-05	up	Expansin-A23.
Os02g0268050	31.0244	1.75927e-07	2.94197e-05	up	Expansin-A23.
Os03g0155500	17.9014	8.74928e-07	9.5942e-05	up	Expansin-A25.
Os03g0155500	21.2128	1.99399e-06	0.000182179	up	Expansin-A25.
Os10g0439200	4.99044	2.98072e-07	4.30872e-05	up	Expansin-A28.
Os03g0428700	11.9117	5.76505e-08	1.3357e-05	up	Expansin-A31.
Os10g0556100	2.35409	2.39186e-07	3.67802e-05	up	Expansin-B4.
Os10g0556100	2.45164	7.22389e-07	8.25775e-05	up	Expansin-B4.
Os07g0475400	3.00558	3.0899e-07	4.41051e-05	up	Expansin-like protein A (Fragment).
Os10g0438600	3.96944	6.33472e-06	0.000462853	up	Family II lipase EXL3.
Os10g0438600	5.1802	2.04342e-11	6.72583e-08	up	Family II lipase EXL3.
Os03g0788700	2.61033	6.16013e-07	7.34545e-05	up	FAS1 domain domain containing protein.
Os03g0788600	2.96742	1.50242e-07	2.64468e-05	up	FAS1 domain domain containing protein.
Os01g0159200	2.54091	8.42569e-06	0.00058414	up	Fasciclin-like protein FLA18.
Os12g0104400	2.25687	2.37911e-09	1.24897e-06	up	Fatty acid desaturasetype 1 domain containing protein.
Os03g0780800	2.05758	1.59346e-06	0.000152515	up	Fatty acid hydroxylase domain containing protein.
Os09g0567500	12.4175	1.42772e-13	1.09837e-08	up	Fatty acyl coA reductase.
Os09g0567500	5.96908	2.43633e-08	7.31561e-06	up	Fatty acyl coA reductase.
Os06g0495632	5.35834	9.02e-08	1.83283e-05	up	F-box domain containing protein.
Os06g0684900	97.3	3.91507e-07	5.26141e-05	up	F-box domainSkp2-like domain containing protein.
Os01g0509900	2.17035	2.39989e-11	7.35592e-08	up	F-box domainSkp2-like domain containing protein.
Os02g0767300	2.47116	2.40958e-06	0.000210558	up	Flavonol synthase/flavanone 3-hydroxylase (EC 1.14.11.23) (EC 1.14.11.9) (FLS) (CitFLS).
Os03g0728500	2.50807	1.53194e-06	0.000148027	up	Forkhead-associated domain containing protein.
Os10g0347800	3.34674	1.67675e-06	0.000158772	up	Formin-like protein 4.
Os06g0726800	2.08229	1.10502e-08	4.0377e-06	up	G2/mitotic-specific cyclin 2 (B-like cyclin) (CycOs2).
Os03g0856700	2.54348	1.32165e-06	0.000131981	up	GA 20-oxidase1GA metabolism
Os08g0128000	2.21029	1.12517e-06	0.000116584	up	Galactose oxidase/kelchbeta-propeller domain containing protein.
Os06g0211600	4.4375	3.94273e-07	5.28487e-05	up	Galactoside 2-alpha-L-fucosyltransferase (EC 2.4.1.69) (Xyloglucan alpha-(12)-fucosyltransferase) (PsFT1).
Os09g0414900	4.5086	3.56339e-06	0.000289258	up	GASA5-like protein (Fragment).
Os06g0266800	2.58072	1.2957e-08	4.54618e-06	up	GAST gene family proteinCoordinator in crosstalk between GA nad BR signaling
Os02g0180400	2.66594	4.41593e-07	5.73743e-05	up	GCN5-related N-acetyltransferase (GNAT) domain domain containing protein.
Os03g0277000	4.37762	2.24134e-08	6.84992e-06	up	GDP dissociation inhibitorNegative regulator for RabNegative feedback between Rab GDP-GTP cycle and MAPK pathways
Os01g0150100	2.08838	1.49647e-07	2.63901e-05	up	Geranylgeranyltransferase type I beta subunit.
Os06g0131500	2.03495	1.16859e-06	0.000119902	up	glucan endo-13-beta-glucosidase 7.
Os08g0476300	12.5109	3.48292e-06	0.00028434	up	Glucose/ribitol dehydrogenase family protein.
Os04g0447400	4.66563	3.98826e-06	0.000316984	up	Glutamate decarboxylase 2 (EC 4.1.1.15) (GAD 2).
Os04g0543900	4.12518	2.43644e-08	7.31561e-06	up	Glutamate dehydrogenase 2.
Os04g0543900	2.39086	5.86796e-07	7.09084e-05	up	Glutamate dehydrogenase 2.
Os06g0483150	7.11575	7.6228e-08	1.62705e-05	up	Glutamate dehydrogenaseNAD-specific domain containing protein.
Os03g0712800	5.96629	1.40709e-08	4.85081e-06	up	Glutamine synthetase root isozyme 2 (EC 6.3.1.2) (Glutamate--ammonia ligase).
Os10g0415300	2.35605	6.1765e-06	0.00045345	up	Glutathione reductaseSalt tolerance
Os03g0785900	5.35191	3.16772e-08	8.90661e-06	up	Glutathione-S-transferase.
Os01g0607000	4.35479	2.98523e-06	0.000251023	up	Glutelin family protein.
Os06g0666600	2.06342	2.88379e-07	4.21563e-05	up	Glyceraldehyde-3-phosphate dehydrogenasecytosolic 3 (EC 1.2.1.12).
Os01g0855000	4.84943	3.78613e-11	9.76729e-08	up	Glycerol-3-phosphate acyltransferase 6 (EC 2.3.1.15) (AtGPAT6).
Os01g0855000	2.57552	3.40616e-07	4.73395e-05	up	Glycerol-3-phosphate acyltransferase 6 (EC 2.3.1.15) (AtGPAT6).
Os10g0413400	6.61148	1.37508e-07	2.48162e-05	up	Glycerol-3-phosphate acyltransferase 6 (EC 2.3.1.15) (AtGPAT6).
Os10g0413400	87.7	1.33095e-06	0.000132718	up	Glycerol-3-phosphate acyltransferase 6 (EC 2.3.1.15) (AtGPAT6).
Os02g0114400	2.74032	3.29516e-06	0.000272065	up	glycerol-3-phosphate acyltransferase 8.
Os10g0452500	3.98784	2.06291e-06	0.000187002	up	Glycine-rich protein precursor.
Os05g0392100	2.3518	5.29319e-07	6.57098e-05	up	glycine-rich protein.
Os06g0179000	2.7566	3.63162e-08	9.77998e-06	up	Glycoside hydrolase family 79N-terminal protein.
Os10g0370500	2.82446	2.01124e-07	3.23297e-05	up	Glycoside hydrolasecatalytic core domain containing protein.
Os10g0370500	3.02388	1.23261e-12	2.12997e-08	up	Glycoside hydrolasecatalytic core domain containing protein.
Os03g0201901	6.4958	2.77225e-06	0.000236714	up	Glycoside hydrolasefamily 10 domain containing protein.
Os03g0201901	4.13352	9.44852e-08	1.89864e-05	up	Glycoside hydrolasefamily 10 domain containing protein.
Os03g0201901	7.15888	6.53102e-06	0.000474528	up	Glycoside hydrolasefamily 10 domain containing protein.
Os08g0240500	4.10433	2.56608e-08	7.60153e-06	up	Glycoside hydrolasefamily 16 domain containing protein.
Os03g0722500	2.35263	8.7157e-06	0.000600333	up	Glycoside hydrolasefamily 17 protein.
Os03g0845600	3.70531	6.19938e-07	7.37529e-05	up	Glycoside hydrolasefamily 17 protein.
Os03g0221500	2.27742	1.8731e-06	0.000173358	up	Glycoside hydrolasefamily 17 protein.
Os01g0658700	2.72067	3.97137e-07	5.31125e-05	up	Glycoside hydrolase-type carbohydrate-bindingsubgroup domain containing protein.
Os03g0243700	3.12501	6.62789e-07	7.75823e-05	up	Glycosyl hydrolase family 10 proteinexpressed.
Os02g0806500	4.52343	4.99027e-08	1.21955e-05	up	Glycosyl transferase family 2 protein.
Os02g0806500	9.42208	4.08591e-08	1.06373e-05	up	Glycosyl transferase family 2 protein.
Os11g0502700	2.15754	1.1738e-06	0.000120377	up	Glycosyl transferasefamily 31 domain containing protein.
Os03g0803600	6.34772	4.85237e-09	2.15229e-06	up	Glycosyl transferasefamily 31 protein.
Os03g0184300	2.98294	9.28143e-07	0.000100424	up	Glycosyl transferasefamily 8 protein.
Os03g0184300	2.08223	9.7517e-09	3.65334e-06	up	Glycosyl transferasefamily 8 protein.
Os01g0653200	3.75268	4.16514e-07	5.50624e-05	up	Glycosyl transferasegroup 1 domain containing protein.
Os03g0300000	3.92022	7.53798e-11	1.3417e-07	up	glycosyltransferase 5.
Os01g0119000	2.76513	4.82249e-07	6.14709e-05	up	Glycosyltransferase AER61uncharacterized domain containing protein.
Os09g0480400	2.19995	8.23239e-08	1.71394e-05	up	Glycosyltransferase QUASIMODO1 (EC 2.4.1.-).
Os06g0706850	2.61058	1.0122e-07	1.99138e-05	up	Glycosyltransferase.
Os08g0489300	2.32382	1.99593e-06	0.000182245	up	GMP synthase.
Os07g0412100	2.15059	6.86768e-07	7.96695e-05	up	Granule-bound starch synthase 2Starch biosynthesis
Os11g0139600	2.70074	4.82313e-07	6.14709e-05	up	GRAS family transcription factor containing protein.
Os11g0139600	12.4969	3.83903e-08	1.01474e-05	up	GRAS family transcription factor containing protein.
Os09g0367700	8.76991	3.40594e-08	9.35445e-06	up	GST6 protein (EC 2.5.1.18).
Os04g0661100	5.5722	4.86339e-08	1.19417e-05	up	H0112G12.8 protein.
Os04g0192350	2.63866	7.17357e-09	2.90816e-06	up	H0124E07.4 protein.
Os03g0857500	2.20536	1.67416e-07	2.84809e-05	up	H0201G08.9 protein.
Os03g0131800	4.29294	1.67057e-07	2.84513e-05	up	H0211B05.1 protein.
Os04g0629400	4.18451	8.92203e-06	0.000610992	up	H0303G06.19 protein.
Os04g0635100	3.23836	1.59779e-07	2.75148e-05	up	H0315F07.12 protein.
Os01g0165600	5.36634	9.98634e-08	1.97405e-05	up	H0323C08.17 protein.
Os04g0642000	2.18908	1.06718e-06	0.00011199	up	H0423H10.7 protein.
Os04g0405700	5.73994	4.66293e-06	0.000359113	up	H0502B11.13 protein.
Os04g0404400	3.77641	2.57546e-07	3.87696e-05	up	H0502B11.4 protein.
Os04g0482100	2.619	8.2728e-07	9.17795e-05	up	H0510A06.16 protein.
Os04g0455600	2.25005	1.42768e-06	0.00014024	up	H0523F07.2 protein.
Os04g0456200	5.22483	8.21093e-08	1.71205e-05	up	H0523F07.6 protein.
Os04g0483000	6.10598	8.22573e-08	1.71341e-05	up	H0525D09.13 protein.
Os02g0536500	2.55055	8.57292e-07	9.44075e-05	up	H0622F05.5 protein.
Os04g0393900	3.36618	7.51981e-08	1.61253e-05	up	H0718E12.2 protein.
Os04g0679000	2.1674	8.44978e-09	3.29353e-06	up	H0801D08.9 protein.
Os04g0669900	3.0647	8.0243e-08	1.68091e-05	up	H0818H01.11 protein.
Os04g0666900	2.01004	7.14777e-10	4.93236e-07	up	H1005F08.22 protein.
Os05g0135000	4.09714	1.51027e-06	0.000146376	up	Haem peroxidase family protein.
Os05g0135500	3.00926	1.15061e-07	2.17793e-05	up	Haem peroxidase family protein.
Os05g0135500	2.30251	3.18926e-06	0.000265062	up	Haem peroxidase family protein.
Os05g0134700	3.06048	7.81215e-07	8.77065e-05	up	Haem peroxidase family protein.
Os10g0566800	2.80723	3.29881e-07	4.62684e-05	up	Haem peroxidaseplant/fungal/bacterial family protein.
Os07g0531500	4.1552	2.93375e-07	4.26611e-05	up	Harpin-induced 1 domain containing protein.
Os07g0524200	7.85761	3.31751e-09	1.61674e-06	up	Harpin-induced 1 domain containing protein.
Os07g0524200	4.31661	4.82524e-06	0.000369009	up	Harpin-induced 1 domain containing protein.
Os02g0649300	37.267	1.40014e-07	2.51699e-05	up	HD-ZIP I proteinTranscription activatorStress responsePanicle development
Os05g0519700	2.69286	4.1723e-07	5.50915e-05	up	Heat shock protein 101.
Os03g0277300	2.56943	7.28213e-06	0.000517791	up	Heat shock protein 70.
Os12g0569700	9.96591	2.26817e-06	0.00020062	up	Heat shock protein 70.
Os01g0571300	4.74462	1.27771e-07	2.34988e-05	up	Heat shock transcription factor 31 (Fragment).
Os06g0682900	3.55097	4.01204e-06	0.000318447	up	Heat stress associated proteinLong-term acquired thermotolerance
Os06g0553100	4.02613	2.78065e-12	2.77563e-08	up	Heat stress transcription factor C-2b.
Os04g0244800	2.32986	1.22372e-10	1.74182e-07	up	Heavy metal transport/detoxification protein domain containing protein.
Os04g0357300	2.76573	3.46461e-06	0.000283571	up	Helicase-like protein [Oryza sativa (japonica cultivar-group)].
Os01g0630300	5.61295	9.13575e-08	1.8491e-05	up	Helix-loop-helix DNA-binding domain containing protein.
Os01g0190400	2.92432	6.68848e-06	0.000482747	up	Hexokinase.
Os03g0218400	3.05581	1.39071e-10	1.81562e-07	up	Hexose transporter.
Os03g0218400	3.34427	8.02865e-09	3.19239e-06	up	Hexose transporter.
Os03g0218400	4.3669	2.90384e-11	8.18455e-08	up	Hexose transporter.
Os03g0218400	2.78465	5.42404e-07	6.6889e-05	up	Hexose transporter.
Os05g0304800	4.38796	1.66708e-08	5.4297e-06	up	Histone-fold domain containing protein.
Os01g0183400	2.43309	1.87798e-07	3.08697e-05	up	Histone-fold domain containing protein.
Os12g0511200	4.37647	2.5978e-07	3.89644e-05	up	Hly-III related domain containing protein.
Os06g0643700	2.15121	7.4184e-10	5.07686e-07	up	Hly-III related domain containing protein.
Os02g0179500	2.29957	9.55921e-11	1.5366e-07	up	Hly-III related domain containing protein.
Os04g0541700	2.37215	2.31518e-09	1.22512e-06	up	Homeodomain-leucine zipper (HD-Zip) proteinTranscription factorABA-mediated drought and salt tolerance
Os05g0579600	2.93676	2.76836e-07	4.08141e-05	up	Homeodomain-like containing protein.
Os03g0221200	2.57347	4.6497e-09	2.08695e-06	up	Homocysteine S-methyltransferase 1 (EC 2.1.1.10) (S- methylmethionine:homocysteine methyltransferase 1) (SMM:Hcy S- methyltransferase 1) (ZmHMT-1).
Os04g0636200	3.39241	5.23223e-07	6.52021e-05	up	Hpt domain containing protein.
Os07g0274700	2.3135	1.38111e-06	0.000136506	up	HvB12D protein (B12Dg1 protein).
Os06g0132500	7.1	1.59825e-07	2.75148e-05	up	hydrolasealpha/beta fold family protein.
Os06g0132500	4.85879	8.05774e-09	3.20089e-06	up	hydrolasealpha/beta fold family protein.
Os01g0619800	2.46902	4.38111e-08	1.11196e-05	up	Hydrolasehydrolyzing O-glycosyl compounds.
Os05g0304900	5.60465	5.21613e-06	0.000393103	up	hydrolasehydrolyzing O-glycosyl compounds.
Os01g0299300	2.68774	3.17647e-07	4.49456e-05	up	Hypothetical conserved gene.
Os11g0668300	3.29567	1.67482e-06	0.000158654	up	Hypothetical conserved gene.
Os03g0743200	6.6639	6.44649e-08	1.44827e-05	up	Hypothetical conserved gene.
Os06g0180100	8.0133	1.42216e-13	1.09837e-08	up	Hypothetical conserved gene.
Os01g0495701	10.3372	9.65745e-08	1.92726e-05	up	Hypothetical conserved gene.
Os03g0355700	2.38644	9.40425e-06	0.000638324	up	Hypothetical conserved gene.
Os01g0576000	10.3743	2.76496e-08	7.99089e-06	up	Hypothetical conserved gene.
Os01g0909300	2.6751	2.6512e-06	0.000227926	up	Hypothetical conserved gene.
Os06g0503800	7.44984	1.9013e-07	3.10805e-05	up	Hypothetical conserved gene.
Os02g0779650	2.77685	3.07347e-07	4.40128e-05	up	Hypothetical conserved gene.
Os02g0209000	3.32998	1.38626e-10	1.81562e-07	up	Hypothetical conserved gene.
Os08g0280200	3.66923	5.57383e-11	1.16994e-07	up	Hypothetical conserved gene.
Os12g0431700	6.65366	7.50885e-08	1.61101e-05	up	Hypothetical conserved gene.
Os08g0444440	174.9	2.78219e-09	1.40634e-06	up	Hypothetical conserved gene.
Os01g0243800	10.4569	2.01937e-08	6.33972e-06	up	Hypothetical conserved gene.
Os10g0132500	3.56593	6.01559e-07	7.22057e-05	up	Hypothetical conserved gene.
Os08g0529300	8.37396	5.1757e-08	1.24506e-05	up	Hypothetical conserved gene.
Os01g0868600	2.74104	7.10027e-08	1.55472e-05	up	Hypothetical conserved gene.
Os08g0388300	3.09709	8.57261e-06	0.000592247	up	Hypothetical conserved gene.
Os03g0314500	2.57299	1.11824e-06	0.000116002	up	Hypothetical conserved gene.
Os07g0559100	2.23986	2.33212e-08	7.05458e-06	up	Hypothetical conserved gene.
Os09g0421166	2.8319	1.6459e-08	5.40453e-06	up	Hypothetical conserved gene.
Os01g0192300	2.01418	5.07941e-08	1.22975e-05	up	Hypothetical conserved gene.
Os03g0170800	86.2	2.77618e-07	4.09003e-05	up	Hypothetical conserved gene.
Os10g0208500	2.08158	1.27421e-06	0.000128108	up	Hypothetical conserved gene.
Os03g0692100	6.70565	1.49828e-06	0.000145487	up	Hypothetical conserved gene.
Os07g0438700	2.43135	8.96262e-06	0.000613266	up	Hypothetical conserved gene.
Os07g0676400	2.88161	1.49776e-07	2.63984e-05	up	Hypothetical conserved gene.
Os03g0831700	4.59856	3.25284e-07	4.58321e-05	up	Hypothetical conserved gene.
Os01g0882100	2.45026	9.95703e-06	0.000669706	up	Hypothetical conserved gene.
Os12g0139700	6.99065	9.89361e-06	0.000665657	up	Hypothetical conserved gene.
Os06g0677000	17	5.72346e-07	6.96289e-05	up	Hypothetical conserved gene.
Os12g0106100	3.19128	4.71094e-08	1.1685e-05	up	Hypothetical conserved gene.
Os02g0109501	2.27897	8.24077e-07	9.14785e-05	up	Hypothetical conserved gene.
Os12g0165900	2.24748	1.84034e-11	6.36026e-08	up	Hypothetical conserved gene.
Os10g0484900	2.41802	5.50002e-06	0.000411582	up	Hypothetical conserved gene.
Os11g0141100	5.59314	2.4361e-06	0.000212428	up	Hypothetical conserved gene.
Os11g0668300	2.68429	1.75344e-07	2.93815e-05	up	Hypothetical conserved gene.
Os01g0608000	11.6518	1.08651e-07	2.08716e-05	up	Hypothetical conserved gene.
Os02g0332450	4.37259	1.4102e-07	2.52633e-05	up	Hypothetical conserved gene.
Os12g0137000	5.88517	1.17513e-11	5.07661e-08	up	Hypothetical conserved gene.
Os10g0481000	2.31015	2.2396e-06	0.000198676	up	Hypothetical conserved gene.
Os08g0111500	9.56	2.15521e-06	0.000193051	up	Hypothetical conserved gene.
Os04g0624701	3.85188	5.84587e-06	0.000433009	up	Hypothetical conserved gene.
Os12g0169100	6.18436	1.16105e-07	2.1897e-05	up	Hypothetical conserved gene.
Os02g0773600	2.86313	2.54533e-09	1.30969e-06	up	Hypothetical conserved gene.
Os01g0710100	4.09295	3.99582e-07	5.33063e-05	up	Hypothetical conserved gene.
Os10g0202900	4.47785	1.29737e-09	7.79781e-07	up	Hypothetical conserved gene.
Os01g0745700	3.48361	2.35671e-07	3.64286e-05	up	Hypothetical conserved gene.
Os09g0499300	3.79095	8.39259e-08	1.7351e-05	up	Hypothetical conserved gene.
Os03g0280700	3.11594	6.72074e-06	0.000484823	up	Hypothetical conserved gene.
Os07g0451101	18.4457	1.69797e-08	5.48431e-06	up	Hypothetical conserved gene.
Os03g0314750	2.09553	1.38066e-06	0.000136493	up	Hypothetical conserved gene.
Os02g0779400	91.2	1.11476e-06	0.000115753	up	Hypothetical conserved gene.
Os08g0205800	3.7256	6.70757e-07	7.8162e-05	up	Hypothetical conserved gene.
Os11g0586300	2.20795	3.53522e-08	9.59515e-06	up	Hypothetical conserved gene.
Os12g0245700	14.0301	3.11645e-08	8.79228e-06	up	Hypothetical conserved gene.
Os12g0281600	3.13681	5.33111e-07	6.60177e-05	up	Hypothetical conserved gene.
Os01g0876400	2.75896	3.47541e-07	4.81246e-05	up	Hypothetical conserved gene.
Os11g0668300	2.10976	7.05362e-07	8.12252e-05	up	Hypothetical conserved gene.
Os05g0532500	3.10977	6.79979e-06	0.000489674	up	Hypothetical conserved gene.
Os12g0431700	5.76662	3.74233e-07	5.09531e-05	up	Hypothetical conserved gene.
Os11g0582000	2.89275	8.25219e-06	0.000574706	up	Hypothetical conserved gene.
Os01g0661650	3.50726	2.66042e-08	7.79468e-06	up	Hypothetical conserved gene.
Os06g0721600	2.25582	8.20943e-09	3.23021e-06	up	Hypothetical conserved gene.
Os02g0642600	14.7391	1.38738e-07	2.4973e-05	up	Hypothetical conserved gene.
Os11g0668300	2.92427	7.70165e-06	0.000542613	up	Hypothetical conserved gene.
Os03g0831000	85.2	3.25554e-06	0.000269437	up	Hypothetical conserved gene.
Os05g0136100	2.13394	1.63172e-06	0.000155388	up	Hypothetical conserved gene.
Os01g0531400	2.0206	2.03669e-06	0.000185274	up	Hypothetical conserved gene.
Os01g0778100	3.99774	1.18311e-06	0.000121052	up	Hypothetical conserved gene.
Os03g0431600	2.70674	6.33482e-07	7.49538e-05	up	Hypothetical conserved gene.
Os10g0104500	70.7	3.16265e-06	0.000263484	up	Hypothetical conserved gene.
Os09g0509400	3.08911	3.7237e-06	0.00030004	up	Hypothetical conserved gene.
Os10g0132500	4.45685	4.63493e-08	1.1553e-05	up	Hypothetical conserved gene.
Os04g0115900	12.3043	2.51489e-06	0.000218243	up	Hypothetical conserved gene.
Os06g0340200	2.18135	3.67929e-06	0.000297097	up	Hypothetical conserved gene.
Os10g0401100	12.5029	1.18794e-08	4.27289e-06	up	Hypothetical conserved gene.
Os02g0776600	5.08619	3.58082e-09	1.7208e-06	up	Hypothetical conserved gene.
Os05g0497150	2.03839	1.36188e-08	4.72639e-06	up	Hypothetical conserved gene.
Os06g0168901	2.43183	3.05072e-07	4.37938e-05	up	Hypothetical conserved gene.
Os02g0791300	3.72955	7.52683e-08	1.61265e-05	up	Hypothetical conserved gene.
Os01g0923950	3.00328	6.65604e-07	7.77141e-05	up	Hypothetical gene.
Os01g0225700	3.50891	1.09991e-07	2.10404e-05	up	Hypothetical gene.
Os12g0604300	3.01248	2.9601e-12	2.79005e-08	up	Hypothetical gene.
Os02g0110101	2.40893	9.54651e-07	0.000102755	up	Hypothetical gene.
Os01g0252400	14.2159	4.48743e-08	1.12586e-05	up	Hypothetical gene.
Os05g0108450	2.62032	6.17494e-07	7.36099e-05	up	Hypothetical gene.
Os05g0159250	2.07427	1.47504e-07	2.61201e-05	up	Hypothetical gene.
Os03g0294032	3.03316	9.56591e-08	1.91375e-05	up	Hypothetical gene.
Os01g0831250	2.04797	3.68526e-06	0.000297347	up	Hypothetical gene.
Os05g0479025	3.41632	9.65574e-08	1.92726e-05	up	Hypothetical gene.
Os01g0661700	3.87751	1.537e-07	2.67379e-05	up	Hypothetical gene.
Os03g0194450	2.56094	5.63885e-08	1.32197e-05	up	Hypothetical gene.
Os04g0442700	2.56183	4.20888e-07	5.54309e-05	up	Hypothetical gene.
Os01g0225700	9.17791	1.38592e-06	0.000136916	up	Hypothetical gene.
Os08g0434150	2.65998	3.48905e-07	4.82651e-05	up	Hypothetical gene.
Os06g0310801	2.76851	2.69521e-08	7.86053e-06	up	Hypothetical gene.
Os02g0259850	4.50935	5.00942e-06	0.000380429	up	Hypothetical gene.
Os05g0587300	2.08237	2.86434e-09	1.43641e-06	up	Hypothetical gene.
Os09g0425500	11.2271	3.22853e-08	9.02109e-06	up	Hypothetical gene.
Os10g0564150	2.31078	1.54798e-06	0.000149333	up	Hypothetical gene.
Os02g0744150	2.5435	9.29334e-07	0.000100473	up	Hypothetical gene.
Os09g0440851	4.11333	1.01684e-12	2.12997e-08	up	Hypothetical gene.
Os03g0268750	4.31841	2.09807e-10	2.18622e-07	up	Hypothetical gene.
Os04g0481050	4.3853	1.78899e-06	0.000167103	up	Hypothetical gene.
Os05g0552550	4.15139	1.29597e-06	0.000129823	up	Hypothetical gene.
Os06g0555900	2.18603	1.03851e-07	2.02584e-05	up	Hypothetical gene.
Os05g0108450	2.2146	1.72333e-09	9.71067e-07	up	Hypothetical gene.
Os12g0235650	2.47348	2.1481e-06	0.000192754	up	Hypothetical gene.
Os01g0968350	20.4101	4.71817e-08	1.16908e-05	up	Hypothetical gene.
Os08g0169100	5.7512	3.33199e-07	4.65898e-05	up	Hypothetical gene.
Os09g0313550	2.24283	3.16587e-09	1.55411e-06	up	Hypothetical gene.
Os01g0716450	2.4409	5.95361e-07	7.16719e-05	up	Hypothetical gene.
Os04g0210250	3.76516	1.161e-07	2.1897e-05	up	Hypothetical gene.
Os02g0131050	3.02739	4.67846e-09	2.09306e-06	up	Hypothetical gene.
Os11g0147150	3.72735	5.36814e-07	6.63772e-05	up	Hypothetical gene.
Os04g0562650	2.5923	1.95641e-06	0.000179626	up	Hypothetical gene.
Os05g0457300	6.65552	4.15046e-11	1.00976e-07	up	Hypothetical gene.
Os11g0128932	3.06038	1.47693e-07	2.61425e-05	up	Hypothetical gene.
Os06g0624750	7.57143	7.1392e-06	0.000508989	up	Hypothetical protein.
Os07g0115500	4.59676	1.94242e-07	3.15537e-05	up	Hypothetical protein.
Os01g0160150	2.05239	1.43925e-07	2.56529e-05	up	Hypothetical protein.
Os05g0524525	3.97416	2.09112e-07	3.33822e-05	up	Hypothetical protein.
Os01g0731150	5.12092	2.20402e-06	0.000196529	up	Hypothetical protein.
Os08g0434500	4.20712	2.18219e-08	6.70872e-06	up	Hypothetical protein.
Os05g0319875	6.67	8.35755e-06	0.000580484	up	Hypothetical protein.
Os01g0740700	3.34621	3.10285e-07	4.42511e-05	up	Hypothetical protein.
Os10g0420266	2.42507	4.8727e-06	0.00037209	up	Hypothetical protein.
Os05g0525701	5.30145	8.78323e-08	1.79726e-05	up	Hypothetical protein.
Os10g0530800	4.1098	9.02636e-08	1.83322e-05	up	Hypothetical protein.
Os03g0624700	14.7717	3.70638e-08	9.93699e-06	up	Hypothetical protein.
Os05g0524900	8.90196	3.87773e-06	0.000309884	up	Hypothetical protein.
Os07g0209201	3.52312	2.19236e-07	3.45975e-05	up	Hypothetical protein.
Os04g0681625	2.31135	7.07858e-07	8.13876e-05	up	Hypothetical protein.
Os06g0257050	3.89173	5.58967e-08	1.3149e-05	up	Hypothetical protein.
Os06g0587300	95.4	6.18103e-07	7.3614e-05	up	Hypothetical protein.
Os04g0454250	105.3	1.71597e-07	2.89171e-05	up	Hypothetical protein.
Os08g0316900	3.45089	2.17188e-10	2.21788e-07	up	Hypothetical protein.
Os06g0567950	5.39216	1.55171e-08	5.19393e-06	up	Hypothetical protein.
Os05g0550200	11.9674	8.48152e-06	0.00058752	up	Hypothetical protein.
Os12g0477050	10.6056	9.19191e-06	0.000626478	up	Hypothetical protein.
Os04g0412000	2.02663	8.31089e-11	1.42426e-07	up	Hypothetical protein.
Os05g0524900	10.3725	4.11112e-08	1.06895e-05	up	Hypothetical protein.
Os10g0450800	7.03889	1.1045e-07	2.10895e-05	up	Hypothetical protein.
Os01g0216600	3.07599	4.73238e-09	2.10808e-06	up	Hypothetical protein.
Os09g0491238	3.81596	4.47612e-10	3.43133e-07	up	Hypothetical protein.
Os01g0249050	4.57317	1.37217e-09	8.13528e-07	up	Hypothetical protein.
Os02g0710201	4.41254	1.24803e-07	2.30756e-05	up	Hypothetical protein.
Os09g0536350	11.7986	1.24034e-08	4.40786e-06	up	Hypothetical protein.
Os08g0449901	127.3	8.52082e-09	3.31189e-06	up	Hypothetical protein.
Os07g0599300	7.97079	4.08563e-09	1.90169e-06	up	Hypothetical protein.
Os03g0744200	5.1103	6.49479e-09	2.70164e-06	up	Hypothetical protein.
Os05g0587350	2.13906	5.32484e-08	1.27299e-05	up	Hypothetical protein.
Os01g0937012	7.27237	5.97017e-08	1.36945e-05	up	Hypothetical protein.
Os10g0497750	4.81538	1.14849e-09	7.04595e-07	up	Hypothetical protein.
Os08g0456600	13.1071	8.36034e-06	0.00058058	up	Hypothetical protein.
Os04g0652550	3.37783	1.27041e-08	4.48016e-06	up	Hypothetical protein.
Os11g0422100	2.39801	3.95643e-06	0.000314877	up	Hypothetical protein.
Os05g0524525	4.02055	4.48353e-08	1.12586e-05	up	Hypothetical protein.
Os11g0151200	3.42795	4.86541e-07	6.18009e-05	up	Hypothetical protein.
Os11g0303800	4.64362	1.54974e-09	8.93899e-07	up	Hypothetical protein.
Os04g0674500	2.79389	3.37356e-09	1.63828e-06	up	Hypothetical protein.
Os01g0849000	3.92742	3.07296e-08	8.69917e-06	up	Hypothetical protein.
Os10g0370600	4.20568	2.59435e-10	2.41784e-07	up	Hypothetical protein.
Os05g0276750	3.40658	3.42398e-08	9.39155e-06	up	Hypothetical protein.
Os07g0688700	3.37361	2.2466e-07	3.50796e-05	up	Hypothetical protein.
Os08g0442900	17.0357	9.80232e-08	1.9469e-05	up	Hypothetical protein.
Os07g0241050	18.4366	4.17581e-07	5.51179e-05	up	Hypothetical protein.
Os07g0510866	3.35275	1.5374e-08	5.15854e-06	up	Hypothetical protein.
Os05g0525200	3.32963	5.29555e-08	1.26801e-05	up	Hypothetical protein.
Os10g0453000	6.79987	4.89563e-09	2.16849e-06	up	Hypothetical protein.
Os12g0157066	2.7529	2.85322e-07	4.18126e-05	up	Hypothetical protein.
Os01g0841650	2.2852	7.41931e-07	8.43464e-05	up	Hypothetical protein.
Os01g0914200	4.54189	2.87333e-07	4.20478e-05	up	Hypothetical protein.
Os09g0567600	5.64134	3.63555e-10	2.95636e-07	up	Hypothetical protein.
Os11g0249700	7.44901	4.46363e-08	1.12192e-05	up	Hypothetical protein.
Os12g0118850	10.7149	1.04486e-07	2.0361e-05	up	Hypothetical protein.
Os09g0255366	2.21612	6.65476e-06	0.000481151	up	Hypothetical protein.
Os06g0660300	2.45292	2.26828e-06	0.00020062	up	Hypothetical protein.
Os04g0155750	12.0116	9.18813e-09	3.48864e-06	up	Hypothetical protein.
Os01g0556650	2.91126	1.71291e-07	2.88878e-05	up	Hypothetical protein.
Os01g0545550	81.3	1.62511e-06	0.000154936	up	Hypothetical protein.
Os04g0418800	2.93862	6.50714e-06	0.000473163	up	Hypothetical protein.
Os02g0606400	3.08312	1.53407e-07	2.67217e-05	up	Hypothetical protein.
Os01g0795250	13.3261	9.8015e-07	0.000104604	up	Hypothetical protein.
Os06g0481200	2.39598	6.0854e-07	7.27098e-05	up	Hypothetical protein.
Os07g0209201	3.20186	1.00442e-07	1.98078e-05	up	Hypothetical protein.
Os10g0530750	3.99458	8.27875e-06	0.000576169	up	Hypothetical protein.
Os05g0521650	2.5872	1.31187e-07	2.39401e-05	up	Hypothetical protein.
Os06g0725550	4.01612	1.19037e-07	2.22977e-05	up	Hypothetical protein.
Os08g0118300	3.23813	2.31613e-11	7.35592e-08	up	Hypothetical protein.
Os09g0455300	7.31549	7.09018e-08	1.55333e-05	up	INDEHISCENT protein.
Os07g0592600	2.07955	9.7262e-07	0.000103988	up	Indole-3-acetic acid (IAA)-amido synthetaseAuxin signaling and defense signaling in a pathogen-nonspecific manner
Os07g0592600	2.16856	2.57147e-09	1.31986e-06	up	Indole-3-acetic acid (IAA)-amido synthetaseAuxin signaling and defense signaling in a pathogen-nonspecific manner
Os06g0555500	5.34624	5.8015e-07	7.03318e-05	up	Initiator tRNA phosphoribosyl transferase family protein.
Os11g0186800	2.42541	2.14292e-06	0.000192478	up	inorganic phosphate cotransporter.
Os02g0466400	81.1	5.96653e-06	0.000440149	up	Inositol phosphate kinase.
Os01g0892800	2.69004	4.12367e-08	1.06945e-05	up	Integrin-linked protein kinase domain containing protein.
Os01g0332100	2.21104	6.6179e-06	0.000479154	up	Invertase.
Os05g0568100	11.0126	6.63481e-07	7.76194e-05	up	Iron sulfur cluster assembly protein 1mitochondrial precursor (Iron sulfur cluster scaffold protein 1).
Os02g0650300	8.65794	8.88234e-08	1.81285e-05	up	Iron-phytosiderophore transporter YSL15.
Os07g0529000	7.0461	1.39252e-06	0.000137404	up	Isocitrate lyase (Fragment).
Os01g0106400	5.8659	4.60857e-07	5.93197e-05	up	Isoflavone reductase homolog IRL (EC 1.3.1.-).
Os01g0382450	4.42321	1.55926e-07	2.69893e-05	up	Kinesin heavy chain (Fragment).
Os05g0459400	2.83337	9.88104e-07	0.000105155	up	kinesin motor protein-related.
Os01g0243100	2.03478	4.07533e-09	1.89964e-06	up	Kinesin.
Os02g0742900	4.0148	4.09096e-09	1.90204e-06	up	Kinesin-like protein.
Os05g0397900	3.0473	1.71707e-10	2.0116e-07	up	Kinesinmotor region domain containing protein.
Os03g0273200	6.99298	2.49065e-07	3.78639e-05	up	Laccase (EC 1.10.3.2).
Os11g0708100	3.46929	2.2604e-06	0.00020018	up	Laccase-22.
Os01g0850550	2.95336	2.87583e-06	0.000243701	up	Laccase-6.
Os07g0510900	3.33541	3.2813e-08	9.11633e-06	up	L-ascorbate oxidase.
Os01g0843800	3.81398	1.26883e-06	0.000127723	up	L-ascorbate oxidase.
Os01g0843800	2.69921	1.60292e-06	0.000153314	up	L-ascorbate oxidase.
Os07g0510833	5.48736	4.57649e-09	2.06302e-06	up	L-ascorbate oxidase.
Os04g0589800	25.2391	1.14609e-08	4.15843e-06	up	Late embryogenesis abundant (LEA) group 1 family protein.
Os01g0314800	2.59538	4.07602e-07	5.41627e-05	up	Late embryogenesis abundant protein 3 family protein.
Os01g0705200	3.74226	9.27134e-07	0.000100366	up	Late embryogenesis abundant protein repeat containing protein.
Os03g0168100	9.53734	5.74128e-08	1.33392e-05	up	Late embryogenesis abundant protein repeat containing protein.
Os02g0250600	3.55971	2.58653e-07	3.88477e-05	up	Late embryogenesis abundant protein repeat containing protein.
Os03g0168100	6.75157	7.85254e-07	8.8017e-05	up	Late embryogenesis abundant protein repeat containing protein.
Os09g0482550	5.07373	1.97897e-08	6.21761e-06	up	Late embryogenesis abundant proteinLEA-18 domain containing protein.
Os10g0162600	4.04683	4.97227e-06	0.000378092	up	Lateral organ boundariesLOB domain containing protein.
Os05g0542500	7.66965	4.78749e-06	0.000366595	up	LEA-like protein.
Os08g0514100	2.73879	2.95588e-06	0.000248958	up	Legume lectinbeta chain domain containing protein.
Os08g0334300	28.1961	1.80222e-08	5.76269e-06	up	Legume lectinbeta chain domain containing protein.
Os12g0601000	2.59773	1.26759e-08	4.47784e-06	up	Leucine Rich Repeat family proteinexpressed.
Os05g0393100	3.20938	4.09375e-06	0.00032425	up	Leucine-rich repeatN-terminal domain containing protein.
Os06g0478600	8.31214	1.02203e-06	0.000108127	up	Leucine-rich repeatN-terminal domain containing protein.
Os04g0605300	2.00657	1.3544e-07	2.45714e-05	up	Leucine-rich repeattypical subtype containing protein.
Os07g0498400	3.57545	5.83598e-10	4.20034e-07	up	Leucine-rich repeattypical subtype domain containing protein.
Os01g0832600	7.99398	2.50622e-06	0.000217627	up	Leucoanthocyanidin dioxygenase-like protein.
Os03g0304800	3.2478	1.14529e-09	7.04595e-07	up	Lg106-like family protein.
Os03g0655400	2.14026	1.746e-07	2.92805e-05	up	LIP5.
Os01g0651800	3.52262	2.48599e-12	2.77563e-08	up	Lipaseclass 3 family protein.
Os01g0618700	2.8403	5.68999e-07	6.93234e-05	up	Lipaseclass 3 family protein.
Os07g0642200	2.58088	3.61907e-09	1.73646e-06	up	LipaseGDSL domain containing protein.
Os02g0292600	4.07976	2.43664e-07	3.72478e-05	up	LipaseGDSL domain containing protein.
Os06g0531900	2.52713	1.53853e-11	5.74832e-08	up	LipaseGDSL domain containing protein.
Os03g0310000	5.0979	3.27691e-13	1.23546e-08	up	LipaseGDSL domain containing protein.
Os05g0210400	4.66316	3.19514e-07	4.51635e-05	up	LipaseGDSL domain containing protein.
Os07g0642200	3.35863	1.34064e-10	1.80247e-07	up	LipaseGDSL domain containing protein.
Os07g0668300	5.33481	7.83033e-13	2.05018e-08	up	LipaseGDSL domain containing protein.
Os07g0668300	6.74587	9.28074e-09	3.51822e-06	up	LipaseGDSL domain containing protein.
Os07g0175500	2.14782	2.72098e-07	4.03596e-05	up	lipid binding protein.
Os11g0245500	2.26914	1.41889e-07	2.5364e-05	up	Lipid-binding START domain containing protein.
Os11g0575600	3.31907	1.49389e-08	5.06169e-06	up	Lipoxygenase (Fragment).
Os01g0644200	18.7486	1.96842e-08	6.19856e-06	up	Little protein 1.
Os04g0618600	2.1138	6.86769e-06	0.000493364	up	Long hypocotyl in far-red 1 (bHLH-like protein HFR1) (Reduced phytochrome signaling) (Basic helix-loop-helix FBI1 protein) (Basic helix-loop-helix protein 26) (bHLH26) (AtbHLH026) (Reduced sensitivity to far-red light).
Os01g0511600	2.08759	1.46733e-06	0.000143287	up	lrgB-like family protein.
Os09g0547500	3.39853	1.80132e-07	2.99538e-05	up	Lysine decarboxylase-like proteinResponse to abiotic stresses
Os11g0134900	19.1197	9.67783e-08	1.9287e-05	up	Major facilitator superfamily antiporter.
Os11g0151500	4.47842	5.15028e-06	0.000389131	up	Major facilitator superfamily protein.
Os03g0114800	2.27202	2.42734e-07	3.71539e-05	up	Major Facilitator superfamily protein.
Os08g0531100	3.34273	1.10288e-06	0.000114835	up	MAP65/ASE1 family protein.
Os04g0373400	2.94499	4.25699e-06	0.000334243	up	MATE efflux family proteinexpressed.
Os01g0603300	2.80152	1.82123e-06	0.000169579	up	MCB2 protein.
Os01g0695700	4.05931	2.79174e-07	4.10713e-05	up	MDR-like ABC transporter.
Os01g0695700	3.29412	2.60432e-08	7.68187e-06	up	MDR-like ABC transporter.
Os02g0274900	2.07167	2.46764e-09	1.27604e-06	up	metabolite transport protein csbC.
Os03g0288000	2.24765	6.35268e-07	7.51027e-05	up	Metallothionein.
Os12g0570700	3.288	3.94654e-06	0.00031415	up	Metallothionein-like protein type 1.
Os02g0649900	2.64012	2.19005e-06	0.00019562	up	Metal-nicotianamine (NA) transporterFe and Mn transport to the endosperm
Os02g0649900	5.22309	3.50845e-07	4.8485e-05	up	Metal-nicotianamine (NA) transporterFe and Mn transport to the endosperm
Os02g0649900	5.88911	7.32113e-08	1.58221e-05	up	Metal-nicotianamine (NA) transporterFe and Mn transport to the endosperm
Os12g0612500	3.84465	5.17416e-06	0.000390654	up	Methyltransferase small domain containing protein.
Os04g0642100	2.21983	3.3613e-07	4.68886e-05	up	Microtubule-associated protein EB1.
Os02g0739900	3.24386	2.18132e-07	3.44516e-05	up	microtubule-associated protein TORTIFOLIA1.
Os04g0461300	2.28689	3.92291e-06	0.000312629	up	MIKC-type MADS-box transcription factor WM30.
Os03g0305600	175.7	3.76061e-09	1.77835e-06	up	Mitochondrial import inner membrane translocasesubunit Tim17/22 family protein.
Os03g0415500	8.01258	7.31132e-06	0.000519208	up	Mitochondrial import inner membrane translocasesubunit Tim17/22 family protein.
Os05g0392700	2.28861	5.72875e-07	6.96729e-05	up	Mitochondrial substrate carrier family protein.
Os03g0265300	7.4812	6.66444e-06	0.000481664	up	Mitochondrial substrate carrier family protein.
Os08g0421800	2.85852	2.69545e-06	0.000231173	up	Mitogen-activated protein kinase kinase kinase 1 (EC 2.7.1.-) (Arabidospsis NPK1-related protein kinase 1). Splice isoform 1S.
Os02g0193600	5.12458	1.14701e-07	2.17409e-05	up	Mitotic checkpoint serine/threonine protein kinaseBub1 domain containing protein.
Os02g0639600	3.26652	5.23918e-09	2.27744e-06	up	MLD (Degenerative spermatocyte homolog 1lipid desaturase) (Migration-inducing gene 15 protein) (Sphingolipid delta 4 desaturase protein DES1).
Os02g0639600	2.93197	9.4651e-12	4.70152e-08	up	MLD (Degenerative spermatocyte homolog 1lipid desaturase) (Migration-inducing gene 15 protein) (Sphingolipid delta 4 desaturase protein DES1).
Os01g0315600	17.1193	1.63529e-08	5.37822e-06	up	Monoglyceride lipase.
Os06g0498800	5.81291	1.23857e-08	4.40536e-06	up	MOTHER of FT and TF1 protein.
Os12g0621900	2.45193	5.55943e-06	0.000415203	up	Mov34/MPN/PAD-1 family proteinexpressed.
Os05g0506000	4.50818	7.81228e-08	1.65725e-05	up	MS5-like protein (Fragment).
Os01g0504500	3.05032	6.00248e-08	1.37412e-05	up	Multi antimicrobial extrusion protein MatE family protein.
Os10g0345100	2.48737	4.77592e-07	6.1038e-05	up	Multi antimicrobial extrusion protein MatE family protein.
Os06g0495500	4.48504	4.88953e-06	0.000373307	up	Multi antimicrobial extrusion protein MatE family protein.
Os03g0626700	2.30625	2.40063e-07	3.68876e-05	up	Multi antimicrobial extrusion protein MatE family protein.
Os08g0480000	2.51052	3.61089e-12	3.11832e-08	up	Multi antimicrobial extrusion protein MatE family protein.
Os06g0495500	10.4421	2.11875e-13	1.09837e-08	up	Multi antimicrobial extrusion protein MatE family protein.
Os06g0495500	5.56427	8.708e-12	4.60567e-08	up	Multi antimicrobial extrusion protein MatE family protein.
Os01g0180600	4.91278	5.51328e-07	6.76875e-05	up	MutS homolog 7 (Fragment).
Os09g0401000	3.48944	1.61602e-07	2.77631e-05	up	Myb factor.
Os08g0151300	2.75698	1.85113e-07	3.0513e-05	up	Myb transcription factor domain containing protein.
Os11g0180900	2.54455	4.39489e-07	5.71188e-05	up	Myb transcription factor domain containing protein.
Os09g0532900	2.60221	2.72113e-06	0.00023302	up	Myb transcription factor domain containing protein.
Os07g0497500	3.75551	5.82641e-12	3.93313e-08	up	MYB transcription factor.
Os03g0773100	4.1664	1.70695e-06	0.000161145	up	Myb/SANT domain protein.
Os08g0428200	22.5435	9.97112e-11	1.56047e-07	up	Myb51 protein.
Os12g0586300	2.02793	2.97648e-07	4.3041e-05	up	Myb-like DNA-binding domainSHAQKYF class domain containing protein.
Os12g0586300	2.5962	1.10196e-06	0.000114768	up	Myb-like DNA-binding domainSHAQKYF class domain containing protein.
Os03g0215700	2.54646	1.65846e-11	5.92933e-08	up	Myosin II heavy chain-like family protein.
Os03g0215700	2.39401	7.24762e-10	4.97583e-07	up	Myosin II heavy chain-like family protein.
Os01g0816100	12.4286	8.11368e-06	0.000566677	up	NAC domain protein.
Os09g0127300	3.41583	1.11973e-11	5.00686e-08	up	NAD(P)-binding domain containing protein.
Os08g0526100	2.99164	7.49789e-08	1.61e-05	up	NAD(P)-binding domain containing protein.
Os09g0127300	3.9732	2.02364e-09	1.10138e-06	up	NAD(P)-binding domain containing protein.
Os02g0123500	2.53073	1.08003e-07	2.08041e-05	up	NADP-dependent D-sorbitol-6-phosphate dehydrogenase.
Os12g0541300	8.23755	6.80911e-08	1.50866e-05	up	NADPH oxidaseRespiratory burst oxidase homologEthylene-induced aerenchyma formation in roots under oxygen-deficient conditions
Os10g0477600	2.06302	9.72517e-07	0.000103988	up	NAM / CUC2-like protein.
Os07g0117400	78.4	5.58628e-06	0.000416684	up	NB-ARC domain containing protein.
Os03g0599000	4.24668	1.8157e-06	0.00016914	up	NB-ARC domain containing protein.
Os06g0524900	6.50455	1.13053e-06	0.000116948	up	NB-ARC domain containing protein.
Os08g0246300	3.9979	2.38186e-06	0.000208928	up	NB-ARC domain containing protein.
Os07g0294100	7.90977	1.9155e-06	0.000176691	up	NB-ARC domain containing protein.
Os12g0552900	2.17628	3.6616e-10	2.97172e-07	up	NB-ARC domain containing protein.
Os12g0481400	2.11597	1.29255e-06	0.000129606	up	NBS-LRR disease resistance protein homologue.
Os02g0306401	11.754	5.42574e-08	1.28876e-05	up	Nicotianamine aminotransferase A.
Os02g0306401	8.69573	1.02199e-06	0.000108127	up	Nicotianamine aminotransferase A.
Os02g0306401	6.41948	8.2504e-08	1.71596e-05	up	Nicotianamine aminotransferase A.
Os02g0306401	9.84265	3.43586e-07	4.76405e-05	up	Nicotianamine aminotransferase A.
Os06g0345200	2.27627	2.81861e-06	0.000239882	up	Nicotianamine aminotransferase.
Os03g0307300	36.8031	2.55712e-07	3.85776e-05	up	Nicotianamine synthase 1 (EC 2.5.1.43) (S-adenosyl-L-methionine:S- adenosyl-L-methionine:S-adenosyl-methionine 3-amino-3- carboxypropyltransferase 1) (OsNAS1).
Os03g0307200	36.4982	2.55678e-07	3.85776e-05	up	Nicotianamine synthase 2Nicotianamine biosynthesis
Os03g0850100	2.13534	9.28828e-06	0.0006319	up	NLI interacting factor domain containing protein.
Os03g0624600	5.75273	6.19594e-08	1.408e-05	up	No apical meristem (NAM) protein domain containing protein.
Os01g0672100	3.07162	1.60937e-08	5.31403e-06	up	No apical meristem (NAM) protein domain containing protein.
Os05g0563000	2.06097	2.95745e-08	8.45876e-06	up	No apical meristem (NAM) protein domain containing protein.
Os01g0672100	2.5893	1.43938e-07	2.56529e-05	up	No apical meristem (NAM) protein domain containing protein.
Os05g0421600	3.9188	2.21982e-07	3.48583e-05	up	No apical meristem (NAM) protein domain containing protein.
Os06g0131700	2.0413	8.25704e-06	0.000574851	up	No apical meristem (NAM) protein domain containing protein.
Os01g0202800	3.23484	1.64861e-07	2.81596e-05	up	NOD26-like membrane integral protein ZmNIP1-1.
Os06g0228200	2.3379	7.64508e-07	8.61106e-05	up	NOD26-like membrane integral protein.
Os03g0363950	2.11487	7.16549e-07	8.20877e-05	up	nodulation protein-related.
Os10g0112600	2.20675	2.0183e-07	3.23829e-05	up	Nonaspanin (TM9SF) family protein.
Os10g0317900	2.09256	8.52347e-07	9.40127e-05	up	Non-protein coding transcript.
Os04g0137201	5.75448	5.81666e-08	1.34465e-05	up	Non-protein coding transcript.
Os06g0295500	2.05215	1.21489e-07	2.2626e-05	up	Non-protein coding transcript.
Os02g0736100	2.18615	8.86014e-08	1.80921e-05	up	Non-protein coding transcript.
Os05g0186300	3.14964	4.99174e-07	6.29046e-05	up	Non-protein coding transcript.
Os04g0137201	2.42283	2.84646e-08	8.1865e-06	up	Non-protein coding transcript.
Os05g0477600	3.58855	7.38906e-07	8.4141e-05	up	Non-protein coding transcript.
Os04g0137201	6.31261	4.02738e-08	1.04981e-05	up	Non-protein coding transcript.
Os12g0115100	2.4607	8.61009e-07	9.47414e-05	up	Nonspecific lipid-transfer protein 1 precursor (LTP 1) (PAPI).
Os05g0550600	101.1	1.28261e-07	2.35471e-05	up	Nonspecific lipid-transfer protein 2 (nsLTP2) (7 kDa lipid transfer protein).
Os06g0539500	7.1563	2.04224e-13	1.09837e-08	up	Non-specific lipid-transfer protein.
Os03g0852800	6.20917	1.12251e-07	2.13944e-05	up	NPC4 (NONSPECIFIC PHOSPHOLIPASE C4)%3B hydrolaseacting on ester bonds / phospholipase C.
Os03g0696300	2.46517	3.12814e-07	4.44894e-05	up	nuclear transcription factor Y subunit A-1.
Os09g0456900	2.79864	1.28057e-08	4.5013e-06	up	Nucleic acid-bindingOB-fold domain containing protein.
Os07g0658600	11.1066	7.25183e-07	8.28285e-05	up	Nucleoid DNA-binding-like protein.
Os07g0658600	7.24613	5.07701e-07	6.36503e-05	up	Nucleoid DNA-binding-like protein.
Os03g0625300	5.73505	2.93404e-06	0.000247471	up	nucleotide binding protein.
Os03g0625300	16.1413	4.85476e-08	1.19276e-05	up	nucleotide binding protein.
Os01g0920700	2.69715	5.18212e-06	0.000390981	up	Nucleotide-diphospho-sugar transferase domain containing protein.
Os04g0399300	2.41427	1.29467e-06	0.000129724	up	Nudix hydrolase 13mitochondrial precursor (EC 3.6.1.-) (AtNUDT13).
Os04g0399300	2.19153	7.20068e-07	8.23576e-05	up	Nudix hydrolase 13mitochondrial precursor (EC 3.6.1.-) (AtNUDT13).
Os04g0569100	2.0364	9.68802e-07	0.00010374	up	OCL1 homeobox protein.
Os04g0569100	13.4524	3.16678e-06	0.000263722	up	OCL1 homeobox protein.
Os06g0125400	2.04763	3.57229e-06	0.00028981	up	Oligopeptide transporter 9.
Os04g0491200	3.50047	3.2466e-09	1.58487e-06	up	Oligopeptide transporter domain containing protein.
Os07g0416900	2.05814	1.47381e-06	0.000143547	up	Omega-6 fatty acid desaturaseendoplasmic reticulum isozyme 2 (EC 1.14.19.-).
Os01g0658900	2.0151	3.82587e-10	3.06385e-07	up	OSBZ8.
Os04g0415800	8.3181	6.62084e-12	3.93313e-08	up	OSIGBa0092M08.2 protein.
Os04g0429050	13.8478	1.53114e-07	2.67217e-05	up	OSIGBa0093L02.1 protein.
Os04g0458300	3.14295	1.06422e-07	2.06022e-05	up	OSIGBa0097P08.2 protein.
Os04g0458300	2.43302	2.07396e-06	0.00018784	up	OSIGBa0097P08.2 protein.
Os04g0508500	4.62268	4.85031e-10	3.63093e-07	up	OSIGBa0101P20.9 protein.
Os04g0508500	8.05334	1.04822e-07	2.04049e-05	up	OSIGBa0101P20.9 protein.
Os04g0494800	2.7791	5.94873e-06	0.000439216	up	OSIGBa0103O01.11 protein.
Os04g0347200	11.4175	4.896e-08	1.20076e-05	up	OSIGBa0111I14.7 protein.
Os04g0347200	83.2	4.35673e-06	0.000340527	up	OSIGBa0111I14.7 protein.
Os04g0347200	8.57612	1.73119e-08	5.56561e-06	up	OSIGBa0111I14.7 protein.
Os04g0347200	11.2514	3.76271e-08	1.00352e-05	up	OSIGBa0111I14.7 protein.
Os02g0675400	11.9474	1.83333e-10	2.05562e-07	up	OSIGBa0111L12.2 protein.
Os02g0581200	2.22931	2.57908e-07	3.87959e-05	up	OSIGBa0115M15.3 protein.
Os04g0102500	2.05314	4.59982e-08	1.14939e-05	up	OSIGBa0123D13.3 protein.
Os04g0467901	3.91241	1.17226e-07	2.20482e-05	up	OSIGBa0128P10.5 protein.
Os02g0637000	4.37996	1.0918e-06	0.000113967	up	OSIGBa0135K14.7 protein.
Os04g0640700	2.07328	3.28783e-07	4.61434e-05	up	OSIGBa0138H21-OSIGBa0138E01.14 protein.
Os04g0569400	2.031	9.52385e-09	3.58092e-06	up	OSIGBa0139P06.9 protein.
Os04g0183300	2.86859	8.13152e-11	1.41695e-07	up	OSIGBa0140C02.5 protein.
Os04g0183300	5.19092	1.93517e-09	1.0644e-06	up	OSIGBa0140C02.5 protein.
Os04g0517000	2.53921	3.86738e-06	0.000309324	up	OSIGBa0145M07.3 protein.
Os04g0386300	3.90314	2.58206e-07	3.88126e-05	up	OSIGBa0148P16.3 protein.
Os04g0386700	4.23166	1.51698e-07	2.66227e-05	up	OSIGBa0148P16.6 protein.
Os05g0155800	17.3261	1.41752e-08	4.86883e-06	up	OSIGBa0157A06.5 protein.
Os05g0155800	61	7.8572e-06	0.000551924	up	OSIGBa0157A06.5 protein.
Os03g0663500	6.30417	4.27753e-07	5.6039e-05	up	Osmotin precursor.
Os07g0683600	2.12771	7.17409e-07	8.21179e-05	up	Osr40c1 protein.
Os07g0683900	2.24836	4.46269e-09	2.02927e-06	up	Osr40g2 protein (Fragment).
Os03g0158700	2.67505	7.00922e-10	4.86126e-07	up	P69C protein.
Os03g0847900	2.59704	2.20136e-06	0.000196334	up	PAK-box/P21-Rho-binding domain containing protein.
Os08g0388900	8.24277	2.23398e-06	0.000198391	up	para-hydroxybenzoate--polyprenyltransferase.
Os08g0408500	2.28013	3.84776e-06	0.00030812	up	Pathogenesis-related transcriptional factor and ERF domain containing protein.
Os06g0181700	169.8	3.51271e-09	1.69593e-06	up	Pathogenesis-related transcriptional factor and ERF domain containing protein.
Os08g0408500	3.30637	2.94358e-08	8.43656e-06	up	Pathogenesis-related transcriptional factor and ERF domain containing protein.
Os07g0204000	3.22242	4.73065e-07	6.06088e-05	up	Pathogenesis-related transcriptional factor/ERFDNA-binding domain containing protein.
Os04g0194600	12.1066	2.69838e-09	1.37142e-06	up	PCF1.
Os07g0522500	2.76335	3.87278e-07	5.22089e-05	up	PDR6 ABC transporter.
Os04g0553500	2.49269	3.0866e-09	1.52937e-06	up	Pectin lyase fold domain containing protein.
Os02g0130200	9.8658	5.39401e-08	1.28343e-05	up	Pectin lyase fold/virulence factor domain containing protein.
Os02g0781000	2.14088	9.208e-08	1.86009e-05	up	Pectin lyase fold/virulence factor domain containing protein.
Os07g0607400	3.57244	1.28074e-08	4.5013e-06	up	Pectin lyase fold/virulence factor domain containing protein.
Os01g0634600	9.5082	5.49936e-06	0.000411582	up	Pectin lyase fold/virulence factor domain containing protein.
Os06g0193200	3.57124	3.61318e-07	4.95035e-05	up	Pectin methylesterase 8 (Fragment).
Os07g0675100	4.14898	7.06712e-06	0.00050524	up	Pectin methylesterase isoform alpha (EC 3.1.1.11) (Fragment).
Os08g0450100	14.1438	2.10472e-08	6.52861e-06	up	Pectinesterase (EC 3.1.1.11) (Fragment).
Os01g0254300	6.85	4.92419e-08	1.20696e-05	up	Pectinesterase (EC 3.1.1.11) (Fragment).
Os10g0185400	3.06567	1.97675e-11	6.66506e-08	up	Pectinesterase inhibitor domain containing protein.
Os10g0508700	2.91983	4.39325e-07	5.71188e-05	up	Pectinesterase inhibitor domain containing protein.
Os01g0743200	5.23785	4.18352e-07	5.51494e-05	up	Pectinesterase.
Os01g0743200	4.9351	4.55174e-08	1.13992e-05	up	Pectinesterase.
Os01g0743200	5.08797	6.07287e-08	1.38687e-05	up	Pectinesterase.
Os06g0104300	2.05254	2.48869e-08	7.43064e-06	up	Pectinesterase-like protein.
Os01g0545900	8.09677	8.08381e-09	3.20511e-06	up	Pentatricopeptide repeat domain containing protein.
Os06g0114366	2.73676	1.12904e-10	1.66912e-07	up	Pentatricopeptide repeat domain containing protein.
Os01g0651100	2.81876	9.5771e-06	0.00064783	up	Pentatricopeptide repeat domain containing protein.
Os03g0169300	2.20722	1.33299e-06	0.000132763	up	Pentatricopeptide repeat domain containing protein.
Os11g0460700	154.1	4.56646e-09	2.06074e-06	up	Pentatricopeptide repeat domain containing protein.
Os01g0936900	2.85239	5.30444e-09	2.30022e-06	up	Peptidase A1 domain containing protein.
Os02g0720600	2.25826	6.56284e-07	7.71474e-05	up	Peptidase A1 domain containing protein.
Os08g0267300	2.79816	2.57406e-07	3.87626e-05	up	Peptidase A1 domain containing protein.
Os01g0937000	8.29614	2.2102e-07	3.47599e-05	up	Peptidase asparticcatalytic domain containing protein.
Os04g0685200	2.98964	6.96481e-07	8.04546e-05	up	Peptidase asparticcatalytic domain containing protein.
Os01g0937600	175.9	3.92975e-09	1.84362e-06	up	Peptidase asparticcatalytic domain containing protein.
Os11g0544300	3.5561	1.20389e-07	2.248e-05	up	Peptidase C12ubiquitin carboxyl-terminal hydrolase 1 domain containing protein.
Os02g0164000	3.18487	2.8472e-06	0.000241967	up	Peptidase C48SUMO/Sentrin/Ubl1 domain containing protein.
Os09g0362500	2.26947	1.47093e-07	2.60584e-05	up	Peptidase M1membrane alanine aminopeptidase family protein.
Os01g0895500	2.54215	5.95631e-08	1.36703e-05	up	Peptidase S54rhomboid domain containing protein.
Os01g0702300	4.31461	2.96321e-07	4.29098e-05	up	Peptidase S8/S53subtilisin/kexin/sedolisin domain containing protein.
Os09g0441000	4.17558	1.07416e-07	2.07308e-05	up	Peptidase S8subtilisin-related domain containing protein.
Os03g0119300	2.55862	2.15645e-07	3.41478e-05	up	Peptidase S8subtilisin-related domain containing protein.
Os09g0441000	5.07174	2.20578e-07	3.47299e-05	up	Peptidase S8subtilisin-related domain containing protein.
Os12g0638300	2.4277	1.12816e-06	0.000116775	up	Peptide transporter.
Os01g0207200	5.0716	1.57498e-12	2.21275e-08	up	Peptide-N4-(N-acetyl-beta-glucosaminyl)asparagine amidase A (EC 3.5.1.52) (PNGase A) (Glycopeptide N-glycosidase) (N-glycanase) [Contains: Peptide-N4-(N-acetyl-beta-glucosaminyl)asparagine amidase A light chain (PNGase A small chain) (PNGase A subunit B)%3B Peptide-N4- (N-acetyl-beta-glucosaminyl)asparagine amidase A heavy chain (PNGase A large chain) (PNGase A subunit A)].
Os09g0548200	2.44083	3.59968e-08	9.71289e-06	up	Peptidoglycan-binding Lysin subgroup domain containing protein.
Os01g0844300	2.67607	1.90472e-06	0.000175813	up	Peptidylprolyl isomerase.
Os11g0112400	5.24225	1.64522e-08	5.40453e-06	up	Peroxidase (EC 1.11.1.7).
Os05g0162000	2.12013	6.22044e-07	7.39397e-05	up	Peroxidase (Fragment).
Os03g0368000	2.76236	9.47925e-07	0.000102111	up	Peroxidase 1.
Os06g0274800	3.52062	1.67358e-09	9.53393e-07	up	Peroxidase 11 precursor (EC 1.11.1.7) (Atperox P11) (ATP23a/ATP23b).
Os01g0962700	2.07927	6.71685e-07	7.8248e-05	up	Peroxidase 12 precursor (EC 1.11.1.7) (Atperox P12) (PRXR6) (ATP4a).
Os03g0563600	2.16981	4.67936e-06	0.000359911	up	Peroxidase 56 precursor (EC 1.11.1.7) (Atperox P56) (ATP33).
Os01g0327100	4.81074	8.83276e-06	0.000606381	up	Peroxidase 8.
Os12g0112000	9.49077	4.20114e-08	1.08226e-05	up	Peroxidase precursor (EC 1.11.1.7) (Fragment).
Os12g0112000	6.52891	1.19867e-08	4.30403e-06	up	Peroxidase precursor (EC 1.11.1.7) (Fragment).
Os01g0263000	5.35973	3.0443e-07	4.37409e-05	up	Peroxidase.
Os07g0677100	3.0393	1.80608e-06	0.00016832	up	Peroxidase.
Os03g0762400	3.2507	8.36441e-09	3.27565e-06	up	Peroxidase2 precursor (EC 1.11.1.7).
Os04g0518100	2.14996	1.1923e-06	0.000121762	up	Phenylalanine ammonia-lyase.
Os10g0444700	3.54543	1.50298e-09	8.72297e-07	up	Phosphate transporter 6.
Os06g0607100	5.03568	1.30397e-07	2.38442e-05	up	phosphatidic acid phosphatase-related / PAP2-related.
Os06g0283400	3.46565	1.37702e-06	0.000136232	up	Phosphatidylinositol 3- and 4-kinasecatalytic domain containing protein.
Os03g0850700	3.41773	2.82863e-08	8.14651e-06	up	Phosphatidylinositol phosphatidylcholine transfer protein sec14 cytosolic-like protein.
Os08g0497300	2.24078	6.70532e-11	1.26458e-07	up	phosphatidylinositol transporter/ transporter.
Os01g0118300	2.34983	1.19726e-07	2.23908e-05	up	Phosphatidylserine synthaseRegulation of stem developmentControl of cell elongation in uppermost internode
Os01g0118300	2.16307	8.39526e-06	0.000582712	up	Phosphatidylserine synthaseRegulation of stem developmentControl of cell elongation in uppermost internode
Os03g0255500	2.11195	7.11571e-07	8.17012e-05	up	Phosphoenolpyruvate carboxykinase.
Os01g0102000	4.15018	3.59354e-08	9.71289e-06	up	Phosphoesterase family protein.
Os06g0668200	2.11206	1.22102e-09	7.42502e-07	up	Phosphoglycerate kinasecytosolic (EC 2.7.2.3).
Os12g0135100	3.47065	2.32713e-07	3.6079e-05	up	Phosphoglycerate mutase family protein.
Os03g0261100	3.05104	5.65693e-07	6.90179e-05	up	Phospholipase A2 family protein.
Os05g0415200	4.80208	1.51717e-07	2.66227e-05	up	Phytochelatin synthaseHeavy metal (cadmium) resistance
Os11g0557000	2.94904	2.55746e-06	0.000221382	up	Phytosulfokine family protein.
Os12g0147800	2.14804	1.3544e-07	2.45714e-05	up	Phytosulfokines 5 precursor (Secretory protein SH27A).
Os08g0108300	2.56969	1.04457e-09	6.58372e-07	up	Pistil-specific extensin-like protein family protein.
Os05g0355300	2.43249	1.19736e-06	0.000122158	up	PIT1.
Os11g0180000	2.76739	7.88094e-07	8.82638e-05	up	Plant disease resistance response protein family protein.
Os03g0280750	3.2544	4.80861e-09	2.13745e-06	up	Plant disease resistance response protein family protein.
Os07g0174900	3.50064	4.6288e-06	0.000357144	up	Plant lipid transfer protein and hydrophobic proteinhelical domain containing protein.
Os03g0793800	3.73336	8.40705e-07	9.29264e-05	up	Plant lipid transfer protein and hydrophobic proteinhelical domain containing protein.
Os03g0793800	9.01569	7.00958e-10	4.86126e-07	up	Plant lipid transfer protein and hydrophobic proteinhelical domain containing protein.
Os10g0554800	3.17706	5.27991e-06	0.000397116	up	Plant lipid transfer protein and hydrophobic proteinhelical domain containing protein.
Os01g0914100	4.31084	3.24828e-09	1.58487e-06	up	Plant lipid transfer protein/seed storage/trypsin-alpha amylase inhibitor domain containing protein.
Os07g0531400	5.9119	2.57308e-08	7.61512e-06	up	Plant peroxidase domain containing protein.
Os07g0531400	17.381	8.62304e-09	3.34535e-06	up	Plant peroxidase domain containing protein.
Os08g0241800	82.2	3.59726e-06	0.00029138	up	Plasma membrane H+-ATPase (EC 3.6.1.3).
Os05g0380900	2.45177	4.93133e-06	0.000375806	up	Polcalcin Jun o 2 (Calcium-binding pollen allergen Jun o 2).
Os01g0899700	3.37978	9.95284e-09	3.71528e-06	up	Pollen Ole e 1 allergen and extensin domain containing protein.
Os10g0205700	3.2513	8.55043e-06	0.000591109	up	Pollen Ole e 1 allergen/extensin domain containing protein.
Os06g0678800	3.92843	2.60407e-12	2.77563e-08	up	Pollen-specific protein NTP303 precursor.
Os06g0678800	2.28772	3.83259e-07	5.18079e-05	up	Pollen-specific protein NTP303 precursor.
Os01g0351200	2.27187	7.26209e-06	0.000516773	up	Poly.
Os11g0249600	5.86215	3.27307e-08	9.10408e-06	up	Polygalacturonase C (Fragment).
Os05g0542800	3.54935	7.43621e-08	1.59956e-05	up	polygalacturonase.
Os05g0542800	5.13285	3.17654e-10	2.75555e-07	up	polygalacturonase.
Os09g0487600	2.08336	8.92143e-07	9.73407e-05	up	polygalacturonase.
Os07g0568700	3.26349	5.03725e-06	0.000382262	up	Polygalacturonase-inhibiting proteinInhibitor of fungal polygalacturonaseRegulation of floral organ number
Os12g0554800	2.60307	6.43341e-07	7.59056e-05	up	Polygalacturonase-like protein.
Os01g0103900	2.79464	4.90724e-07	6.22559e-05	up	Polynucleotidyl transferaseRibonuclease H fold domain containing protein.
Os01g0871900	2.43317	2.71949e-06	0.000232928	up	POT family protein.
Os01g0935500	7.78947	5.0532e-06	0.000383193	up	Potassium transporter HAK4.
Os10g0509100	2.35945	7.12918e-08	1.55866e-05	up	predicted protein.
Os08g0484100	2.58128	5.92696e-06	0.000437942	up	predicted protein.
Os04g0579700	3.07379	4.36389e-10	3.3765e-07	up	Predicted protein.
Os10g0512800	2.10527	2.85481e-07	4.18212e-05	up	predicted protein.
Os05g0436100	3.36408	3.90315e-06	0.000311353	up	predicted protein.
Os02g0702600	2.58991	4.53474e-09	2.04869e-06	up	predicted protein.
Os05g0128600	8.75342	1.16061e-07	2.1897e-05	up	predicted protein.
Os06g0727800	2.91088	9.91354e-07	0.00010542	up	predicted protein.
Os10g0509100	2.05101	4.18801e-06	0.000330265	up	predicted protein.
Os09g0299500	2.079	4.07881e-06	0.00032319	up	predicted protein.
Os08g0114150	70.1	6.48349e-06	0.000471646	up	predicted protein.
Os01g0577600	2.02577	4.45577e-07	5.77833e-05	up	predicted protein.
Os05g0436100	3.67119	1.4294e-08	4.89922e-06	up	predicted protein.
Os03g0826300	3.77904	7.93023e-08	1.6723e-05	up	predicted protein.
Os05g0554000	2.5126	1.33286e-06	0.000132763	up	predicted protein.
Os07g0165100	3.36692	5.43374e-07	6.69488e-05	up	predicted protein.
Os02g0528100	2.08042	6.58588e-06	0.000477463	up	predicted protein.
Os11g0637700	2.33124	1.40915e-06	0.000138847	up	predicted protein.
Os05g0562800	3.35282	1.92007e-07	3.13503e-05	up	predicted protein.
Os01g0220500	5.50068	1.37865e-07	2.48698e-05	up	predicted protein.
Os01g0168600	3.3936	7.06295e-08	1.55229e-05	up	predicted protein.
Os06g0705000	2.8818	1.58257e-06	0.000151717	up	predicted protein.
Os01g0868900	115.3	2.22565e-08	6.81706e-06	up	predicted protein.
Os05g0241000	2.0303	8.94142e-06	0.000612118	up	Prefoldin domain containing protein.
Os05g0226900	4.08275	9.62355e-06	0.000650547	up	Proline-rich glycoproteinABA-dependent inhibition of root growth
Os10g0497800	2.05128	6.94185e-07	8.02605e-05	up	Prolyl 4-hydroxylasealpha subunit-like protein.
Os08g0529100	2.20696	3.34265e-07	4.67231e-05	up	Proteasome subunit beta type 1 (EC 3.4.25.1) (20S proteasome alpha subunit F) (20S proteasome subunit beta-6).
Os11g0199200	2.17795	5.48123e-06	0.000410397	up	Protein disulfide isomerase.
Os02g0554900	4.76221	1.29617e-07	2.37434e-05	up	Protein disulfide isomerase-like 1-3.
Os02g0554900	5.60897	2.4504e-07	3.73617e-05	up	Protein disulfide isomerase-like 1-3.
Os02g0554900	13.088	1.15467e-08	4.18592e-06	up	Protein disulfide isomerase-like 1-3.
Os02g0554900	5.04642	8.23754e-11	1.41755e-07	up	Protein disulfide isomerase-like 1-3.
Os03g0719850	7.14953	2.81098e-06	0.000239282	up	Protein kinase 2.
Os02g0670100	11.6074	1.68899e-08	5.47238e-06	up	protein kinase APK1B.
Os12g0180500	91.1	7.91593e-07	8.85599e-05	up	Protein kinase domain containing protein.
Os12g0180500	6.22034	7.75386e-07	8.71464e-05	up	Protein kinase domain containing protein.
Os12g0577700	2.16174	8.24162e-06	0.000574259	up	Protein kinase domain containing proteinexpressed.
Os10g0200000	2.50095	6.44073e-08	1.44776e-05	up	Protein kinase domain containing proteinexpressed.
Os05g0525000	47.7065	1.66084e-08	5.42455e-06	up	Protein kinasecatalytic domain domain containing protein.
Os12g0567500	4.10455	4.64945e-07	5.97902e-05	up	Protein kinasecatalytic domain domain containing protein.
Os05g0525800	87	2.54e-06	0.000220099	up	Protein kinasecatalytic domain domain containing protein.
Os05g0525600	7.70588	1.61567e-08	5.32637e-06	up	Protein kinasecatalytic domain domain containing protein.
Os12g0567500	4.58667	2.82671e-07	4.14974e-05	up	Protein kinasecatalytic domain domain containing protein.
Os05g0524500	4.11825	5.50722e-07	6.76532e-05	up	Protein kinasecore domain containing protein.
Os01g0247500	6.54875	5.75295e-08	1.3357e-05	up	Protein kinasecore domain containing protein.
Os02g0769700	3.52899	2.34213e-06	0.000205965	up	Protein kinasecore domain containing protein.
Os02g0136900	6.24568	3.30936e-08	9.17424e-06	up	Protein kinasecore domain containing protein.
Os02g0136900	6.14152	1.03519e-08	3.83318e-06	up	Protein kinasecore domain containing protein.
Os07g0147600	6.31698	2.07547e-06	0.000187935	up	Protein kinasecore domain containing protein.
Os07g0517300	2.4214	6.61218e-07	7.74639e-05	up	Protein of unknown function DUF1032 family protein.
Os02g0264800	2.243	1.56678e-08	5.2228e-06	up	Protein of unknown function DUF1070 family protein.
Os07g0607500	5.77918	2.45419e-08	7.34881e-06	up	Protein of unknown function DUF1195 family protein.
Os10g0150600	6	3.52874e-06	0.000287402	up	Protein of unknown function DUF1210 family protein.
Os05g0433400	84.1	3.39696e-06	0.0002791	up	Protein of unknown function DUF1218 domain containing protein.
Os08g0412700	3.12217	1.74672e-07	2.92808e-05	up	Protein of unknown function DUF1262 family protein.
Os07g0484500	3.31389	1.07832e-09	6.73497e-07	up	Protein of unknown function DUF1395 family protein.
Os05g0115100	2.10354	3.26062e-07	4.58857e-05	up	Protein of unknown function DUF1635 family protein.
Os05g0115100	2.62548	8.96264e-08	1.82339e-05	up	Protein of unknown function DUF1635 family protein.
Os01g0148500	16.3969	3.22829e-08	9.02109e-06	up	Protein of unknown function DUF1677Oryza sativa family protein.
Os07g0120900	74.9	2.86262e-06	0.000242929	up	Protein of unknown function DUF1719Oryza sativa family protein.
Os07g0122200	6.64977	6.04846e-12	3.93313e-08	up	Protein of unknown function DUF1719Oryza sativa family protein.
Os02g0712500	2.34089	9.66135e-08	1.92726e-05	up	Protein of unknown function DUF23 family protein.
Os06g0273500	2.1074	2.96024e-06	0.000249174	up	Protein of unknown function DUF231plant domain containing protein.
Os01g0652100	2.4062	8.28842e-10	5.51229e-07	up	Protein of unknown function DUF231plant domain containing protein.
Os07g0256700	2.02677	2.38415e-08	7.18054e-06	up	Protein of unknown function DUF231plant domain containing protein.
Os05g0356700	4.43068	7.32977e-07	8.35576e-05	up	Protein of unknown function DUF231plant domain containing protein.
Os08g0566100	2.40514	3.22441e-06	0.000267134	up	Protein of unknown function DUF239plant domain containing protein.
Os02g0726500	2.19454	3.4731e-08	9.48863e-06	up	Protein of unknown function DUF246plant domain containing protein.
Os08g0395800	3.14111	6.75809e-06	0.000487009	up	Protein of unknown function DUF247plant family protein.
Os09g0300800	2.75915	9.64485e-07	0.000103411	up	Protein of unknown function DUF247plant family protein.
Os06g0128100	2.02188	1.79222e-08	5.73513e-06	up	Protein of unknown function DUF248methyltransferase putative domain containing protein.
Os11g0139400	2.17317	1.49665e-07	2.63901e-05	up	Protein of unknown function DUF250 domain containing protein.
Os06g0506200	2.50989	1.11188e-06	0.000115541	up	Protein of unknown function DUF250 domain containing protein.
Os05g0170000	2.01777	1.04188e-08	3.85107e-06	up	Protein of unknown function DUF266plant family protein.
Os10g0165000	6.36224	1.35167e-10	1.80247e-07	up	Protein of unknown function DUF266plant family protein.
Os03g0120100	4.12562	1.20123e-06	0.000122462	up	Protein of unknown function DUF284transmembrane eukaryotic family protein.
Os01g0176800	5.64681	4.94809e-08	1.21139e-05	up	Protein of unknown function DUF2921 domain containing protein.
Os09g0547200	4.06292	4.69414e-08	1.16617e-05	up	Protein of unknown function DUF292eukaryotic domain containing protein.
Os09g0516800	2.01526	3.39842e-10	2.83582e-07	up	Protein of unknown function DUF3128 domain containing protein.
Os02g0816400	2.34821	1.48082e-11	5.67294e-08	up	Protein of unknown function DUF3741 domain containing protein.
Os09g0501100	5.70446	3.06534e-10	2.70483e-07	up	Protein of unknown function DUF568 domain containing protein.
Os09g0501100	28.9969	4.82744e-08	1.18746e-05	up	Protein of unknown function DUF568 domain containing protein.
Os08g0335600	2.12947	7.9143e-06	0.000555089	up	Protein of unknown function DUF568DOMON-like domain containing protein.
Os01g0249900	19.3529	4.55851e-06	0.000352972	up	Protein of unknown function DUF573 family protein.
Os11g0490100	3.89779	1.02869e-07	2.01142e-05	up	Protein of unknown function DUF579plant family protein.
Os11g0242600	2.65127	1.41316e-07	2.52943e-05	up	Protein of unknown function DUF579plant family protein.
Os01g0180400	2.13218	5.05264e-08	1.22835e-05	up	Protein of unknown function DUF581 domain containing protein.
Os02g0687200	4.63937	4.39178e-07	5.71188e-05	up	Protein of unknown function DUF581 family protein.
Os02g0686800	4.34477	9.32745e-10	6.01603e-07	up	Protein of unknown function DUF581 family protein.
Os06g0223700	2.421	8.13659e-07	9.06375e-05	up	Protein of unknown function DUF581 family protein.
Os11g0659200	8.69948	1.92125e-08	6.08697e-06	up	Protein of unknown function DUF581 family protein.
Os05g0531000	4.33524	5.7426e-07	6.9739e-05	up	Protein of unknown function DUF584 family protein.
Os04g0154700	6.39612	8.24204e-09	3.23997e-06	up	Protein of unknown function DUF594 domain containing protein.
Os11g0640500	5.89404	5.4708e-07	6.73054e-05	up	Protein of unknown function DUF594 domain containing protein.
Os07g0109100	75.5	6.94943e-06	0.000498114	up	Protein of unknown function DUF594 family protein.
Os07g0109100	13.5435	4.85832e-07	6.17676e-05	up	Protein of unknown function DUF594 family protein.
Os08g0153900	7.5661	1.99653e-09	1.08948e-06	up	Protein of unknown function DUF599 family protein.
Os03g0233000	2.55784	3.79841e-07	5.13961e-05	up	Protein of unknown function DUF607 family protein.
Os10g0411100	13.3101	3.65324e-08	9.83183e-06	up	Protein of unknown function DUF620 domain containing protein.
Os05g0252100	7.67894	2.23904e-07	3.4988e-05	up	Protein of unknown function DUF620 family protein.
Os05g0252100	4.45965	4.5903e-07	5.91212e-05	up	Protein of unknown function DUF620 family protein.
Os12g0158300	3.32103	1.76367e-12	2.28573e-08	up	Protein of unknown function DUF623plant domain containing protein.
Os11g0156401	2.52315	5.19271e-08	1.24686e-05	up	Protein of unknown function DUF623plant domain containing protein.
Os03g0370400	2.78062	1.27931e-06	0.000128526	up	Protein of unknown function DUF679 family protein.
Os07g0645300	5.83333	3.88508e-07	5.23127e-05	up	Protein of unknown function DUF679 family protein.
Os08g0106501	2.37576	9.12744e-06	0.000622899	up	Protein of unknown function DUF679 family protein.
Os02g0114100	3.91932	4.50155e-08	1.12872e-05	up	Protein of unknown function DUF6transmembrane domain containing protein.
Os06g0727700	4.42865	8.64224e-08	1.77784e-05	up	Protein of unknown function DUF707 family protein.
Os05g0430700	3.8397	3.11704e-07	4.43619e-05	up	Protein of unknown function DUF803 family protein.
Os05g0430700	3.08202	1.43661e-11	5.65585e-08	up	Protein of unknown function DUF803 family protein.
Os08g0101800	2.32308	2.44024e-07	3.72615e-05	up	Protein of unknown function DUF821CAP10-like family protein.
Os08g0101800	2.71799	2.88345e-08	8.27566e-06	up	Protein of unknown function DUF821CAP10-like family protein.
Os04g0116900	3.01122	4.2932e-07	5.61669e-05	up	Protein of unknown function DUF827plant family protein.
Os04g0116200	11.1685	3.92412e-08	1.03067e-05	up	Protein of unknown function DUF827plant family protein.
Os04g0498000	2.05536	4.2902e-10	3.34157e-07	up	Protein of unknown function DUF828plant family protein.
Os03g0806700	24.8293	4.22624e-06	0.000332458	up	Protein of unknown function DUF868plant family protein.
Os11g0417400	2.17783	8.5572e-06	0.000591478	up	Protein phosphatase 2C domain containing protein.
Os11g0417400	4.24355	1.44742e-08	4.95369e-06	up	Protein phosphatase 2C domain containing protein.
Os01g0656200	3.20875	3.18163e-06	0.000264746	up	Protein phosphatase 2C family protein.
Os01g0656200	2.1476	4.55801e-08	1.1408e-05	up	Protein phosphatase 2C family protein.
Os01g0656200	3.37035	2.41366e-07	3.70466e-05	up	Protein phosphatase 2C family protein.
Os01g0583100	2.99011	3.30981e-07	4.63577e-05	up	Protein phosphatase 2C.
Os09g0325700	4.79273	9.15011e-07	9.91575e-05	up	Protein phosphatase 2CAbiotic stress responseEarly panicle development
Os04g0167875	37.7746	1.68185e-08	5.46632e-06	up	Protein phosphatase 2C-like domain containing protein.
Os04g0167900	27.2684	2.72368e-08	7.91017e-06	up	Protein phosphatase 2C-like domain containing protein.
Os03g0207400	2.28139	8.93702e-08	1.82043e-05	up	Protein phosphatase 2C-like.
Os03g0268600	9.82303	7.34582e-13	2.05018e-08	up	Protein phosphatase type 2C.
Os01g0124100	2.2316	1.78704e-06	0.000167007	up	Proteinase inhibitor I12Bowman-Birk family protein.
Os12g0455000	3.86813	6.05322e-07	7.24775e-05	up	Proteinase inhibitor I1Kazal domain containing protein.
Os01g0323100	2.92973	4.72937e-10	3.58034e-07	up	Pto kinase interactor 1.
Os04g0605500	2.54702	1.03324e-07	2.01711e-05	up	P-type ATPase (Fragment).
Os04g0605500	3.49317	1.72333e-06	0.000162248	up	P-type ATPase (Fragment).
Os04g0605500	2.55938	1.12087e-08	4.08276e-06	up	P-type ATPase (Fragment).
Os02g0695200	2.00957	3.62093e-06	0.000293126	up	P-type R2R3 Myb protein (Fragment).
Os04g0410600	3.83131	1.75805e-09	9.89284e-07	up	Purple acid phosphatase.
Os01g0800500	9.48872	1.75282e-06	0.000164651	up	Purple acid phosphataseN-terminal domain containing protein.
Os06g0718300	3.30263	2.63629e-12	2.77563e-08	up	Putative UPF0496 protein 2.
Os02g0714200	2.00078	7.79311e-07	8.75165e-05	up	Pyrophosphate--fructose 6-phosphate 1-phosphotransferase alpha subunit (EC 2.7.1.90) (PFP) (6-phosphofructokinasepyrophosphate dependent) (Pyrophosphate-dependent 6-phosphofructose-1-kinase) (PPi-PFK).
Os06g0246500	9.45205	7.29805e-08	1.58215e-05	up	Pyruvate dehydrogenase E1 alpha subunit (EC 1.2.4.1).
Os06g0246500	6.93772	1.81656e-07	3.00993e-05	up	Pyruvate dehydrogenase E1 alpha subunit (EC 1.2.4.1).
Os03g0672300	2.35531	5.69063e-11	1.16994e-07	up	Pyruvate kinase.
Os09g0101800	2.14139	8.48954e-08	1.75252e-05	up	Quinoprotein amine dehydrogenasebeta chain-like domain containing protein.
Os01g0274800	2.693	2.50448e-07	3.80324e-05	up	R2R3-type MYB transcription factorSugar partitioning into anther
Os01g0274800	14.5952	1.20809e-06	0.000123041	up	R2R3-type MYB transcription factorSugar partitioning into anther
Os01g0932950	3.16647	8.51851e-06	0.000589393	up	RALFL33.
Os12g0541700	2.60355	1.56001e-07	2.69909e-05	up	Rapid alkalinization factor 2.
Os05g0528000	2.18392	1.0489e-10	1.59878e-07	up	RbohAOsp (Fragment).
Os10g0389300	2.7888	3.36037e-07	4.68886e-05	up	Red chlorophyll catabolite reductase
Os08g0109800	2.61614	2.35231e-06	0.000206685	up	Regulator of chromosome condensation/beta-lactamase-inhibitor protein II domain containing protein.
Os04g0439600	3.40375	2.10748e-06	0.000189963	up	Regulator of chromosome condensation/beta-lactamase-inhibitor protein II domain containing protein.
Os04g0439600	3.0439	8.53501e-06	0.000590239	up	Regulator of chromosome condensation/beta-lactamase-inhibitor protein II domain containing protein.
Os04g0620200	4.96782	2.43091e-06	0.000212109	up	Remorin proteinGrain setting
Os02g0824500	4.45082	3.21631e-10	2.76165e-07	up	Remorin.
Os02g0767000	2.19437	4.5044e-06	0.000349381	up	RemorinC-terminal domain containing protein.
Os08g0280600	2.05928	2.69084e-07	4.00413e-05	up	Reticulon domain containing protein.
Os08g0238200	2.85333	6.25382e-06	0.000458234	up	Retrotransposon protein Ty1-copia subclass.
Os08g0238200	5.15452	2.39881e-06	0.000209971	up	Retrotransposon protein Ty1-copia subclass.
Os10g0565500	2.927	3.06966e-06	0.00025708	up	Retrotransposon protein.
Os01g0913600	3.43672	2.28129e-06	0.000201298	up	Rho GDP-dissociation inhibitor 1 (Rho GDI-1) (AtRhoGDI1).
Os01g0913600	3.0983	6.52734e-06	0.000474502	up	Rho GDP-dissociation inhibitor 1 (Rho GDI-1) (AtRhoGDI1).
Os03g0256800	3.84116	7.54684e-07	8.52892e-05	up	RhoGAP domain containing proteinexpressed.
Os04g0306400	2.59445	4.24625e-06	0.000333589	up	Ribose 5-phosphate isomerase family protein.
Os06g0177250	4.51765	3.91125e-08	1.02924e-05	up	Ribosomal protein S15 containing protein.
Os06g0176150	4.29253	1.07725e-07	2.07603e-05	up	Ribosomal protein S15 containing protein.
Os03g0816200	7.16471	7.09016e-08	1.55333e-05	up	Ribosomal protein S26e domain containing protein.
Os07g0684000	8.08567	2.84363e-09	1.42775e-06	up	Ricin B-related lectin domain containing protein.
Os03g0348900	2.75085	1.02671e-09	6.50079e-07	up	Ring finger E3 ubiquitin ligaseAbiotic stress tolerance
Os02g0686100	100.6	3.66994e-07	5.01155e-05	up	RING-H2 finger protein ATL1B.
Os02g0686100	6.61497	4.71851e-06	0.000362586	up	RING-H2 finger protein ATL1B.
Os03g0796000	42.605	5.05589e-08	1.22835e-05	up	Ripening-associated protein (Fragment).
Os03g0796000	2.3364	1.06168e-07	2.05749e-05	up	Ripening-associated protein (Fragment).
Os10g0569400	3.28253	3.47364e-07	4.81162e-05	up	RIR1a protein precursor.
Os10g0569800	4.62564	7.50287e-07	8.50402e-05	up	RIR1b protein.
Os07g0602600	3.01215	3.68049e-08	9.87951e-06	up	RNA binding protein.
Os07g0180800	2.37952	2.63266e-07	3.94019e-05	up	RNA recognition motif domain domain containing protein.
Os05g0552600	4.58767	4.1656e-08	1.0757e-05	up	root cap periphery gene2.
Os01g0111500	3.48012	3.59809e-08	9.71289e-06	up	ROOT HAIR DEFECTIVE-SIX LIKE (RSL) class I basic helix-loop-helix proteinbHLH transcription factorRegulation of root hair development
Os10g0551800	2.46841	7.32605e-07	8.35381e-05	up	Root-specific protein (RCc2 protein).
Os01g0783500	2.11917	2.43781e-08	7.31561e-06	up	Rossmann-like alpha/beta/alpha sandwich fold domain containing protein.
Os02g0611200	2.5003	2.88447e-06	0.000244231	up	S-adenosylmethionine decarboxylase 2.
Os06g0226050	23.6275	2.2982e-07	3.56973e-05	up	Salt-stress induced protein (Salt protein).
Os06g0315000	5.08113	7.8587e-12	4.2884e-08	up	SAM dependent carboxyl methyltransferase domain containing protein.
Os12g0167700	2.50043	4.50815e-11	1.06836e-07	up	SAP domain containing proteinexpressed.
Os06g0726100	7.97476	4.27775e-06	0.000335555	up	Seed chitinase-c.
Os07g0209100	4.34158	4.37737e-07	5.70162e-05	up	Seed imbibition protein (Fragment).
Os06g0341300	94.7	8.87293e-07	9.69136e-05	up	Seed maturation protein domain containing protein.
Os06g0341300	22.7388	3.36699e-08	9.28105e-06	up	Seed maturation protein domain containing protein.
Os03g0347500	46.2157	9.41951e-09	3.55458e-06	up	Senescence-associated protein (SAG29).
Os06g0653100	2.1357	1.51708e-06	0.000146865	up	Senescence-associated protein 5.
Os02g0114200	3.48318	1.6674e-09	9.5118e-07	up	Serine carboxypeptidase 3.
Os12g0581400	4.43455	5.80159e-07	7.03318e-05	up	Serine carboxypeptidase family protein.
Os04g0525700	2.75024	1.04999e-07	2.04149e-05	up	Serine carboxypeptidase II precursor (EC 3.4.16.6) (Carboxypeptidase D) (Bri1 suppressor 1) [Contains: Serine carboxypeptidase II chain A%3B Serine carboxypeptidase II chain B].
Os01g0332500	2.92822	1.16473e-06	0.000119595	up	Serine carboxypeptidase II-like protein.
Os11g0431700	2.06829	2.59412e-07	3.89234e-05	up	Serine carboxypeptidase.
Os08g0117700	3.25381	2.90413e-07	4.23641e-05	up	Serine/threonine protein kinase domain containing protein.
Os05g0480400	2.28627	2.71554e-10	2.49279e-07	up	Serine/threonine protein kinase domain containing protein.
Os05g0480400	4.34031	4.7592e-10	3.58863e-07	up	Serine/threonine protein kinase domain containing protein.
Os11g0133500	2.22997	3.24899e-07	4.57999e-05	up	Serine/threonine protein kinase-related domain containing protein.
Os10g0561500	3.89857	7.98247e-08	1.67822e-05	up	Serine/threonine protein kinase-related domain containing protein.
Os01g0224000	3.21124	9.43713e-06	0.000640136	up	Serine/threonine protein kinase-related domain containing protein.
Os03g0127700	2.13777	8.85745e-07	9.67902e-05	up	Serine/threonine protein kinase-related domain containing protein.
Os01g0195200	2.17208	3.1008e-07	4.42372e-05	up	Serine/threonine-protein kinase PBS1 (EC 2.7.1.37) (AvrPphB susceptible protein 1).
Os01g0195200	2.25422	1.88784e-07	3.09475e-05	up	Serine/threonine-protein kinase PBS1 (EC 2.7.1.37) (AvrPphB susceptible protein 1).
Os01g0811300	2.28226	6.04876e-07	7.24775e-05	up	SET domain protein SDG111.
Os06g0129100	3.1875	2.66574e-07	3.97534e-05	up	Short-chain dehydrogenase/reductase SDR family protein.
Os03g0748100	9.91176	4.20917e-06	0.00033149	up	Short-chain type dehydrogenase/reductase (EC 1.-.-.-).
Os05g0257100	4.40247	2.05303e-06	0.000186453	up	SHR5-receptor-like kinase (Fragment).
Os10g0419400	4.19815	2.38357e-06	0.000208991	up	SIPL.
Os02g0831400	2.79849	9.41765e-08	1.89598e-05	up	SKIP interacting protein 16.
Os02g0489800	2.48504	4.29458e-10	3.34157e-07	up	SKIP interacting protein 18 (Fragment).
Os06g0496800	2.05097	8.27592e-12	4.45742e-08	up	S-locus receptor kinase precursor.
Os04g0531100	2.59412	1.99398e-06	0.000182179	up	Small C2-domain protein consisting of a single C2 domainPhloem proteinSignaling pathway involving Ca<sup>2+</sup> ionsDefense response
Os01g0229400	3.84806	2.01845e-07	3.23829e-05	up	Small GTP-binding proteinGTPaseRegulation of cell deathDisease resistanceImmune responses
Os01g0229400	6.8855	1.05704e-06	0.000111151	up	Small GTP-binding proteinGTPaseRegulation of cell deathDisease resistanceImmune responses
Os03g0197200	12.5338	3.61889e-08	9.75202e-06	up	Sorbitol transporter.
Os11g0637200	39.0732	8.092e-09	3.20529e-06	up	Sorbitol transporter.
Os09g0417800	6.24912	7.64167e-08	1.62857e-05	up	Splicing variant of OsWRKY62Pathogen defense
Os04g0573000	3.49788	1.32816e-12	2.20327e-08	up	SPX-MFS proteinPhosphate transporterPi homeostasis
Os02g0678200	3.10022	7.34282e-08	1.58524e-05	up	SPX-MFS proteinPi homeostasis
Os02g0678200	2.06899	1.24839e-06	0.000126246	up	SPX-MFS proteinPi homeostasis
Os06g0160700	3.97575	6.8024e-12	3.96534e-08	up	Starch synthaseStarch biosynthesis
Os08g0191433	3.66368	1.19163e-07	2.23114e-05	up	Starch synthaseStarch biosynthesis
Os02g0791700	2.16555	6.15781e-07	7.3448e-05	up	STE20/SPS1-related proline-alanine-rich protein kinase.
Os07g0101500	2.02825	3.16311e-08	8.90644e-06	up	Sterol 4-alpha-methyl-oxidase (Fragment).
Os01g0248000	5.78257	1.46836e-07	2.6024e-05	up	Stigma-specific protein Stig1 family protein.
Os05g0104900	2.75543	1.5869e-07	2.73876e-05	up	STIP1 homology and U box-containing protein 1.
Os01g0772400	2.23815	4.1466e-06	0.000327622	up	Streptomyces cyclase/dehydrase family protein.
Os05g0435800	2.89103	2.11651e-07	3.36567e-05	up	Subtilisin-like protease.
Os03g0401300	2.26073	8.85949e-06	0.000607814	up	Sucrose synthase metabolism (Fragment).
Os03g0170900	3.30686	2.95726e-06	0.000249024	up	Sucrose transporter.
Os03g0170900	2.57953	2.28626e-07	3.55589e-05	up	Sucrose transporter.
Os03g0170900	3.884	4.12553e-07	5.46405e-05	up	Sucrose transporter.
Os12g0476200	9.58779	1.42241e-09	8.36744e-07	up	Sucrose transporterTAL effector PthXo2-dependent disease susceptibility to bacterial pathogen
Os03g0197100	8.92877	1.71704e-07	2.89235e-05	up	Sugar transporter protein.
Os12g0137700	3.80633	4.84144e-06	0.000370112	up	Sulfotransferase family protein.
Os12g0137700	2.49804	7.20894e-08	1.56858e-05	up	Sulfotransferase family protein.
Os01g0311600	2.96409	2.05035e-06	0.000186393	up	Sulfotransferase family protein.
Os03g0161200	3.28125	1.65223e-06	0.000157052	up	Sulphate transporter.
Os03g0161200	5.56308	2.10558e-11	6.76925e-08	up	Sulphate transporter.
Os07g0599700	3.46496	3.17838e-09	1.55809e-06	up	Surface protein PspC.
Os04g0178300	2.30281	1.48664e-06	0.000144491	up	Syn-copalyl diphosphate synthase.
Os11g0168100	4.18733	1.78316e-06	0.000166858	up	Syntaxin 61 (AtSYP61) (Osmotic stess-sensitive mutant 1).
Os03g0637600	2.33391	2.61763e-06	0.000225554	up	systemin receptor SR160.
Os05g0444200	3.63055	1.07297e-07	2.0726e-05	up	T6J4.5 protein (WIP6 protein).
Os05g0444200	86.2	2.27061e-06	0.000200658	up	T6J4.5 protein (WIP6 protein).
Os09g0560850	5.44323	3.02757e-07	4.35822e-05	up	T8K14.10.
Os08g0524800	5.75153	4.60439e-07	5.92843e-05	up	TA1 protein (Fragment).
Os02g0459300	2.27693	1.80742e-08	5.77488e-06	up	tangled1.
Os03g0212600	2.45809	7.22726e-07	8.25933e-05	up	Targeting for Xklp2 family protein.
Os11g0592600	13.0141	8.77305e-06	0.000603381	up	Targeting for Xklp2 family protein.
Os12g0605500	2.78164	3.14133e-09	1.54725e-06	up	Tesmin/TSO1-likeCXC domain containing protein.
Os12g0605500	2.37551	5.90149e-09	2.5051e-06	up	Tesmin/TSO1-likeCXC domain containing protein.
Os02g0219800	3.40663	3.3316e-07	4.65898e-05	up	Tetraspanin domain containing protein.
Os04g0510600	2.97503	1.18398e-07	2.21882e-05	up	Tetratricopeptide-like helical domain containing protein.
Os01g0855200	2.29893	3.07235e-06	0.000257253	up	Tetratricopeptide-like helical domain containing protein.
Os03g0820300	2.71575	1.49175e-06	0.00014492	up	TFIIIA-type zinc finger proteinTranscription activatorAbiotic stress tolerance
Os09g0536300	27.9908	1.47257e-08	5.01538e-06	up	thaumatin-like protein 1.
Os06g0691200	3.45621	2.01112e-06	0.000183511	up	Thaumatin-like protein precursor.
Os03g0244200	2.19295	3.78131e-07	5.12818e-05	up	Thaumatin-like protein.
Os03g0663400	3.50127	1.19898e-06	0.000122293	up	Thaumatin-like protein.
Os06g0163400	2.46203	7.32916e-08	1.58311e-05	up	Thioredoxin domain 2 containing protein.
Os01g0794400	3.94326	3.97133e-08	1.03846e-05	up	Thioredoxin domain 2 containing protein.
Os07g0684100	2.11104	2.26834e-07	3.53393e-05	up	Thioredoxin-like 1.
Os04g0506300	23.5476	1.33484e-09	7.96532e-07	up	TMS membrane protein/tumour differentially expressed protein family protein.
Os10g0492500	4.42218	4.55092e-08	1.13992e-05	up	Tonoplast membrane integral protein ZmTIP3-1.
Os02g0828200	3.28541	5.30762e-07	6.58242e-05	up	TPR-like domain containing protein.
Os01g0801901	72.2	9.72896e-06	0.000656282	up	Transcription factor (Fragment).
Os05g0378500	5.60208	1.54141e-07	2.67701e-05	up	Transcription factor GRAS domain containing protein.
Os02g0702100	4.29567	4.08949e-12	3.26155e-08	up	transcription factor GT-3b.
Os09g0489200	2.21529	1.03227e-09	6.51608e-07	up	transcription factor jumonji (jmjC) domain-containing protein.
Os01g0187900	2.81481	2.78105e-06	0.000237318	up	Transcription factor MYBS2.
Os06g0347700	8.24101	2.44121e-12	2.77563e-08	up	Transcription factorMADS-box domain containing protein.
Os06g0347700	10.2247	1.83603e-08	5.85275e-06	up	Transcription factorMADS-box domain containing protein.
Os12g0206800	20.2254	5.68341e-08	1.32664e-05	up	Transcription factorMADS-box domain containing protein.
Os06g0347700	11.4074	8.63369e-10	5.68348e-07	up	Transcription factorMADS-box domain containing protein.
Os02g0139000	3.69018	6.87683e-08	1.51863e-05	up	Transcription factorRegulation of Pi signaling and homeostasisTolerance to low-Pi stress
Os02g0483500	2.83036	1.00757e-06	0.00010687	up	Transferase family protein.
Os06g0145200	2.02676	1.77571e-09	9.95173e-07	up	Transferase family protein.
Os04g0609500	5.79225	1.04905e-12	2.12997e-08	up	Transferase family protein.
Os04g0609500	26.4043	1.30567e-09	7.83635e-07	up	Transferase family protein.
Os04g0629600	2.04183	5.12456e-06	0.00038781	up	Transposase of Tn10 [Oryza sativa (japonica cultivar-group)].
Os10g0521000	2.64887	9.86278e-12	4.70152e-08	up	TRE1 protein (Fragment).
Os03g0386500	2.69783	1.93217e-06	0.000177912	up	Trehalose-6-phosphate phosphatase.
Os08g0445700	2.32088	1.4517e-07	2.58208e-05	up	Trehalose-6-phosphate synthase.
Os07g0586800	2.42143	2.79482e-06	0.00023815	up	triacylglycerol lipase.
Os01g0172100	3.02176	1.31822e-06	0.000131702	up	Triose phosphate/phosphate translocatornon-green plastidchloroplast precursor (CTPT).
Os01g0931600	4.4832	3.27147e-10	2.78616e-07	up	TubbyC-terminal domain containing protein.
Os11g0163600	2.19543	5.03915e-11	1.12907e-07	up	Tubby-like F-box protein 13.
Os01g0644000	2.12852	8.50626e-07	9.38479e-05	up	Twin-arginine translocation pathway signal domain containing protein.
Os09g0500300	2.7777	4.50539e-06	0.000349381	up	Type II inositol-145-trisphosphate 5-phosphatase 12 (EC 3.1.3.36) (At5PTase12) (FRAGILE FIBER3 protein).
Os09g0500300	5.0468	8.4323e-09	3.29291e-06	up	Type II inositol-145-trisphosphate 5-phosphatase 12 (EC 3.1.3.36) (At5PTase12) (FRAGILE FIBER3 protein).
Os02g0732600	260	4.07666e-09	1.89964e-06	up	Typical P-type R2R3 Myb protein (Fragment).
Os06g0258000	2.8507	3.51001e-07	4.84904e-05	up	Typical P-type R2R3 Myb protein (Fragment).
Os03g0118200	3.14161	5.31589e-07	6.58882e-05	up	UAA transporter family protein.
Os09g0378700	4.28227	4.44143e-08	1.11906e-05	up	ubiquitin-protein ligase.
Os08g0415600	6.13674	8.24043e-08	1.71475e-05	up	ubiquitin-protein ligase.
Os03g0101200	5.74928	1.33342e-06	0.000132773	up	U-box domain containing proteinexpressed.
Os07g0604800	2.16467	9.66608e-08	1.92728e-05	up	UDP-arabinopyranose mutasePollen wall morphogenesis
Os07g0201800	3.83137	8.5319e-07	9.40807e-05	up	UDP-glucuronosyl/UDP-glucosyltransferase domain containing protein.
Os02g0755900	3.69012	2.78681e-09	1.40634e-06	up	UDP-glucuronosyl/UDP-glucosyltransferase domain containing protein.
Os07g0202000	18.7872	3.68321e-06	0.000297297	up	UDP-glucuronosyl/UDP-glucosyltransferase family protein.
Os01g0176200	2.06493	9.38886e-08	1.8911e-05	up	UDP-glucuronosyl/UDP-glucosyltransferase family protein.
Os01g0736100	11.9432	7.03047e-07	8.10141e-05	up	UDP-glucuronosyl/UDP-glucosyltransferase family protein.
Os06g0289200	3.07951	4.10182e-08	1.0672e-05	up	UDP-glucuronosyl/UDP-glucosyltransferase family protein.
Os07g0510400	6.625	1.29839e-07	2.37736e-05	up	UDP-glucuronosyl/UDP-glucosyltransferase family protein.
Os09g0330000	2.02266	1.67566e-10	1.99693e-07	up	UDP-glucuronosyl/UDP-glucosyltransferase family protein.
Os06g0590700	2.19757	5.85404e-07	7.08022e-05	up	UDP-glucuronosyl/UDP-glucosyltransferase family protein.
Os07g0502900	3.30537	4.77204e-07	6.10261e-05	up	UDP-glucuronosyl/UDP-glucosyltransferase family protein.
Os03g0723400	10.0126	1.53946e-07	2.67694e-05	up	UFG2.
Os01g0363300	4.57564	1.91275e-08	6.06933e-06	up	Uncharacterised protein family UPF0497trans-membrane plant subgroup domain containing protein.
Os05g0245300	4.58361	2.09991e-11	6.76925e-08	up	Uncharacterised protein family UPF0497trans-membrane plant subgroup domain containing protein.
Os01g0363300	5.00242	1.13481e-12	2.12997e-08	up	Uncharacterised protein family UPF0497trans-membrane plant subgroup domain containing protein.
Os02g0158500	2.04144	3.73394e-08	9.97777e-06	up	Uncharacterized plant-specific domain 01627 containing protein.
Os02g0205200	13.2704	3.038e-08	8.62012e-06	up	Unidentified precursor.
Os05g0170200	3.30933	1.75927e-06	0.00016507	up	universal stress protein family protein.
Os05g0170200	9.53974	3.59741e-08	9.71289e-06	up	universal stress protein family protein.
Os08g0101900	2.46197	7.46321e-07	8.47062e-05	up	UPF0497 membrane protein 2.
Os07g0602900	3.75017	3.143e-07	4.46243e-05	up	UPF0737 protein 1.
Os07g0602900	2.32657	2.61252e-08	7.69439e-06	up	UPF0737 protein 1.
Os01g0511100	2.76574	9.82178e-07	0.000104763	up	UspA domain containing protein.
Os08g0206900	2.38705	6.07708e-06	0.000446863	up	UTP--glucose-1-phosphate uridylyltransferase family protein.
Os01g0222500	2.32144	7.78945e-06	0.000547815	up	Vacuolar ATP synthase subunit E (EC 3.6.3.14) (V-ATPase E subunit) (Vacuolar proton pump E subunit).
Os02g0175400	6.13462	2.43259e-10	2.34616e-07	up	Vacuolar H(+)-ATPase subunit A (Fragment).
Os02g0175400	2.02736	5.30913e-07	6.58242e-05	up	Vacuolar H(+)-ATPase subunit A (Fragment).
Os02g0175400	2.34712	5.93979e-10	4.23988e-07	up	Vacuolar H(+)-ATPase subunit A (Fragment).
Os06g0178900	2.19236	1.05937e-08	3.90184e-06	up	Vacuolar H+-pyrophosphatase (EC 3.6.1.1) (Ovp2).
Os01g0756200	2.50986	2.10693e-06	0.000189955	up	VirE2-interacting protein VIP1.
Os07g0154100	34.8873	7.57519e-09	3.04124e-06	up	Viviparous-14.
Os07g0154100	10.3532	5.73406e-08	1.33387e-05	up	Viviparous-14.
Os04g0645200	26.7447	1.27869e-07	2.35063e-05	up	VQ domain containing protein.
Os12g0635400	3.81731	2.87325e-11	8.16168e-08	up	VQ domain containing protein.
Os07g0686600	3.12504	8.16808e-07	9.09047e-05	up	VQ domain containing protein.
Os09g0502100	2.16636	8.47149e-06	0.000587021	up	VWA domain containing proteinRNA binding proteinRegulation of vegetative growth and development
Os11g0104400	2.15448	6.2457e-09	2.62435e-06	up	W-3 fatty acid desaturase.
Os11g0454300	10.1418	8.17208e-07	9.09047e-05	up	Water-stress inducible protein RAB21.
Os03g0820500	12.9889	1.52451e-07	2.66773e-05	up	WCOR719.
Os03g0820500	10.7131	1.2927e-09	7.78104e-07	up	WCOR719.
Os08g0531200	2.27814	2.61824e-07	3.92143e-05	up	WD40 repeat domain containing protein.
Os12g0178633	5.43697	8.3746e-06	0.000581473	up	WD40 repeat domain containing protein.
Os04g0599800	90	9.59627e-07	0.000103104	up	WD40 repeat-like domain containing protein.
Os01g0859100	2.18059	3.98903e-07	5.32456e-05	up	WIP1 protein (Fragment).
Os01g0859100	2.51824	6.51407e-07	7.66828e-05	up	WIP1 protein (Fragment).
Os01g0132000	3.90651	1.8322e-06	0.000170333	up	Wound-induced protease inhibitor (WIP1).
Os01g0289600	2.0372	4.95375e-07	6.26543e-05	up	WRKY transcription factor 28.
Os06g0504900	4.83099	3.80418e-08	1.00914e-05	up	WRKY transcription factor 31.
Os05g0322900	2.30022	4.06301e-07	5.40245e-05	up	WRKY transcription factor 45.
Os01g0821600	17.2603	2.11067e-08	6.54218e-06	up	WRKY transcription factor 48-like protein (WRKY transcription factor 21).
Os01g0821600	33.493	3.45167e-09	1.6723e-06	up	WRKY transcription factor 48-like protein (WRKY transcription factor 21).
Os01g0972800	2.31189	9.16046e-10	5.93602e-07	up	WRKY1 (WRKY transcription factor 17).
Os04g0471700	4.80517	2.04794e-07	3.27799e-05	up	WRKY10 (WRKY transcription factor 35).
Os08g0242400	14.1429	9.92707e-09	3.70899e-06	up	WUSCHEL-related homeobox 8.
Os10g0347000	4.14868	4.47324e-07	5.79375e-05	up	X8 domain containing protein.
Os11g0427700	2.3806	8.31914e-07	9.21719e-05	up	Xanthine/uracil/vitamin C permease family protein.
Os04g0604900	3.26988	2.16118e-08	6.66884e-06	up	Xyloglucan endotransglycosylase (Fragment).
Os08g0237800	5.06652	7.75396e-08	1.64741e-05	up	Xyloglucan endotransglycosylase (Fragment).
Os04g0604900	2.55641	8.42257e-11	1.43746e-07	up	Xyloglucan endotransglycosylase (Fragment).
Os06g0696600	2.06654	8.63658e-09	3.34747e-06	up	Xyloglucan endo-transglycosylase homolog.
Os07g0529700	3.14695	2.65242e-06	0.000227984	up	Xyloglucan endo-transglycosylase-like protein.
Os08g0334900	2.55566	3.29763e-08	9.15397e-06	up	Xyloglucan fucosyltransferase family protein.
Os02g0767700	16.3239	4.44019e-06	0.000345617	up	YbaK/aminoacyl-tRNA synthetase associated region domain containing protein.
Os02g0116300	3.6463	5.18231e-06	0.000390981	up	Yellow stripe-like transporter 17.
Os08g0467100	12.1667	8.68663e-06	0.000598717	up	Zinc fingerC2H2 domain containing protein.
Os05g0386700	16.0752	2.26485e-08	6.90142e-06	up	Zinc fingerC2H2-type domain containing protein.
Os11g0150450	2.35439	3.57743e-06	0.000290171	up	Zinc fingerC3HC4 type family proteinexpressed.
Os07g0596000	3.1536	1.40991e-07	2.52633e-05	up	Zinc fingerDHHC-type domain containing protein.
Os07g0596000	2.15285	3.45969e-11	9.25686e-08	up	Zinc fingerDHHC-type domain containing protein.
Os04g0551600	5.29272	7.98795e-08	1.67822e-05	up	Zinc fingerFYVE/PHD-type domain containing protein.
Os04g0586700	3.51355	5.04241e-07	6.33357e-05	up	Zinc fingerRING/FYVE/PHD-type domain containing protein.
Os02g0738200	2.70263	8.29123e-08	1.72117e-05	up	Zinc fingerRING/FYVE/PHD-type domain containing protein.
Os05g0207400	2.91444	8.71432e-08	1.78754e-05	up	Zinc fingerRING/FYVE/PHD-type domain containing protein.
Os01g0865700	2.68574	2.50236e-06	0.000217338	up	Zinc fingerRING/FYVE/PHD-type domain containing protein.
