# Supplementary material for: Global N6-Methyladenosine Profiling Revealed the Tissue-Specific Epitranscriptomic Regulation of Rice Responses to Salt Stress
Source: Int J Mol Sci. 2022 Feb 14;23(4):2091. doi: 10.3390/ijms23042091 (PMC8875919; doi:10.3390/ijms23042091)
Supplement: Supplementary file 1 [file ijms-23-02091-s001.zip › Table S4_List of the genes with down-regulated m6A methylation in roots under salt stress.xlsx]

## Sheet: Table Sx
Table S4_List of the genes with down-regulated m6A methylation in roots under salt stress
GeneName	Foldchange	P_value	FDR	Regulation	description
Os01g0140700	2.77776	4.39416e-07	5.71188e-05	down	RAV2 DNA binding / transcription factor.
Os11g0264300	2.42032	1.00846e-06	0.000106938	down	RWP-RK domain containing proteinexpressed.
Os09g0284600	3.4766	1.36561e-06	0.000135328	down	enhancer of polycomb-like protein101.
Os10g0475000	8.52482	6.55897e-07	7.71238e-05	down	Conserved hypothetical protein.
Os07g0421932	3.31184	8.79592e-10	5.75374e-07	down	Hypothetical gene.
Os01g0609000	14	5.7761e-06	0.000428683	down	Pleiotropic drug resistance protein 3.
Os03g0701000	2.54052	1.36082e-06	0.000134918	down	cDNA clone:J013135O16full insert sequence.
Os02g0137700	2.3971	4.70125e-08	1.1668e-05	down	NAD(P)-binding domain containing protein.
Os11g0569600	2.57009	4.49915e-06	0.000349158	down	Receptor kinase-like protein.
Os01g0628700	2.15793	6.90258e-06	0.000495269	down	Cytochrome P450.
Os01g0220700	2.47601	1.10701e-11	5.00686e-08	down	predicted protein.
Os03g0165266	4.35506	2.06683e-09	1.12194e-06	down	Hypothetical conserved gene.
Os05g0241400	8.28226	8.80913e-09	3.38374e-06	down	Profilin/allergen domain containing protein.
Os10g0556200	2.22531	1.23065e-06	0.000124726	down	Hypothetical conserved gene.
Os04g0692750	9.06796	8.90263e-06	0.000610168	down	SNF2 family chromatin-remodeling helicaseSyncytial endosperm development
Os10g0100300	2.14511	2.56872e-10	2.39934e-07	down	NAD(P)-binding domain containing protein.
Os04g0443900	2.11143	1.45267e-07	2.58233e-05	down	RuBisCO large subunit-binding protein subunit betachloroplastic.
Os05g0468550	5.19247	3.3972e-06	0.0002791	down	Hypothetical gene.
Os08g0289400	7.84984	3.13987e-09	1.54725e-06	down	SNF2-related domain containing protein.
Os01g0297200	2.40492	1.29241e-07	2.36872e-05	down	ATPaseAAA-typecore domain containing protein.
Os02g0574100	2.92844	5.46829e-12	3.93313e-08	down	Sugar/inositol transporter domain containing protein.
Os01g0382700	2.18179	2.23755e-07	3.4988e-05	down	stress regulated protein.
Os06g0652000	2.24209	1.35155e-08	4.70628e-06	down	DNA-directed RNA polymerase.
Os07g0115300	2.15238	1.06413e-06	0.000111783	down	Peroxidase2 precursor (EC 1.11.1.7).
Os11g0249000	2.06799	1.42906e-08	4.89922e-06	down	NB-ARC domain containing protein.
Os07g0679100	6.52761	1.25027e-06	0.000126383	down	Conserved hypothetical protein.
Os05g0390100	2.75342	6.76486e-11	1.26948e-07	down	Dynamin family protein.
Os08g0522400	2.24443	5.32821e-08	1.27299e-05	down	APX6 L-ascorbate peroxidase/ heme binding / peroxidase.
Os12g0640950	3.23256	8.31053e-09	3.26071e-06	down	Hypothetical protein.
Os08g0549200	2.79858	5.45301e-08	1.29228e-05	down	Beta-galactosidase.
Os12g0263800	42.9459	5.20095e-09	2.26571e-06	down	Isoflavone reductase-like protein 1.
Os03g0113000	2.02845	8.72559e-08	1.78878e-05	down	Serine/threonine protein kinase domain containing protein.
Os04g0525100	2.52664	2.79684e-06	0.000238273	down	UDP-glucuronosyl/UDP-glucosyltransferase family protein.
Os10g0125600	3.25578	1.1955e-06	0.000122029	down	Hypothetical protein.
Os04g0507500	2.54536	7.51791e-07	8.50942e-05	down	OSIGBa0157A06.7 protein.
Os01g0290000	2.0053	8.76562e-07	9.60769e-05	down	retrotransposon protein SINE subclass.
Os02g0212900	7.00552	6.3914e-06	0.000466501	down	Protein kinase domain containing proteinexpressed.
Os10g0329900	11.1842	7.39869e-07	8.41834e-05	down	Protein kinase domain containing protein.
Os09g0321200	12.9103	7.55763e-09	3.04008e-06	down	carotenoid cleavage dioxygenase.
Os08g0521800	2.06001	2.5728e-07	3.87578e-05	down	Protein of unknown function DUF1997 domain containing protein.
Os12g0617900	2.1448	3.36033e-07	4.68886e-05	down	Serine/threonine protein phosphatase.
Os11g0569600	3.33801	4.97705e-07	6.27927e-05	down	Receptor kinase-like protein.
Os08g0498400	2.02129	2.13498e-06	0.000191934	down	Caffeoyl-CoA O-methyltransferase (Fragment).
Os05g0153300	7.83425	8.73909e-07	9.5881e-05	down	Lipaseclass 3 domain containing protein.
Os11g0130300	3.3754	2.13875e-06	0.000192197	down	Nse1 non-SMC component of SMC5-6 complex family protein.
Os09g0369400	2.30268	4.97524e-09	2.18399e-06	down	predicted protein.
Os02g0618200	2.28674	5.68744e-08	1.32664e-05	down	Signal transduction response regulatorreceiver region domain containing protein.
Os06g0498400	2.45071	9.77373e-06	0.000658873	down	Alpha-glucan water dikinase (Fragment).
Os07g0568500	5.76557	2.22124e-06	0.000197633	down	Peptidase asparticactive site domain containing protein.
Os10g0538450	2.21326	4.43771e-08	1.11906e-05	down	Hypothetical protein.
Os04g0684500	6.60444	5.07619e-08	1.22975e-05	down	Hypothetical conserved gene.
Os01g0701600	3.12974	1.4275e-06	0.00014024	down	Hypothetical protein.
Os03g0126300	2.09812	1.31325e-07	2.39401e-05	down	cDNA clone:001-042-G03full insert sequence.
Os08g0547900	4.40435	3.66561e-08	9.85872e-06	down	Flavonoid 3-monooxygenase.
Os11g0173500	2.04328	7.16877e-10	4.93863e-07	down	Leucine-rich repeattypical subtype domain containing protein.
Os03g0216766	2.00371	9.57069e-06	0.000647713	down	Hypothetical gene.
Os04g0640600	3.04738	9.71869e-12	4.70152e-08	down	OSIGBa0138H21-OSIGBa0138E01.13 protein.
Os09g0280500	2.03902	1.95632e-07	3.1705e-05	down	Transcription factor HBP-1b(C38) (Fragment).
Os11g0667700	2.62195	1.87513e-07	3.08688e-05	down	Protein kinase domain containing proteinexpressed.
Os11g0245200	2.44638	6.59192e-06	0.000477733	down	leucine-rich repeat family protein / protein kinase family protein.
Os10g0461100	8.22222	9.76956e-09	3.65673e-06	down	PsbP family proteinexpressed.
Os09g0509350	3.68519	4.28327e-06	0.000335861	down	Hypothetical protein.
Os12g0609200	2.28161	7.14368e-08	1.55866e-05	down	Conserved hypothetical protein.
Os06g0320100	2.14721	8.13421e-10	5.44104e-07	down	Protein of unknown function DUF773 family protein.
Os01g0921200	3.86304	1.61197e-07	2.7705e-05	down	Mannosyl-oligosaccharide glucosidaseN-glycan formationAuxin-mediated root development
Os03g0149300	2.3539	3.0403e-09	1.51004e-06	down	Protein of unknown function DUF6transmembrane domain containing protein.
Os01g0728900	3.95185	3.19501e-10	2.75555e-07	down	Hypothetical gene.
Os03g0276800	27.5534	3.78799e-09	1.78722e-06	down	Heat shock protein Hsp70 family protein.
Os06g0225400	2.07624	4.09917e-07	5.43484e-05	down	Conserved hypothetical protein.
Os05g0551801	2.18484	3.03889e-07	4.36997e-05	down	Hypothetical gene.
Os02g0817900	2.52111	2.53411e-08	7.52832e-06	down	Cytochrome P450 family protein.
Os03g0324900	2.69552	1.25707e-06	0.000126876	down	Zinc fingerRING/FYVE/PHD-type domain containing protein.
Os08g0337700	3.09091	7.53625e-06	0.000532331	down	RabGAP/TBC domain containing protein.
Os02g0105800	2.60342	2.41623e-06	0.000210961	down	Cyclin-like F-box domain containing protein.
Os09g0530000	2.62098	5.04146e-07	6.33357e-05	down	Rhodanese-like domain containing protein.
Os04g0556000	2.03256	9.2943e-11	1.51396e-07	down	heavy metal ATPase.
Os06g0112100	26.7027	7.78626e-08	1.65258e-05	down	Nucleoside phosphorylasefamily 1 domain containing protein.
Os04g0630800	4.89062	4.11761e-06	0.000325829	down	Anthocyanidin reductase.
Os10g0400100	3.52023	3.89703e-08	1.0264e-05	down	Methionyl-tRNA synthetaseclass Ia domain containing protein.
Os05g0387200	3.06873	9.29453e-06	0.000632118	down	UDP-sulfoquinovose synthase.
Os04g0483400	2.02504	4.98718e-06	0.000378948	down	H0805A05.2 protein.
Os09g0517900	2.61062	3.95329e-08	1.03537e-05	down	UDP-glucuronosyl/UDP-glucosyltransferase family protein.
Os01g0720800	2.69758	1.18387e-06	0.000121052	down	Hypothetical conserved gene.
Os04g0619200	2.27432	7.95052e-08	1.67528e-05	down	Hypothetical gene.
Os03g0262000	81.1	1.80933e-07	3.0042e-05	down	AtPIP5K1.
Os11g0690332	18.9756	7.96791e-06	0.000558	down	Protein kinase domain containing protein.
Os04g0549600	3.40456	3.39521e-08	9.34355e-06	down	OSIGBa0134H18.3 protein.
Os01g0802700	6.23125	8.76255e-10	5.75005e-07	down	Auxin efflux carrier domain containing protein.
Os04g0445000	2.51954	1.58062e-08	5.24837e-06	down	Potassium channel SKOR (Stelar K(+) outward rectifying channel).
Os05g0379500	2.74728	8.96247e-07	9.7614e-05	down	Conserved hypothetical protein.
Os03g0206750	2.14855	3.1949e-10	2.75555e-07	down	Hypothetical protein.
Os08g0531300	2.6285	4.34057e-06	0.000339456	down	yrdC family protein.
Os09g0564200	3.06401	3.92678e-07	5.27031e-05	down	Hypothetical conserved gene.
Os02g0221300	14.8906	2.7587e-06	0.000235702	down	cDNA clone:001-114-H08full insert sequence.
Os08g0202300	2.93947	1.19907e-07	2.24102e-05	down	SHR5-receptor-like kinase (Fragment).
Os08g0431700	3.66953	8.69438e-07	9.54915e-05	down	Hypothetical protein.
Os10g0488850	11.4835	3.99122e-06	0.000317159	down	Hypothetical gene.
Os04g0659200	2.32174	3.84988e-07	5.19738e-05	down	Hypothetical protein.
Os06g0721600	3.44816	1.34705e-09	8.00362e-07	down	Hypothetical conserved gene.
Os04g0378575	2.22773	2.67088e-08	7.81082e-06	down	NBS-LRR protein (Fragment).
Os01g0330200	8.50565	4.05058e-07	5.3911e-05	down	Peptidase C1Apapain family protein.
Os01g0704200	69.5	3.07987e-06	0.00025783	down	predicted protein.
Os06g0130000	6.84793	4.72186e-07	6.05337e-05	down	ATP binding.
Os10g0140700	2.27021	4.17248e-07	5.50915e-05	down	Hypothetical conserved gene.
Os03g0373500	2.83339	2.20662e-09	1.17778e-06	down	Hypothetical protein.
Os07g0448100	2.08991	5.81718e-07	7.04796e-05	down	Plasma membrane integral protein ZmPIP2-6.
Os10g0162842	3.77098	9.55115e-08	1.91264e-05	down	Hypothetical protein.
Os01g0113350	5.22047	7.53823e-07	8.52311e-05	down	Hypothetical conserved gene.
Os04g0278900	2.27891	3.23256e-08	9.02109e-06	down	tRNA-dihydrouridine synthase domain containing protein.
Os08g0521200	3.76562	1.14807e-07	2.17433e-05	down	Receptor-like protein kinase 1.
Os07g0536800	5.10674	7.39155e-06	0.00052365	down	Hypothetical conserved gene.
Os12g0105300	6.27394	1.24772e-10	1.74182e-07	down	Actin-binding FH2 domain containing protein.
Os02g0497500	3.32512	7.72416e-08	1.64276e-05	down	DNA repair protein Rad50.
Os10g0547500	2.72062	3.52859e-07	4.86337e-05	down	Divalent ion symporter domain containing protein.
Os01g0248500	2.28606	6.29051e-07	7.4559e-05	down	Pathogen-related protein.
Os06g0339500	2.10345	2.02324e-08	6.34311e-06	down	OSIGBa0137A06.2 protein.
Os07g0151800	3.30748	9.2812e-06	0.000631565	down	Conserved hypothetical protein.
Os08g0562300	2.72115	3.24502e-07	4.57749e-05	down	Zinc fingerC2H2-type domain containing protein.
Os06g0255700	3.39533	4.1196e-08	1.06945e-05	down	DEAD-like helicaseN-terminal domain containing protein.
Os01g0359400	8.13559	6.93282e-07	8.02074e-05	down	NB-ARC domain containing protein.
Os08g0250900	2.10088	1.23228e-07	2.28754e-05	down	Conserved hypothetical protein.
Os01g0364800	3.03399	1.18394e-12	2.12997e-08	down	Protein kinasecatalytic domain domain containing protein.
Os07g0153150	7.56102	6.52221e-08	1.46132e-05	down	Conserved hypothetical protein.
Os09g0471800	3.78963	5.31554e-09	2.30112e-06	down	WAK80 - OsWAK receptor-like protein kinase.
Os04g0581600	3.06608	3.22172e-08	9.01565e-06	down	UDP-glucose dehydrogenase.
Os06g0674400	2.09641	4.17182e-06	0.000329239	down	Conserved hypothetical protein.
Os05g0379500	2.58088	1.52293e-08	5.13095e-06	down	Conserved hypothetical protein.
Os01g0173600	20.2766	4.2057e-08	1.08226e-05	down	Glyoxalase/bleomycin resistance protein/dioxygenase domain containing protein.
Os06g0211300	5.20879	8.75339e-06	0.000602228	down	Short-chain dehydrogenase/reductase SDR domain containing protein.
Os03g0396900	2.83911	1.56789e-08	5.2228e-06	down	PIMT.
Os07g0525100	2.43016	1.50598e-09	8.72297e-07	down	Putative integral membrane protein
Os02g0514326	3.17892	2.16789e-07	3.42897e-05	down	Hypothetical protein.
Os04g0637000	2.28574	9.45701e-09	3.56225e-06	down	Basic leucine zipper protein (Liguleless2).
Os03g0325500	2.48822	3.06298e-07	4.39242e-05	down	Hypothetical conserved gene.
Os02g0689700	4.22927	5.01369e-07	6.31236e-05	down	Ribosomal protein L18P/L5E family protein.
Os10g0199500	3.17591	6.11955e-06	0.000449747	down	Hypothetical conserved gene.
Os03g0252900	2.524	1.07889e-06	0.000113018	down	MYB-like transcription factor DIVARICATA.
Os05g0583075	2.35912	4.44184e-06	0.000345645	down	Hypothetical protein.
Os09g0314200	3.97187	1.5495e-06	0.000149445	down	Disease resistance protein domain containing protein.
Os04g0421700	2.11898	5.84389e-10	4.20034e-07	down	FAR1 domain containing protein.
Os04g0208200	2.68464	2.09776e-06	0.000189395	down	Cysteine proteinase.
Os05g0380300	5.1762	1.05113e-11	4.84366e-08	down	NBS-LRR protein (Fragment).
Os02g0137700	6.63975	4.61602e-11	1.08326e-07	down	NAD(P)-binding domain containing protein.
Os02g0543100	13.9375	8.02936e-06	0.000561639	down	predicted protein.
Os01g0824000	57.8	3.2028e-06	0.000265716	down	Conserved hypothetical protein.
Os03g0339900	3.64393	5.40077e-11	1.16053e-07	down	Serine/threonine protein kinase.
Os01g0612700	3.42364	1.18385e-06	0.000121052	down	LSD1-like-type zinc finger proteinDisease resistanceSaline-alkaline stress resistance
Os05g0584600	2.11858	1.62344e-06	0.000154848	down	ATPaseAAA-typecore domain containing protein.
Os04g0369600	2.39809	4.96219e-07	6.26846e-05	down	OSIGBa0107E14.3 protein.
Os03g0225700	2.28238	2.53504e-07	3.83424e-05	down	Wall-associated kinaseBiotic stress response
Os01g0232500	2.83436	1.57649e-06	0.000151379	down	PFU3/UBC26 (UBIQUITIN-CONJUGATING ENZYME 26) ubiquitin-protein ligase.
Os11g0105750	3.59218	1.92337e-07	3.13794e-05	down	Quinonprotein alcohol dehydrogenase-like domain containing protein.
Os04g0445000	3.24436	1.36212e-07	2.46453e-05	down	Potassium channel SKOR (Stelar K(+) outward rectifying channel).
Os04g0391000	74.1	1.05801e-06	0.000111196	down	OSIGBa0132D06.6 protein.
Os04g0119000	128	1.06625e-09	6.68351e-07	down	H0716A07.5 protein.
Os08g0300200	2.49656	4.52907e-07	5.85143e-05	down	plant synaptotagmin.
Os12g0510500	2.04379	5.38708e-08	1.28252e-05	down	Conserved hypothetical protein.
Os07g0158900	2.56618	8.99426e-07	9.78477e-05	down	Hypothetical conserved gene.
Os05g0535300	120.8	3.23245e-09	1.58086e-06	down	F-box protein.
Os08g0466200	3.24571	6.03635e-07	7.23739e-05	down	KUP-related potassium transporter.
Os07g0484800	6.32367	1.9604e-06	0.000179952	down	Adenine phosphoribosyltransferase (EC 2.4.2.7)-like protein.
Os07g0147500	3.55808	5.86548e-07	7.08991e-05	down	Photosystem II 10 kDa polypeptidechloroplast precursor.
Os02g0301100	3.01999	1.95799e-10	2.10283e-07	down	RAG1-activating protein 1 homologue domain containing protein.
Os07g0517100	2.44647	7.42291e-08	1.59754e-05	down	18.8 kDa class V heat shock protein.
Os07g0545800	3.32749	3.74604e-06	0.000301488	down	Chitin-inducible gibberellin-responsive protein.
Os01g0685500	2.87489	1.4339e-06	0.00014075	down	DNA ligase.
Os07g0684400	2.63303	5.5704e-06	0.000415798	down	Hypothetical protein.
Os07g0280600	2.57122	1.96749e-08	6.19856e-06	down	Hypothetical protein.
Os05g0232200	2.33911	3.00774e-07	4.33871e-05	down	Conserved hypothetical protein.
Os05g0231100	2.79876	2.44152e-07	3.72674e-05	down	Hypothetical conserved gene.
Os07g0150100	2.03791	3.00247e-07	4.33417e-05	down	Protein of unknown function DUF221 domain containing protein.
Os04g0608600	4.46567	4.36768e-08	1.11059e-05	down	Alkyl hydroperoxide reductase subunit C/ Thiol specific antioxidant domain containing protein.
Os09g0507100	2.71512	5.35708e-11	1.15714e-07	down	Squamosa-promoter binding-like protein 11.
Os03g0227700	2.64097	4.33789e-08	1.10709e-05	down	Cytochrome P450 family protein.
Os01g0642200	4.39359	2.50836e-08	7.47324e-06	down	Conserved hypothetical protein.
Os01g0339500	2.09446	1.77245e-06	0.000166081	down	No apical meristem protein.
Os03g0639700	2.18625	1.141e-06	0.000117686	down	protein recA.
Os01g0807000	8.72752	1.79315e-07	2.98659e-05	down	Conserved hypothetical protein.
Os02g0448500	3.33296	3.83402e-06	0.000307316	down	Hypothetical protein.
Os05g0104650	10.7629	3.55435e-06	0.00028875	down	Formylglycinamide ribonucleotide amidotransferase (Fragment).
Os07g0301200	2.23972	1.27537e-07	2.34661e-05	down	STRS1 (STRESS RESPONSE SUPPRESSOR 1) ATP-dependent helicase.
Os05g0380300	7.03828	4.98796e-08	1.21955e-05	down	NBS-LRR protein (Fragment).
Os03g0807400	2.55431	7.37298e-07	8.4004e-05	down	Pentatricopeptide repeat domain containing protein.
Os02g0542200	4.63172	2.72914e-07	4.04517e-05	down	H0525E10.9 protein.
Os05g0381700	2.16044	9.36796e-09	3.54158e-06	down	calmodulin-binding protein-related.
Os07g0110000	4.73118	7.33301e-06	0.000520124	down	Hypothetical conserved gene.
Os04g0416100	3.11127	7.10507e-07	8.16243e-05	down	Transcription factor E2F1 (E2F-1) (Fragment).
Os03g0586700	3.23214	8.77662e-06	0.00060344	down	Conserved hypothetical protein.
Os01g0311800	2.90278	3.31726e-06	0.000273616	down	Pectinesterase.
Os09g0311600	2.6404	1.10928e-06	0.000115372	down	NBS-LRR type resistance protein (Fragment).
Os05g0379500	3.08907	4.44074e-08	1.11906e-05	down	Conserved hypothetical protein.
Os05g0473000	4.10068	2.0193e-07	3.2384e-05	down	Streptomyces cyclase/dehydrase family protein.
Os02g0582900	5.01553	2.84615e-10	2.58285e-07	down	Conserved hypothetical protein.
Os12g0524201	3.84337	9.18392e-07	9.9446e-05	down	Hypothetical conserved gene.
Os11g0118500	2.36875	1.8389e-10	2.05562e-07	down	protein binding / signal transducer.
Os11g0134100	4.09205	2.58794e-06	0.000223553	down	LG27/30-like.
Os02g0137700	3.64028	1.21725e-08	4.34793e-06	down	NAD(P)-binding domain containing protein.
Os04g0330900	2.10421	1.99865e-11	6.68456e-08	down	Peptidase asparticcatalytic domain containing protein.
Os09g0287000	2.14156	1.85514e-06	0.000172042	down	Ethylene-responsive transcription factor 5
Os06g0133200	2.54624	2.75522e-07	4.06851e-05	down	Conserved hypothetical protein.
Os02g0152900	5.31549	3.81383e-09	1.79737e-06	down	Nucleus-encoded chloroplast protein
Os08g0205900	65.6	3.79652e-06	0.000305012	down	Viroid RNA-binding protein (Fragment).
Os04g0657100	2.47588	6.06312e-06	0.000446098	down	Farnesyl diphosphate synthase (Fragment).
Os04g0228300	3.4154	9.76411e-08	1.94123e-05	down	Hypothetical conserved gene.
Os01g0388500	2.04455	1.39758e-08	4.82946e-06	down	Fibronectintype III-like fold.
Os11g0153700	2.31458	6.88421e-12	3.96534e-08	down	Signal recognition particle 54 kDa proteinchloroplast precursor (SRP54) (54 chloroplast protein) (54CP) (FFC).
Os02g0586000	4.27483	2.42154e-07	3.70858e-05	down	Quinonprotein alcohol dehydrogenase-like domain containing protein.
Os01g0623200	2.77562	9.52306e-06	0.000645016	down	C4-dicarboxylate transporter/malic acid transport protein.
Os01g0959900	2.54139	2.38711e-07	3.67483e-05	down	NDH-O (NAD(P)H:plastoquinone dehydrogenase complex subunit O).
Os04g0445000	3.96713	6.18104e-08	1.40538e-05	down	Potassium channel SKOR (Stelar K(+) outward rectifying channel).
Os02g0642850	12.9098	2.41326e-08	7.25768e-06	down	Conserved hypothetical protein.
Os06g0597400	2.00338	4.06573e-07	5.40434e-05	down	PINHEAD/ZWILLE (PNH/ZLL) homologous proteinShoot apical meristem (SAM) maintenance and leaf development
Os01g0110100	2.9939	2.62801e-06	0.00022626	down	Phosphate (Pi) transporterPi homeostasis
Os04g0551700	2.34749	4.44843e-07	5.77061e-05	down	PAP fibrillin family protein.
Os12g0541500	2.43714	8.76271e-06	0.00060277	down	Elongation factor Ts.
Os10g0162838	5.20546	5.92219e-09	2.50875e-06	down	Hypothetical protein.
Os02g0731600	3.24922	2.60945e-11	7.56782e-08	down	Threonine endopeptidase.
Os12g0194266	2.25813	8.75211e-09	3.38276e-06	down	Hypothetical protein.
Os05g0524300	2.1466	1.51595e-06	0.00014679	down	Mitochondrial processing peptidase.
Os04g0411400	2.97174	8.74117e-06	0.000601697	down	Terminal flower 1-like protein.
Os03g0597200	2.34449	4.37333e-07	5.69815e-05	down	Pentatricopeptide repeat proteinChloroplast development
Os01g0216000	24.4204	1.96266e-08	6.19593e-06	down	LipaseGDSL domain containing protein.
Os01g0810500	3.49718	1.33075e-08	4.64555e-06	down	Hypothetical conserved gene.
Os08g0531600	2.88211	9.11943e-06	0.000622455	down	Transcription factorPositive regulator of cell proliferationControl of grain sizeshape and quality
Os05g0340000	9.5817	4.1412e-08	1.07207e-05	down	Conserved hypothetical protein.
Os11g0266500	3.71637	3.41445e-09	1.6562e-06	down	Conserved hypothetical protein.
Os04g0686650	2.30109	7.74308e-07	8.70489e-05	down	H0723C07.13 protein.
Os12g0118700	2.15409	2.53952e-07	3.83819e-05	down	Zinc fingerRING/FYVE/PHD-type domain containing protein.
Os02g0464500	2.52758	2.60891e-06	0.000224849	down	Protein of unknown function DUF3133 domain containing protein.
Os11g0587500	2.24514	1.60788e-11	5.90111e-08	down	RabGAP/TBC domain containing protein.
Os05g0584600	2.36637	5.47842e-12	3.93313e-08	down	ATPaseAAA-typecore domain containing protein.
Os12g0444800	4.20151	9.79522e-06	0.000660001	down	O-methyltransferase ZRP4.
Os08g0307400	5.64431	1.72677e-07	2.90166e-05	down	Phosphatidylinositol 3-kinase 1.
Os08g0543500	2.67418	4.6732e-06	0.00035957	down	NBS-LRR type resistance protein (Fragment).
Os01g0603700	2.48512	1.19362e-06	0.000121866	down	Hypothetical gene.
Os09g0485201	4.77405	4.08507e-07	5.42309e-05	down	photosystem I subunit VII.
Os10g0558900	2.61987	3.91495e-08	1.02956e-05	down	2OG-Fe (II) oxygenase family proteinRegulation of the secondary cell wall formation in leavesModulation of leaf rolling
Os09g0321200	63.1	8.05968e-06	0.000563665	down	carotenoid cleavage dioxygenase.
Os12g0218500	5.38617	3.41259e-07	4.73814e-05	down	Hypothetical conserved gene.
Os10g0499800	94.5	2.16835e-08	6.6711e-06	down	Conserved hypothetical protein.
Os02g0745200	14.1261	3.65257e-09	1.74718e-06	down	Hypothetical gene.
Os09g0380600	3.28285	3.41244e-07	4.73814e-05	down	Protein of unknown function DUF295 domain containing protein.
Os01g0803900	2.26319	3.77099e-06	0.000303312	down	Cytochrome P450 family protein.
Os03g0649000	2.77749	1.08871e-08	3.98863e-06	down	Conserved hypothetical protein.
Os04g0107650	5.20139	5.19059e-07	6.48391e-05	down	Arginine decarboxylase.
Os03g0109300	2.26747	7.56344e-08	1.61687e-05	down	Lysine decarboxylase-like protein.
Os01g0286600	2.52082	2.0365e-06	0.000185274	down	Plastidal protoporphyrinogen oxidase.
Os09g0443400	3.69833	2.1065e-07	3.35489e-05	down	Hypothetical conserved gene.
Os07g0150100	2.03627	5.36515e-10	3.91046e-07	down	Protein of unknown function DUF221 domain containing protein.
Os02g0582900	4.24751	1.15865e-06	0.000119091	down	Conserved hypothetical protein.
Os08g0510300	2.28663	4.39397e-06	0.00034297	down	Potassium uptake proteinkup domain containing protein.
Os01g0904700	2.12519	5.38701e-07	6.6551e-05	down	B-type response regulatorCytokinin signaling
Os01g0686100	2.70452	8.0845e-07	9.0154e-05	down	Hypothetical conserved gene.
Os12g0215100	5.17685	1.52589e-11	5.74832e-08	down	Hypothetical conserved gene.
Os03g0248200	2.69244	4.78793e-08	1.18124e-05	down	Cytochrome P450 family proteinexpressed.
Os04g0452100	2.88153	2.28672e-07	3.55589e-05	down	Cryptochrome 1bblue light photoreceptorRegulation of blue light-mediated de-etiolationBlue light-dependent inhibition of coleoptile and leaf elongation
Os03g0227700	2.15303	2.38135e-10	2.31288e-07	down	Cytochrome P450 family protein.
Os09g0108400	2.01293	8.4837e-06	0.000587573	down	Conserved hypothetical protein.
Os09g0410400	3.30141	1.15928e-08	4.19895e-06	down	Zinc fingerRING-type domain containing protein.
Os08g0158400	2.43557	2.95029e-07	4.28115e-05	down	Berberine bridge enzyme-like protein.
Os07g0105600	3.41117	1.58638e-08	5.25904e-06	down	Photosystem II oxygen evolving complex protein PsbQ family protein.
Os06g0574950	2.69565	1.23279e-07	2.28754e-05	down	Hypothetical gene.
Os12g0163800	3.22656	3.36241e-07	4.68886e-05	down	ATP binding protein.
Os05g0481900	9.25532	3.05352e-07	4.38188e-05	down	Auxin efflux carrier domain containing protein.
Os01g0687300	2.08308	1.40899e-07	2.52633e-05	down	Conserved hypothetical protein.
Os03g0335500	19.122	3.17385e-06	0.000264205	down	Protein kinasecore domain containing protein.
Os01g0781100	4.88889	4.95852e-09	2.18071e-06	down	NBS-LRR protein (Fragment).
Os11g0170400	10.5631	1.80168e-06	0.000168023	down	Conserved hypothetical protein.
Os11g0684100	3.43962	1.9796e-07	3.19815e-05	down	NB-ARC domain containing protein.
Os07g0280200	2.27489	1.01747e-07	1.99908e-05	down	AMP-dependent synthetase and ligase domain containing protein.
Os01g0102600	2.49176	1.13349e-07	2.15142e-05	down	shikimate kinase family protein.
Os05g0519600	2.33791	2.95599e-08	8.45876e-06	down	Hypothetical conserved gene.
Os03g0104400	79.3	5.73743e-07	6.9717e-05	down	Protein of unknown function DUF1677Oryza sativa domain containing protein.
Os07g0158900	2.51575	1.53414e-07	2.67217e-05	down	Hypothetical conserved gene.
Os07g0693800	2.19459	1.02585e-08	3.80658e-06	down	Plastid omega-3 fatty acid desaturase (Fragment).
Os07g0588800	2.63351	7.5469e-08	1.61517e-05	down	predicted protein.
Os01g0829100	2.79972	5.11501e-07	6.40378e-05	down	Ankyrin domain containing protein.
Os02g0832000	2.07227	7.22775e-06	0.000514418	down	Calmodulin-like-domain protein kinase CPK2.
Os09g0459600	6.73498	2.51203e-10	2.37094e-07	down	Calmodulin-binding protein phosphatase.
Os02g0771450	3.31402	1.67428e-07	2.84809e-05	down	Hypothetical conserved gene.
Os06g0348800	2.0609	1.84793e-07	3.04723e-05	down	Transfactor-like protein.
Os03g0200600	4.4175	7.44003e-08	1.59956e-05	down	predicted protein.
Os03g0786100	2.55971	9.65177e-08	1.92726e-05	down	Glycolate oxidase (EC 1.1.3.15) (Fragment).
Os01g0216000	102.2	1.3346e-08	4.65508e-06	down	LipaseGDSL domain containing protein.
Os12g0552300	67.7	3.98062e-06	0.000316498	down	Hypothetical conserved gene.
Os02g0137500	3.10702	8.92103e-06	0.000610992	down	histone acetyltransferase.
Os03g0298100	4.4322	9.77911e-06	0.000659129	down	Conserved hypothetical protein.
Os07g0542400	2.23198	3.19214e-07	4.51365e-05	down	receptor-like protein kinase RK20-1.
Os02g0257300	2.21199	9.76495e-07	0.000104294	down	Rhodanese-like domain containing protein.
Os09g0554300	2.38807	2.69522e-07	4.00922e-05	down	Auxin efflux carrier domain containing protein.
Os03g0689100	2.48687	5.55578e-06	0.000415005	down	predicted protein.
Os08g0268550	21.093	8.2384e-07	9.14767e-05	down	Conserved hypothetical protein.
Os06g0259000	2.1739	2.28424e-07	3.55492e-05	down	Hypothetical conserved gene.
Os12g0257000	3.03393	5.39943e-06	0.000405151	down	Serine carboxypeptidase 1.
Os02g0176700	2.05608	6.22948e-08	1.4133e-05	down	autoinhibited calcium ATPase.
Os01g0589400	2.11649	2.66463e-06	0.00022889	down	Pentatricopeptide repeat domain containing protein.
Os06g0286700	6.87578	7.92922e-06	0.00055576	down	Piz-t.
Os04g0475200	2.8694	9.67703e-06	0.000653417	down	OSIGBa0106G07.3 protein.
Os11g0564800	3.36012	2.60778e-06	0.000224799	down	Hypothetical protein.
Os01g0614400	2.27094	2.20683e-08	6.76941e-06	down	Conserved hypothetical protein.
Os10g0199500	2.27623	3.46845e-06	0.000283674	down	Hypothetical conserved gene.
Os08g0328050	2.15406	1.23243e-06	0.000124845	down	Hypothetical protein.
Os12g0121200	12.3447	3.0054e-08	8.5605e-06	down	Conserved hypothetical protein.
Os12g0257000	2.4041	3.38657e-12	2.98827e-08	down	Serine carboxypeptidase 1.
Os05g0207900	2.67209	3.87708e-08	1.0222e-05	down	Hypothetical conserved gene.
Os02g0507400	2.50222	2.10611e-07	3.35489e-05	down	OSIGBa0148P16.4 protein.
Os08g0163400	2.19615	6.77124e-07	7.87269e-05	down	Plastid RNA polymerase sigma factor.
Os05g0215033	11.7969	5.86575e-06	0.000434326	down	Hypothetical gene.
Os03g0392833	6.17347	7.14851e-07	8.20097e-05	down	Hypothetical protein.
Os04g0226800	13.5938	7.39959e-07	8.41834e-05	down	OSIGBa0135L04.4 protein.
Os12g0623800	4.70992	1.0984e-06	0.000114542	down	GLA1.
Os11g0216300	2.98046	9.25691e-12	4.70152e-08	down	ABC1 family proteinexpressed.
Os04g0538100	2.22182	1.13484e-11	5.00686e-08	down	Elongation factor GIII and V domain containing protein.
Os10g0444500	9.55039	8.49107e-13	2.05018e-08	down	Selenium binding protein.
Os02g0817900	2.28634	1.96544e-07	3.1803e-05	down	Cytochrome P450 family protein.
Os08g0202300	2.18043	8.1963e-09	3.23021e-06	down	SHR5-receptor-like kinase (Fragment).
Os03g0704200	7.26144	9.16515e-07	9.92687e-05	down	Zinc fingerMYND-type domain containing protein.
Os01g0944000	7.75476	4.81274e-08	1.18595e-05	down	Conserved hypothetical protein.
Os07g0469100	2.40389	1.69258e-07	2.87098e-05	down	Thylakoid membrane phosphoprotein 14 kDachloroplast precursor.
Os04g0583900	77.9	6.90787e-07	8.00334e-05	down	LHY protein.
Os04g0645100	2.15278	4.13784e-09	1.91738e-06	down	H0811D08.1 protein.
Os06g0107800	2.38466	4.39953e-06	0.000343225	down	B3 DNA-binding domain containing proteinInsect resistance
Os01g0759200	3.06596	5.45898e-08	1.29253e-05	down	PnC401 homologue.
Os12g0420400	3.85845	3.05759e-07	4.38622e-05	down	Photosystem I reaction center subunit XIchloroplastic.
Os01g0361500	2.66224	2.72348e-06	0.000233125	down	Phospholipid/glycerol acyltransferase domain containing protein.
Os02g0140200	11.3252	1.58935e-08	5.26469e-06	down	cycloartenol synthase.
Os09g0394600	3.87559	8.55232e-07	9.42705e-05	down	Endonuclease/exonuclease/phosphatase domain containing protein.
Os06g0367100	3.07751	2.03028e-06	0.000184894	down	starch branching enzyme III.
Os12g0127100	18	1.71019e-07	2.88668e-05	down	Nse1 non-SMC component of SMC5-6 complex family protein.
Os03g0297600	3.00177	1.15756e-07	2.188e-05	down	Streptomyces cyclase/dehydrase family protein.
Os04g0356600	3.99661	3.83593e-11	9.76729e-08	down	OSIGBa0105P02.3 protein.
Os10g0558600	88.6	1.55407e-07	2.6933e-05	down	Pentatricopeptide repeat domain containing protein.
Os12g0562100	2.17729	1.12937e-11	5.00686e-08	down	ferroportin protein family.
Os11g0264500	4.01258	2.30592e-09	1.22291e-06	down	Hypothetical conserved gene.
Os01g0597600	74.3	1.47518e-06	0.000143613	down	Amino acid transportertransmembrane domain containing protein.
Os06g0667000	2.87084	7.00522e-06	0.00050168	down	Serine/threonine protein kinase domain containing protein.
Os08g0553700	3.0113	2.16558e-06	0.000193768	down	Protein of unknown function DUF241plant family protein.
Os11g0592350	2.31974	6.47954e-07	7.6363e-05	down	Photosystem II reaction center protein K.
Os08g0109400	2.46542	1.05403e-07	2.04554e-05	down	AUX/IAA protein family protein.
Os01g0719800	2.86957	2.20833e-07	3.47438e-05	down	Hypothetical protein.
Os03g0700800	2.39767	7.93161e-08	1.6723e-05	down	Ethylene insensitive 2.
Os05g0593550	2.0717	4.23177e-08	1.08468e-05	down	Hypothetical conserved gene.
Os06g0298400	2.7768	9.19429e-09	3.48864e-06	down	WW/Rsp5/WWP domain containing protein.
Os01g0971100	2.16269	9.23411e-11	1.51367e-07	down	Drought induced 19 family protein.
Os12g0105300	2.06642	2.60603e-07	3.90621e-05	down	Actin-binding FH2 domain containing protein.
Os02g0301100	3.33326	6.60103e-08	1.47659e-05	down	RAG1-activating protein 1 homologue domain containing protein.
Os08g0522400	7.13953	2.87896e-07	4.21018e-05	down	APX6 L-ascorbate peroxidase/ heme binding / peroxidase.
Os11g0160550	12.7105	1.20684e-06	0.000122974	down	GRAS family transcription factor containing protein.
Os04g0523100	2.2764	4.73367e-06	0.000363615	down	OSIGBa0153E02-OSIGBa0093I20.5 protein.
Os04g0634400	3.15393	1.94856e-07	3.16353e-05	down	H0315F07.5 protein.
Os05g0253200	2.76391	1.65811e-10	1.9946e-07	down	Conserved hypothetical protein.
Os05g0596600	2.66392	3.35784e-07	4.6888e-05	down	SMC5 protein.
Os11g0105750	2.19719	4.84128e-07	6.15886e-05	down	Quinonprotein alcohol dehydrogenase-like domain containing protein.
Os10g0162844	7.79333	1.4794e-07	2.61749e-05	down	Wall-associated kinase domain containing protein.
Os08g0203700	2.91122	1.16074e-11	5.0672e-08	down	SHR5-receptor-like kinase (Fragment).
Os03g0170200	8.95161	3.89595e-06	0.000311019	down	Conserved hypothetical protein.
Os01g0810600	3.77023	6.5686e-06	0.000476583	down	cDNAclone: J100063K14full insert sequence.
Os09g0447500	4.10318	5.8617e-08	1.35055e-05	down	Cytochrome P450 family protein.
Os10g0208900	5.41276	3.6749e-08	9.87729e-06	down	Hypothetical conserved gene.
Os02g0236800	2.03523	4.99068e-07	6.29046e-05	down	Peroxidase (EC 1.11.1.7).
Os04g0603400	2.12121	1.01313e-06	0.000107405	down	OSIGBa0118P15.3 protein.
Os08g0543500	2.10034	3.00486e-07	4.33606e-05	down	NBS-LRR type resistance protein (Fragment).
Os02g0635600	2.97542	5.0104e-06	0.000380434	down	Tyrosine protein kinase domain containing protein.
Os02g0738200	19.2632	3.05883e-10	2.70483e-07	down	Zinc fingerRING/FYVE/PHD-type domain containing protein.
Os06g0680500	2.85701	4.04638e-12	3.26155e-08	down	Glutamate receptor 3.4 precursor (Ligand-gated ion channel 3.4) (AtGLR4). Splice isoform 2.
Os11g0643700	2.13182	8.89657e-07	9.71206e-05	down	predicted protein.
Os01g0102900	2.72893	3.64424e-09	1.74521e-06	down	Light-regulated proteinRegulation of light-dependent attachment of LEAF-TYPE FERREDOXIN-NADP+ OXIDOREDUCTASE (LFNR) to the thylakoid membrane
Os12g0121200	312	2.94049e-09	1.47104e-06	down	Conserved hypothetical protein.
Os01g0966200	2.85582	1.88032e-08	5.98473e-06	down	Protein of unknown function YGGT family protein.
Os01g0814300	8.23164	3.03299e-07	4.36451e-05	down	Pentatricopeptide repeat domain containing protein.
Os07g0153150	15.1471	9.80618e-07	0.000104627	down	Conserved hypothetical protein.
Os01g0810100	2.70498	1.39217e-10	1.81562e-07	down	Ribonuclease III domain containing protein.
Os08g0342400	4.9977	1.96376e-08	6.19593e-06	down	Bifunctional aspartokinase/homoserine dehydrogenase 1chloroplast precursor (AK-HD 1) (AK-HSDH 1) [Includes: Aspartokinase (EC 2.7.2.4) Homoserine dehydrogenase (EC 1.1.1.3)].
Os06g0343100	2.47292	1.67455e-06	0.000158654	down	predicted protein.
Os05g0536800	4.6087	7.2852e-08	1.58185e-05	down	F-box domaincyclin-like domain containing protein.
Os08g0260600	2.29229	1.13905e-07	2.16099e-05	down	Tetraspanin domain containing protein.
Os09g0558900	2.4465	1.38269e-07	2.49186e-05	down	NADPH-cytochrome P450 reductase (Fragment).
Os02g0112600	3.92072	3.31566e-07	4.64241e-05	down	High-affinity nitrate transporterNitrate uptakeNitrate transport
Os01g0210800	9.48485	6.55172e-06	0.000475525	down	Conserved hypothetical protein.
Os07g0280600	3.34229	1.81822e-06	0.000169337	down	Hypothetical protein.
Os09g0423200	2.67063	5.39061e-09	2.32392e-06	down	Protein kinasecatalytic domain domain containing protein.
Os12g0263200	2.08619	1.31605e-09	7.87586e-07	down	Pinoresinol-lariciresinol reductase TH2.
Os06g0305200	2.76898	1.3351e-06	0.000132845	down	NUP155 (Nucleoporin 155).
Os09g0564200	2.49567	5.20975e-07	6.50392e-05	down	Hypothetical conserved gene.
Os01g0775300	2.11159	1.49161e-06	0.00014492	down	MATH domain containing protein.
Os04g0234600	2.23162	4.70023e-07	6.02936e-05	down	Sedoheptulose-1%2C7-bisphosphatase.
Os07g0153150	24.7027	8.79136e-07	9.63016e-05	down	Conserved hypothetical protein.
Os01g0393300	2.61602	8.56806e-06	0.000592031	down	H0306B06.1 protein.
Os05g0268500	8.64286	6.77818e-06	0.000488287	down	Serine carboxypeptidase 2.
Os06g0611900	4.01348	3.16551e-08	8.90644e-06	down	Victorin binding protein.
Os07g0147500	3.47675	6.76914e-13	2.05018e-08	down	Photosystem II 10 kDa polypeptidechloroplast precursor.
Os10g0507000	13.6639	1.39857e-08	4.82946e-06	down	Conserved hypothetical protein.
Os03g0597200	3.08574	1.12426e-07	2.14076e-05	down	Pentatricopeptide repeat proteinChloroplast development
Os01g0772700	3.97537	9.07005e-07	9.84701e-05	down	Armadillo-type fold domain containing protein.
Os05g0187100	8.17935	2.56871e-07	3.87242e-05	down	Cytosolic hexokinaseSugar signaling and metabolism
Os11g0700500	2.49412	1.01738e-08	3.78752e-06	down	Snapdragon myb protein 305 homolog.
Os07g0688100	2.9724	5.47941e-07	6.73315e-05	down	Pentatricopeptide repeat domain containing protein.
Os04g0517500	12.3786	1.32278e-07	2.40714e-05	down	Phosphoenolpyruvate carboxylase kinase.
Os12g0126800	2.0631	2.11501e-06	0.000190458	down	Protein of unknown function DUF618 domain containing protein.
Os02g0753000	2.58606	3.94845e-10	3.137e-07	down	Trehalose-6-phosphate phosphatase.
Os04g0356600	2.88004	4.91355e-07	6.22697e-05	down	OSIGBa0105P02.3 protein.
Os09g0447500	26.2439	7.31027e-08	1.58215e-05	down	Cytochrome P450 family protein.
Os03g0592500	2.078	8.58636e-07	9.45053e-05	down	Chloroplast chlorophyll a-b binding protein (Fragment).
Os04g0118800	71.4	1.14632e-06	0.000118054	down	NB-ARC domain containing protein.
Os04g0623550	3.32879	8.10957e-06	0.000566486	down	Hypothetical gene.
Os02g0753000	2.22455	6.09116e-12	3.93313e-08	down	Trehalose-6-phosphate phosphatase.
Os02g0132950	3.03054	1.41505e-07	2.53172e-05	down	Hypothetical gene.
Os09g0262000	55.7	6.82562e-06	0.00049089	down	Cinnamoyl CoA reductase.
Os07g0158200	7.04013	5.34476e-09	2.30895e-06	down	DeoxyribonucleaseTatD Mg-dependent domain containing protein.
Os08g0313200	2.43948	6.264e-08	1.41725e-05	down	(clone pCDH1) carbon monoxide dehydrogenase (cdhA).
Os04g0603000	2.9005	1.19195e-06	0.000121756	down	OSIGBa0118P15.1 protein.
Os06g0314501	2.09156	2.94455e-07	4.27732e-05	down	Conserved hypothetical protein.
Os03g0332566	2.7016	2.10984e-07	3.35893e-05	down	Hypothetical gene.
Os09g0424701	8.90426	2.84253e-08	8.18086e-06	down	Conserved hypothetical protein.
Os06g0622000	78.4	6.97709e-07	8.05557e-05	down	Zinc fingerCW-type domain containing protein.
Os11g0592700	3.22108	9.38692e-06	0.000637565	down	GTP1/OBG domain containing protein.
Os06g0693100	5.09899	4.16118e-08	1.07522e-05	down	NB-ARC domain containing protein.
Os04g0489100	3.11012	7.85861e-06	0.00055193	down	Lipaseclass 3 family protein.
Os09g0321200	13.5208	1.02402e-08	3.80542e-06	down	carotenoid cleavage dioxygenase.
Os03g0793000	2.26607	6.50338e-11	1.26033e-07	down	Zinc fingerAN1-type domain containing protein.
Os02g0754500	3.9797	4.36382e-07	5.68758e-05	down	Tetratricopeptide-like helical domain containing protein.
Os07g0484800	4.08235	8.81511e-08	1.80179e-05	down	Adenine phosphoribosyltransferase (EC 2.4.2.7)-like protein.
Os06g0125500	2.87392	2.05902e-08	6.42111e-06	down	Glutathione transporterTransport of glutathione derivatives
Os03g0136700	2.24905	5.94278e-06	0.000438855	down	pentatricopeptide (PPR) repeat-containing protein.
Os05g0232200	2.65935	2.20086e-07	3.46921e-05	down	Conserved hypothetical protein.
Os06g0669800	4.377	1.17103e-07	2.2035e-05	down	Ovarian tumourotubain domain containing protein.
Os04g0452100	2.48022	6.18355e-09	2.60087e-06	down	Cryptochrome 1bblue light photoreceptorRegulation of blue light-mediated de-etiolationBlue light-dependent inhibition of coleoptile and leaf elongation
Os09g0130800	2.18577	1.79897e-07	2.99382e-05	down	predicted protein.
Os12g0477700	3.3417	3.77537e-07	5.12722e-05	down	Conserved hypothetical protein.
Os11g0544000	2.09201	1.76044e-09	9.89288e-07	down	Conserved hypothetical protein.
Os10g0476200	2.27452	1.09455e-07	2.09767e-05	down	Hypothetical gene.
Os01g0912700	2.31586	1.72855e-08	5.56143e-06	down	T23K8.14 protein.
Os07g0601900	7.68786	7.46799e-06	0.000528523	down	NADPH HC toxin reductase (Fragment).
Os02g0246900	4.29651	1.05047e-07	2.04149e-05	down	Conserved hypothetical protein.
Os12g0109150	14.9916	1.41355e-08	4.86683e-06	down	Sodium/hydrogen exchanger family protein.
Os05g0379500	2.84124	6.23325e-07	7.40708e-05	down	Conserved hypothetical protein.
Os08g0292000	2.63357	9.96783e-06	0.000670107	down	Hypothetical conserved gene.
Os06g0187950	2.30396	8.63778e-06	0.000595955	down	Hypothetical protein.
Os08g0382400	3.16869	7.07162e-08	1.55255e-05	down	Peptidyl-prolyl cis-trans isomerase (Fragment).
Os02g0177900	2.64456	1.50073e-12	2.21275e-08	down	Carbohydrate kinaseFGGY family protein.
Os08g0543500	2.01495	1.60593e-10	1.94742e-07	down	NBS-LRR type resistance protein (Fragment).
Os10g0131000	2.27534	7.98817e-10	5.37558e-07	down	NB-ARC domain containing proteinexpressed.
Os03g0118600	2.84709	1.98166e-07	3.19906e-05	down	dihydrodipicolinate reductase.
Os12g0101000	2.06756	4.2569e-07	5.58682e-05	down	CCT motif family protein.
Os07g0578800	6.53333	5.68036e-08	1.32664e-05	down	Pentatricopeptide repeat domain containing protein.
Os01g0103700	12.4835	7.61707e-07	8.59117e-05	down	Conserved hypothetical protein.
Os04g0445000	2.33707	1.79929e-10	2.0434e-07	down	Potassium channel SKOR (Stelar K(+) outward rectifying channel).
Os08g0483200	2.42368	5.32405e-07	6.59698e-05	down	Nucleotide-bindingalpha-beta plait domain containing protein.
Os11g0182900	2.45995	4.73912e-07	6.06986e-05	down	Ankyrin repeat domain containing protein.
Os06g0152800	3.29856	5.06038e-08	1.22872e-05	down	Conserved hypothetical protein.
Os06g0693100	3.66916	1.97163e-06	0.000180583	down	NB-ARC domain containing protein.
Os05g0428100	3.73917	9.5165e-08	1.90662e-05	down	Beta-galactosidase.
Os02g0225000	7	6.46233e-07	7.61818e-05	down	cDNA clone:001-044-E12full insert sequence.
Os02g0574000	4.67582	7.15157e-08	1.55866e-05	down	Monosaccharide transporter 1.
Os12g0511500	2.37894	2.66603e-08	7.80286e-06	down	Disease resistance protein domain containing protein.
Os08g0203700	2.01811	2.80833e-08	8.09929e-06	down	SHR5-receptor-like kinase (Fragment).
Os01g0218800	4.88556	1.63635e-09	9.36045e-07	down	SET domain protein.
Os05g0290400	3.66067	1.78412e-06	0.000166911	down	Hypothetical gene.
Os10g0341101	3.6828	8.19395e-06	0.000571129	down	Conserved hypothetical protein.
Os09g0497100	2.60965	2.29816e-07	3.56973e-05	down	Pumilio RBD (Fragment).
Os02g0470000	2.74816	8.16164e-07	9.08676e-05	down	Pentatricopeptide repeat domain containing protein.
Os11g0109500	2.07425	3.40992e-07	4.7376e-05	down	Staphylococcal nuclease (SNase-like)OB-fold domain containing protein.
Os06g0704700	2.03309	2.21451e-06	0.00019721	down	NAD(P)-binding domain containing protein.
Os05g0468550	2.44786	9.20054e-08	1.86009e-05	down	Hypothetical gene.
Os07g0158900	3.44243	7.13233e-08	1.55866e-05	down	Hypothetical conserved gene.
Os06g0723900	2.52955	8.28976e-08	1.72117e-05	down	Hypothetical conserved gene.
Os08g0310300	77.3	9.05073e-07	9.83634e-05	down	Hypothetical gene.
Os06g0662200	3.18159	1.69027e-07	2.87057e-05	down	Basic leucine zipper (bZIP) transcription factorNegative regulator of cold and drought stress response
Os01g0141000	2.30112	9.57994e-06	0.000647916	down	AP2/ERF and B3 domain-containing proteinSalt stress response
Os11g0118300	2.50779	7.67298e-06	0.000540816	down	RPT2-like protein.
Os10g0540100	2.26181	3.28775e-07	4.61434e-05	down	Pentatricopeptide repeat domain containing protein.
Os01g0511000	2.26823	2.25438e-06	0.000199775	down	LOB domain protein 40.
Os07g0100800	4.56192	1.5299e-07	2.67217e-05	down	Amino acid permease.
Os07g0232900	2.74952	1.71085e-06	0.000161403	down	Heavy metal-transporting P1B-ATPaseRoot-to-shoot cadmium (Cd) translocation
Os03g0432200	12.6406	2.92952e-06	0.000247201	down	predicted protein.
Os06g0723650	4.71619	4.57812e-06	0.000353962	down	Conserved hypothetical protein.
Os01g0870100	2.01076	6.4173e-06	0.000467808	down	Ion channel POLLUX.
Os05g0215600	3.88732	4.03551e-07	5.37277e-05	down	Protein of unknown function DUF2358 domain containing protein.
Os04g0557000	2.49057	1.49735e-08	5.06766e-06	down	Genetic modifier.
Os09g0339000	151.8	9.85138e-10	6.30493e-07	down	Protein kinasecore domain containing protein.
Os10g0512500	2.13889	3.10634e-07	4.42705e-05	down	Crs1/yhby domain containing protein (Fragment).
Os02g0798501	4.72639	5.62592e-08	1.32118e-05	down	Uncharacterized protein OsI_009113.
Os09g0530275	4.58718	1.54626e-10	1.91201e-07	down	Cytochrome P450 domain containing protein.
Os03g0130100	4.73105	1.51754e-07	2.66227e-05	down	Acyl-activating enzyme 11.
Os12g0263200	2.69277	4.92165e-06	0.000375275	down	Pinoresinol-lariciresinol reductase TH2.
Os12g0481100	20.7297	9.84688e-06	0.000662727	down	cDNA clone:J033010C22full insert sequence.
Os07g0232900	2.32784	1.8707e-09	1.03858e-06	down	Heavy metal-transporting P1B-ATPaseRoot-to-shoot cadmium (Cd) translocation
Os01g0919800	2.5858	2.5111e-12	2.77563e-08	down	Efflux carrier of polar auxin transport.
Os02g0326700	4.16138	2.29304e-10	2.26964e-07	down	Peptidase S54rhomboid domain containing protein.
Os02g0665000	6.8371	4.5673e-07	5.8881e-05	down	NADP-malic enzyme.
Os07g0147500	3.12482	1.92667e-07	3.13839e-05	down	Photosystem II 10 kDa polypeptidechloroplast precursor.
Os04g0191500	2.59669	4.58949e-09	2.06663e-06	down	Conserved hypothetical protein.
Os02g0140200	9.51656	2.1574e-09	1.15747e-06	down	cycloartenol synthase.
Os01g0343500	2.41035	1.15869e-06	0.000119091	down	TPR repeat.
Os11g0618600	2.19993	6.39577e-06	0.000466738	down	Tyrosine protein kinase domain containing protein.
Os03g0143100	9.04192	7.17016e-08	1.56096e-05	down	SDD1 (STOMATAL DENSITY AND DISTRIBUTION) subtilase.
Os02g0176700	2.20833	9.62828e-10	6.18122e-07	down	autoinhibited calcium ATPase.
Os01g0762300	2.80944	3.54156e-08	9.60606e-06	down	predicted protein.
Os01g0851000	2.64779	2.7132e-12	2.77563e-08	down	Carbohydrate/purine kinase domain containing protein.
Os01g0893400	2.37531	2.34622e-10	2.28961e-07	down	Zinc fingerTAZ-type domain containing protein.
Os04g0523100	2.32661	3.63296e-10	2.95636e-07	down	OSIGBa0153E02-OSIGBa0093I20.5 protein.
Os03g0374901	2.50127	4.62584e-06	0.000356986	down	Hypothetical protein.
Os03g0145900	3.02543	1.7431e-12	2.28573e-08	down	CHY zinc finger family proteinexpressed.
Os02g0817900	3.8746	2.70958e-08	7.88123e-06	down	Cytochrome P450 family protein.
Os03g0306700	2.21043	5.42401e-07	6.6889e-05	down	Conserved hypothetical protein.
Os08g0204632	96	4.42553e-08	1.11857e-05	down	Conserved hypothetical protein.
Os03g0681000	4.93612	3.22746e-07	4.55428e-05	down	Protein of unknown function DUF819 domain containing protein.
Os09g0268300	6.18346	4.65833e-08	1.15892e-05	down	Monosaccharide transporter.
Os06g0654000	2.67574	2.92299e-07	4.25494e-05	down	Peptidase C19ubiquitin carboxyl-terminal hydrolase 2 family protein.
Os11g0310800	2.48772	6.04366e-06	0.000445024	down	DEAD-like helicaseN-terminal domain containing protein.
Os09g0272900	2.10333	5.40167e-07	6.66725e-05	down	Hypothetical conserved gene.
Os12g0142600	63.9	8.15466e-06	0.000568869	down	DTW domain containing protein.
Os06g0606250	74	1.63368e-06	0.000155501	down	Conserved hypothetical protein.
Os04g0683900	2.41648	6.65789e-07	7.77141e-05	down	Protein of unknown function DUF296 domain containing protein.
Os03g0318600	2.31456	9.16172e-06	0.00062493	down	Transcription factor HBP-1b(C38) (Fragment).
Os11g0592700	5.47115	6.54031e-06	0.000474885	down	GTP1/OBG domain containing protein.
Os02g0190200	3.09014	1.165e-07	2.19507e-05	down	Hypothetical protein.
Os02g0147700	2.81271	1.12326e-08	4.08276e-06	down	Hypothetical conserved gene.
Os03g0227601	3.02454	1.05921e-07	2.05366e-05	down	Hypothetical gene.
Os01g0661700	18.8108	3.5197e-06	0.000286835	down	Hypothetical gene.
Os02g0659600	79	7.17544e-07	8.21179e-05	down	Hypothetical conserved gene.
Os04g0683900	2.32087	7.13033e-09	2.89345e-06	down	Protein of unknown function DUF296 domain containing protein.
Os11g0552100	2.28558	2.64876e-06	0.000227763	down	Agenet domain containing protein.
Os04g0608600	2.04378	5.6382e-06	0.000420102	down	Alkyl hydroperoxide reductase subunit C/ Thiol specific antioxidant domain containing protein.
Os03g0649000	2.6468	5.22556e-07	6.51722e-05	down	Conserved hypothetical protein.
Os06g0486900	5.11015	3.57566e-07	4.9103e-05	down	Formate dehydrogenasemitochondrial precursor (EC 1.2.1.2) (NAD- dependent formate dehydrogenase) (FDH).
Os01g0674700	2.06551	5.27341e-07	6.55577e-05	down	EMB2279 (EMBRYO DEFECTIVE 2279).
Os09g0398300	6.25969	3.22145e-07	4.55e-05	down	Hypothetical protein.
Os07g0561800	66.8	4.7629e-06	0.000365523	down	carbohydrate transporter/ sugar porter.
Os12g0189700	2.67983	1.41819e-08	4.86883e-06	down	Twin arginine translocation signalTat domain containing protein.
Os03g0440200	6.49785	5.58764e-06	0.00041671	down	OSIGBa0076I14.10 protein.
Os01g0173600	14.7544	1.46635e-07	2.60106e-05	down	Glyoxalase/bleomycin resistance protein/dioxygenase domain containing protein.
Os01g0110100	2.18565	6.64684e-07	7.77066e-05	down	Phosphate (Pi) transporterPi homeostasis
Os11g0476333	3.88431	9.85259e-07	0.000104987	down	Hypothetical gene.
Os12g0611200	4.2176	6.38129e-06	0.000466009	down	RNA helicase.
Os03g0107300	2.10306	1.41749e-09	8.35037e-07	down	Anion transporterSilicon efflux transporterArsenic species (As) uptake
Os09g0259200	4.20031	6.73862e-08	1.49829e-05	down	seven-transmembrane-domain protein 1.
Os05g0217900	4.31132	9.03802e-06	0.000617406	down	Hypothetical conserved gene.
Os03g0582000	2.26866	1.53608e-07	2.67329e-05	down	Glutamate formiminotransferase.
Os11g0531300	2.03077	1.61094e-07	2.76988e-05	down	Universal minicircle sequence binding protein.
Os03g0293900	2.1436	1.74357e-07	2.92691e-05	down	Rubisco large subunit-binding protein subunit alpha (Fragment).
Os07g0148900	2.0496	2.37983e-09	1.24897e-06	down	Photosystem I protein-like protein.
Os11g0219000	2.2998	2.58539e-07	3.88477e-05	down	Peptidase S16lon N-terminal domain containing protein.
Os03g0225700	2.9392	3.03263e-09	1.50803e-06	down	Wall-associated kinaseBiotic stress response
Os01g0813800	3.8254	2.27502e-06	0.000200874	down	cDNAclone: J065127F19full insert sequence.
Os06g0367100	3.40299	9.00698e-06	0.000615692	down	starch branching enzyme III.
Os03g0620400	5.61961	3.97632e-08	1.03911e-05	down	Hypothetical conserved gene.
Os01g0342750	2.54807	6.54784e-06	0.000475327	down	Hypothetical conserved gene.
Os07g0523400	10.5859	3.31602e-06	0.000273569	down	Glucose-6-phosphate/phosphate-translocator precursor.
Os06g0367500	2.08771	4.06989e-06	0.000322668	down	B-cell receptor-associated protein 31-like containing protein.
Os12g0570400	2.29795	1.00372e-06	0.000106517	down	Conserved hypothetical protein.
Os03g0603200	4.76216	6.4557e-12	3.93313e-08	down	Hypothetical protein.
Os01g0523401	2.86376	2.91574e-06	0.000246429	down	ribosomal protein S18.
Os02g0116300	112.1	5.6497e-09	2.42302e-06	down	Yellow stripe-like transporter 17.
Os11g0123500	3.26782	7.90496e-06	0.000554621	down	Snf7 family protein.
Os09g0287000	8.03681	1.06121e-06	0.000111505	down	Ethylene-responsive transcription factor 5 (Ethylene-responsive element binding factor 5) (EREBP-5) (AtERF5).
Os03g0774300	7.78992	9.80802e-06	0.000660756	down	cDNA clone:J013088P07full insert sequence.
Os11g0529900	11.2836	3.26358e-08	9.08987e-06	down	Chalcone/stilbene synthaseN-terminal domain containing protein.
Os11g0156600	2.17954	1.1975e-07	2.23908e-05	down	H0622F05.7 protein.
Os01g0775200	2.1629	4.30012e-08	1.09918e-05	down	Conserved hypothetical protein.
Os10g0462800	4.38584	1.49071e-08	5.05503e-06	down	Component of the plastid-encoded plastid RNA polymerase (PEP)peripheral subunit of PEP complexOsPAP1/OspTAC3Early chloroplast development
Os03g0137200	2.21898	1.77546e-06	0.00016625	down	Protein phosphatase 2C.
Os01g0781100	3.13307	5.57892e-09	2.39762e-06	down	NBS-LRR protein (Fragment).
Os11g0245800	2.68287	5.1896e-08	1.24686e-05	down	Rp1-like protein (Fragment).
Os02g0505700	23.4146	3.80089e-07	5.14128e-05	down	Hypothetical protein.
Os03g0603100	3.37914	1.92635e-07	3.13839e-05	down	Phytochrome P450.
Os10g0208900	6.26109	3.08659e-10	2.71779e-07	down	Hypothetical conserved gene.
Os06g0268050	20.3382	8.70539e-09	3.36983e-06	down	OSIGBa0139J17.1 protein.
Os05g0481100	2.10273	2.77063e-07	4.08331e-05	down	cDNA clone:J013021N20full insert sequence.
Os07g0459500	5.10499	1.27954e-09	7.73546e-07	down	F-box domainSkp2-like domain containing protein.
Os04g0340300	9.49171	1.47351e-08	5.01538e-06	down	Terpenoid synthase domain containing protein.
Os03g0161900	2.59279	6.75018e-08	1.49944e-05	down	Heat stress transcriptioon factorHigh-temperature stress tolerance
Os02g0255700	2.15085	2.78659e-06	0.000237576	down	Hypothetical conserved gene.
Os05g0215000	2.4403	1.2412e-11	5.19956e-08	down	BURP domain containing protein.
Os09g0507100	2.34183	3.57118e-07	4.90576e-05	down	Squamosa-promoter binding-like protein 11.
Os01g0306800	2.15291	1.24355e-10	1.74182e-07	down	Hypothetical conserved gene.
Os07g0484800	3.70506	5.87247e-09	2.4979e-06	down	Adenine phosphoribosyltransferase (EC 2.4.2.7)-like protein.
Os05g0104150	3.65911	3.9356e-07	5.27702e-05	down	Leucine-rich repeat (LRR) proteinInhibitor of fungal polygalacturonaseDefence response
Os10g0547500	2.34413	4.77547e-07	6.1038e-05	down	Divalent ion symporter domain containing protein.
Os06g0272850	3.77735	4.12722e-08	1.06945e-05	down	Domain of unknown function DUF231plant domain containing protein.
Os05g0380300	72.0698	2.62295e-09	1.33636e-06	down	NBS-LRR protein (Fragment).
Os01g0807000	11.2566	1.72685e-08	5.56028e-06	down	Conserved hypothetical protein.
Os09g0443400	3.75612	1.65752e-08	5.42321e-06	down	Hypothetical conserved gene.
Os03g0289400	2.09434	2.02696e-07	3.24816e-05	down	Rhodanese-like domain containing protein.
Os08g0548700	2.77818	1.1005e-07	2.1042e-05	down	Hypothetical conserved gene.
Os04g0518800	2.18968	8.77927e-09	3.38374e-06	down	Cytokinin synthesis enzymeCytokinin-activating enzymeRegulation of awn length and grain production
Os01g0681400	2.04989	9.90132e-06	0.000666067	down	ATG6/Beclin-1 proteinAbiotic stresses (heat%2Ccold and drought) and hormone (abscisic acid) response
Os03g0394900	4.40676	7.06776e-08	1.55252e-05	down	predicted protein.
Os01g0200350	2.72579	5.98357e-08	1.37106e-05	down	Hypothetical protein.
Os01g0723800	2.22117	1.99753e-07	3.21343e-05	down	Hypothetical conserved gene.
Os08g0508700	14.6094	4.28891e-06	0.00033605	down	EIL3.
Os11g0220300	5.06591	8.50764e-10	5.61833e-07	down	NB-ARC domain containing proteinexpressed.
Os08g0113000	2.03185	3.82683e-10	3.06385e-07	down	Peroxidase 47 precursor (EC 1.11.1.7) (Atperox P47) (ATP32).
Os01g0923600	2.17661	1.00033e-06	0.000106239	down	Hypothetical conserved gene.
Os08g0152366	2.78407	3.23665e-08	9.02109e-06	down	Hypothetical protein.
Os01g0929100	2.04586	1.56305e-06	0.000150542	down	predicted protein.
Os07g0606500	2.58881	1.08897e-06	0.000113759	down	ATP-dependent RNA helicaseeIF-4A family.
Os09g0559500	3.89681	3.96868e-08	1.03842e-05	down	Protein of unknown function DUF594 domain containing protein.
Os07g0540600	2.45371	1.60443e-08	5.30194e-06	down	Gnk2-homologous domain domain containing protein.
Os08g0213400	2.75592	2.26107e-10	2.25797e-07	down	cDNA clone:J013022L16full insert sequence.
Os03g0190400	2.04939	1.69912e-07	2.87661e-05	down	Hypothetical gene.
Os04g0562000	2.38426	2.38409e-06	0.000208991	down	H0211B05.5 protein.
Os01g0900400	3.08851	1.17862e-06	0.000120781	down	Putative triacylglycerol (TAG) lipasePhospholipase A1Specification of empty-glume identityRegulation of spikelet developmentEndogenous jasmonic acid (JA) biosynthesis
Os11g0550100	3.15886	1.00256e-07	1.97818e-05	down	NB-ARC domain containing proteinexpressed.
Os03g0640825	4.67138	1.7723e-06	0.000166081	down	Hypothetical protein.
Os12g0215100	5.92033	1.63499e-09	9.36045e-07	down	Hypothetical conserved gene.
Os09g0481800	3.0356	1.04769e-06	0.000110336	down	Nitrogen-fixing NifUC-terminal domain containing protein.
Os08g0289400	2.17275	2.51924e-07	3.82146e-05	down	SNF2-related domain containing protein.
Os01g0347200	2.90288	5.50239e-11	1.16994e-07	down	Conserved hypothetical protein.
Os02g0104700	4.10635	9.56933e-09	3.59151e-06	down	Nitric oxide associated 1.
Os04g0549600	2.05924	5.5802e-06	0.000416379	down	OSIGBa0134H18.3 protein.
Os03g0805600	2.45616	7.12672e-07	8.1805e-05	down	pheophorbide a oxygenase.
Os02g0764400	63.5	5.45728e-06	0.000408944	down	Galactoside 2-alpha-L-fucosyltransferase (EC 2.4.1.69) (Xyloglucan alpha-(1%2C2)-fucosyltransferase) (PsFT1).
Os02g0771400	2.48254	1.96964e-07	3.18472e-05	down	Protein-tyrosine phosphataseSIW14-like domain containing protein.
Os07g0119000	2.16487	9.86037e-07	0.000104989	down	MAP3K gamma protein kinase (Fragment).
Os04g0548100	27.6757	1.71291e-07	2.88878e-05	down	OSIGBa0106P14.3 protein.
Os11g0568700	2.13556	2.33907e-08	7.06579e-06	down	START-like domain domain containing protein.
Os04g0556000	2.64716	2.63099e-08	7.72756e-06	down	heavy metal ATPase.
Os01g0669100	4.11181	4.58882e-06	0.000354657	down	Resistance protein candidate (Fragment).
Os06g0707733	2.57601	3.44088e-08	9.42543e-06	down	Disease resistance protein domain containing protein.
Os09g0522200	3.00377	3.3501e-06	0.000276051	down	DRE-binding protein 1A.
Os04g0616700	2.04175	2.31897e-08	7.03018e-06	down	H0525G02.12 protein.
Os04g0463800	15.7714	1.62077e-07	2.78216e-05	down	Pentatricopeptide repeat domain containing protein.
Os05g0428100	3.18348	6.64795e-08	1.48323e-05	down	Beta-galactosidase.
Os10g0162844	6.11527	1.92113e-08	6.08697e-06	down	Wall-associated kinase domain containing protein.
Os12g0105800	2.72878	4.31396e-06	0.000337794	down	Tyrosine protein kinase domain containing protein.
Os05g0261700	2.7731	5.69076e-08	1.32664e-05	down	Leucine-rich repeatplant specific containing protein.
Os06g0267900	3.29001	8.09304e-08	1.69001e-05	down	NB-ARC domain containing protein.
Os12g0541500	2.80307	1.14248e-06	0.000117776	down	Elongation factor Ts.
Os07g0164200	2.09304	4.05703e-09	1.89476e-06	down	cDNA clone:001-026-G04full insert sequence.
Os04g0688600	11.089	5.85132e-09	2.49379e-06	down	Peroxidase (EC 1.11.1.7).
Os05g0468550	3.74061	2.40893e-06	0.000210546	down	Hypothetical gene.
Os04g0617700	2.17102	1.11463e-09	6.90973e-07	down	H0313F03.6 protein.
Os08g0533900	5.16173	3.35061e-07	4.68028e-05	down	Hypothetical conserved gene.
Os01g0813800	6.72155	3.70157e-09	1.76046e-06	down	cDNAclone: J065127F19full insert sequence.
Os03g0598900	4.73538	8.43725e-08	1.74346e-05	down	predicted protein.
Os01g0798900	2.24463	9.57471e-06	0.00064783	down	disease resistance protein RGA4.
Os04g0640500	4.35	1.48925e-08	5.05421e-06	down	ABC-1 domain containing protein.
Os01g0127200	2.29596	1.03224e-06	0.00010904	down	Multicopper oxidaseMaintenance of Pi homeostasis
Os03g0269100	2.40383	2.86791e-06	0.000243278	down	tropinone reductase.
Os02g0735800	3.39442	3.21247e-09	1.57294e-06	down	Pentatricopeptide repeat domain containing protein.
Os09g0268600	10.7938	2.05099e-07	3.2816e-05	down	Zinc fingerSWIM-type domain containing protein.
Os06g0329900	3.67903	1.08224e-07	2.08268e-05	down	SAM dependent carboxyl methyltransferase family protein.
Os01g0127300	2.44435	8.17929e-06	0.000570299	down	SufBD family protein.
Os04g0419700	5.41993	4.24238e-06	0.000333348	down	H0525E10.7 protein.
Os03g0786250	2.19577	4.15458e-08	1.07486e-05	down	Hypothetical gene.
Os08g0536300	2.11118	8.00608e-08	1.67963e-05	down	Hd1.
Os06g0693100	3.7785	1.48971e-07	2.63124e-05	down	NB-ARC domain containing protein.
Os05g0387200	3.32267	7.69508e-06	0.000542281	down	UDP-sulfoquinovose synthase.
Os02g0112100	2.39337	8.85494e-10	5.78323e-07	down	High-affinity nitrate transporterNitrate uptakeNitrate transport
Os11g0689500	5.09068	3.92691e-08	1.03075e-05	down	Conserved hypothetical protein.
Os05g0380300	78.5746	3.11146e-09	1.53823e-06	down	NBS-LRR protein (Fragment).
Os04g0678700	3.84951	4.91066e-07	6.22697e-05	down	Protochlorophyllide reductase (EC 1.3.1.33) (PCR) (NADPH- protochlorophyllide oxidoreductase) (POR) (Fragment).
Os09g0311600	2.63443	8.4372e-07	9.32348e-05	down	NBS-LRR type resistance protein (Fragment).
Os10g0100700	2.98541	5.40503e-08	1.28458e-05	down	Vitamin B6 biosynthesis protein family protein.
Os03g0190300	3.19545	3.9866e-07	5.32438e-05	down	protein binding protein.
Os01g0719400	2.32653	2.73348e-07	4.0487e-05	down	CASC3/Barentsz eIF4AIII binding domain containing protein.
Os02g0140200	2.41415	2.02224e-11	6.70934e-08	down	cycloartenol synthase.
Os08g0196200	3.54433	9.38126e-08	1.89049e-05	down	Hypothetical conserved gene.
Os03g0602600	9.21774	3.43582e-06	0.00028172	down	predicted protein.
Os06g0120732	5.30073	5.09315e-07	6.38334e-05	down	ATP synthase subunit beta (Fragment).
Os07g0448200	2.70255	1.10088e-06	0.000114685	down	cDNA clone:J023132K03full insert sequence.
Os08g0242800	2.2543	1.90429e-09	1.0516e-06	down	Sigma factor SIG6.
Os01g0894100	5.80602	8.27449e-07	9.17795e-05	down	Transposase (Fragment).
Os03g0160000	8.34682	4.21688e-08	1.08226e-05	down	Conserved hypothetical protein.
Os08g0290100	3.71078	8.34774e-06	0.000580199	down	Pentatricopeptide repeat containing protein.
Os11g0147800	2.25759	1.18436e-08	4.26744e-06	down	Wali7 protein (Fragment).
Os07g0147500	10.2816	7.8948e-09	3.15733e-06	down	Photosystem II 10 kDa polypeptidechloroplast precursor.
Os03g0325500	2.0683	2.17925e-07	3.4443e-05	down	Hypothetical conserved gene.
Os01g0795100	143.5	2.71878e-09	1.3801e-06	down	Subtilase.
Os07g0115300	2.00736	7.31048e-08	1.58215e-05	down	Peroxidase2 precursor (EC 1.11.1.7).
Os10g0130900	2.14752	4.77263e-08	1.17887e-05	down	Hypothetical protein.
Os03g0143100	16.036	1.66927e-08	5.4297e-06	down	SDD1 (STOMATAL DENSITY AND DISTRIBUTION) subtilase.
Os03g0719700	2.2209	4.46234e-07	5.78504e-05	down	Phytochrome A.
Os05g0241150	5.08117	2.85417e-06	0.000242294	down	Hypothetical protein.
Os02g0298100	2.11055	2.65987e-07	3.97088e-05	down	Hypothetical protein.
Os11g0673600	2.57683	2.37071e-12	2.77563e-08	down	NB-ARC domain containing proteinexpressed.
Os08g0177300	3.64067	7.58307e-12	4.24983e-08	down	DNA binding protein (Fragment).
Os05g0166300	12.8026	1.85068e-06	0.000171704	down	Serine/threonine protein kinase-related domain containing protein.
Os08g0112900	2.21298	1.23774e-06	0.000125261	down	LipaseGDSL domain containing protein.
Os06g0531600	6.3516	2.84621e-06	0.000241967	down	Esterase.
Os02g0514500	2.06198	5.97552e-11	1.19719e-07	down	Glycerophosphoryl diester phosphodisterase (Fragment).
Os02g0199200	2.17731	2.81992e-07	4.14123e-05	down	Disease resistance protein domain containing protein.
Os11g0245200	2.34576	1.14713e-09	7.04595e-07	down	leucine-rich repeat family protein / protein kinase family protein.
Os06g0137600	3.88086	9.04742e-06	0.000617845	down	K homology-likealpha/beta domain containing protein.
Os07g0651600	7.6383	4.21917e-07	5.55311e-05	down	Armadillo-like helical domain containing protein.
Os01g0310500	2.04348	9.20629e-06	0.000627145	down	Conserved hypothetical protein.
Os02g0580900	2.72644	6.37573e-09	2.66549e-06	down	peptide transporter PTR2.
Os12g0100200	3.72989	6.10147e-07	7.28808e-05	down	Conserved hypothetical protein.
Os05g0417200	2.63013	2.26523e-06	0.000200521	down	Thioredoxin-like fold domain containing protein.
Os02g0675800	4.29342	1.69212e-10	2.01078e-07	down	Cyclin-like F-box domain containing protein.
Os01g0893400	56	6.82565e-06	0.00049089	down	Zinc fingerTAZ-type domain containing protein.
Os02g0798400	3.76889	4.09635e-07	5.43459e-05	down	Uncharacterized protein OsI_009113.
Os06g0200700	4.78039	6.50778e-06	0.000473163	down	Hypothetical protein.
Os06g0158300	2.51309	3.15054e-09	1.54994e-06	down	NB-ARC domain containing protein.
Os02g0151800	2.37062	4.21001e-08	1.08226e-05	down	Ca2+/calmodulin-dependent protein kinase phosphatase.
Os05g0469800	2.11181	5.49353e-08	1.29669e-05	down	Pyruvate decarboxylase (EC 4.1.1.1) (Fragment).
Os09g0272900	2.65072	6.81388e-08	1.50874e-05	down	Hypothetical conserved gene.
Os01g0723800	2.95388	2.9848e-08	8.51937e-06	down	Hypothetical conserved gene.
Os05g0485300	2.05496	1.20118e-06	0.000122462	down	TRAMLAG1 and CLN8 homology domain containing protein.
Os05g0428100	3.30108	1.02369e-07	2.00636e-05	down	Beta-galactosidase.
Os04g0316200	4.32513	5.94205e-08	1.36574e-05	down	Protein of unknown function DUF26 domain containing protein.
Os03g0860900	6.52525	1.27854e-06	0.00012848	down	WD40 repeat-like domain containing protein.
Os01g0761000	3.23099	1.41707e-08	4.86883e-06	down	Conserved hypothetical protein.
Os03g0852000	2.11757	3.36401e-10	2.82416e-07	down	Hydroxyproline-rich glycoprotein.
Os10g0130900	2.68091	8.04712e-08	1.68382e-05	down	Hypothetical protein.
Os10g0378100	2.46029	2.74548e-08	7.94567e-06	down	Cytochrome P450 family proteinexpressed.
Os10g0461100	4.13038	2.30679e-07	3.58173e-05	down	PsbP family proteinexpressed.
Os04g0295500	28.8049	1.81651e-08	5.79945e-06	down	Conserved hypothetical protein.
Os11g0193300	5.43837	7.56798e-07	8.54743e-05	down	Hypothetical conserved gene.
Os03g0233300	23.5946	8.71521e-08	1.78754e-05	down	LysM receptor-like kinaseArbuscular mycorrhizal (AM) symbiosis
Os09g0511300	3.13094	7.81907e-08	1.65785e-05	down	Conserved hypothetical protein.
Os03g0425000	4.62093	5.19522e-08	1.24686e-05	down	predicted protein.
Os12g0172400	4.41795	1.78424e-07	2.97773e-05	down	Hypothetical conserved gene.
Os07g0565000	9.77273	8.22365e-08	1.71341e-05	down	40S ribosomal protein S11.
Os07g0689950	2.16639	8.49311e-07	9.37277e-05	down	BRCT domain containing protein.
Os02g0182700	2.01763	2.84333e-06	0.000241836	down	Conserved hypothetical protein.
Os03g0145900	2.3625	1.19455e-07	2.23559e-05	down	CHY zinc finger family proteinexpressed.
Os05g0313900	3.27383	4.22878e-06	0.000332532	down	DNA cytosine methyltransferase Zmet3.
Os11g0678000	2.09708	1.40894e-07	2.52633e-05	down	PAS domain containing proteinexpressed.
Os05g0113000	3.41771	7.02665e-07	8.09926e-05	down	Amino acid binding protein.
Os02g0533200	5.55657	1.64465e-07	2.81096e-05	down	SOUL haem-binding protein domain containing protein.
Os05g0305100	2.66667	1.72102e-07	2.89518e-05	down	Transcription factor IIIB 90 kDa subunit (TFIIIB90) (hTFIIIB90) (B- related factor 1) (BRF-1) (hBRF) (TATA box-binding protein-associated factorRNA polymerase IIIsubunit 2) (TAF3B2). Splice isoform 2.
Os05g0428600	4.47013	5.04174e-06	0.000382463	down	HSP70 precursor.
Os08g0531200	2.52973	5.82269e-06	0.0004316	down	WD40 repeat domain containing protein.
Os01g0901600	4.62582	5.10908e-07	6.40136e-05	down	4-coumarate--CoA ligase-like 6.
Os01g0364800	16.2231	8.38441e-09	3.27729e-06	down	Protein kinasecatalytic domain domain containing protein.
Os08g0424600	2.20042	2.0571e-07	3.28884e-05	down	Hypothetical gene.
Os07g0530400	2.04839	1.43784e-10	1.85187e-07	down	Ribosomal protein S14conserved site domain containing protein.
Os12g0124100	2.41474	4.22755e-07	5.55886e-05	down	Conserved hypothetical protein.
Os06g0611900	3.62238	1.94456e-06	0.000178815	down	Victorin binding protein.
Os04g0549600	2.1676	2.34874e-06	0.000206416	down	OSIGBa0134H18.3 protein.
Os11g0194800	4.92912	3.80677e-08	1.00914e-05	down	DNA-directed RNA polymerase II 7.6 kDa polypeptide (EC 2.7.7.6) (RPB10) (RPB7.6).
Os01g0779100	7.02353	3.82958e-06	0.000307198	down	Peptidase M16zinc-binding site domain containing protein.
Os02g0504000	2.18563	1.17234e-08	4.23516e-06	down	Cytochrome P450 CYP81L6.
Os12g0434400	6.70701	3.2642e-06	0.000270053	down	predicted protein.
Os01g0144380	63.6	6.79449e-06	0.000489377	down	Hypothetical gene.
Os11g0100300	3.71964	5.64203e-07	6.8901e-05	down	Conserved hypothetical protein.
Os12g0117600	2.09291	7.28761e-07	8.31684e-05	down	BTB domain containing protein.
Os01g0651100	7.32864	3.55434e-07	4.891e-05	down	Pentatricopeptide repeat domain containing protein.
Os09g0511600	2.05255	2.43978e-06	0.000212659	down	Glycoside hydrolasefamily 1 protein.
Os01g0539400	9.00571	4.12354e-08	1.06945e-05	down	Hypothetical protein.
Os05g0367200	6.02103	6.54588e-12	3.93313e-08	down	Conserved hypothetical protein.
Os10g0461400	5.21889	2.54483e-07	3.84341e-05	down	PsbP family proteinexpressed.
Os11g0182900	2.49056	4.77312e-06	0.000365901	down	Ankyrin repeat domain containing protein.
Os01g0801901	2.45102	3.28219e-07	4.61065e-05	down	Transcription factor (Fragment).
Os01g0650200	2.81833	6.71843e-08	1.49479e-05	down	esterase.
Os05g0158200	3.68778	8.07971e-08	1.68808e-05	down	Peptidasetrypsin-like serine and cysteine domain containing protein.
Os05g0212400	7.9205	6.9362e-09	2.83409e-06	down	Uncharacterized plant-specific domain TIGR01589 family protein.
Os08g0543051	4.47714	2.22695e-07	3.49042e-05	down	Hypothetical gene.
Os02g0739000	3.26967	6.29631e-09	2.64027e-06	down	predicted protein.
Os10g0574150	2.07495	7.7024e-06	0.000542613	down	Hypothetical protein.
Os08g0509400	69.9	3.24338e-06	0.000268538	down	Non-protein coding transcript.
Os05g0166900	2.15584	1.10374e-08	4.03657e-06	down	S-domain receptor-like protein kinase.
Os08g0535700	9.75397	6.12725e-07	7.31255e-05	down	glycerophosphodiester phosphodiesterase.
Os10g0413101	5.69022	8.35456e-06	0.000580415	down	H0815C01.6 protein.
Os11g0191400	2.29311	6.68194e-07	7.79071e-05	down	predicted protein.
Os08g0233400	2.78851	1.72212e-07	2.89518e-05	down	Ankyrin repeat domain containing protein.
Os06g0272850	13.0186	8.00075e-09	3.18741e-06	down	Domain of unknown function DUF231plant domain containing protein.
Os01g0297700	10.3973	1.0077e-07	1.98441e-05	down	Protein of unknown function DUF6transmembrane domain containing protein.
Os07g0421932	3.16921	3.71458e-08	9.94528e-06	down	Hypothetical gene.
Os02g0681200	2.26854	3.16792e-06	0.000263764	down	Zinc fingerRING/FYVE/PHD-type domain containing protein.
Os09g0470900	3.05302	2.36688e-08	7.1389e-06	down	predicted protein.
Os09g0524001	4.59944	9.57905e-07	0.000102993	down	Hypothetical gene.
Os12g0637200	2.10561	4.35235e-08	1.10874e-05	down	Purple acid phosphatase.
Os02g0704966	2.13107	3.32664e-08	9.20983e-06	down	Hypothetical conserved gene.
Os02g0137700	2.91936	5.28757e-08	1.26683e-05	down	NAD(P)-binding domain containing protein.
Os01g0719600	2.206	2.48653e-07	3.78152e-05	down	Heavy metal transport/detoxification protein domain containing protein.
Os03g0332533	2.13114	1.0194e-06	0.000107987	down	Plant acid phosphatase family proteinexpressed.
Os01g0781200	2.32462	2.23126e-07	3.49191e-05	down	Rust resistance protein.
Os03g0448950	18.3784	4.14753e-06	0.000327633	down	Hypothetical gene.
Os04g0610500	2.32976	3.22836e-12	2.97527e-08	down	Peptidase M24Amethionine aminopeptidasesubfamily 1 protein.
Os01g0912850	6.78488	3.73626e-06	0.000300934	down	Conserved hypothetical protein.
Os07g0191500	3.73179	6.30475e-12	3.93313e-08	down	Pentatricopeptide repeat domain containing protein.
Os04g0549600	2.92423	2.36156e-08	7.12805e-06	down	OSIGBa0134H18.3 protein.
Os04g0322100	4.19969	2.73132e-08	7.91573e-06	down	Protein of unknown function DUF26 domain containing protein.
Os09g0554000	22.8649	3.14732e-07	4.4655e-05	down	Mitochondrial phosphate transporter.
Os08g0465700	3.10393	7.83122e-12	4.2884e-08	down	Cytochrome P450 family protein.
Os01g0603700	3.91321	2.09464e-07	3.34243e-05	down	Hypothetical gene.
Os10g0471350	3.31489	4.47126e-06	0.000347319	down	helicase domain-containing protein.
Os07g0107000	75.8	1.07356e-06	0.000112517	down	Hypothetical protein.
Os06g0250600	3.99259	8.78761e-09	3.38374e-06	down	Ankyrin domain containing protein.
Os04g0324100	2.00763	7.92862e-07	8.86541e-05	down	UDP-glucuronosyl/UDP-glucosyltransferase family protein.
Os01g0919800	2.82374	4.89936e-09	2.16849e-06	down	Efflux carrier of polar auxin transport.
Os11g0226700	2.0123	4.93241e-06	0.000375819	down	Hypothetical conserved gene.
Os02g0582900	4.23331	5.15224e-08	1.24302e-05	down	Conserved hypothetical protein.
Os02g0135900	10.8639	1.44768e-08	4.95369e-06	down	predicted protein.
Os05g0428100	7.83766	3.74326e-12	3.11832e-08	down	Beta-galactosidase.
Os01g0866100	2.04846	5.67085e-08	1.32608e-05	down	Actin 4.
Os03g0583900	2.41954	5.07428e-08	1.22975e-05	down	Endoribonuclease Dicer homolog 2a.
Os10g0391400	3.94683	8.1005e-08	1.69072e-05	down	Tify domain containing protein.
Os04g0684500	2.32223	7.84446e-06	0.00055131	down	Hypothetical conserved gene.
Os08g0452900	2.80363	6.68185e-07	7.79071e-05	down	Chaperone protein dnaJ.
Os08g0537600	2.19506	1.63562e-06	0.000155616	down	Arf GTPase activating protein family protein.
Os06g0125500	2.61208	1.77635e-11	6.24316e-08	down	Glutathione transporterTransport of glutathione derivatives
Os08g0202300	3.43608	1.03186e-09	6.51608e-07	down	SHR5-receptor-like kinase (Fragment).
Os12g0594950	2.55461	2.22071e-07	3.48592e-05	down	Hypothetical conserved gene.
Os11g0305300	2.22427	3.9545e-08	1.03537e-05	down	Hypothetical gene.
Os01g0549500	16.0694	8.2986e-08	1.72167e-05	down	Phox-like domain containing protein.
Os02g0514500	4.71441	6.61875e-09	2.73129e-06	down	Glycerophosphoryl diester phosphodisterase (Fragment).
Os02g0566300	3.85388	1.3396e-06	0.000133165	down	Peptidase asparticcatalytic domain containing protein.
Os06g0267400	76.8	6.41905e-08	1.44602e-05	down	Cytochrome P450.
Os08g0191900	2.24339	3.40486e-06	0.000279563	down	Pentatricopeptide repeat domain containing protein.
Os12g0576700	2.11977	1.31013e-09	7.85177e-07	down	Diphosphonucleotide phosphatase 1 precursor.
Os05g0512200	2.04369	1.68866e-08	5.47238e-06	down	T4P13.26 protein.
Os09g0279900	2.44313	2.75477e-07	4.06851e-05	down	Conserved hypothetical protein.
Os02g0132300	2.17379	1.22185e-07	2.27131e-05	down	Erythrocyte membrane protein PFEMP3 (Fragment).
Os07g0542600	2.07449	7.30005e-07	8.32874e-05	down	receptor-like protein kinase RK20-1.
Os06g0729300	2.26185	4.34215e-09	1.98543e-06	down	Protein argonaute 1D.
Os01g0230800	2.29726	9.25114e-06	0.000630097	down	Conserved hypothetical protein.
