# Supplementary material for: Global N6-Methyladenosine Profiling Revealed the Tissue-Specific Epitranscriptomic Regulation of Rice Responses to Salt Stress
Source: Int J Mol Sci. 2022 Feb 14;23(4):2091. doi: 10.3390/ijms23042091 (PMC8875919; doi:10.3390/ijms23042091)
Supplement: Supplementary file 1 [file ijms-23-02091-s001.zip › Table S5_List of the genes with up-regulated m6A methylation in shoots under salt stress.xlsx]

## Sheet: Table Sx
Table S5. List of the genes with up-regulated m6A methylation in shoots under salt stress
GeneName	Foldchange	P_value	FDR	Regulation	description
Os01g0104200	2.62199	2.12805e-07	1.97325e-05	up	No apical meristem (NAM) protein domain containing protein.
Os01g0110400	2.35451	8.96839e-06	0.000378342	up	Acetyl-CoA C-acetyltransferase.
Os01g0110400	2.03205	1.20997e-06	7.41077e-05	up	Acetyl-CoA C-acetyltransferase.
Os01g0114100	3.33582	1.28555e-07	1.34334e-05	up	Protein kinase RLK17.
Os01g0121900	7.3662	4.23076e-08	5.6659e-06	up	Seven-in-absentia protein sina domain containing protein.
Os01g0124000	2.58137	2.46709e-06	0.000130399	up	Bowman Birk trypsin inhibitor.
Os01g0124100	2.02906	9.42988e-06	0.00039466	up	Proteinase inhibitor I12 Bowman-Birk family protein.
Os01g0124401	6.01366	8.82239e-08	1.01469e-05	up	Bowman-Birk type bran trypsin inhibitor.
Os01g0126401	3.92918	7.80805e-06	0.0003369	up	Hypothetical gene.
Os01g0126600	3.11542	2.92445e-08	4.21988e-06	up	X1 (Fragment).
Os01g0127900	4.00356	1.11167e-07	1.20638e-05	up	Mannose-6-phosphate isomerase domain containing protein.
Os01g0128100	2.49508	1.33346e-06	7.99338e-05	up	Bifunctional nuclease (Fragment).
Os01g0128100	5.88294	8.93715e-07	5.85003e-05	up	Bifunctional nuclease (Fragment).
Os01g0128250	3.51023	4.63671e-06	0.000218035	up	Hypothetical gene.
Os01g0128250	3.79449	2.47897e-09	5.24525e-07	up	Hypothetical gene.
Os01g0128250	3.86168	5.48612e-08	6.97168e-06	up	Hypothetical gene.
Os01g0130000	3.2921	3.22384e-07	2.70117e-05	up	metal tolerance protein C3.
Os01g0130000	2.02475	2.05925e-06	0.000112747	up	metal tolerance protein C3.
Os01g0133600	2.96529	1.99971e-06	0.000110143	up	Hypothetical conserved gene.
Os01g0135700	7.31233	8.68235e-07	5.71741e-05	up	EF-HAND 2 domain containing protein.
Os01g0136200	3.05896	4.10173e-06	0.00019604	up	16.9 kDa class I heat shock protein 1.
Os01g0142600	5.14134	9.85268e-07	6.30962e-05	up	Conserved hypothetical protein.
Os01g0149700	7.98667	7.63218e-08	9.09217e-06	up	Hypothetical conserved gene.
Os01g0149900	2.47611	2.06707e-07	1.93342e-05	up	Conserved hypothetical protein.
Os01g0151600	2.74087	7.25868e-07	4.99414e-05	up	Conserved hypothetical protein.
Os01g0152800	4.29803	3.70869e-06	0.000180749	up	Protein kinase core domain containing protein.
Os01g0155800	6.70783	4.3276e-09	8.45502e-07	up	Conserved hypothetical protein.
Os01g0159000	7.36755	7.64183e-07	5.18352e-05	up	cDNA clone:J023049H2C full insert sequence.
Os01g0162500	12.8238	6.24972e-08	7.71931e-06	up	Leucine-rich repeat-containing N-terminal type 2 domain containing protein.
Os01g0162500	8.53964	9.52258e-08	1.07476e-05	up	Leucine-rich repeat-containing N-terminal type 2 domain containing protein.
Os01g0162900	22.3158	9.90171e-06	0.000410587	up	Hypothetical protein.
Os01g0165000	3.09888	5.89302e-07	4.27507e-05	up	DRE binding protein 2.
Os01g0165000	2.70844	8.38583e-07	5.5641e-05	up	DRE binding protein 2.
Os01g0165000	2.44208	4.88203e-07	3.69575e-05	up	DRE binding protein 2.
Os01g0165200	9.86275	9.96094e-06	0.0004128	up	KEAP1.
Os01g0165200	6.38372	2.41525e-07	2.16942e-05	up	KEAP1.
Os01g0165200	23.5429	4.80093e-09	9.25997e-07	up	KEAP1.
Os01g0165200	13.3	1.51194e-07	1.5238e-05	up	KEAP1.
Os01g0165200	2.89191	3.14984e-07	2.65441e-05	up	KEAP1.
Os01g0165200	19.5301	6.99318e-09	1.27662e-06	up	KEAP1.
Os01g0166100	2.08437	2.31179e-06	0.000123644	up	Ca(2+)-dependent nuclease.
Os01g0167900	2.15902	8.22189e-06	0.000352049	up	KIP1-like domain containing protein.
Os01g0170051	3.95644	6.23993e-06	0.000278907	up	Hypothetical protein.
Os01g0175100	2.50989	5.59146e-07	4.09779e-05	up	Kv1.4 voltage-gated K+ channel family protein.
Os01g0178900	2.97504	2.51361e-07	2.23909e-05	up	Symbiosis-related disease resistance protein (Fragment).
Os01g0182400	3.66213	2.29846e-07	2.09027e-05	up	Conserved hypothetical protein.
Os01g0183300	2.20829	1.14889e-06	7.11812e-05	up	Endonuclease/exonuclease/phosphatase domain containing protein.
Os01g0184100	3.54022	5.1007e-06	0.000235892	up	17.5 kDa class II heat shock protein.
Os01g0187600	17.1064	3.31323e-06	0.000164975	up	Cytokinin dehydrogenase 1.
Os01g0192300	2.35428	4.87541e-06	0.000227388	up	Hypothetical conserved gene.
Os01g0204000	3.23588	9.74714e-06	0.00040545	up	Hypothetical conserved gene.
Os01g0214500	3.90234	1.52695e-07	1.53517e-05	up	Conserved hypothetical protein.
Os01g0224400	2.27287	1.67638e-08	2.67253e-06	up	Mitochondrial carrier protein.
Os01g0225000	3.23252	1.79711e-06	0.00010101	up	Mitochondrial carrier protein domain containing protein.
Os01g0225000	5.30902	3.99725e-06	0.000192089	up	Mitochondrial carrier protein domain containing protein.
Os01g0225550	5.0876	1.41803e-07	1.45227e-05	up	Hypothetical gene.
Os01g0225600	90.1	3.30872e-07	2.75392e-05	up	Dehydrin.
Os01g0226450	28.0526	1.96927e-07	1.86679e-05	up	Hypothetical protein.
Os01g0227100	2.85099	5.45938e-07	4.02471e-05	up	oxidoreductase.
Os01g0227100	2.72637	5.25745e-06	0.000241898	up	oxidoreductase.
Os01g0227100	2.44327	4.43477e-06	0.0002098	up	oxidoreductase.
Os01g0227100	3.14459	9.40865e-07	6.09544e-05	up	oxidoreductase.
Os01g0227100	2.20361	4.56654e-06	0.000215095	up	oxidoreductase.
Os01g0227700	2.30134	6.717e-07	4.71898e-05	up	Cytochrome P450 family protein.
Os01g0228600	3.07695	3.23914e-08	4.58255e-06	up	2-hydroxyacid dehydrogenase (AGR_L_379p).
Os01g0231600	2.69224	1.86209e-07	1.78723e-05	up	Pleckstrin homology-type domain containing protein.
Os01g0231800	2.7044	2.09158e-06	0.000114132	up	cDNA clone:J033025F17 full insert sequence.
Os01g0233400	2.1276	3.48945e-06	0.000172117	up	Histone H4 acetyltransferase NuA4 complex Eaf6 domain containing protein.
Os01g0233900	2.73808	1.30792e-08	2.17133e-06	up	cDNA clone:J013003E06 full insert sequence.
Os01g0242600	2.00316	6.38863e-07	4.54034e-05	up	C2 calcium-dependent membrane targeting domain containing protein.
Os01g0243100	2.28854	3.49874e-07	2.87564e-05	up	Kinesin.
Os01g0246100	2.07571	8.56954e-06	0.000364242	up	Zinc finger RING/FYVE/PHD-type domain containing protein.
Os01g0246700	2.12812	4.19423e-06	0.000199873	up	WRKY transcription factor 1.
Os01g0253900	3.38486	7.15542e-06	0.000312913	up	Lipase class 3 family protein.
Os01g0253900	3.9923	5.73178e-06	0.000260155	up	Lipase class 3 family protein.
Os01g0256500	4.20187	2.30827e-07	2.09649e-05	up	ZnI.
Os01g0256500	3.69507	6.06979e-06	0.000272831	up	ZnI.
Os01g0263900	2.20234	1.85045e-06	0.0001036	up	Hypothetical protein.
Os01g0264000	2.20065	3.34528e-06	0.0001663	up	Dof transcription factor Promotion of nutrient ion uptake and accumulation
Os01g0276300	13.6146	4.23155e-07	3.30817e-05	up	Group 3 late embryogenesis abundant protein (Fragment).
Os01g0277600	2.6	1.28415e-06	7.75956e-05	up	aminophospholipid ATPase.
Os01g0279200	2.00452	1.29776e-06	7.82151e-05	up	COP9 signalosome complex subunit 2.
Os01g0284900	2.92101	2.49937e-06	0.000131628	up	Conserved hypothetical protein.
Os01g0284900	3.02282	2.36913e-06	0.000126231	up	Conserved hypothetical protein.
Os01g0295700	2.97802	3.8841e-06	0.000187663	up	Protein phosphatase-2C.
Os01g0303300	7.5788	1.64918e-07	1.62682e-05	up	Stress-inducible membrane pore protein.
Os01g0303600	2.44128	4.8559e-06	0.000226628	up	Zinc finger RING/FYVE/PHD-type domain containing protein.
Os01g0303600	3.86252	1.88245e-06	0.000104942	up	Zinc finger RING/FYVE/PHD-type domain containing protein.
Os01g0306400	80.1	1.70931e-06	9.69389e-05	up	Hypothetical conserved gene.
Os01g0307624	5.76252	1.21922e-07	1.29289e-05	up	Conserved hypothetical protein.
Os01g0307686	5.04624	2.40416e-06	0.000127631	up	embryonic abundant protein-like.
Os01g0307686	10.0699	3.7108e-08	5.08884e-06	up	embryonic abundant protein-like.
Os01g0310100	5.00938	5.29439e-06	0.000243332	up	PLDP1 (PHOSPHOLIPASE D P1)%3B phospholipase D.
Os01g0310100	2.16219	2.74067e-08	4.00528e-06	up	PLDP1 (PHOSPHOLIPASE D P1)%3B phospholipase D.
Os01g0314000	3.20788	6.57047e-07	4.63219e-05	up	Protein of unknown function DUF3615 domain containing protein.
Os01g0314100	2.0761	5.44046e-07	4.01564e-05	up	Catalytic domain of components of various dehydrogenase complexes containing protein.
Os01g0314100	2.79196	4.96462e-07	3.74133e-05	up	Catalytic domain of components of various dehydrogenase complexes containing protein.
Os01g0315850	2.14913	3.3656e-08	4.71484e-06	up	Hypothetical protein.
Os01g0317125	2.19134	6.36759e-07	4.5292e-05	up	Hypothetical protein.
Os01g0332100	2.35269	6.03518e-06	0.000271506	up	Invertase.
Os01g0332150	3.86876	5.89488e-07	4.27534e-05	up	Hypothetical protein.
Os01g0338401	11.8589	1.48656e-08	2.41084e-06	up	Hypothetical gene.
Os01g0360333	2.49803	4.9691e-07	3.74289e-05	up	Hypothetical protein.
Os01g0362100	2.75551	1.97874e-07	1.87325e-05	up	Esterase/lipase/thioesterase domain containing protein.
Os01g0369900	2.70675	2.36356e-07	2.13432e-05	up	12-oxo-phytodienoic acid reductase6.
Os01g0371300	2.04452	9.86108e-06	0.000409294	up	Hypothetical protein.
Os01g0382400	4.69286	1.17347e-07	1.25412e-05	up	Pathogenesis-related protein PRB1-2 precursor.
Os01g0385400	8.90315	1.49357e-07	1.51177e-05	up	C4-dicarboxylate transporter/malic acid transport protein.
Os01g0385400	4.06146	2.52971e-07	2.25023e-05	up	C4-dicarboxylate transporter/malic acid transport protein.
Os01g0386500	7.49958	5.87532e-07	4.26589e-05	up	Conserved hypothetical protein.
Os01g0511100	5.72363	5.97034e-06	0.000268904	up	UspA domain containing protein.
Os01g0511100	9.0315	8.00949e-08	9.44535e-06	up	UspA domain containing protein.
Os01g0511100	7.12192	2.09513e-06	0.000114297	up	UspA domain containing protein.
Os01g0511100	7.23192	3.3112e-06	0.000164931	up	UspA domain containing protein.
Os01g0514300	2.34145	8.78043e-09	1.55586e-06	up	Armadillo-type fold domain containing protein.
Os01g0527600	4.39532	5.09693e-11	4.82394e-08	up	RNA-dependent RNA polymerase Small RNA biogenesis Regulation of shoot apical meristem (SAM) initiation Spikelet development
Os01g0548600	4.48075	3.28169e-11	4.29555e-08	up	Protein kinase catalytic domain domain containing protein.
Os01g0552000	2.24801	6.94646e-06	0.000304974	up	Hypothetical conserved gene.
Os01g0571300	6.66258	6.02957e-08	7.51324e-06	up	Heat shock transcription factor 31 (Fragment).
Os01g0571300	5.958	4.96793e-07	3.74268e-05	up	Heat shock transcription factor 31 (Fragment).
Os01g0585100	2.11147	4.96008e-07	3.73943e-05	up	Integral membrane protein.
Os01g0585100	2.8187	2.28381e-07	2.07963e-05	up	Integral membrane protein.
Os01g0587300	5.13222	3.72301e-06	0.000181217	up	C2 domain-containing protein.
Os01g0594800	2.05517	1.49857e-06	8.71801e-05	up	D-amino acid oxidase.
Os01g0602400	2.35167	5.73392e-06	0.000260224	up	Cytochrome P450 monooxygenase CYP72A5 (Fragment).
Os01g0603100	2.97046	1.63847e-06	9.37769e-05	up	NB-ARC domain containing protein.
Os01g0606000	2.40054	2.99472e-07	2.55528e-05	up	MtN3 and saliva related transmembrane protein family protein.
Os01g0606000	2.17144	1.73261e-07	1.69058e-05	up	MtN3 and saliva related transmembrane protein family protein.
Os01g0606900	5.28485	4.99056e-07	3.75571e-05	up	Heat shock protein DnaJ N-terminal domain containing protein.
Os01g0606900	5.44474	2.86621e-07	2.47206e-05	up	Heat shock protein DnaJ N-terminal domain containing protein.
Os01g0609300	2.14086	2.44461e-06	0.00012947	up	Hypothetical conserved gene.
Os01g0609501	2.43151	2.16306e-06	0.000117321	up	Hypothetical protein.
Os01g0609900	2.66539	1.19107e-06	7.32104e-05	up	PDR-like ABC transporter (PDR4 ABC transporter).
Os01g0609900	6.71429	1.43564e-08	2.34263e-06	up	PDR-like ABC transporter (PDR4 ABC transporter).
Os01g0609900	3.09109	1.22115e-06	7.46297e-05	up	PDR-like ABC transporter (PDR4 ABC transporter).
Os01g0614900	2.34672	1.14706e-06	7.10883e-05	up	autophagy-related 7.
Os01g0614900	2.88165	6.54696e-07	4.62179e-05	up	autophagy-related 7.
Os01g0615050	6.80751	4.16491e-07	3.27119e-05	up	Proteinase inhibitor I13 potato inhibitor I family protein.
Os01g0615050	8.02899	7.62558e-08	9.08942e-06	up	Proteinase inhibitor I13 potato inhibitor I family protein.
Os01g0628900	2.98554	2.1227e-06	0.000115533	up	Cytochrome P450 family protein.
Os01g0633400	4.57221	3.70979e-07	3.00645e-05	up	Cystathionine beta-synthase core domain containing protein.
Os01g0633400	15.6174	1.59769e-08	2.56352e-06	up	Cystathionine beta-synthase core domain containing protein.
Os01g0642000	2.48456	7.34359e-06	0.000319621	up	Carboxylesterase type B family protein.
Os01g0642000	2.8901	2.63005e-07	2.3219e-05	up	Carboxylesterase type B family protein.
Os01g0642100	2.35344	4.35873e-11	4.74057e-08	up	Hypothetical conserved gene.
Os01g0644200	14.2165	4.98682e-08	6.48532e-06	up	Little protein 1.
Os01g0644200	20.6091	1.65442e-08	2.64251e-06	up	Little protein 1.
Os01g0649200	2.1219	2.80204e-06	0.000143858	up	Esterase.
Os01g0656200	2.12184	8.00249e-07	5.36532e-05	up	Protein phosphatase 2C family protein.
Os01g0658900	2.9165	4.37213e-07	3.39484e-05	up	OSBZ8.
Os01g0658900	2.82613	2.27091e-06	0.000121858	up	OSBZ8.
Os01g0681200	2.00113	2.25061e-06	0.000120937	up	Acyl-CoA synthetase (EC 6.2.1.3).
Os01g0681200	2.78753	1.60897e-07	1.59936e-05	up	Acyl-CoA synthetase (EC 6.2.1.3).
Os01g0686700	3.0582	2.86686e-07	2.47212e-05	up	protein binding protein.
Os01g0695800	2.12141	3.73362e-07	3.02055e-05	up	MDR-like ABC transporter.
Os01g0699100	5.44391	8.5876e-08	9.95427e-06	up	Serine/threonine protein kinase domain containing protein.
Os01g0699100	3.42324	9.29907e-07	6.03475e-05	up	Serine/threonine protein kinase domain containing protein.
Os01g0699400	25.8511	5.40661e-08	6.88928e-06	up	Serine/threonine protein kinase domain containing protein.
Os01g0699400	58.3625	1.2422e-08	2.0816e-06	up	Serine/threonine protein kinase domain containing protein.
Os01g0699400	9.09109	6.89092e-07	4.80697e-05	up	Serine/threonine protein kinase domain containing protein.
Os01g0699500	3.83165	1.42987e-06	8.42912e-05	up	Serine/threonine protein kinase domain containing protein.
Os01g0699600	4.30054	2.65569e-07	2.33868e-05	up	Serine/threonine protein kinase domain containing protein.
Os01g0701900	2.65797	4.68008e-07	3.57875e-05	up	Phosphatidylinositol transfer-like protein III.
Os01g0701900	3.17749	7.74493e-07	5.23833e-05	up	Phosphatidylinositol transfer-like protein III.
Os01g0701900	2.25928	6.94873e-07	4.83518e-05	up	Phosphatidylinositol transfer-like protein III.
Os01g0702500	9.70558	9.1079e-08	1.04074e-05	up	Dehydrin Rab25.
Os01g0705200	11.2934	6.98016e-07	4.85146e-05	up	Late embryogenesis abundant protein repeat containing protein.
Os01g0706600	2.65719	5.1736e-07	3.86457e-05	up	Conserved hypothetical protein.
Os01g0717000	2.93026	6.11844e-06	0.00027458	up	Choline kinase.
Os01g0717000	3.46074	7.21746e-07	4.97387e-05	up	Choline kinase.
Os01g0719000	5.67863	3.59171e-08	4.95768e-06	up	Protein of unknown function DUF581 family protein.
Os01g0725600	2.31946	8.55485e-08	9.93382e-06	up	Regulator of chromosome condensation RCC1 domain containing protein.
Os01g0727700	3.80237	7.53225e-07	5.12818e-05	up	Hypothetical conserved gene.
Os01g0728325	2.63342	9.63347e-06	0.000401551	up	Hypothetical protein.
Os01g0731150	2.34808	8.31517e-07	5.52593e-05	up	Hypothetical protein.
Os01g0733200	5.44276	1.05967e-07	1.16247e-05	up	Heat shock transcription factor 29 (Fragment).
Os01g0733200	6.21341	8.3503e-08	9.75524e-06	up	Heat shock transcription factor 29 (Fragment).
Os01g0733200	13.0963	2.81098e-08	4.08579e-06	up	Heat shock transcription factor 29 (Fragment).
Os01g0734000	2.27395	5.07856e-07	3.80973e-05	up	WRKY DNA binding protein.
Os01g0734399	2.9967	3.48081e-09	7.07525e-07	up	Hypothetical protein.
Os01g0738400	11.0843	9.12264e-06	0.000383892	up	Zn-finger transcription factor.
Os01g0740651	3.0222	7.416e-06	0.000322109	up	Hypothetical protein.
Os01g0740700	3.52343	7.90868e-07	5.31681e-05	up	Hypothetical protein.
Os01g0741900	2.15255	1.71131e-06	9.70261e-05	up	Auxin-responsive protein Drought tolerance Control of tiller outgrowth
Os01g0743500	3.53477	1.32072e-07	1.37196e-05	up	Cytosolic NADP malic enzyme.
Os01g0743500	3.42545	2.15901e-07	1.99434e-05	up	Cytosolic NADP malic enzyme.
Os01g0755700	2.22345	4.44669e-06	0.000210293	up	Zinc finger RING/FYVE/PHD-type domain containing protein.
Os01g0757200	8.83772	2.0655e-08	3.16517e-06	up	GA 2-oxidase3 GA metabolism
Os01g0757500	2.10981	5.94701e-09	1.1091e-06	up	Calcyclin-binding protein.
Os01g0760000	2.09278	4.61094e-09	8.95478e-07	up	Dynein light chain.
Os01g0767100	3.04851	1.79184e-12	2.22882e-08	up	Lysosomal Pro-X carboxypeptidase.
Os01g0772400	2.98125	3.40133e-07	2.81308e-05	up	Streptomyces cyclase/dehydrase family protein.
Os01g0772500	110	2.59552e-08	3.82488e-06	up	Glycosyl transferase family 14 protein.
Os01g0780800	2.25184	7.87512e-07	5.3011e-05	up	predicted protein.
Os01g0783200	2.31744	5.81005e-07	4.23231e-05	up	Diacylglycerol kinase.
Os01g0783500	2.26447	2.76119e-06	0.000142314	up	Rossmann-like alpha/beta/alpha sandwich fold domain containing protein.
Os01g0788500	2.03027	1.527e-07	1.53517e-05	up	Disease resistance protein domain containing protein.
Os01g0794400	2.38666	1.68373e-06	9.58222e-05	up	Thioredoxin domain 2 containing protein.
Os01g0794400	2.69882	2.5377e-06	0.000133034	up	Thioredoxin domain 2 containing protein.
Os01g0795600	103.6	5.83255e-08	7.32267e-06	up	Conserved hypothetical protein.
Os01g0800500	2.73658	4.88778e-07	3.69826e-05	up	Purple acid phosphatase N-terminal domain containing protein.
Os01g0800500	2.15885	1.08473e-06	6.78822e-05	up	Purple acid phosphatase N-terminal domain containing protein.
Os01g0800500	2.08871	1.87999e-07	1.7995e-05	up	Purple acid phosphatase N-terminal domain containing protein.
Os01g0802600	13.2451	3.003e-07	2.55976e-05	up	Circadian clock coupling factor ZGT.
Os01g0811100	2.55155	3.00001e-06	0.000152068	up	Proteasome subunit alpha type 3 (EC 3.4.25.1) (20S proteasome alpha subunit G) (20S proteasome subunit alpha-7).
Os01g0812050	2.14106	1.50862e-06	8.76618e-05	up	Conserved hypothetical protein.
Os01g0816100	2.26541	1.52614e-07	1.53517e-05	up	NAC domain protein.
Os01g0826400	2.28693	3.04643e-06	0.000153879	up	WRKY transcription factor 24 (WRKY24).
Os01g0830700	2.02054	3.64007e-06	0.000177917	up	Protein of unknown function DUF23C plant domain containing protein.
Os01g0832600	11.0595	2.07103e-08	3.16925e-06	up	Leucoanthocyanidin dioxygenase-like protein.
Os01g0833400	3.20716	3.36639e-06	0.000167071	up	Conserved hypothetical protein.
Os01g0837000	2.20083	5.34349e-07	3.96138e-05	up	Ankyrin repeat containing protein.
Os01g0837800	2.39777	4.00385e-06	0.000192297	up	metal tolerance protein.
Os01g0839100	3.18993	1.4486e-07	1.47614e-05	up	Zinc finger C2H2 domain containing protein.
Os01g0841500	2.53377	6.22562e-06	0.000278355	up	R1R2R3 MYB transcription factor Stress tolerance
Os01g0843800	4.49047	3.97528e-07	3.16339e-05	up	L-ascorbate oxidase.
Os01g0843800	6.70237	8.78774e-08	1.01236e-05	up	L-ascorbate oxidase.
Os01g0844300	2.66074	2.29371e-06	0.000122847	up	Peptidylprolyl isomerase.
Os01g0847000	2.37951	3.15476e-06	0.000158254	up	Hypothetical protein.
Os01g0848200	4.35533	2.15336e-06	0.00011687	up	Delta 1-pyrroline-5-carboxylate synthetase (P5CS) [Includes: Glutamate 5-kinase (EC 2.7.2.11) (Gamma-glutamyl kinase) (GK)%3B Gamma-glutamyl phosphate reductase (GPR) (EC 1.2.1.41) (Glutamate-5-semialdehyde dehydrogenase) (Glutamyl-gamma-semialdehyde dehydrogenase)].
Os01g0848200	7.27585	2.61705e-07	2.31236e-05	up	Delta 1-pyrroline-5-carboxylate synthetase (P5CS) [Includes: Glutamate 5-kinase (EC 2.7.2.11) (Gamma-glutamyl kinase) (GK)%3B Gamma-glutamyl phosphate reductase (GPR) (EC 1.2.1.41) (Glutamate-5-semialdehyde dehydrogenase) (Glutamyl-gamma-semialdehyde dehydrogenase)].
Os01g0848200	8.6393	2.38772e-08	3.57473e-06	up	Delta 1-pyrroline-5-carboxylate synthetase (P5CS) [Includes: Glutamate 5-kinase (EC 2.7.2.11) (Gamma-glutamyl kinase) (GK)%3B Gamma-glutamyl phosphate reductase (GPR) (EC 1.2.1.41) (Glutamate-5-semialdehyde dehydrogenase) (Glutamyl-gamma-semialdehyde dehydrogenase)].
Os01g0848900	2.48437	2.22488e-06	0.00011985	up	Conserved hypothetical protein.
Os01g0849000	4.26014	3.08047e-06	0.000155222	up	Hypothetical protein.
Os01g0850100	2.4449	1.38473e-07	1.42376e-05	up	Phosphatidic acid phosphatase-like protein.
Os01g0851100	7.95513	3.13276e-06	0.000157379	up	predicted protein.
Os01g0851100	2.19574	2.28666e-07	2.08133e-05	up	predicted protein.
Os01g0851100	2.09501	3.31633e-07	2.75897e-05	up	predicted protein.
Os01g0852900	2.49687	1.55353e-06	8.98152e-05	up	Hypothetical conserved gene.
Os01g0856850	2.47806	1.20998e-06	7.41077e-05	up	ribosomal protein S7.
Os01g0859300	82	1.22455e-06	7.47692e-05	up	ABA response element binding factor (Fragment).
Os01g0860800	2.79185	1.72042e-06	9.74249e-05	up	Glycoside hydrolase family 17 protein.
Os01g0860800	2.38753	2.14852e-12	2.27001e-08	up	Glycoside hydrolase family 17 protein.
Os01g0863300	4.49153	6.33276e-06	0.000282459	up	MCB2 protein.
Os01g0863300	6.0689	1.63028e-06	9.34091e-05	up	MCB2 protein.
Os01g0866800	2.33811	5.84204e-07	4.24902e-05	up	F24P17.15 protein (Tubby-like protein TULP9).
Os01g0867300	2.35044	5.84401e-06	0.000264171	up	bZIP transcription factor Abiotic stress response ABA signaling Suppressor of floral transition upon drought stress
Os01g0867600	2.54272	2.24045e-09	4.82793e-07	up	UDP-glucose:sterol glucosyltransferase (EC 2.4.1.173).
Os01g0868000	4.73684	1.23375e-06	7.51829e-05	up	AP2/ERF transcription factor Abiotic stress response Salt stress response
Os01g0871900	4.85973	3.91211e-06	0.000188748	up	POT family protein.
Os01g0876200	98.1	1.19974e-07	1.27743e-05	up	Chloride channel protein CLC-c (AtCLC-c).
Os01g0876400	4.28342	3.00367e-07	2.55981e-05	up	Hypothetical conserved gene.
Os01g0876400	4.80717	3.49495e-07	2.87309e-05	up	Hypothetical conserved gene.
Os01g0876400	2.19857	9.04426e-07	5.90461e-05	up	Hypothetical conserved gene.
Os01g0876400	4.32138	3.51186e-07	2.88418e-05	up	Hypothetical conserved gene.
Os01g0878300	2.09	9.85742e-08	1.10235e-05	up	Hypothetical conserved gene.
Os01g0878300	2.36733	5.20179e-07	3.88151e-05	up	Hypothetical conserved gene.
Os01g0878300	2.45425	1.07537e-07	1.17725e-05	up	Hypothetical conserved gene.
Os01g0897800	2.00802	6.88262e-07	4.8034e-05	up	Rad21/Rec8-like protein.
Os01g0908700	3.3033	1.30047e-06	7.83675e-05	up	Hnrpa2b1-prov protein.
Os01g0908800	2.42957	8.02075e-09	1.4369e-06	up	Pentatricopeptide repeat domain containing protein.
Os01g0916350	2.06077	7.41052e-06	0.000321904	up	Hypothetical gene.
Os01g0918400	2.06295	1.09172e-07	1.19022e-05	up	Conserved hypothetical protein.
Os01g0920100	2.07135	1.01533e-06	6.45405e-05	up	Conserved hypothetical protein.
Os01g0923300	2.03363	2.1001e-06	0.000114509	up	Cystathionine beta-synthase core domain containing protein.
Os01g0923700	2.7216	2.01626e-07	1.89814e-05	up	Histidine kinase Abscisic acid (ABA)-induced antioxidant defense
Os01g0941200	2.1253	2.52964e-07	2.25023e-05	up	Glucan endo-C3-beta-glucosidase GII precursor (EC 3.2.1.39) ((1->3)- beta-glucan endohydrolase GII) ((1->3)-beta-glucanase isoenzyme GII) (Beta-C3-endoglucanase GII).
Os01g0944900	5.40679	1.97447e-07	1.87064e-05	up	Glucan endo-C3-beta-D-glucosidase.
Os01g0947000	67.1	1.64713e-06	9.41468e-05	up	Beta-C3-glucanase precursor.
Os01g0951400	2.31785	1.70658e-06	9.68231e-05	up	UMP synthase.
Os01g0952300	2.2119	8.2284e-06	0.000352149	up	Ran GTPase binding / chromatin binding / zinc ion binding.
Os01g0952800	130.4	2.56874e-09	5.40587e-07	up	Conserved hypothetical protein.
Os01g0952800	8.00629	4.48318e-08	5.93439e-06	up	Conserved hypothetical protein.
Os01g0952900	5.94868	1.68402e-06	9.58261e-05	up	Conserved hypothetical protein.
Os01g0954000	2.93872	9.29927e-07	6.03475e-05	up	NADPH-dependent FMN reductase family protein.
Os01g0955100	3.00866	3.34801e-06	0.000166354	up	Calmodulin-like protein (Fragment).
Os01g0956600	2.11436	1.09856e-07	1.19614e-05	up	Nucleotide-binding alpha-beta plait domain containing protein.
Os01g0960200	6.53024	8.29952e-08	9.70665e-06	up	Hypothetical conserved gene.
Os01g0962100	3.40213	2.02686e-07	1.90712e-05	up	Conserved hypothetical protein.
Os01g0962100	3.03313	4.85195e-06	0.000226469	up	Conserved hypothetical protein.
Os01g0967900	2.04015	5.68572e-09	1.06838e-06	up	Aspartyl aminopeptidase.
Os01g0971800	6.25645	5.68413e-07	4.16065e-05	up	Two-component response regulator ARR11 (Receiver-like protein 3).
Os01g0976300	3.29778	1.40658e-06	8.32664e-05	up	Heavy metal transport/detoxification protein domain containing protein.
Os02g0101000	2.86865	7.5762e-07	5.14975e-05	up	amino acid permease.
Os02g0107800	70.2	7.74199e-06	0.000334437	up	Conserved hypothetical protein.
Os02g0119600	2.89582	1.20592e-06	7.39126e-05	up	Conserved hypothetical protein.
Os02g0120600	2.00851	3.00979e-06	0.000152487	up	Ubiquitin-conjugating enzyme E2-17 kDa 9 (EC 6.3.2.19) (Ubiquitin- protein ligase 9) (Ubiquitin carrier protein 9) (UBCAT4B).
Os02g0120600	2.3968	1.97122e-07	1.86822e-05	up	Ubiquitin-conjugating enzyme E2-17 kDa 9 (EC 6.3.2.19) (Ubiquitin- protein ligase 9) (Ubiquitin carrier protein 9) (UBCAT4B).
Os02g0122600	2.21246	2.19401e-06	0.000118498	up	EF-Hand type domain containing protein.
Os02g0128300	7.76879	3.73805e-08	5.11957e-06	up	ENTH/VHS domain containing protein.
Os02g0136400	118.1	9.83891e-09	1.71044e-06	up	Conserved hypothetical protein.
Os02g0139000	3.40765	6.04344e-07	4.35337e-05	up	Transcription factor Regulation of Pi signaling and homeostasis Tolerance to low-Pi stress
Os02g0139000	4.14165	3.11488e-08	4.44312e-06	up	Transcription factor Regulation of Pi signaling and homeostasis Tolerance to low-Pi stress
Os02g0139000	3.16193	5.9448e-08	7.44051e-06	up	Transcription factor Regulation of Pi signaling and homeostasis Tolerance to low-Pi stress
Os02g0139100	2.04766	1.99691e-07	1.88496e-05	up	Activator of Hsp90 ATPase N-terminal domain containing protein.
Os02g0140800	6.58564	1.27129e-06	7.70811e-05	up	Conserved hypothetical protein.
Os02g0158900	8.00801	1.85828e-07	1.78438e-05	up	SNF4.
Os02g0158900	14.2831	1.60463e-07	1.59628e-05	up	SNF4.
Os02g0161100	2.72043	6.71014e-07	4.71494e-05	up	Actin-binding FH2 domain containing protein.
Os02g0162600	2.68974	1.07008e-06	6.71447e-05	up	Conserved hypothetical protein.
Os02g0168200	3.6559	7.35643e-08	8.81333e-06	up	Transfactor-like protein.
Os02g0176700	5.21481	5.64811e-06	0.000257074	up	autoinhibited calcium ATPase.
Os02g0179600	2.0711	3.66903e-06	0.000179133	up	Uncharacterized conserved protein UCP015417 vWA domain containing protein.
Os02g0181900	2.44694	1.14358e-08	1.94486e-06	up	ClpB.
Os02g0181900	2.46526	1.83044e-07	1.76285e-05	up	ClpB.
Os02g0185300	3.57586	5.79469e-08	7.28281e-06	up	Cytochrome P450 family protein.
Os02g0191000	16.4776	7.37043e-07	5.04338e-05	up	NB-ARC domain containing protein.
Os02g0191000	5.88172	1.74344e-06	9.83864e-05	up	NB-ARC domain containing protein.
Os02g0191200	276.9	5.34068e-10	1.5267e-07	up	Pentatricopeptide repeat domain containing protein.
Os02g0191200	2.72473	7.58006e-07	5.15154e-05	up	Pentatricopeptide repeat domain containing protein.
Os02g0191300	4.17273	2.39852e-06	0.000127428	up	Amino acid transporter-like protein.
Os02g0191600	3.95412	2.75326e-07	2.4041e-05	up	Basic-leucine zipper (bZIP) transcription factor domain containing protein.
Os02g0196800	2.37253	5.79386e-07	4.22197e-05	up	Fumarylacetoacetase.
Os02g0202800	2.19253	7.96711e-07	5.34754e-05	up	Hypothetical conserved gene.
Os02g0218700	10.8919	5.05531e-12	3.23806e-08	up	Allene oxide synthase (CYP74A3) Fatty acid 9-/13-hydroperoxide lyase (CYP74C) Biosynthesis of jasmonic acid (JA) Plant defense
Os02g0218700	10.0388	2.50559e-08	3.71124e-06	up	Allene oxide synthase (CYP74A3) Fatty acid 9-/13-hydroperoxide lyase (CYP74C) Biosynthesis of jasmonic acid (JA) Plant defense
Os02g0218700	4.45771	1.51611e-06	8.80124e-05	up	Allene oxide synthase (CYP74A3) Fatty acid 9-/13-hydroperoxide lyase (CYP74C) Biosynthesis of jasmonic acid (JA) Plant defense
Os02g0218750	5.15556	1.9348e-06	0.000107337	up	Hypothetical protein.
Os02g0226300	3.65034	2.55466e-07	2.26671e-05	up	Mitochondrial carrier protein domain containing protein.
Os02g0229800	2.07554	4.92289e-06	0.00022935	up	Conserved hypothetical protein.
Os02g0240100	4.53875	1.08132e-07	1.18224e-05	up	Peroxidase 2 (Fragment).
Os02g0247800	2.82661	1.69686e-06	9.6362e-05	up	calcium ion binding protein.
Os02g0247800	2.04179	7.84551e-07	5.28714e-05	up	calcium ion binding protein.
Os02g0257200	9.95797	1.70267e-07	1.66714e-05	up	Conserved hypothetical protein.
Os02g0257200	11.032	2.7471e-08	4.0133e-06	up	Conserved hypothetical protein.
Os02g0257250	127.8	4.28504e-09	8.38737e-07	up	Hypothetical gene.
Os02g0259850	3.57438	6.29438e-08	7.76313e-06	up	Hypothetical gene.
Os02g0259850	4.85077	5.15768e-07	3.85457e-05	up	Hypothetical gene.
Os02g0259900	7.87493	1.08626e-08	1.8616e-06	up	Conserved hypothetical protein.
Os02g0259900	6.15011	2.8304e-08	4.1052e-06	up	Conserved hypothetical protein.
Os02g0259900	6.26526	9.41018e-08	1.0652e-05	up	Conserved hypothetical protein.
Os02g0259900	5.42795	1.64044e-07	1.61978e-05	up	Conserved hypothetical protein.
Os02g0293350	6.34156	1.85345e-06	0.000103741	up	Hypothetical gene.
Os02g0313700	3.85623	3.2659e-06	0.000162906	up	Synaptotagmin C (Synaptic vesicle protein O-p65-C).
Os02g0327500	2.14587	6.15206e-07	4.41151e-05	up	Protein of unknown function DUF266 plant family protein.
Os02g0332450	3.87467	4.45433e-11	4.75249e-08	up	Hypothetical conserved gene.
Os02g0433900	83.5	1.12876e-06	7.01292e-05	up	Conserved hypothetical protein.
Os02g0462800	107.7	3.43935e-08	4.79126e-06	up	WRKY transcription factor 42 Transcriptional repressor Promotion of leaf senescence
Os02g0463401	2.10444	1.83171e-06	0.000102706	up	Conserved hypothetical protein.
Os02g0464550	5.76052	2.44222e-08	3.64471e-06	up	Hypothetical protein.
Os02g0466400	6.2574	6.11295e-07	4.39241e-05	up	Inositol phosphate kinase.
Os02g0469300	20.2125	6.88005e-09	1.25814e-06	up	ATP-binding region ATPase-like domain containing protein.
Os02g0471500	2.02675	3.20194e-07	2.68921e-05	up	protein phosphatase 2C containing protein.
Os02g0473200	2.35753	1.55494e-06	8.98719e-05	up	Hypothetical conserved gene.
Os02g0473200	2.16318	1.46241e-08	2.37988e-06	up	Hypothetical conserved gene.
Os02g0473200	3.75428	6.51203e-07	4.60482e-05	up	Hypothetical conserved gene.
Os02g0481700	2.12659	6.20945e-07	4.44298e-05	up	lipase class 3 family protein.
Os02g0511400	3.24848	2.99612e-06	0.000151941	up	Glucose/ribitol dehydrogenase family protein.
Os02g0513100	5.30303	1.50987e-07	1.52244e-05	up	MtN3 protein precursor.
Os02g0517300	2.40491	3.48215e-06	0.000171848	up	Topoisomerase II-associated protein PAT1 domain containing protein.
Os02g0517900	65.4	9.62501e-06	0.000401317	up	Aminotransferase-like plant mobile domain domain containing protein.
Os02g0521100	2.41176	6.13977e-06	0.000275186	up	Hypothetical conserved gene.
Os02g0526400	6.12128	7.89976e-07	5.3133e-05	up	ATP-dependent Clp protease ATP-binding subunit.
Os02g0526400	5.61579	7.1457e-06	0.000312617	up	ATP-dependent Clp protease ATP-binding subunit.
Os02g0526400	3.93003	3.47686e-06	0.000171666	up	ATP-dependent Clp protease ATP-binding subunit.
Os02g0527100	11.6497	3.51037e-08	4.86825e-06	up	DEAD-like helicase N-terminal domain containing protein.
Os02g0527100	13.3401	5.39709e-08	6.88129e-06	up	DEAD-like helicase N-terminal domain containing protein.
Os02g0527100	8.86179	2.93248e-08	4.2286e-06	up	DEAD-like helicase N-terminal domain containing protein.
Os02g0527200	2.26306	3.84546e-06	0.000186148	up	OSIGBa0142C11.2 protein.
Os02g0532401	4.44962	1.32108e-07	1.372e-05	up	Hypothetical gene.
Os02g0537000	2.20412	2.21484e-06	0.00011938	up	Pectinesterase inhibitor domain containing protein.
Os02g0540700	2.24908	6.0891e-06	0.000273554	up	Arm repeat-containing protein.
Os02g0546400	115.5	1.03798e-08	1.7883e-06	up	Hypothetical protein.
Os02g0551100	2.00957	4.88392e-06	0.00022776	up	Serine/threonine protein kinase Dehydration-inducible SNF1-related protein kinase 2
Os02g0551100	2.73372	3.42461e-07	2.82901e-05	up	Serine/threonine protein kinase Dehydration-inducible SNF1-related protein kinase 2
Os02g0556700	2.16123	2.42291e-06	0.000128482	up	H0525C06.4 protein.
Os02g0574500	2.71723	1.15554e-07	1.2425e-05	up	General substrate transporter domain containing protein.
Os02g0579000	2.84966	2.81999e-06	0.000144569	up	No apical meristem (NAM) protein domain containing protein.
Os02g0579600	7.33621	8.73444e-06	0.000370005	up	Transcription factor MADS27.
Os02g0586900	6.89297	1.31877e-07	1.37137e-05	up	Glycine rich protein (Fragment).
Os02g0592000	4.56897	5.39999e-06	0.00024754	up	OSIGBa0106G07.8 protein.
Os02g0592400	2.20105	2.14932e-07	1.98625e-05	up	Hypoxia induced protein conserved region family protein.
Os02g0592400	2.14676	8.339e-07	5.53911e-05	up	Hypoxia induced protein conserved region family protein.
Os02g0596100	2.77999	1.26533e-11	4.17983e-08	up	GLE1-like domain containing protein.
Os02g0596900	6.92593	6.12015e-07	4.3946e-05	up	Actin/actin-like family protein.
Os02g0601350	2.61574	4.13036e-08	5.55673e-06	up	Hypothetical protein.
Os02g0616600	6.42346	1.09948e-06	6.86633e-05	up	Conserved hypothetical protein.
Os02g0621300	4.84225	2.42808e-06	0.000128707	up	Fatty acid hydroxylase domain containing protein.
Os02g0621300	4.63315	5.88618e-06	0.000265736	up	Fatty acid hydroxylase domain containing protein.
Os02g0622500	2.32429	1.34569e-07	1.39107e-05	up	Conserved hypothetical protein.
Os02g0625300	2.007	6.93237e-06	0.000304481	up	PEPC kinase.
Os02g0626400	2.38505	6.58146e-06	0.000291247	up	Phenylalanine ammonia-lyase.
Os02g0629000	4.40713	1.1706e-06	7.2202e-05	up	Protein of unknown function DUF584 family protein.
Os02g0629000	8.25763	2.03554e-07	1.91246e-05	up	Protein of unknown function DUF584 family protein.
Os02g0638650	3.82387	2.55655e-06	0.000133872	up	Pathogenesis-related transcriptional factor and ERF domain containing protein.
Os02g0641300	2.43706	8.33806e-07	5.53911e-05	up	Hypothetical conserved gene.
Os02g0643000	2.03924	1.23134e-07	1.30247e-05	up	VAP27.
Os02g0649900	3.56111	2.02332e-06	0.000111197	up	Metal-nicotianamine (NA) transporter Fe and Mn transport to the endosperm
Os02g0654700	2.95781	2.00106e-07	1.88715e-05	up	AP2/ERF family protein Abiotic stress response
Os02g0655200	3.04724	7.76882e-07	5.24945e-05	up	ERF family protein Transcriptional regulator Salt stress tolerance
Os02g0658200	2.27435	7.25948e-10	1.90754e-07	up	Zinc finger PHD-type domain containing protein.
Os02g0671100	2.53297	2.22067e-06	0.000119663	up	Cyclin-like F-box domain containing protein.
Os02g0672600	2.30872	1.3028e-07	1.35801e-05	up	N6-adenosine-methyltransferase 70 kDa subunit (EC 2.1.1.62) (MT-A70) (Methyltransferase-like protein 3). Splice isoform 2.
Os02g0676400	33.6269	1.27241e-08	2.12298e-06	up	Multi antimicrobial extrusion protein MatE family protein.
Os02g0682300	3.40315	2.50273e-06	0.000131706	up	Zinc finger RING/FYVE/PHD-type domain containing protein.
Os02g0685200	4.93666	1.77925e-07	1.72535e-05	up	MYB transcription factor Transcriptional activator in mediating stress and rhythm responsivegene expression
Os02g0685200	3.86506	1.55204e-06	8.9797e-05	up	MYB transcription factor Transcriptional activator in mediating stress and rhythm responsivegene expression
Os02g0685350	3.47008	3.59592e-07	2.93725e-05	up	Hypothetical gene.
Os02g0707900	3.87381	3.39142e-07	2.80708e-05	up	Hypothetical conserved gene.
Os02g0707900	4.34684	1.94324e-07	1.84749e-05	up	Hypothetical conserved gene.
Os02g0707900	3.05493	9.01764e-07	5.89017e-05	up	Hypothetical conserved gene.
Os02g0708000	2.9739	4.68193e-07	3.57887e-05	up	Conserved hypothetical protein.
Os02g0711900	2.2643	5.92698e-06	0.000267264	up	groundhog protein 7.
Os02g0712500	2.28729	2.10484e-06	0.000114708	up	Protein of unknown function DUF23 family protein.
Os02g0712500	2.44173	9.40204e-07	6.09209e-05	up	Protein of unknown function DUF23 family protein.
Os02g0713250	18.58	9.3089e-09	1.63375e-06	up	Hypothetical conserved gene.
Os02g0717500	2.686	8.44127e-07	5.59689e-05	up	X7 (Fragment).
Os02g0717600	2.31903	2.27793e-06	0.000122126	up	predicted protein.
Os02g0720000	2.01295	4.06721e-07	3.21596e-05	up	Conserved hypothetical protein.
Os02g0730100	11.1789	5.07471e-06	0.000235001	up	Pre-mRNA processing ribonucleoprotein binding region%3B NOSIC.
Os02g0733900	4.6062	1.61234e-06	9.25569e-05	up	Conserved hypothetical protein.
Os02g0736150	2.14694	9.1839e-11	5.90423e-08	up	Hypothetical protein.
Os02g0736300	2.24275	8.19219e-07	5.46823e-05	up	Membrane attack complex component/perforin/complement C9 family protein.
Os02g0736300	6.64965	3.59893e-07	2.93857e-05	up	Membrane attack complex component/perforin/complement C9 family protein.
Os02g0736400	3.70131	6.35687e-06	0.000283235	up	Aldolase-type TIM barrel domain containing protein.
Os02g0736400	4.28656	5.57508e-07	4.09003e-05	up	Aldolase-type TIM barrel domain containing protein.
Os02g0736400	2.60494	8.07468e-06	0.00034687	up	Aldolase-type TIM barrel domain containing protein.
Os02g0736550	2.97825	2.03996e-08	3.13547e-06	up	Hypothetical gene.
Os02g0740500	3.28507	2.97761e-07	2.5453e-05	up	Conserved hypothetical protein.
Os02g0740700	3.29375	9.17643e-07	5.96969e-05	up	Peptidase M10A and M12B matrixin and adamalysin family protein.
Os02g0748300	7.89143	3.43411e-07	2.83355e-05	up	Kelch motif family protein.
Os02g0749500	2.43299	1.4875e-06	8.68167e-05	up	SEC6.
Os02g0753800	3.09244	2.28325e-06	0.000122365	up	Calcium-binding protein Annexin Heat and drought stress tolerance
Os02g0753800	3.0503	6.53874e-07	4.61753e-05	up	Calcium-binding protein Annexin Heat and drought stress tolerance
Os02g0753800	2.17502	3.49496e-06	0.000172299	up	Calcium-binding protein Annexin Heat and drought stress tolerance
Os02g0759400	3.25132	7.87116e-06	0.000339184	up	Zinc finger RING/FYVE/PHD-type domain containing protein.
Os02g0759500	4.22723	1.69442e-08	2.69221e-06	up	Pentatricopeptide repeat domain containing protein.
Os02g0761300	106.3	4.18693e-08	5.61609e-06	up	Protein of unknown function DUF1645 family protein.
Os02g0763800	15.1504	8.10204e-10	2.08671e-07	up	Xyloglucan fucosyltransferase domain containing protein.
Os02g0764700	6.23816	1.6952e-07	1.66243e-05	up	Ethylene-responsive transcription factor 4
Os02g0766700	2.60274	6.34118e-06	0.000282737	up	bZIP transcription factor Regulation of ABA signaling and biosynthesis Drought resistance
Os02g0767200	2.87237	4.58813e-08	6.04681e-06	up	predicted protein.
Os02g0767200	2.54586	4.37478e-07	3.39628e-05	up	predicted protein.
Os02g0771600	2.08905	2.84286e-06	0.000145548	up	ACC oxidase Ethylene biosynthesis
Os02g0771600	2.24115	5.64581e-06	0.000256997	up	ACC oxidase Ethylene biosynthesis
Os02g0772500	2.16773	1.04603e-06	6.60372e-05	up	Protein of unknown function DUF1740 domain containing protein.
Os02g0782500	2.92605	5.92182e-06	0.00026706	up	17.5 kDa class II heat shock protein.
Os02g0783625	3.42685	2.08156e-06	0.000113718	up	Lysine ketoglutarate reductase/saccharopine dehydrogenase.
Os02g0783700	6.88022	2.8248e-08	4.09989e-06	up	Lysine ketoglutarate reductase/saccharopine dehydrogenase.
Os02g0791700	6.98936	1.43779e-07	1.46796e-05	up	STE20/SPS1-related proline-alanine-rich protein kinase.
Os02g0794900	4.57741	6.27947e-09	1.16017e-06	up	Formin-like protein 7.
Os02g0797100	6.24444	3.36411e-08	4.71432e-06	up	Dehydration responsive element binding protein 2B (DREB2B protein).
Os02g0813800	2.20411	2.80881e-06	0.000144084	up	Non-protein coding transcript.
Os02g0815400	2.06684	1.97088e-08	3.04889e-06	up	Tfm5 protein.
Os02g0816800	2.068	1.16393e-06	7.18813e-05	up	NAD(P)-binding domain containing protein.
Os02g0816900	2.23659	1.06859e-06	6.71109e-05	up	Myosin XI (Fragment).
Os02g0819400	2.71207	4.41692e-11	4.75249e-08	up	Phytic acid metabolism
Os02g0821900	2.08416	1.58377e-08	2.54699e-06	up	Conserved hypothetical protein.
Os02g0824100	6.19444	7.999e-06	0.000343898	up	Cytochrome P450 family protein.
Os02g0824500	5.33309	2.40619e-06	0.000127723	up	Remorin.
Os02g0829500	2.3146	8.37664e-08	9.77791e-06	up	Zn-dependent hydrolases including glyoxylases.
Os02g0832400	2.17816	2.73766e-07	2.3944e-05	up	Callose synthase 1 catalytic subunit.
Os03g0107700	2.27161	3.63993e-06	0.000177917	up	EL2 protein.
Os03g0111300	13.4732	1.26971e-08	2.12015e-06	up	Nonspecific lipid-transfer protein 2 (nsLTP2) (7 kDa lipid transfer protein).
Os03g0112600	2.07004	1.57591e-06	9.07735e-05	up	Plus-3 domain containing protein expressed.
Os03g0120100	2.40827	1.08991e-06	6.81462e-05	up	Protein of unknown function DUF284 transmembrane eukaryotic family protein.
Os03g0125100	2.34813	2.77594e-06	0.000142883	up	Beta-carotene hydroxylase Drought and oxidative stress resistance
Os03g0130300	2.61855	4.83093e-07	3.67137e-05	up	Cp-thionin.
Os03g0133100	29.0489	2.67259e-07	2.3502e-05	up	Conserved hypothetical protein.
Os03g0133100	41.9211	6.61122e-09	1.21423e-06	up	Conserved hypothetical protein.
Os03g0133300	2.04402	8.8857e-06	0.000375453	up	F7F22.5.
Os03g0133300	2.38888	5.40136e-06	0.000247576	up	F7F22.5.
Os03g0133650	13.6938	4.93654e-08	6.43379e-06	up	Hypothetical gene.
Os03g0136500	2.28182	2.95333e-07	2.52863e-05	up	protein-methionine-s-oxide reductase.
Os03g0142800	2.35237	8.92062e-08	1.02349e-05	up	Hypothetical conserved gene.
Os03g0145300	7.08497	9.28024e-06	0.000389533	up	Glycosyl transferase family 14 domain containing protein.
Os03g0146400	2.07456	2.92199e-06	0.000148977	up	Lethal leaf-spot 1 (Fragment).
Os03g0154300	3.50466	2.62795e-11	4.28807e-08	up	Conserved hypothetical protein.
Os03g0154300	4.69605	1.29295e-08	2.15215e-06	up	Conserved hypothetical protein.
Os03g0159100	2.84908	9.71655e-08	1.08967e-05	up	Protein kinase APK1B chloroplast precursor (EC 2.7.1.-).
Os03g0161100	2.11503	1.46673e-07	1.4921e-05	up	Viral A-type inclusion protein repeat containing protein expressed.
Os03g0161500	3.97142	1.26201e-06	7.65847e-05	up	EGF domain containing protein.
Os03g0161500	4.17604	4.05098e-06	0.000194075	up	EGF domain containing protein.
Os03g0161500	3.66209	1.6807e-06	9.57271e-05	up	EGF domain containing protein.
Os03g0168200	2.56631	3.91011e-07	3.12506e-05	up	F16A14.21.
Os03g0168300	3.79783	4.29738e-06	0.000204122	up	Protein of unknown function DUF1997 domain containing protein.
Os03g0177300	4.59122	6.17855e-11	5.26659e-08	up	Zinc finger RING/FYVE/PHD-type domain containing protein.
Os03g0180900	5.27715	1.97161e-06	0.000108908	up	Tify domain containing protein.
Os03g0180900	4.56903	9.66884e-08	1.08662e-05	up	Tify domain containing protein.
Os03g0181100	4.32554	1.80128e-06	0.000101218	up	Tify domain containing protein.
Os03g0184100	4.0246	3.79746e-08	5.19029e-06	up	Conserved hypothetical protein.
Os03g0187300	3.55825	7.0753e-08	8.53944e-06	up	transducin family protein / WD-40 repeat family protein.
Os03g0190900	2.04051	9.5571e-09	1.66831e-06	up	F12K21.3.
Os03g0191850	2.1764	1.35769e-06	8.09044e-05	up	Hypothetical gene.
Os03g0198600	6.39074	1.20983e-08	2.03705e-06	up	Homeodomain-leucine zipper transcription factor
Os03g0200200	2.58748	1.0179e-06	6.46067e-05	up	Conserved hypothetical protein.
Os03g0207200	2.45985	3.73783e-06	0.000181854	up	Syntaxin 6 N-terminal domain containing protein.
Os03g0214200	2.04565	3.28424e-06	0.000163685	up	Ninja-family protein 1.
Os03g0214200	2.36784	2.58918e-06	0.000135163	up	Ninja-family protein 1.
Os03g0218500	2.23743	7.00596e-08	8.46542e-06	up	70kD heat shock protein.
Os03g0221300	7.37306	4.96598e-06	0.000231026	up	No apical meristem protein expressed.
Os03g0224200	2.11836	1.16445e-07	1.24924e-05	up	response regulator 8.
Os03g0224200	2.1311	3.63097e-07	2.95902e-05	up	response regulator 8.
Os03g0230300	4.87804	1.47282e-06	8.61862e-05	up	Non-protein coding transcript.
Os03g0231700	2.41802	2.18312e-06	0.000118167	up	Squalene monooxygenase 2 (EC 1.14.99.7).
Os03g0241400	2.13239	2.76972e-06	0.000142667	up	Hypothetical protein.
Os03g0241900	2.16398	1.22796e-06	7.48948e-05	up	Senescence-associated protein expressed.
Os03g0241900	3.09955	1.08501e-06	6.78899e-05	up	Senescence-associated protein expressed.
Os03g0247900	2.44612	3.56855e-06	0.00017515	up	F5O11.14 (ACR8).
Os03g0250000	2.50715	3.41947e-06	0.000169327	up	Conserved hypothetical protein.
Os03g0250000	2.13442	1.38265e-06	8.21023e-05	up	Conserved hypothetical protein.
Os03g0258200	5.89183	7.65262e-07	5.18752e-05	up	Alpha/beta hydrolase fold-3 domain containing protein.
Os03g0258200	4.41143	4.11092e-07	3.24264e-05	up	Alpha/beta hydrolase fold-3 domain containing protein.
Os03g0264150	2.03018	1.54336e-06	8.94103e-05	up	Hypothetical gene.
Os03g0265200	2.12538	2.708e-07	2.37473e-05	up	Josephin-like protein.
Os03g0266300	2.67674	6.66774e-06	0.000294326	up	Class I low-molecular-weight heat shock protein 17.9.
Os03g0266700	2.37604	1.01826e-10	6.10654e-08	up	Src homology-3 domain containing protein.
Os03g0266900	3.32431	3.61543e-06	0.000177035	up	Low molecular mass heat shock protein Oshsp17.3.
Os03g0267000	3.67487	9.99975e-07	6.38446e-05	up	Low molecular mass heat shock protein Oshsp18.0.
Os03g0268100	3.05284	3.03139e-09	6.25802e-07	up	T-snare.
Os03g0268900	2.06491	4.23263e-06	0.000201496	up	Short chain alcohol dehydrogenase-like.
Os03g0277300	2.62027	6.59563e-06	0.0002916	up	Heat shock protein 70.
Os03g0277300	3.88116	2.49144e-06	0.000131308	up	Heat shock protein 70.
Os03g0281000	2.01078	8.20424e-07	5.47195e-05	up	Ankyrin-like protein.
Os03g0286900	5.03783	6.95699e-07	4.83933e-05	up	RCI2 (rare cold-inducible 2) family protein Drought resistance
Os03g0286900	5.45923	5.60992e-08	7.08428e-06	up	RCI2 (rare cold-inducible 2) family protein Drought resistance
Os03g0289800	5.25772	5.8369e-07	4.24602e-05	up	Leucoanthocyanidin dioxygenase-like protein.
Os03g0289850	3.74537	1.0697e-06	6.7143e-05	up	Hypothetical gene.
Os03g0291500	2.55109	7.86205e-07	5.29636e-05	up	Asparagine synthetase Biosynthesis of asparagine following the supply of ammonium
Os03g0296200	13.5671	6.92681e-07	4.82628e-05	up	Conserved hypothetical protein.
Os03g0301800	2.06204	5.1097e-08	6.59845e-06	up	Kinesin-like polypeptides 9 (Fragment).
Os03g0301800	3.0026	3.17382e-06	0.000158969	up	Kinesin-like polypeptides 9 (Fragment).
Os03g0305550	10.9483	5.2924e-07	3.93316e-05	up	Hypothetical gene.
Os03g0305600	10.3076	4.94717e-07	3.73169e-05	up	Mitochondrial import inner membrane translocase subunit Tim17/22 family protein.
Os03g0309000	2.32296	2.8109e-07	2.4325e-05	up	Virulence factor pectin lyase fold family protein.
Os03g0314750	4.09129	8.74486e-06	0.000370316	up	Hypothetical conserved gene.
Os03g0314800	4.34432	2.23286e-06	0.000120152	up	Plant neutral invertase family protein.
Os03g0314800	4.24541	2.91001e-07	2.50066e-05	up	Plant neutral invertase family protein.
Os03g0321700	2.21945	5.94118e-07	4.30283e-05	up	WRKY transcription factor 55.
Os03g0322900	14.6341	1.07437e-06	6.73572e-05	up	Late embryogenesis abundant (LEA) protein Abiotic stress tolerance
Os03g0326000	2.48236	5.71775e-06	0.000259602	up	Phospholipid-transporting ATPase 1 (EC 3.6.3.1) (Aminophospholipid flippase 1).
Os03g0327100	2.20989	1.87033e-06	0.000104528	up	CUC1.
Os03g0327100	2.35491	5.42579e-06	0.000248559	up	CUC1.
Os03g0327800	3.61589	6.81913e-06	0.000300131	up	NAC Family transcriptional activator Abiotic stress response Positive regulator of leaf senescence
Os03g0330200	4.54521	9.78185e-06	0.000406614	up	23-bisphosphoglycerate-independent phosphoglycerate mutase
Os03g0330200	5.08213	8.1544e-08	9.57049e-06	up	23-bisphosphoglycerate-independent phosphoglycerate mutase
Os03g0334200	3.74735	4.95802e-07	3.73854e-05	up	Protein of unknown function DUF3133 domain containing protein.
Os03g0334300	7.08333	4.84491e-08	6.32802e-06	up	predicted protein.
Os03g0335300	2.09932	1.91103e-07	1.82302e-05	up	Vacuolar targeting receptor bp-80.
Os03g0336600	2.21266	6.42701e-07	4.55766e-05	up	Reticulon family protein.
Os03g0340500	4.65441	2.51305e-07	2.23909e-05	up	sucrose synthase2.
Os03g0340500	3.39467	7.46554e-07	5.09418e-05	up	sucrose synthase2.
Os03g0340500	2.24633	1.18101e-06	7.2702e-05	up	sucrose synthase2.
Os03g0340500	2.98305	4.20728e-07	3.29346e-05	up	sucrose synthase2.
Os03g0347300	2.2841	4.89173e-06	0.000228074	up	Zinc finger CW-type domain containing protein.
Os03g0348900	4.04545	8.2166e-06	0.000351858	up	Ring finger E3 ubiquitin ligase Abiotic stress tolerance
Os03g0356498	2.5906	5.92855e-09	1.10664e-06	up	rhythmically expressed protein.
Os03g0362200	2.17873	3.18093e-06	0.000159231	up	Armadillo-like helical domain containing protein.
Os03g0366700	3.32278	2.5625e-06	0.000134084	up	predicted protein.
Os03g0369800	2.31317	1.06318e-11	4.17983e-08	up	Novel plant SNARE 13 (AtNPSN13).
Os03g0374600	2.42432	3.86752e-06	0.00018696	up	Glucan endo-C3-beta-glucosidase 4.
Os03g0386000	2.22188	9.29744e-06	0.00039016	up	WD40 subfamily protein Salt stress
Os03g0388800	5.16093	6.29239e-07	4.49192e-05	up	Hydrolase.
Os03g0390200	2.42379	7.18713e-07	4.96025e-05	up	Serine/threonine-protein kinase SAPK1
Os03g0402800	2.36264	7.98436e-06	0.000343374	up	ZIM motif family protein expressed.
Os03g0402800	2.17951	9.58953e-07	6.18485e-05	up	ZIM motif family protein expressed.
Os03g0416500	2.19579	1.72243e-07	1.6822e-05	up	6-phosphogluconolactonase domain containing protein.
Os03g0424000	5.0813	1.03422e-08	1.78381e-06	up	U-box domain containing protein.
Os03g0436500	18.234	3.93054e-06	0.000189421	up	Zinc finger BED-type predicted domain containing protein.
Os03g0439000	3.35464	1.57096e-07	1.56943e-05	up	Conserved hypothetical protein.
Os03g0441000	2.30697	2.61345e-08	3.84595e-06	up	Transcription initiation factor TFIID component TAF4 family protein expressed.
Os03g0448600	2.0271	1.63226e-09	3.70805e-07	up	WD40 repeat-like domain containing protein.
Os03g0556600	10.4458	3.72043e-06	0.000181134	up	Serine/threonine protein kinase-related domain containing protein.
Os03g0561283	6.83405	7.40117e-06	0.000321597	up	Conserved hypothetical protein.
Os03g0561400	202.5	3.60294e-09	7.27033e-07	up	Conserved hypothetical protein.
Os03g0561400	4.47794	1.86274e-08	2.90823e-06	up	Conserved hypothetical protein.
Os03g0586700	2.35535	6.23162e-07	4.45421e-05	up	Conserved hypothetical protein.
Os03g0594100	67.5	6.99736e-06	0.000306794	up	Cytochrome P450 family protein.
Os03g0598200	2.83251	5.51325e-06	0.00025194	up	Nop14-like protein family protein.
Os03g0610400	3.34964	3.63558e-07	2.96106e-05	up	Zinc finger C2H2-like domain containing protein.
Os03g0622500	2.3448	2.85028e-07	2.45983e-05	up	Hypothetical gene.
Os03g0623100	7.45601	5.91303e-07	4.28591e-05	up	Conserved hypothetical protein.
Os03g0626700	2.1122	2.3075e-07	2.09623e-05	up	Multi antimicrobial extrusion protein MatE family protein.
Os03g0638400	13.3346	3.44809e-08	4.79631e-06	up	OSIGBa0153E02-OSIGBa0093I20.19 protein.
Os03g0643300	2.58971	4.60755e-07	3.53351e-05	up	Ornithine delta-aminotransferase Abiotic stress tolerance
Os03g0643300	2.94916	2.42746e-07	2.17807e-05	up	Ornithine delta-aminotransferase Abiotic stress tolerance
Os03g0656850	3.87227	4.47387e-08	5.92392e-06	up	Conserved hypothetical protein.
Os03g0659400	2.6453	6.89018e-07	4.80697e-05	up	Hypothetical conserved gene.
Os03g0659400	3.28378	1.75399e-07	1.70672e-05	up	Hypothetical conserved gene.
Os03g0659400	2.08376	2.02695e-06	0.000111339	up	Hypothetical conserved gene.
Os03g0663400	2.2541	3.07424e-06	0.000154991	up	Thaumatin-like protein.
Os03g0676400	8.09615	1.69943e-06	9.64896e-05	up	VQ domain containing protein.
Os03g0689100	2.8417	1.59159e-07	1.5863e-05	up	predicted protein.
Os03g0689300	2.72316	9.84344e-07	6.30657e-05	up	H-ATPase.
Os03g0689350	3.53573	3.1686e-07	2.66598e-05	up	Hypothetical protein.
Os03g0693900	3.03446	4.22306e-07	3.30275e-05	up	Oxalate oxidase 1 (EC 1.2.3.4) (Germin).
Os03g0694000	3.56376	1.98767e-06	0.000109637	up	Oxalate oxidase 1 (EC 1.2.3.4) (Germin).
Os03g0701200	2.44123	1.31836e-06	7.9231e-05	up	Sugar-starvation induced protein (Fragment).
Os03g0708100	2.47725	9.30884e-10	2.33711e-07	up	phytanoyl-CoA dioxygenase (PhyH) family protein.
Os03g0710900	3.03482	1.13981e-08	1.93924e-06	up	CCAAT displacement protein-related / CDP-related.
Os03g0712900	3.60976	6.7531e-08	8.21151e-06	up	Pentatricopeptide repeat domain containing protein.
Os03g0713000	3.62021	2.47138e-06	0.000130561	up	Chloroplast threonine deaminase 1.
Os03g0715500	2.24436	6.13296e-06	0.000275021	up	TVLP1.
Os03g0717600	3.26157	2.19605e-07	2.02017e-05	up	Zinc finger C2H2-type matrin domain containing protein.
Os03g0717900	2.03067	9.80762e-06	0.000407525	up	mRNA clone: RTFL01-13-K15.
Os03g0718800	3.17026	1.18184e-06	7.27324e-05	up	Physical impedance induced protein.
Os03g0719400	2.40173	1.14841e-06	7.1162e-05	up	Alpha/beta hydrolase fold-1 domain containing protein.
Os03g0722100	2.61896	9.64781e-07	6.21136e-05	up	SANT eukarya domain containing protein.
Os03g0723400	9.70262	5.55834e-07	4.08059e-05	up	UFG2.
Os03g0723400	7.49565	2.77398e-07	2.41319e-05	up	UFG2.
Os03g0723400	8.06205	5.00254e-08	6.49777e-06	up	UFG2.
Os03g0741100	2.95294	3.01659e-07	2.56772e-05	up	Basic helix-loop-helix transcription factor Drought tolerance
Os03g0743500	4.11855	2.06459e-07	1.93245e-05	up	Calmodulin 1 (Fragment).
Os03g0743500	2.61107	3.97207e-06	0.000191096	up	Calmodulin 1 (Fragment).
Os03g0743650	14	2.48574e-08	3.69531e-06	up	Conserved hypothetical protein.
Os03g0744600	2.09036	9.26765e-07	6.02055e-05	up	Ripening-associated protein (Fragment).
Os03g0745000	2.5958	1.40168e-06	8.30344e-05	up	Heat stress transcription factor A-2a.
Os03g0745000	6.33565	7.45127e-08	8.90929e-06	up	Heat stress transcription factor A-2a.
Os03g0747900	2.03711	1.05922e-07	1.16229e-05	up	Myosin heavy chain class XI E1 protein.
Os03g0756500	2.47132	7.34894e-07	5.03738e-05	up	PAF1 complex component.
Os03g0756500	5.065	8.72704e-08	1.00812e-05	up	PAF1 complex component.
Os03g0757000	6.43612	6.00996e-07	4.33832e-05	up	UDP-glucuronosyl/UDP-glucosyltransferase domain containing protein.
Os03g0758950	7.1105	2.77547e-06	0.000142876	up	Transcriptional activator Defense responses to rice sheath blight
Os03g0758950	7.96774	5.25981e-06	0.000241953	up	Transcriptional activator Defense responses to rice sheath blight
Os03g0758950	87	5.43957e-07	4.01564e-05	up	Transcriptional activator Defense responses to rice sheath blight
Os03g0761100	3.47025	1.26977e-06	7.70003e-05	up	Protein phosphatase 2C-like protein.
Os03g0765400	71.6842	7.37055e-09	1.33456e-06	up	Conserved hypothetical protein.
Os03g0765400	7.89315	9.06834e-08	1.03762e-05	up	Conserved hypothetical protein.
Os03g0765400	2.53978	1.64488e-06	9.40543e-05	up	Conserved hypothetical protein.
Os03g0767900	3.03273	2.12842e-07	1.97325e-05	up	Uncharacterised protein family UPF0497 trans-membrane plant domain containing protein.
Os03g0767900	2.34877	7.75696e-07	5.24479e-05	up	Uncharacterised protein family UPF0497 trans-membrane plant domain containing protein.
Os03g0769700	2.23954	7.22374e-07	4.97568e-05	up	Uncharacterised conserved protein UCP031279 domain containing protein.
Os03g0773300	2.9764	9.59923e-07	6.18657e-05	up	wound and phytochrome signaling involved receptor like kinase.
Os03g0773600	2.60388	2.06608e-07	1.93342e-05	up	Hypothetical conserved gene.
Os03g0775700	2.00554	3.21806e-07	2.69846e-05	up	Conserved hypothetical protein.
Os03g0785900	2.62813	9.35344e-08	1.06105e-05	up	Glutathione-S-transferase.
Os03g0790500	4.14811	1.80884e-06	0.000101575	up	Alpha/beta hydrolase fold-3 domain containing protein.
Os03g0790700	2.16657	4.50014e-07	3.47129e-05	up	Aldehyde oxidase-2.
Os03g0792800	3.29753	1.7699e-07	1.71904e-05	up	Beta-C3-glucanase-like protein.
Os03g0792800	3.86627	1.28819e-06	7.77492e-05	up	Beta-C3-glucanase-like protein.
Os03g0793700	373.4	3.82897e-09	7.62171e-07	up	RmlC-like jelly roll fold domain containing protein.
Os03g0793700	132.6	4.20233e-09	8.24839e-07	up	RmlC-like jelly roll fold domain containing protein.
Os03g0796000	2.43556	1.52102e-06	8.82616e-05	up	Ripening-associated protein (Fragment).
Os03g0796301	15.1593	2.09214e-07	1.94789e-05	up	WW domain-binding protein 11.
Os03g0796900	2.47424	9.77786e-06	0.000406488	up	bZIP transcription factor Globulin gene promoter in endosperm
Os03g0803700	2.63372	1.59063e-07	1.58608e-05	up	Hypothetical conserved gene.
Os03g0803800	2.04877	1.27236e-06	7.7113e-05	up	Conserved hypothetical protein.
Os03g0803800	2.49795	2.29371e-06	0.000122847	up	Conserved hypothetical protein.
Os03g0806600	4.81201	1.17415e-07	1.25421e-05	up	Conserved hypothetical protein.
Os03g0806600	2.94173	1.11299e-07	1.20718e-05	up	Conserved hypothetical protein.
Os03g0807900	2.1891	6.75123e-06	0.000297607	up	Chaperonin-like RbcX family protein.
Os03g0808200	14.72	2.59779e-06	0.000135495	up	UDP-glucuronosyl/UDP-glucosyltransferase family protein.
Os03g0810900	2.69738	2.45694e-06	0.000130003	up	ARF/SAR superfamily domain containing protein.
Os03g0817200	2.26131	5.89542e-07	4.27534e-05	up	Amino acid transporter transmembrane domain containing protein.
Os03g0817200	2.01127	9.71203e-06	0.000404348	up	Amino acid transporter transmembrane domain containing protein.
Os03g0818100	5.26282	6.1163e-06	0.000274542	up	Multiple inositol polyphosphate phosphatase PhyIIa2.
Os03g0818100	2.7788	2.04777e-06	0.000112241	up	Multiple inositol polyphosphate phosphatase PhyIIa2.
Os03g0818100	3.46462	4.40475e-08	5.85256e-06	up	Multiple inositol polyphosphate phosphatase PhyIIa2.
Os03g0818100	3.01101	6.44878e-09	1.18904e-06	up	Multiple inositol polyphosphate phosphatase PhyIIa2.
Os03g0818100	2.44402	2.97128e-06	0.000150862	up	Multiple inositol polyphosphate phosphatase PhyIIa2.
Os03g0820300	5.78228	1.38201e-06	8.20761e-05	up	TFIIIA-type zinc finger protein Transcription activator Abiotic stress tolerance
Os03g0820400	9.20466	4.24475e-07	3.31665e-05	up	ZPT2-13.
Os03g0820500	3.96227	2.54999e-07	2.26494e-05	up	WCOR719.
Os03g0826100	2.09196	1.595e-07	1.58895e-05	up	Hypothetical protein.
Os03g0826800	3.38396	1.76526e-06	9.94448e-05	up	Conserved hypothetical protein.
Os03g0828300	4.26322	1.63684e-06	9.36959e-05	up	(1-4)-beta-mannan endohydrolase-like protein.
Os03g0829200	2.08896	1.68874e-06	9.60299e-05	up	epoxide hydrolase 2.
Os03g0838500	60.1	6.54752e-06	0.000290021	up	Peptidase S8 subtilisin-related domain containing protein.
Os03g0844700	2.46463	4.85401e-07	3.68112e-05	up	ALBINO3-like protein C chloroplastic.
Os04g0110300	2.24269	2.8895e-06	0.000147578	up	Myb DNA-binding domain containing protein.
Os04g0112533	3.36157	2.94578e-06	0.000149873	up	Conserved hypothetical protein.
Os04g0167875	5.38206	7.1569e-07	4.94342e-05	up	Protein phosphatase 2C-like domain containing protein.
Os04g0167900	3.09646	2.072e-06	0.000113298	up	Protein phosphatase 2C-like domain containing protein.
Os04g0185600	2.06744	1.60972e-06	9.24314e-05	up	General substrate transporter domain containing protein.
Os04g0197350	20.6027	1.99576e-07	1.88429e-05	up	Hypothetical conserved gene.
Os04g0197350	11.625	8.35242e-06	0.000356663	up	Hypothetical conserved gene.
Os04g0203450	4.77439	2.83409e-07	2.44885e-05	up	Hypothetical protein.
Os04g0204000	5.95469	1.98221e-07	1.87443e-05	up	H0825G02.2 protein.
Os04g0204000	11.7886	1.25739e-07	1.32176e-05	up	H0825G02.2 protein.
Os04g0204000	67.7	1.64716e-06	9.41468e-05	up	H0825G02.2 protein.
Os04g0206350	6.92971	3.56972e-08	4.93862e-06	up	Hypothetical protein.
Os04g0206401	7.22164	1.69151e-08	2.69158e-06	up	Hypothetical gene.
Os04g0206500	8.38688	4.17056e-07	3.2732e-05	up	UDP-glucuronosyl/UDP-glucosyltransferase family protein.
Os04g0206500	6.19645	1.34178e-07	1.38872e-05	up	UDP-glucuronosyl/UDP-glucosyltransferase family protein.
Os04g0206500	9.74654	1.33292e-07	1.3817e-05	up	UDP-glucuronosyl/UDP-glucosyltransferase family protein.
Os04g0209200	10.6667	8.94564e-06	0.000377571	up	MRP-like ABC transporter.
Os04g0209200	3.72466	1.73203e-06	9.78726e-05	up	MRP-like ABC transporter.
Os04g0210250	3.66364	4.44447e-08	5.89423e-06	up	Hypothetical gene.
Os04g0223500	3.36814	4.53597e-08	5.98927e-06	up	H0515C11.3 protein.
Os04g0234402	8.21795	7.18206e-07	4.95756e-05	up	hydrolase acting on ester bonds.
Os04g0266400	4.31749	2.4953e-10	9.35404e-08	up	cDNA clone:001-201-C0C full insert sequence.
Os04g0266900	6.07843	1.25418e-07	1.31881e-05	up	Transketolase C-terminal-like domain containing protein.
Os04g0266900	3.93531	4.25397e-07	3.32262e-05	up	Transketolase C-terminal-like domain containing protein.
Os04g0295500	5.76675	2.21245e-10	8.85903e-08	up	Conserved hypothetical protein.
Os04g0301500	3.24037	1.41084e-06	8.34719e-05	up	Helix-loop-helix DNA-binding domain containing protein.
Os04g0307500	2.04508	2.33769e-06	0.000124871	up	OSIGBa0113B06.2 protein.
Os04g0310400	2.32749	3.44198e-06	0.000170223	up	H0211A12.15 protein.
Os04g0316200	98.5	1.2852e-07	1.34331e-05	up	Protein of unknown function DUF26 domain containing protein.
Os04g0322100	2.59408	7.0276e-06	0.000307928	up	Protein of unknown function DUF26 domain containing protein.
Os04g0344100	4.76586	2.56673e-06	0.000134222	up	OSIGBa0106G08.3 protein.
Os04g0344100	2.46663	6.61215e-06	0.000292159	up	OSIGBa0106G08.3 protein.
Os04g0344100	3.69202	1.06444e-07	1.16649e-05	up	OSIGBa0106G08.3 protein.
Os04g0348400	2.68222	2.37963e-10	9.11306e-08	up	OSIGBa0130K07.9 protein.
Os04g0352400	4.02645	1.36663e-09	3.19225e-07	up	Peptidyl-prolyl cis-trans isomerase FKBP-type domain containing protein.
Os04g0352400	3.47235	3.59605e-10	1.19276e-07	up	Peptidyl-prolyl cis-trans isomerase FKBP-type domain containing protein.
Os04g0352400	2.6274	9.8827e-07	6.32789e-05	up	Peptidyl-prolyl cis-trans isomerase FKBP-type domain containing protein.
Os04g0386700	6.59123	9.79684e-07	6.28427e-05	up	OSIGBa0148P16.6 protein.
Os04g0390700	15.8841	3.03806e-08	4.35854e-06	up	Short-chain dehydrogenase/reductase SDR domain containing protein.
Os04g0390800	276.5	3.30326e-09	6.75331e-07	up	NAD(P)-binding domain containing protein.
Os04g0394100	3.8238	1.08925e-07	1.18816e-05	up	H0718E12.3 protein.
Os04g0395800	14.775	6.22807e-08	7.70156e-06	up	Tify domain containing protein.
Os04g0405800	3.22727	3.08747e-06	0.000155528	up	OSIGBa0142C11.1 protein.
Os04g0414300	2.39835	5.59733e-09	1.05553e-06	up	H0622F05.1 protein.
Os04g0414500	3.04443	1.94042e-06	0.000107564	up	H0622F05.2 protein.
Os04g0415000	5.90714	7.79142e-07	5.26135e-05	up	H0622F05.5 protein.
Os04g0415800	8.64219	1.71627e-07	1.67813e-05	up	OSIGBa0092M08.2 protein.
Os04g0419100	2.96573	5.22385e-07	3.89317e-05	up	Conserved hypothetical protein.
Os04g0429050	118.2	5.39892e-09	1.02267e-06	up	OSIGBa0093L02.1 protein.
Os04g0429050	4.52126	1.6619e-07	1.63555e-05	up	OSIGBa0093L02.1 protein.
Os04g0434400	103.4	6.46744e-08	7.9326e-06	up	H0823A09.7 protein.
Os04g0434400	10.7467	5.08819e-08	6.57469e-06	up	H0823A09.7 protein.
Os04g0435100	2.31977	1.33161e-06	7.98351e-05	up	Amino acid/polyamine transporter I family protein.
Os04g0435100	2.90125	1.51893e-07	1.52866e-05	up	Amino acid/polyamine transporter I family protein.
Os04g0435200	2.14227	2.08622e-06	0.000113914	up	Hypothetical protein.
Os04g0439200	8.71329	7.40934e-07	5.06319e-05	up	T-complex 11 family protein.
Os04g0443400	75.7	3.47822e-06	0.000171714	up	Hypothetical protein.
Os04g0448500	5.76868	1.35575e-06	8.08003e-05	up	Peptidase A1 domain containing protein.
Os04g0449100	3.75301	3.9977e-07	3.17466e-05	up	Xyloglucan fucosyltransferase family protein.
Os04g0449200	13.0133	1.82895e-08	2.86499e-06	up	Xyloglucan fucosyltransferase family protein.
Os04g0460350	4.22126	6.85499e-07	4.78887e-05	up	predicted protein.
Os04g0460350	4.96491	1.83097e-07	1.76296e-05	up	predicted protein.
Os04g0460400	132.6	4.09929e-09	8.0799e-07	up	Uncharacterised protein family UPF0497 trans-membrane plant subgroup domain containing protein.
Os04g0465800	2.16911	1.95986e-06	0.000108415	up	OSIGBa0115M15.1 protein.
Os04g0469500	2.30681	7.77121e-08	9.2311e-06	up	OSIGBa0124N08.2 protein.
Os04g0469500	3.12533	2.52203e-08	3.7335e-06	up	OSIGBa0124N08.2 protein.
Os04g0475400	127.4	3.70503e-09	7.43098e-07	up	OSIGBa0106G07.6 protein.
Os04g0479200	3.85274	9.88714e-09	1.71631e-06	up	NAD-dependent isocitrate dehydrogenase c%3B1.
Os04g0480300	2.27967	8.72643e-09	1.54889e-06	up	Myb DNA-binding domain containing protein.
Os04g0485800	2.3446	1.94294e-06	0.000107661	up	Cyclin-like F-box domain containing protein.
Os04g0488100	81.6	3.44024e-07	2.83749e-05	up	Rad21/Rec8 like protein C-terminal domain containing protein.
Os04g0493400	3.602	5.75221e-07	4.19524e-05	up	Chitinase.
Os04g0493600	2.2506	1.55278e-09	3.5525e-07	up	Lectin-C precursor (PL-C).
Os04g0496400	2.8039	6.35314e-10	1.73293e-07	up	RNA recognition motif RNP-1 domain containing protein.
Os04g0497000	15.597	7.84566e-08	9.2941e-06	up	Allyl alcohol dehydrogenase.
Os04g0497000	3.53091	2.18686e-07	2.01471e-05	up	Allyl alcohol dehydrogenase.
Os04g0497000	3.19498	3.51726e-07	2.88517e-05	up	Allyl alcohol dehydrogenase.
Os04g0506900	2.98675	1.61395e-07	1.60254e-05	up	OSIGBa0157A06.2 protein.
Os04g0508800	2.00188	4.97782e-06	0.00023145	up	Retroelement pol polyprotein-like.
Os04g0508800	2.04624	6.12339e-07	4.39618e-05	up	Retroelement pol polyprotein-like.
Os04g0510200	2.04912	7.79714e-07	5.26437e-05	up	STYLOSA protein.
Os04g0511200	6.07964	1.36071e-06	8.10501e-05	up	EFA27 for EF hand abscisic acid 27kD.
Os04g0513550	2.14952	3.6593e-07	2.97465e-05	up	Hypothetical protein.
Os04g0518000	4.21146	5.19718e-06	0.000239646	up	Adenosine kinase (Fragment).
Os04g0522500	14.975	3.04772e-07	2.589e-05	up	2OG-Fe(II) oxygenase domain containing protein.
Os04g0527400	2.40572	6.81761e-07	4.76905e-05	up	BRO1 domain containing protein.
Os04g0527400	6.00402	6.59867e-08	8.05617e-06	up	BRO1 domain containing protein.
Os04g0527400	14.0803	2.14128e-08	3.26503e-06	up	BRO1 domain containing protein.
Os04g0527700	2.85307	8.12577e-07	5.43161e-05	up	CHCH domain containing protein.
Os04g0528000	106.8	2.62842e-08	3.86261e-06	up	OSIGBa0115K01-H0319F09.15 protein.
Os04g0538000	3.67775	1.57303e-08	2.5326e-06	up	Hypothetical gene.
Os04g0542302	5.92633	5.21079e-07	3.88709e-05	up	TCP-domain protein.
Os04g0543000	10.4686	1.67395e-10	7.64288e-08	up	Protein kinase.
Os04g0543000	7.1355	6.48116e-08	7.94712e-06	up	Protein kinase.
Os04g0543600	3.52803	6.4156e-07	4.55186e-05	up	Amino acid/polyamine transporter I family protein.
Os04g0548400	2.10958	1.06816e-11	4.17983e-08	up	Protein kinase core domain containing protein.
Os04g0564700	2.11865	1.16303e-06	7.18404e-05	up	OSIGBa0158F05.3 protein.
Os04g0569100	2.07687	7.22799e-07	4.97626e-05	up	OCL1 homeobox protein.
Os04g0583266	3.35616	1.82614e-07	1.76031e-05	up	Hypothetical protein.
Os04g0583900	4.85606	8.97822e-08	1.02898e-05	up	LHY protein.
Os04g0583900	7.95653	6.50748e-07	4.60237e-05	up	LHY protein.
Os04g0583900	5.94815	2.92936e-07	2.51201e-05	up	LHY protein.
Os04g0589800	6.14051	1.19439e-06	7.33532e-05	up	Late embryogenesis abundant (LEA) group 1 family protein.
Os04g0596200	104.3	5.06396e-08	6.55539e-06	up	Peptidase A1 domain containing protein.
Os04g0600200	2.52719	2.11856e-06	0.000115352	up	Homodimeric diiron-carboxylate protein Cyanide-resistant respiration in mitochondria Reactive oxygen species (ROS) scavenging
Os04g0602300	2.00289	3.56267e-11	4.40651e-08	up	B0403H10-OSIGBa0105A11.17 protein.
Os04g0602800	2.16784	9.76254e-07	6.26991e-05	up	B0403H10-OSIGBa0105A11.22 protein.
Os04g0605500	2.24224	1.66404e-06	9.4983e-05	up	P-type ATPase (Fragment).
Os04g0607100	6.01596	1.41673e-06	8.37285e-05	up	OSIGBa0113I13.9 protein.
Os04g0607150	31.245	1.90854e-08	2.96659e-06	up	OSIGBa0113I13.10 protein.
Os04g0607150	4.12043	1.04906e-07	1.15383e-05	up	OSIGBa0113I13.10 protein.
Os04g0607150	6.62468	6.19969e-08	7.67321e-06	up	OSIGBa0113I13.10 protein.
Os04g0610400	2.39149	3.30998e-06	0.000164891	up	APETALA-2-like transcription Factor Control of the abscisic acid (ABA)/gibberellin (GA) balance
Os04g0610600	9.72627	1.89748e-06	0.000105571	up	Cor14b protein precursor.
Os04g0614600	2.3226	3.89122e-06	0.000187933	up	OSIGBa0126B18.7 protein.
Os04g0615100	2.25728	3.87628e-06	0.00018734	up	Lecithine cholesterol acyltransferase-like protein.
Os04g0623300	2.44274	2.33973e-06	0.000124956	up	H0215F08.3 protein.
Os04g0623300	2.72513	7.24301e-06	0.000316194	up	H0215F08.3 protein.
Os04g0623300	3.45852	8.12695e-08	9.54945e-06	up	H0215F08.3 protein.
Os04g0635000	2.76014	4.77311e-07	3.63411e-05	up	H0315F07.10 protein.
Os04g0636100	2.79747	1.64949e-06	9.42673e-05	up	Glycosyl transferase family 8 protein.
Os04g0650000	2.67006	1.64151e-06	9.39365e-05	up	cDNA clone:J013002H09 full insert sequence.
Os04g0652550	2.93639	1.05387e-09	2.57071e-07	up	Hypothetical protein.
Os04g0652600	2.5535	2.18774e-07	2.01471e-05	up	OSIGBa0113E10.15 protein.
Os04g0652700	2.20167	6.48534e-07	4.59132e-05	up	nuclease PA3.
Os04g0669300	5.22251	4.62374e-08	6.08994e-06	up	EF hand domain containing protein.
Os04g0674400	2.35496	1.85466e-06	0.00010379	up	Anamorsin (Cytokine induced apoptosis inhibitor 1) (CUA001). Splice isoform 2.
Os04g0674700	2.09821	6.7929e-06	0.000299195	up	AMP-binding protein (Adenosine monophosphate binding protein 5 AMPBP5).
Os04g0691900	2.70379	3.24479e-06	0.000162023	up	Chaperonin Cpn60/TCP-1 family protein.
Os04g0691900	2.94277	2.26833e-07	2.06848e-05	up	Chaperonin Cpn60/TCP-1 family protein.
Os05g0105600	2.10951	1.01903e-07	1.1314e-05	up	YT521-B-like protein family protein.
Os05g0114100	81.2	5.27e-08	6.76167e-06	up	endonuclease/exonuclease/phosphatase family protein.
Os05g0115100	3.51237	2.1836e-06	0.000118178	up	Protein of unknown function DUF1635 family protein.
Os05g0115100	3.00657	3.53491e-06	0.00017389	up	Protein of unknown function DUF1635 family protein.
Os05g0116100	2.13082	5.56675e-07	4.08534e-05	up	Dehydroascorbate reductase.
Os05g0119100	7.92917	4.13266e-08	5.55673e-06	up	Hypothetical protein.
Os05g0119200	2.27686	2.05671e-06	0.000112637	up	EST C27893 corresponds to a region of the predicated gene.
Os05g0119200	2.86195	9.39008e-07	6.08528e-05	up	EST C27893 corresponds to a region of the predicated gene.
Os05g0125500	2.44022	6.23905e-07	4.45801e-05	up	Isovaleryl-CoA dehydrogenase mitochondrial precursor (EC 1.3.99.10) (IVD).
Os05g0129000	4.24738	8.44992e-08	9.85256e-06	up	cDNA clone:J033125H02 full insert sequence.
Os05g0129900	2.01748	2.81061e-07	2.4325e-05	up	Tetratricopeptide-like helical domain containing protein.
Os05g0130100	10.4104	1.30778e-08	2.17133e-06	up	Hypothetical conserved gene.
Os05g0132700	12.5542	3.47252e-06	0.000171512	up	R2R3 Myb-like protein.
Os05g0132700	6.04167	6.01948e-08	7.5051e-06	up	R2R3 Myb-like protein.
Os05g0133900	2.03245	9.40716e-06	0.000393866	up	DNA methyl transferase 106.
Os05g0138300	3.82872	2.9931e-07	2.55441e-05	up	ICT protein (Fragment).
Os05g0138300	2.68038	1.5757e-06	9.07735e-05	up	ICT protein (Fragment).
Os05g0143700	98.8	6.13486e-08	7.61528e-06	up	Hypothetical conserved gene.
Os05g0144300	2.3504	3.96953e-07	3.16059e-05	up	DEAD-like helicase N-terminal domain containing protein.
Os05g0148950	6.42579	5.05208e-06	0.000234079	up	Hypothetical protein.
Os05g0151200	6.20603	2.76913e-07	2.41123e-05	up	TspO/MBR-related protein family protein.
Os05g0155800	42.0263	5.19041e-09	9.87159e-07	up	OSIGBa0157A06.5 protein.
Os05g0155800	6.10167	8.71422e-07	5.73429e-05	up	OSIGBa0157A06.5 protein.
Os05g0163700	2.40841	2.25952e-06	0.000121308	up	Acyl-coenzyme A oxidase 4 peroxisomal (EC 1.3.3.6) (AOX 4) (Short- chain acyl-CoA oxidase) (SAOX) (AtCX4) (G6p) (AtG6).
Os05g0170200	7.23154	2.65053e-07	2.33545e-05	up	universal stress protein family protein.
Os05g0170200	14.4646	2.91525e-07	2.50368e-05	up	universal stress protein family protein.
Os05g0171200	3.42532	4.23578e-07	3.31075e-05	up	Embryo-specific 3 family protein.
Os05g0171900	5.76676	1.73884e-07	1.69471e-05	up	Lactoylglutathione lyase.
Os05g0171900	3.43234	2.70227e-06	0.00013975	up	Lactoylglutathione lyase.
Os05g0172000	3.97509	6.34842e-07	4.51982e-05	up	Conserved hypothetical protein.
Os05g0172000	4.04809	5.91005e-06	0.0002667	up	Conserved hypothetical protein.
Os05g0194500	3.02251	4.27859e-08	5.71907e-06	up	ANAC075.
Os05g0194500	2.82584	2.51273e-07	2.23909e-05	up	ANAC075.
Os05g0194500	3.57181	1.79283e-08	2.81782e-06	up	ANAC075.
Os05g0195700	3.03296	9.04458e-12	4.17983e-08	up	Transcription factor MYBS2.
Os05g0206100	17.781	5.34036e-08	6.83369e-06	up	Conserved hypothetical protein.
Os05g0241100	3.71617	6.00133e-07	4.33357e-05	up	predicted protein.
Os05g0244700	3.69176	6.64177e-07	4.67701e-05	up	Aminotransferase class IV family protein.
Os05g0247800	2.44072	1.73723e-06	9.80619e-05	up	Glycoside hydrolase family 18 protein.
Os05g0283000	4.32787	6.07963e-07	4.37665e-05	up	Conserved hypothetical protein.
Os05g0296800	3.17402	6.31211e-06	0.000281746	up	Conserved hypothetical protein.
Os05g0304800	5.41667	5.42725e-08	6.90517e-06	up	Histone-fold domain containing protein.
Os05g0324700	2.25859	1.25269e-06	7.61722e-05	up	Conserved hypothetical protein.
Os05g0334000	2.3736	4.31053e-07	3.35749e-05	up	Heat shock protein DnaJ family protein.
Os05g0341600	3.38289	6.17766e-06	0.000276534	up	Ras-related protein Rab-21.
Os05g0358700	2.26673	3.84042e-07	3.08394e-05	up	predicted protein.
Os05g0359500	3.6367	7.35057e-06	0.000319859	up	Zinc finger RING-type domain containing protein.
Os05g0364500	2.97249	3.90667e-10	1.23816e-07	up	Heat shock protein DnaJ N-terminal domain containing protein.
Os05g0373900	4.47763	4.16189e-07	3.27015e-05	up	Eukaryotic peptide chain release factor subunit 1 (eRF1) (Eukaryotic release factor 1) (TB3-1) (Cl1 protein).
Os05g0373900	6.66063	1.8454e-08	2.88435e-06	up	Eukaryotic peptide chain release factor subunit 1 (eRF1) (Eukaryotic release factor 1) (TB3-1) (Cl1 protein).
Os05g0380900	2.32736	1.56102e-06	9.016e-05	up	Polcalcin Jun o 2 (Calcium-binding pollen allergen Jun o 2).
Os05g0381400	11.4044	6.46906e-07	4.58133e-05	up	AWPM-19-like protein Stress tolerance through ABA-dependent patheway
Os05g0381700	2.29612	2.60783e-07	2.3071e-05	up	calmodulin-binding protein-related.
Os05g0381700	2.01802	2.81931e-07	2.43807e-05	up	calmodulin-binding protein-related.
Os05g0382000	60.8	6.54758e-06	0.000290021	up	ABL164Cp.
Os05g0392100	2.46152	3.39815e-06	0.000168331	up	glycine-rich protein.
Os05g0410500	4.8719	1.2525e-07	1.3176e-05	up	TGF-beta receptor type I/II extracellular region family protein.
Os05g0414700	2.4186	8.66929e-06	0.000367779	up	BRASSINOSTEROID INSENSITIVE 1-associated receptor kinase 1.
Os05g0421600	2.5681	6.41641e-06	0.000285424	up	No apical meristem (NAM) protein domain containing protein.
Os05g0421900	2.03629	1.6779e-07	1.64747e-05	up	GA 20-oxidase4 GA metabolism
Os05g0438800	3.31599	6.75649e-07	4.73806e-05	up	Actin 1.
Os05g0438800	3.09069	5.42668e-07	4.0097e-05	up	Actin 1.
Os05g0438800	2.09815	1.28237e-06	7.75311e-05	up	Actin 1.
Os05g0438800	3.0369	1.45005e-06	8.51731e-05	up	Actin 1.
Os05g0438800	2.45682	2.56597e-07	2.27531e-05	up	Actin 1.
Os05g0442400	5.34264	6.28123e-09	1.16017e-06	up	R-R-type MYB-like transcription factor Response to drought stress during reproductive development
Os05g0460000	2.09065	8.77794e-06	0.000371457	up	70 kDa heat shock cognate protein 1.
Os05g0461600	2.20668	9.93505e-07	6.35179e-05	up	SIK1 protein (Nucleolar protein NOP56).
Os05g0462400	2.32241	5.55701e-06	0.000253528	up	Lipin N-terminal conserved region domain containing protein.
Os05g0463900	2.40794	4.68996e-11	4.778e-08	up	HECT domain containing protein.
Os05g0468800	3.33015	7.95554e-07	5.34147e-05	up	Phosphatidylethanolamine-binding protein PEBP domain containing protein.
Os05g0471000	2.01347	8.18296e-06	0.000350524	up	Ser-thr protein kinase (Fragment).
Os05g0471116	2.01386	1.57338e-06	9.07142e-05	up	Hypothetical protein.
Os05g0474600	2.49155	7.71126e-07	5.22057e-05	up	Aldose reductase-related protein (EC 1.1.1.21).
Os05g0474600	2.08988	5.90222e-06	0.000266375	up	Aldose reductase-related protein (EC 1.1.1.21).
Os05g0474600	2.24783	2.19244e-06	0.000118429	up	Aldose reductase-related protein (EC 1.1.1.21).
Os05g0474600	3.08793	5.31356e-08	6.80764e-06	up	Aldose reductase-related protein (EC 1.1.1.21).
Os05g0475300	2.57747	8.91163e-06	0.000376361	up	VHS domain containing protein.
Os05g0475400	4.36445	7.74171e-08	9.20449e-06	up	Aminotransferase Regulation of abiotic stress responses
Os05g0477900	2.03197	2.50701e-06	0.000131874	up	nonspecific lipid-transfer protein.
Os05g0490200	2.33209	1.21195e-07	1.28647e-05	up	cDNA clone:J033072O04 full insert sequence.
Os05g0494600	4.98046	7.55684e-07	5.13907e-05	up	Circadian clock coupling factor ZGT.
Os05g0498400	2.12259	7.49359e-06	0.000324978	up	Protein translation factor SUI1.
Os05g0498851	2.61864	1.67886e-07	1.64802e-05	up	Hypothetical protein.
Os05g0508400	2.15366	5.35316e-07	3.96785e-05	up	Mannose-binding lectin domain containing protein.
Os05g0508750	2.7418	1.09552e-07	1.19314e-05	up	Hypothetical protein.
Os05g0515200	5.29156	8.06743e-07	5.40253e-05	up	Cytochrome P450 family protein.
Os05g0515200	7.27104	1.03757e-07	1.14566e-05	up	Cytochrome P450 family protein.
Os05g0515700	2.25914	1.59143e-06	9.15054e-05	up	Target protein of bacterial effector Xoo virulence
Os05g0519800	11.2125	8.91649e-06	0.000376528	up	Integrase N-terminal zinc-binding domain-like domain containing protein.
Os05g0524100	3.17406	1.20444e-06	7.38433e-05	up	Conserved hypothetical protein.
Os05g0524100	2.96633	6.95335e-07	4.83759e-05	up	Conserved hypothetical protein.
Os05g0524500	3.41777	1.42641e-06	8.41455e-05	up	Protein kinase core domain containing protein.
Os05g0525900	2.78031	2.43882e-07	2.1864e-05	up	Zing finger transcription factor PEI1.
Os05g0528900	5.75601	6.77366e-06	0.000298503	up	Ribosomal protein L9 family protein.
Os05g0529200	3.77448	9.10615e-07	5.93859e-05	up	Crotonase core domain containing protein.
Os05g0529400	2.11934	1.0697e-06	6.7143e-05	up	ubiquitin domain containing 1.
Os05g0537100	2.19865	4.15733e-07	3.26828e-05	up	WRKY transcription factor 10.
Os05g0537300	3.19211	9.74589e-08	1.09238e-05	up	Unconventional myosin heavy chain.
Os05g0541400	5.80697	1.43605e-07	1.4669e-05	up	Helix-loop-helix DNA-binding domain containing protein.
Os05g0542200	2.9611	3.00841e-06	0.000152444	up	cDNA clone:J023112L03 full insert sequence.
Os05g0542500	17.9007	1.78663e-07	1.73051e-05	up	LEA-like protein.
Os05g0542600	21.3937	2.31373e-07	2.09964e-05	up	Mov34/MPN/PAD-1 family protein.
Os05g0545400	2.48108	7.47617e-07	5.09815e-05	up	Serine/threonine protein kinase domain containing protein.
Os05g0550000	2.40923	5.1811e-06	0.000239061	up	protein binding protein.
Os05g0550000	2.04389	5.9548e-06	0.000268404	up	protein binding protein.
Os05g0550200	3.8957	7.93761e-07	5.33451e-05	up	Hypothetical protein.
Os05g0550250	3.73995	1.71045e-06	9.69905e-05	up	seed maturation protein.
Os05g0550300	3.38458	9.40786e-08	1.0652e-05	up	Lipid transfer protein (Fragment).
Os05g0554400	6.10455	8.49076e-06	0.00036173	up	Phosphatidylserine synthase 2.
Os05g0557200	2.05942	2.0301e-06	0.000111425	up	Armadillo-type fold domain containing protein.
Os05g0559400	2.44486	2.55937e-08	3.78084e-06	up	IAA11 (Fragment).
Os05g0560200	3.09572	1.88761e-06	0.000105133	up	tumor-related protein-like.
Os05g0562400	2.67461	8.1718e-06	0.000350117	up	Hypothetical conserved gene.
Os05g0567700	11.5524	3.30531e-08	4.65043e-06	up	Integral membrane protein.
Os05g0568100	2.08669	2.78327e-06	0.000143156	up	Iron sulfur cluster assembly protein C
Os05g0568100	2.05143	4.89799e-06	0.00022829	up	Iron sulfur cluster assembly protein C
Os05g0568100	2.21524	5.76547e-06	0.000261459	up	Iron sulfur cluster assembly protein C
Os05g0569300	2.38589	3.05667e-06	0.000154238	up	G-box binding factor 1.
Os05g0572000	2.0822	6.20364e-06	0.000277461	up	Pathogenesis-related transcriptional factor and ERF domain containing protein.
Os05g0572700	6.91174	5.02619e-07	3.77677e-05	up	Protein phosphatase 2C.
Os05g0572700	15.5469	1.8707e-07	1.79427e-05	up	Protein phosphatase 2C.
Os05g0572800	12.4202	7.31586e-08	8.77861e-06	up	Hypothetical protein.
Os05g0573300	3.30212	3.27009e-06	0.000163076	up	CTP synthase 1 (EC 6.3.4.2)
Os05g0573300	2.82445	3.38832e-06	0.00016796	up	CTP synthase 1 (EC 6.3.4.2)
Os05g0573400	3.21178	1.21823e-06	7.44624e-05	up	Hypothetical protein.
Os05g0574100	3.38964	2.52758e-08	3.73911e-06	up	Lipase class 3 family protein.
Os05g0574600	2.59243	6.44453e-06	0.000286357	up	3-ketoacyl-CoA synthase.
Os05g0575000	3.3153	1.22866e-06	7.49266e-05	up	predicted protein.
Os05g0575000	11.2007	1.51106e-08	2.44587e-06	up	predicted protein.
Os05g0581300	7.39865	3.58128e-08	4.9502e-06	up	Hypothetical conserved gene.
Os05g0582500	3.76273	4.77237e-06	0.00022347	up	Peptidase S10 serine carboxypeptidase domain containing protein.
Os05g0583000	3.19212	1.32869e-06	7.9716e-05	up	WRKY8.
Os05g0583000	4.00567	2.22289e-07	2.04042e-05	up	WRKY8.
Os05g0588800	4.59296	1.19547e-06	7.33788e-05	up	Hypothetical gene.
Os05g0588900	5.01862	4.72699e-07	3.60484e-05	up	mitochondrial chaperone BCS1.
Os05g0595100	2.84627	7.1149e-06	0.000311366	up	Uridine-diphospho-(UDP)-glucose 4-epimerase Cell wall carbohydrate partitioning during nitrogen (N) limitation
Os05g0595200	6.79332	1.9345e-07	1.84027e-05	up	allergen V5/Tpx-1-related family protein.
Os06g0103300	2.25321	3.82221e-06	0.000185256	up	Homogentisate C2-dioxygenase.
Os06g0105400	2.09215	6.56464e-07	4.62886e-05	up	Dihydrolipoamide S-acetyltransferase (EC 2.3.1.12).
Os06g0105400	2.92364	2.23559e-09	4.82326e-07	up	Dihydrolipoamide S-acetyltransferase (EC 2.3.1.12).
Os06g0107000	2.01063	5.39001e-07	3.98747e-05	up	Domain of unknown function DUF862 eukaryotic domain containing protein.
Os06g0110200	11.287	3.25532e-08	4.59845e-06	up	Late embryogenesis abundant (LEA) group 1 family protein.
Os06g0114500	2.02404	3.89023e-08	5.2971e-06	up	ATOZI1 protein (Stress-induced protein OZI1) (AT0ZI1 protein).
Os06g0116933	8.78404	7.77739e-08	9.23393e-06	up	Conserved hypothetical protein.
Os06g0122800	3.83727	5.54539e-06	0.000253108	up	Hypothetical conserved gene.
Os06g0126050	2.08672	4.47642e-06	0.000211533	up	Hypothetical protein.
Os06g0127100	8.52341	1.30175e-06	7.84223e-05	up	Dehydration-responsive element-binding protein 1C.
Os06g0133300	13.175	1.55039e-06	8.97441e-05	up	Hypothetical conserved gene.
Os06g0133400	5.68579	3.99907e-07	3.17515e-05	up	Conserved hypothetical protein.
Os06g0133500	4.21389	1.7371e-06	9.80619e-05	up	Conserved hypothetical protein.
Os06g0134800	4.35469	2.16711e-06	0.000117469	up	Folate-binding YgfZ domain containing protein.
Os06g0134800	4.26708	9.86958e-08	1.10274e-05	up	Folate-binding YgfZ domain containing protein.
Os06g0136201	120.4	1.03606e-09	2.54377e-07	up	Hypothetical gene.
Os06g0136201	6.04071	9.39948e-08	1.06456e-05	up	Hypothetical gene.
Os06g0140800	2.18563	5.74285e-08	7.22625e-06	up	Serine threonine kinase.
Os06g0142200	8.65359	9.79822e-07	6.28427e-05	up	cDNA clone:J033147G13 full insert sequence.
Os06g0160700	2.10866	1.6335e-10	7.53962e-08	up	Starch synthase Starch biosynthesis
Os06g0160700	2.4427	6.73174e-07	4.72473e-05	up	Starch synthase Starch biosynthesis
Os06g0172800	2.26065	4.02654e-07	3.19276e-05	up	alkaline alpha galactosidase 2.
Os06g0177300	3.3617	4.71429e-07	3.59775e-05	up	Glycosyl transferase family 31 protein.
Os06g0179200	2.08549	1.39278e-07	1.431e-05	up	Nodulin-like protein.
Os06g0181200	2.83715	1.13654e-08	1.93523e-06	up	Serine/threonine protein kinase domain containing protein.
Os06g0181200	2.75386	1.20228e-07	1.27877e-05	up	Serine/threonine protein kinase domain containing protein.
Os06g0183800	2.02034	1.28766e-06	7.77286e-05	up	Chromatin-remodeling factor CHD3.
Os06g0195800	2.07939	2.70072e-06	0.000139701	up	DNAJ heat shock N-terminal domain-containing protein.
Os06g0203600	2.79123	7.63678e-07	5.18176e-05	up	Chalcone isomerase domain containing protein.
Os06g0204600	4.65088	1.11351e-07	1.20744e-05	up	Conserved hypothetical protein.
Os06g0207200	3.49869	3.15762e-06	0.000158345	up	Conserved hypothetical protein.
Os06g0218300	2.60807	2.06956e-06	0.000113253	up	Zinc finger RING-type domain containing protein.
Os06g0227500	7.78094	1.61826e-07	1.60508e-05	up	Glutathione S-transferase.
Os06g0229000	2.01399	1.20084e-08	2.02675e-06	up	FtsH protease (VAR2) (Zinc dependent protease).
Os06g0229066	2.05778	2.56452e-06	0.000134124	up	ATP-dependent zinc metalloprotease FTSH 6 chloroplastic.
Os06g0239200	2.29725	5.93081e-10	1.65292e-07	up	Conserved hypothetical protein.
Os06g0244000	3.11509	7.14587e-08	8.61232e-06	up	anthranilic acid methyltransferase 3.
Os06g0244000	3.53128	9.65519e-07	6.21422e-05	up	anthranilic acid methyltransferase 3.
Os06g0246500	6.97986	1.20913e-07	1.28444e-05	up	Pyruvate dehydrogenase E1 alpha subunit (EC 1.2.4.1).
Os06g0246500	6.99043	2.04167e-07	1.91566e-05	up	Pyruvate dehydrogenase E1 alpha subunit (EC 1.2.4.1).
Os06g0246500	8.43708	4.11271e-07	3.24311e-05	up	Pyruvate dehydrogenase E1 alpha subunit (EC 1.2.4.1).
Os06g0248500	2.94616	8.30053e-07	5.51949e-05	up	U box domain containing protein.
Os06g0250600	2.55086	6.34167e-06	0.000282737	up	Ankyrin domain containing protein.
Os06g0250600	2.42957	3.6737e-07	2.98177e-05	up	Ankyrin domain containing protein.
Os06g0254600	4.44468	8.75594e-09	1.55334e-06	up	Caleosin related family protein.
Os06g0258000	2.13403	2.7821e-06	0.000143128	up	Typical P-type R2R3 Myb protein (Fragment).
Os06g0270200	2.49708	5.02939e-09	9.61881e-07	up	Potassium transporter 24.
Os06g0274950	9.87931	2.81122e-08	4.08579e-06	up	Hypothetical gene.
Os06g0275700	2.97274	2.78522e-07	2.4175e-05	up	Beta-catenin repeat family protein.
Os06g0298200	3.82299	6.9679e-07	4.84532e-05	up	Oryza sativa (indica cultivar-group) Hd1.
Os06g0298400	2.95652	2.37621e-06	0.000126545	up	WW/Rsp5/WWP domain containing protein.
Os06g0300500	7.64198	6.57837e-09	1.20977e-06	up	Steroid nuclear receptor ligand-binding domain containing protein.
Os06g0307900	3.83032	2.17017e-06	0.000117601	up	Protein of unknown function DUF1618 domain containing protein.
Os06g0315000	3.92336	6.70262e-08	8.16423e-06	up	SAM dependent carboxyl methyltransferase domain containing protein.
Os06g0315000	6.06627	3.27713e-09	6.70313e-07	up	SAM dependent carboxyl methyltransferase domain containing protein.
Os06g0318566	2.75185	6.97695e-07	4.85002e-05	up	Hypothetical protein.
Os06g0318650	3.01737	1.73675e-06	9.80612e-05	up	Hypothetical protein.
Os06g0324400	13.55	1.1849e-07	1.2641e-05	up	Late embryogenesis abundant (LEA) group 1 family protein.
Os06g0341300	14.0739	2.42515e-07	2.17645e-05	up	Seed maturation protein domain containing protein.
Os06g0345200	2.02058	1.10543e-06	6.89534e-05	up	Nicotianamine aminotransferase.
Os06g0354700	3.12789	4.32333e-11	4.73539e-08	up	Hydrolase alpha/beta fold family protein.
Os06g0355300	6.11811	4.16968e-06	0.00019895	up	Auxin-responsive protein IAA22.
Os06g0356800	10.5181	9.90546e-06	0.000410662	up	Xylanase inhibitor protein I precursor.
Os06g0356800	4.41281	1.04366e-06	6.59317e-05	up	Xylanase inhibitor protein I precursor.
Os06g0473800	12.7956	2.08327e-08	3.18433e-06	up	Oleosin family protein.
Os06g0486900	5.35132	2.32907e-07	2.10903e-05	up	Formate dehydrogenase mitochondrial precursor (EC 1.2.1.2) (NAD- dependent formate dehydrogenase) (FDH).
Os06g0494100	2.00474	5.10793e-06	0.000236175	up	Serine/threonine protein kinase-related domain containing protein.
Os06g0498800	8.9475	3.29903e-07	2.74879e-05	up	MOTHER of FT and TF1 protein.
Os06g0498800	6.77385	1.12922e-06	7.01476e-05	up	MOTHER of FT and TF1 protein.
Os06g0501900	2.0047	8.64587e-07	5.70576e-05	up	Cytochrome P450 family protein.
Os06g0553001	4.09034	7.64487e-06	0.000330894	up	Conserved hypothetical protein.
Os06g0553100	4.78312	7.87536e-07	5.3011e-05	up	Heat stress transcription factor C-2b.
Os06g0559500	2.03753	2.66089e-07	2.34228e-05	up	Acid phosphatase (EC 3.1.3.2) 1 allozyme 1.
Os06g0563250	2.32161	1.36492e-06	8.1255e-05	up	Hypothetical gene.
Os06g0590500	3.01049	3.17462e-07	2.66945e-05	up	Syntaxin 121 (AtSYP121) (Syntaxin-related protein At-Syr1).
Os06g0592500	2.01621	1.30037e-07	1.35615e-05	up	Ethylene-responsive transcriptional coactivator.
Os06g0602800	2.16911	3.95881e-07	3.15325e-05	up	Acetylglucosaminyltransferase.
Os06g0608800	2.12602	6.93019e-07	4.82784e-05	up	Zinc finger RING/FYVE/PHD-type domain containing protein.
Os06g0625800	5.45554	8.31911e-08	9.72418e-06	up	Pentatricopeptide repeat domain containing protein.
Os06g0633375	2.39349	6.62042e-06	0.000292481	up	Hypothetical protein.
Os06g0650900	2.79903	4.45593e-06	0.000210706	up	Heat shock protein DnaJ family protein.
Os06g0651200	7.01104	2.04881e-06	0.000112263	up	Conserved hypothetical protein.
Os06g0651300	3.30693	7.75241e-09	1.39178e-06	up	Zinc finger U1-type domain containing protein.
Os06g0654000	2.51827	6.80771e-12	3.78715e-08	up	Peptidase C19 ubiquitin carboxyl-terminal hydrolase 2 family protein.
Os06g0661500	2.278	1.78698e-06	0.000100521	up	Conserved hypothetical protein.
Os06g0662550	5.46258	5.70455e-07	4.16982e-05	up	Conserved hypothetical protein.
Os06g0662550	5.04422	1.13477e-07	1.22484e-05	up	Conserved hypothetical protein.
Os06g0662550	6.67655	6.59497e-07	4.64637e-05	up	Conserved hypothetical protein.
Os06g0668200	3.52653	2.23377e-09	4.82326e-07	up	Phosphoglycerate kinase cytosolic (EC 2.7.2.3).
Os06g0674800	2.87822	1.4452e-06	8.49693e-05	up	Hypothetical conserved gene.
Os06g0676000	6.80392	1.6539e-06	9.44809e-05	up	Integral membrane protein Metal ion transport
Os06g0681200	6.06144	2.98157e-06	0.000151276	up	Cupredoxin domain containing protein.
Os06g0681200	5.73874	4.08364e-07	3.22533e-05	up	Cupredoxin domain containing protein.
Os06g0682900	2.46556	5.19538e-07	3.87846e-05	up	Heat stress associated protein Long-term acquired thermotolerance
Os06g0683100	5.0175	7.48264e-07	5.10173e-05	up	NAD(P)-binding domain containing protein.
Os06g0683100	6.17445	3.2228e-07	2.70083e-05	up	NAD(P)-binding domain containing protein.
Os06g0683950	4.44444	1.63895e-07	1.61938e-05	up	Armadillo-like helical domain containing protein.
Os06g0684000	2.03184	1.81551e-06	0.000101909	up	External rotenone-insensitive NADPH dehydrogenase.
Os06g0684900	2.9854	3.25911e-07	2.72424e-05	up	F-box domain Skp2-like domain containing protein.
Os06g0695600	2.51877	1.37495e-07	1.41542e-05	up	Zinc finger RING/FYVE/PHD-type domain containing protein.
Os06g0698300	6.27964	7.03997e-07	4.88179e-05	up	Protein phosphatase 2C family protein.
Os06g0698300	9.14567	3.22049e-08	4.55851e-06	up	Protein phosphatase 2C family protein.
Os06g0698300	3.45097	2.70102e-07	2.37119e-05	up	Protein phosphatase 2C family protein.
Os06g0698802	2.76956	6.56287e-07	4.62838e-05	up	Hypothetical conserved gene.
Os06g0702600	2.33565	4.05318e-08	5.47491e-06	up	Auxin response factor 19 Control of leaf angle
Os06g0704000	7.92019	1.35678e-07	1.40082e-05	up	Protein of unknown function DUF659 domain containing protein.
Os06g0710001	2.53698	1.27441e-06	7.71818e-05	up	Hypothetical conserved gene.
Os06g0711100	2.55845	5.97828e-12	3.46241e-08	up	Conserved hypothetical protein.
Os06g0712300	2.72705	4.3771e-07	3.39684e-05	up	Hypothetical conserved gene.
Os06g0712300	2.30396	2.62261e-06	0.000136587	up	Hypothetical conserved gene.
Os06g0716200	9.4186	6.10826e-08	7.59116e-06	up	Thaumatin pathogenesis-related family protein.
Os06g0726200	3.14168	2.24668e-06	0.000120788	up	Chitinase 1.
Os06g0731000	8.72847	7.93997e-08	9.37169e-06	up	Conserved hypothetical protein.
Os07g0103500	5.30575	2.60735e-07	2.3071e-05	up	2OG-Fe(II) oxygenase domain containing protein.
Os07g0103500	7.4396	3.30377e-08	4.65043e-06	up	2OG-Fe(II) oxygenase domain containing protein.
Os07g0108800	3.3471	2.34254e-06	0.000125082	up	Two-pore K+ channel family protein K+ homeostasis Osmotic and drought tolerance
Os07g0118300	2.71148	8.80348e-08	1.01334e-05	up	predicted protein.
Os07g0119800	5.81746	7.08613e-08	8.55007e-06	up	Protein of unknown function DUF538 domain containing protein.
Os07g0122200	9.03046	6.30296e-08	7.76918e-06	up	Protein of unknown function DUF1719 Oryza sativa family protein.
Os07g0122200	3.11077	1.77904e-06	0.000100155	up	Protein of unknown function DUF1719 Oryza sativa family protein.
Os07g0124300	2.66596	1.93571e-08	3.0033e-06	up	bZIP transcription factor family protein.
Os07g0124900	2.83868	9.10575e-06	0.000383334	up	Allergen V5/Tpx-1 related family protein.
Os07g0125500	4.11078	3.54988e-07	2.90638e-05	up	Allergen V5/Tpx-1 related family protein.
Os07g0126301	3.92723	2.91673e-07	2.50439e-05	up	Allergen V5/Tpx-1 related family protein.
Os07g0129200	2.22563	1.01751e-06	6.45941e-05	up	Pathogenesis-related 1a protein Regulation of abiotic stress responses
Os07g0154100	16.0414	3.62826e-06	0.000177504	up	Viviparous-14.
Os07g0154100	11.4107	1.42087e-06	8.39122e-05	up	Viviparous-14.
Os07g0154400	21.0851	5.2805e-07	3.92638e-05	up	Armadillo-type fold domain containing protein.
Os07g0159700	4.66744	2.50252e-06	0.000131706	up	Protein kinase catalytic domain domain containing protein.
Os07g0164800	2.0422	9.08661e-06	0.000382718	up	Conserved hypothetical protein.
Os07g0169600	2.46366	2.25052e-06	0.000120937	up	2OG-Fe(II) oxygenase domain containing protein.
Os07g0178800	2.12541	5.0078e-07	3.766e-05	up	Low molecular mass early light-inducible protein HV90 chloroplast precursor (ELIP).
Os07g0179300	2.73599	2.88126e-08	4.16467e-06	up	Methyltransferase type 11 domain containing protein.
Os07g0180800	3.15131	2.79096e-06	0.000143416	up	RNA recognition motif domain domain containing protein.
Os07g0180800	2.17778	9.71965e-07	6.24777e-05	up	RNA recognition motif domain domain containing protein.
Os07g0182100	3.38603	2.27226e-06	0.000121884	up	Tryptophan synthase alpha chain.
Os07g0182100	2.36263	1.5749e-06	9.07621e-05	up	Tryptophan synthase alpha chain.
Os07g0187400	2.18155	5.58346e-07	4.09447e-05	up	ATPase AAA-type core domain containing protein.
Os07g0188700	7.86387	9.30782e-08	1.05736e-05	up	Hypothetical conserved gene.
Os07g0192000	3.13431	6.83274e-06	0.000300668	up	ATPase AAA-type core domain containing protein.
Os07g0195100	2.36635	1.03384e-06	6.54643e-05	up	Ras-related protein ARA-3.
Os07g0195300	2.1568	1.27324e-07	1.33444e-05	up	Hypothetical conserved gene.
Os07g0209100	2.29332	1.59899e-06	9.19029e-05	up	Seed imbibition protein (Fragment).
Os07g0242000	7.68421	6.69373e-06	0.00029535	up	Cyclin-like F-box domain containing protein.
Os07g0267200	3.92325	5.43052e-07	4.01043e-05	up	Conserved hypothetical protein.
Os07g0267200	3.47867	4.43627e-07	3.43123e-05	up	Conserved hypothetical protein.
Os07g0296000	2.22809	5.36046e-07	3.97048e-05	up	Conserved hypothetical protein.
Os07g0418600	2.65946	2.2132e-06	0.00011931	up	Proline-rich glycoprotein ABA-dependent inhibition of root growth
Os07g0418700	2.69059	4.92496e-08	6.42266e-06	up	Proline-rich glycoprotein ABA-dependent inhibition of root growth
Os07g0438700	3.29514	4.64415e-06	0.000218361	up	Hypothetical conserved gene.
Os07g0458800	2.40704	7.89587e-06	0.000340122	up	Serine/threonine-protein kinase 19.
Os07g0459500	5.73571	3.67082e-06	0.000179193	up	F-box domain Skp2-like domain containing protein.
Os07g0463400	2.08236	5.18835e-09	9.87159e-07	up	RES protein.
Os07g0481000	4.04017	9.4341e-06	0.000394798	up	Hypothetical gene.
Os07g0485100	2.41739	1.98864e-07	1.87925e-05	up	Beta-ureidopropionase (EC 3.5.1.6) (Beta-alanine synthase) (N- carbamoyl-beta-alanine amidohydrolase).
Os07g0485100	2.06187	6.22559e-07	4.45216e-05	up	Beta-ureidopropionase (EC 3.5.1.6) (Beta-alanine synthase) (N- carbamoyl-beta-alanine amidohydrolase).
Os07g0499800	2.36223	6.52528e-07	4.6111e-05	up	Ubiquitin-protein ligase E3 MDM2 domain containing protein.
Os07g0514400	5.38028	7.40896e-06	0.00032187	up	Domain of unknown function DUF629 domain containing protein.
Os07g0516400	3.80739	5.14402e-07	3.84882e-05	up	Hypothetical conserved gene.
Os07g0529000	3.56533	8.92747e-07	5.84461e-05	up	Isocitrate lyase (Fragment).
Os07g0529000	3.01113	6.27454e-06	0.000280246	up	Isocitrate lyase (Fragment).
Os07g0529000	3.91576	6.58474e-06	0.000291283	up	Isocitrate lyase (Fragment).
Os07g0534100	25.0146	2.20818e-08	3.35585e-06	up	Protein kinase catalytic domain domain containing protein.
Os07g0534100	3.18982	5.51222e-07	4.05306e-05	up	Protein kinase catalytic domain domain containing protein.
Os07g0534200	2.7239	4.01974e-07	3.18857e-05	up	Hypothetical protein.
Os07g0537600	2.4634	1.21484e-06	7.43196e-05	up	Hypothetical conserved gene.
Os07g0539100	9.50806	4.43526e-06	0.0002098	up	Glycoside hydrolase family 17 protein.
Os07g0539700	2.34301	4.71219e-07	3.5968e-05	up	Hypothetical conserved gene.
Os07g0545001	7.5	5.3671e-06	0.000246219	up	Hypothetical gene.
Os07g0554100	10.9375	8.77195e-06	0.000371291	up	Conserved hypothetical protein.
Os07g0555200	2.22323	7.23587e-09	1.31411e-06	up	predicted protein.
Os07g0559550	4.81228	7.91001e-07	5.31681e-05	up	Hypothetical gene.
Os07g0559700	2.17986	7.62525e-07	5.17809e-05	up	Monosaccharide transporter 3.
Os07g0564500	8.85957	2.76445e-08	4.03445e-06	up	Pyridine nucleotide-disulphide oxidoreductase NAD-binding region domain containing protein.
Os07g0565000	6.25852	5.35872e-08	6.85511e-06	up	40S ribosomal protein S11.
Os07g0566500	4.90957	1.22446e-07	1.29681e-05	up	NAC domain protein.
Os07g0578050	3.33135	3.43573e-06	0.000170033	up	Hypothetical gene.
Os07g0578600	2.89691	2.74949e-06	0.00014178	up	5-formyltetrahydrofolate cyclo-ligase.
Os07g0593400	2.03859	5.36258e-08	6.8559e-06	up	golgi transport 1 protein B.
Os07g0603600	2.28677	4.4659e-08	5.91893e-06	up	esterase PIR7B.
Os07g0604400	2.0369	3.82747e-07	3.07646e-05	up	COBRA-like protein 6.
Os07g0607300	2.23241	2.49232e-09	5.26601e-07	up	Bromo adjacent region domain containing protein.
Os07g0613600	2.99428	2.13359e-07	1.97662e-05	up	Hypothetical conserved gene.
Os07g0618400	2.263	1.11121e-06	6.92522e-05	up	Leucine-rich repeat transmembrane protein kinase 1 (Fragment).
Os07g0620700	5.52482	1.30104e-06	7.83903e-05	up	Conserved hypothetical protein.
Os07g0621100	2.09909	1.37722e-08	2.26127e-06	up	Pentatricopeptide repeat domain containing protein.
Os07g0622400	3.46938	6.99393e-07	4.85783e-05	up	Hypothetical protein.
Os07g0633200	3.62642	2.57783e-06	0.000134637	up	SC35-like splicing factor SCL30a 30a kD.
Os07g0633200	4.09667	1.52605e-08	2.46729e-06	up	SC35-like splicing factor SCL30a 30a kD.
Os07g0633200	4.03837	3.79178e-07	3.05416e-05	up	SC35-like splicing factor SCL30a 30a kD.
Os07g0633200	4.96513	2.84296e-07	2.45451e-05	up	SC35-like splicing factor SCL30a 30a kD.
Os07g0633300	4.0822	9.01982e-13	1.6732e-08	up	Hypothetical conserved gene.
Os07g0638100	2.98632	3.35716e-06	0.000166687	up	Six-bladed beta-propeller TolB-like domain containing protein.
Os07g0643000	3.83555	8.67979e-07	5.71741e-05	up	Alpha/beta hydrolase fold-3 domain containing protein.
Os07g0656500	2.11559	1.04951e-06	6.61978e-05	up	Magnesium-chelatase subunit H family protein expressed.
Os07g0656500	2.10838	4.03842e-06	0.000193671	up	Magnesium-chelatase subunit H family protein expressed.
Os07g0663500	16.1875	4.74166e-08	6.22044e-06	up	Short-chain dehydrogenase/reductase (Fragment).
Os07g0668900	3.13923	1.65399e-07	1.63043e-05	up	Serine/threonine-protein kinase PBS1 (EC 2.7.1.37) (AvrPphB susceptible protein 1).
Os07g0668900	2.45004	1.77713e-07	1.72408e-05	up	Serine/threonine-protein kinase PBS1 (EC 2.7.1.37) (AvrPphB susceptible protein 1).
Os07g0672175	2.06132	2.94934e-06	0.000150015	up	armadillo/beta-catenin repeat family protein / BTB/POZ domain-containing protein.
Os07g0673200	2.67469	3.51318e-06	0.000172995	up	RING-type E3 ubiquitin-ligase Maintenance of phosphate homeostasis via degradation of phosphate transporters
Os07g0673200	2.71482	9.91797e-07	6.34375e-05	up	RING-type E3 ubiquitin-ligase Maintenance of phosphate homeostasis via degradation of phosphate transporters
Os07g0673900	5.82703	5.07228e-07	3.80705e-05	up	Hypoxia induced protein Early stage of hypoxia signalling
Os07g0677900	24.2632	1.49177e-06	8.69759e-05	up	Protein of unknown function DUF827 plant family protein.
Os07g0679300	2.49437	1.78113e-07	1.72637e-05	up	Alpha-galactosidase precursor (EC 3.2.1.22) (Melibiase) (Alpha-D- galactoside galactohydrolase).
Os07g0679300	2.09992	1.87532e-07	1.79652e-05	up	Alpha-galactosidase precursor (EC 3.2.1.22) (Melibiase) (Alpha-D- galactoside galactohydrolase).
Os07g0679400	9.72143	4.15334e-07	3.26575e-05	up	Conserved hypothetical protein.
Os07g0679400	9.12921	2.90811e-08	4.19775e-06	up	Conserved hypothetical protein.
Os07g0679400	2.67336	3.88648e-07	3.11029e-05	up	Conserved hypothetical protein.
Os07g0684900	4.64337	3.09278e-06	0.000155703	up	WUSCHEL-related homeobox protein Transcription factor Crown root development
Os07g0686500	5.02229	3.87074e-07	3.10121e-05	up	Protein of unknown function DUF632 domain containing protein.
Os07g0687900	5.48977	5.67927e-07	4.15782e-05	up	WSI76 protein induced by water stress.
Os07g0687900	4.58187	3.52842e-06	0.000173645	up	WSI76 protein induced by water stress.
Os07g0689300	2.8227	5.6981e-07	4.16632e-05	up	Lon protease homolog mitochondrial.
Os07g0693500	3.14901	3.2928e-07	2.74534e-05	up	Hypothetical gene.
Os07g0693500	3.04048	9.55391e-08	1.07715e-05	up	Hypothetical gene.
Os07g0693500	2.6175	6.41412e-06	0.000285365	up	Hypothetical gene.
Os07g0694600	2.30723	4.07344e-06	0.000194886	up	Prephenate dehydratase domain containing protein.
Os08g0100700	2.00973	6.02884e-07	4.34679e-05	up	Hypothetical conserved gene.
Os08g0104400	8.05529	7.70835e-07	5.22057e-05	up	Conserved hypothetical protein.
Os08g0104700	2.27878	2.43307e-07	2.18218e-05	up	Hypothetical conserved gene.
Os08g0109400	2.22548	9.27338e-06	0.000389344	up	AUX/IAA protein family protein.
Os08g0110600	5.39924	8.57545e-07	5.66679e-05	up	Protein of unknown function DUF1442 domain containing protein.
Os08g0110700	2.15206	3.22661e-07	2.70295e-05	up	DDHD domain containing protein.
Os08g0110700	2.21545	1.06974e-06	6.7143e-05	up	DDHD domain containing protein.
Os08g0112300	3.78432	2.75393e-07	2.4041e-05	up	Transferase domain containing protein.
Os08g0112300	5.90653	2.23168e-07	2.04494e-05	up	Transferase domain containing protein.
Os08g0112700	2.23149	7.70496e-09	1.38562e-06	up	MADS-box transcription factor Regulator of both biotic and abiotic stress responses
Os08g0117900	2.49068	4.58975e-06	0.000216067	up	Myeloid leukemia factor domain containing protein.
Os08g0117900	2.13319	1.0637e-11	4.17983e-08	up	Myeloid leukemia factor domain containing protein.
Os08g0118000	5.05703	1.09519e-07	1.19308e-05	up	Protein of unknown function DUF296 domain containing protein.
Os08g0120600	3.63861	3.78112e-07	3.04814e-05	up	Fructose-bisphosphate aldolase cytoplasmic isozyme (EC 4.1.2.13).
Os08g0120600	3.96127	1.60009e-06	9.19535e-05	up	Fructose-bisphosphate aldolase cytoplasmic isozyme (EC 4.1.2.13).
Os08g0137300	2.25772	6.46059e-07	4.57763e-05	up	Protein of unknown function DUF604 family protein.
Os08g0140300	5.52284	5.60319e-08	7.0779e-06	up	Aromatic L-amino acid decarboxylase (AADC) Senescence-induced serotonin biosynthesis
Os08g0141400	2.67034	1.60924e-07	1.59936e-05	up	mRNA clone: RTFL01-03-I20.
Os08g0152600	2.53152	1.98061e-08	3.05949e-06	up	Protein of unknown function DUF1336 domain containing protein.
Os08g0152600	2.27428	7.31745e-09	1.32749e-06	up	Protein of unknown function DUF1336 domain containing protein.
Os08g0153900	5.40549	8.09465e-08	9.51971e-06	up	Protein of unknown function DUF599 family protein.
Os08g0154900	18.4	7.24904e-06	0.000316385	up	Pleckstrin homology-type domain containing protein.
Os08g0169100	8.78194	7.19002e-08	8.65567e-06	up	Hypothetical gene.
Os08g0169100	16.6601	3.77475e-08	5.16314e-06	up	Hypothetical gene.
Os08g0169100	11.1108	3.38537e-08	4.73313e-06	up	Hypothetical gene.
Os08g0169100	5.7914	7.64115e-07	5.18352e-05	up	Hypothetical gene.
Os08g0170800	2.47494	1.57057e-08	2.53057e-06	up	Conserved hypothetical protein.
Os08g0174100	2.5266	2.59048e-06	0.00013518	up	transferase family protein.
Os08g0183900	2.06229	5.09042e-06	0.00023552	up	dihydroflavonol-4-reductase.
Os08g0189200	2.34549	2.25377e-07	2.05856e-05	up	Germin-like protein 8-3 Disease resistance
Os08g0205125	2.17857	1.50526e-06	8.75031e-05	up	Hypothetical protein.
Os08g0205800	3.02454	9.49833e-06	0.000396936	up	Hypothetical conserved gene.
Os08g0240500	8.53462	6.57235e-08	8.03146e-06	up	Glycoside hydrolase family 16 domain containing protein.
Os08g0243866	8.18265	1.04169e-09	2.55314e-07	up	chromatin remodeling complex subunit.
Os08g0250300	8.39061	1.27726e-07	1.33699e-05	up	predicted protein.
Os08g0301500	2.02047	4.22159e-07	3.30222e-05	up	Sucrose-phosphate synthase 2 (EC 2.4.1.14) (Fragment).
Os08g0327700	8.77499	3.17344e-07	2.66899e-05	up	Late embryogenesis abundant (LEA) group 1 family protein.
Os08g0331800	4.83491	6.21049e-09	1.14996e-06	up	Conserved hypothetical protein.
Os08g0335200	3.32714	1.45007e-06	8.51731e-05	up	Hypothetical protein.
Os08g0335200	3.51461	1.56616e-06	9.03969e-05	up	Hypothetical protein.
Os08g0335500	3.69951	1.21249e-06	7.42081e-05	up	Hypothetical conserved gene.
Os08g0374000	11.6765	1.05329e-06	6.63867e-05	up	Bet v I allergen family protein.
Os08g0374600	6.83204	3.1884e-07	2.67943e-05	up	Receptor kinase-like protein.
Os08g0384500	2.25596	2.24221e-11	4.27861e-08	up	ABC transporter-like domain containing protein.
Os08g0384900	2.04421	5.63696e-06	0.000256733	up	Zinc finger RING/FYVE/PHD-type domain containing protein.
Os08g0387050	3.35462	4.77213e-06	0.00022347	up	Conserved hypothetical protein.
Os08g0398500	9.74883	4.96146e-08	6.46029e-06	up	KED-like protein.
Os08g0402500	3.13791	3.11035e-07	2.63005e-05	up	Protein of unknown function DUF76C plant domain containing protein.
Os08g0412700	2.78511	2.39149e-06	0.000127164	up	Protein of unknown function DUF1262 family protein.
Os08g0412800	6.01719	3.11978e-07	2.63433e-05	up	Protein of unknown function DUF1262 family protein.
Os08g0414500	3.9298	1.08927e-07	1.18816e-05	up	Hypothetical conserved gene.
Os08g0415600	4.74935	1.50717e-07	1.5208e-05	up	ubiquitin-protein ligase.
Os08g0416900	2.48285	6.9338e-06	0.000304512	up	Chaperone-like protein of protochlorophyllide oxidoreductase (POR) J-like protein Regulation of chlorophyll biosynthesis
Os08g0425800	2.43674	3.43798e-06	0.000170116	up	Hypothetical conserved gene.
Os08g0425800	3.28095	3.78743e-07	3.05181e-05	up	Hypothetical conserved gene.
Os08g0428100	2.57111	1.13784e-06	7.05689e-05	up	Hypothetical conserved gene.
Os08g0433200	2.0543	1.10228e-06	6.88179e-05	up	Conserved hypothetical protein.
Os08g0434100	2.1242	9.42851e-06	0.000394642	up	S-like ribonuclease (RNase PD2) (Fragment).
Os08g0442900	18.3637	1.3996e-07	1.43696e-05	up	Hypothetical protein.
Os08g0444440	2.62675	5.92112e-06	0.00026706	up	Hypothetical conserved gene.
Os08g0444440	2.79659	2.34254e-07	2.11715e-05	up	Hypothetical conserved gene.
Os08g0444440	2.8913	5.54497e-07	4.0736e-05	up	Hypothetical conserved gene.
Os08g0448050	2.65585	8.85529e-08	1.0171e-05	up	Hypothetical protein.
Os08g0458200	2.32752	2.75899e-07	2.40708e-05	up	MTD1.
Os08g0467500	4.52632	2.23435e-08	3.38588e-06	up	Abscisic acid and stress inducible (A22) gene.
Os08g0474000	18.3	2.61888e-08	3.85126e-06	up	AP2 domain containing protein RAP2.6 (Fragment).
Os08g0474000	9.66667	2.53735e-07	2.25561e-05	up	AP2 domain containing protein RAP2.6 (Fragment).
Os08g0478466	5.61929	8.63093e-06	0.000366396	up	Protein of unknown function DUF296 domain containing protein.
Os08g0478500	2.1928	1.68583e-06	9.5903e-05	up	Peptidase C19 ubiquitin carboxyl-terminal hydrolase 2 family protein.
Os08g0485400	2.72081	3.91867e-07	3.12835e-05	up	2-nitropropane dioxygenase-like protein.
Os08g0485400	2.78947	3.82407e-11	4.51299e-08	up	2-nitropropane dioxygenase-like protein.
Os08g0497600	2.0864	2.02177e-06	0.000111127	up	WD40 subfamily protein Salt stress
Os08g0497900	2.05631	9.11514e-08	1.04128e-05	up	Conserved hypothetical protein.
Os08g0506000	2.31494	2.2906e-08	3.44886e-06	up	Ovarian tumour otubain domain containing protein.
Os08g0508000	7.07692	8.97565e-06	0.000378611	up	Cytochrome P450 family protein.
Os08g0508000	3.29748	3.84528e-07	3.08697e-05	up	Cytochrome P450 family protein.
Os08g0508000	2.23928	1.13749e-06	7.05574e-05	up	Cytochrome P450 family protein.
Os08g0508800	5.31741	9.75055e-07	6.2632e-05	up	Lipoxygenase chloroplast precursor (EC 1.13.11.12).
Os08g0508800	5.88636	1.50059e-07	1.51597e-05	up	Lipoxygenase chloroplast precursor (EC 1.13.11.12).
Os08g0508800	3.91167	3.67574e-08	5.05141e-06	up	Lipoxygenase chloroplast precursor (EC 1.13.11.12).
Os08g0509100	4.25	5.47883e-06	0.000250665	up	Lipoxygenase.
Os08g0509100	2.61989	2.32117e-06	0.000124082	up	Lipoxygenase.
Os08g0513051	2.00301	4.01996e-06	0.000192939	up	Hypothetical protein.
Os08g0516000	2.5602	2.41827e-08	3.61279e-06	up	Conserved hypothetical protein.
Os08g0519400	2.14449	9.26673e-09	1.62838e-06	up	Apolipoprotein/apolipophorin domain containing protein.
Os08g0529300	8.90926	5.18023e-08	6.67322e-06	up	Hypothetical conserved gene.
Os08g0531100	2.12618	1.47986e-06	8.64646e-05	up	MAP65/ASE1 family protein.
Os08g0536200	10.0065	6.14693e-08	7.62353e-06	up	Uncharacterised protein family UPF0497 trans-membrane plant subgroup domain containing protein.
Os08g0542700	2.07292	6.4051e-07	4.54593e-05	up	Ankyrin repeat containing protein.
Os08g0542700	8.96429	1.31902e-06	7.92595e-05	up	Ankyrin repeat containing protein.
Os08g0544400	2.83171	9.19666e-06	0.000386545	up	ABC-2 type transporter domain containing protein.
Os08g0546800	2.28668	8.20464e-06	0.000351382	up	Heat stress transcription factor B-2b.
Os08g0549900	2.47139	1.42902e-06	8.42646e-05	up	Conserved hypothetical protein.
Os08g0555800	5.92351	6.18262e-08	7.65656e-06	up	Conserved hypothetical protein.
Os08g0557600	2.12393	4.64856e-08	6.11692e-06	up	Cytosolic monodehydroascorbate reductase.
Os08g0558100	2.21948	3.39367e-06	0.000168129	up	EF hand domain containing protein.
Os08g0558100	3.20992	1.98758e-07	1.87867e-05	up	EF hand domain containing protein.
Os08g0558200	2.4013	1.41191e-06	8.34999e-05	up	Thioredoxin fold domain containing protein.
Os08g0559400	2.2458	1.1759e-06	7.24406e-05	up	Cyclophilin-like protein.
Os08g0559501	3.5982	2.87323e-06	0.000146853	up	Conserved hypothetical protein.
Os08g0564800	2.70741	5.50399e-08	6.98598e-06	up	Coactivator CBP KIX domain containing protein.
Os08g0565200	7.14679	4.5759e-08	6.03444e-06	up	Pathogenesis-related transcriptional factor and ERF domain containing protein.
Os08g0566700	3.78023	5.24144e-07	3.90352e-05	up	Cullin repeat-like-containing domain domain containing protein.
Os09g0109600	14.2253	7.41723e-07	5.06694e-05	up	Conserved hypothetical protein.
Os09g0109600	16.6694	2.48933e-08	3.69935e-06	up	Conserved hypothetical protein.
Os09g0120033	5.39984	1.19245e-11	4.17983e-08	up	Conserved hypothetical protein.
Os09g0120033	4.08921	2.75065e-08	4.01708e-06	up	Conserved hypothetical protein.
Os09g0127700	20.2092	1.84227e-08	2.88159e-06	up	Conserved hypothetical protein.
Os09g0134500	2.66275	5.71948e-10	1.6046e-07	up	Trithorax group protein Regulation of flowering time
Os09g0250700	2.53846	6.50207e-08	7.97046e-06	up	ABC-1 domain containing protein.
Os09g0272000	2.82163	6.8292e-09	1.25046e-06	up	Heavy metal transport/detoxification protein domain containing protein.
Os09g0272500	2.56504	7.74254e-06	0.000334437	up	cation cation antiporter.
Os09g0278000	7.27788	1.2105e-07	1.28557e-05	up	Hypothetical conserved gene.
Os09g0295200	22.6933	1.72831e-08	2.73061e-06	up	Conserved hypothetical protein.
Os09g0323150	2.04893	1.16816e-07	1.25161e-05	up	Hypothetical protein.
Os09g0325700	4.429	4.1608e-08	5.58636e-06	up	Protein phosphatase 2C Abiotic stress response Early panicle development
Os09g0325800	3.51537	6.934e-07	4.8289e-05	up	Conserved hypothetical protein.
Os09g0332600	2.4302	2.62244e-06	0.000136587	up	Hypothetical protein.
Os09g0332700	2.10588	3.05049e-07	2.58979e-05	up	Hypothetical conserved gene.
Os09g0358500	123.4	6.0666e-09	1.12743e-06	up	Hypothetical conserved gene.
Os09g0363500	2.17528	1.0777e-06	6.75325e-05	up	Conserved hypothetical protein.
Os09g0364400	2.66785	6.01343e-07	4.34008e-05	up	Conserved hypothetical protein.
Os09g0376800	2.00571	2.8791e-06	0.000147118	up	Trehalose-6-phosphate synthase (Fragment).
Os09g0378700	7.69129	2.57325e-06	0.000134464	up	ubiquitin-protein ligase.
Os09g0378700	10.4198	4.99168e-07	3.75589e-05	up	ubiquitin-protein ligase.
Os09g0379500	3.53449	3.83314e-06	0.00018568	up	Hypothetical protein.
Os09g0379600	3.43737	6.92475e-06	0.000304241	up	Homeobox-leucine zipper protein HOX25.
Os09g0393200	2.73109	2.3067e-07	2.09596e-05	up	transcription factor jumonji (jmjC) domain-containing protein.
Os09g0400600	3.06464	2.35411e-06	0.000125542	up	Hypothetical protein.
Os09g0415050	2.89701	2.81587e-07	2.4361e-05	up	Hypothetical gene.
Os09g0415050	2.85274	4.06835e-07	3.21626e-05	up	Hypothetical gene.
Os09g0415050	6.83529	4.509e-08	5.96297e-06	up	Hypothetical gene.
Os09g0417500	3.83414	1.74465e-06	9.84281e-05	up	Pentatricopeptide repeat domain containing protein.
Os09g0425200	3.74749	1.78099e-06	0.000100251	up	Conserved hypothetical protein.
Os09g0440300	2.78184	3.77209e-07	3.04351e-05	up	Aldehyde dehydrogenase.
Os09g0440300	2.24142	1.17773e-06	7.25424e-05	up	Aldehyde dehydrogenase.
Os09g0440300	2.77113	4.91401e-07	3.71196e-05	up	Aldehyde dehydrogenase.
Os09g0441000	2.00234	5.66905e-06	0.000257861	up	Peptidase S8 subtilisin-related domain containing protein.
Os09g0442100	2.24179	6.12708e-07	4.39808e-05	up	Protein kinase core domain containing protein.
Os09g0442100	4.36702	4.23582e-08	5.67087e-06	up	Protein kinase core domain containing protein.
Os09g0442600	3.50351	5.62629e-06	0.000256357	up	Plastid (P)ppGpp synthase.
Os09g0446200	3.38646	3.28868e-07	2.74353e-05	up	Gamma tubulin complex protein 3 domain containing protein.
Os09g0449800	2.44453	5.63175e-09	1.05947e-06	up	Conserved hypothetical protein.
Os09g0452900	9.73988	7.06735e-08	8.53228e-06	up	Glycosyl transferase family 31 protein.
Os09g0452900	3.67651	3.77954e-07	3.04784e-05	up	Glycosyl transferase family 31 protein.
Os09g0452900	5.50653	5.86385e-08	7.35879e-06	up	Glycosyl transferase family 31 protein.
Os09g0452900	2.95432	4.41241e-07	3.41733e-05	up	Glycosyl transferase family 31 protein.
Os09g0454900	2.39735	8.55214e-06	0.000363759	up	Serine/threonine protein kinase-related domain containing protein.
Os09g0455300	2.43874	1.00539e-06	6.40936e-05	up	INDEHISCENT protein.
Os09g0457900	14.9597	1.55556e-08	2.50925e-06	up	AP2/ERF transcription factor Regulation of the internode elongation
Os09g0463900	193.2	3.65424e-09	7.35002e-07	up	DNA binding protein.
Os09g0464033	3.29248	2.92559e-06	0.00014907	up	Hypothetical gene.
Os09g0468300	2.99915	1.39218e-06	8.25755e-05	up	Hypothetical conserved gene.
Os09g0472100	2.17122	4.83159e-07	3.67137e-05	up	ABC transporter.
Os09g0475500	3.56708	5.08451e-07	3.81284e-05	up	Protein of unknown function DUF246 plant family protein.
Os09g0477900	8.54745	5.33218e-06	0.00024483	up	NusB/RsmB/TIM44 domain containing protein.
Os09g0478300	2.60362	4.70038e-08	6.17379e-06	up	Cellulose synthase-like protein E6.
Os09g0482200	2.575	1.46469e-06	8.58647e-05	up	Peptidase A1 domain containing protein.
Os09g0482500	2.94444	1.09658e-06	6.84921e-05	up	Peptidase A1 domain containing protein.
Os09g0483700	4.80793	2.71465e-07	2.3792e-05	up	Hypothetical protein.
Os09g0487600	2.47359	9.93914e-07	6.35272e-05	up	polygalacturonase.
Os09g0487600	2.29629	5.04858e-07	3.79119e-05	up	polygalacturonase.
Os09g0487600	5.22811	1.50842e-07	1.52153e-05	up	polygalacturonase.
Os09g0487600	3.09545	5.40895e-07	3.99869e-05	up	polygalacturonase.
Os09g0491740	2.21907	8.60381e-07	5.68143e-05	up	Auxin efflux carrier domain containing protein.
Os09g0491740	2.61494	4.89588e-07	3.70292e-05	up	Auxin efflux carrier domain containing protein.
Os09g0504800	2.59069	6.72876e-08	8.18662e-06	up	tRNA-splicing endonuclease subunit Sen54 N-terminal domain containing protein.
Os09g0510200	3.36997	3.35064e-08	4.69857e-06	up	Protein of unknown function DUF667 family protein.
Os09g0511700	2.16279	1.8319e-06	0.000102706	up	Prunasin hydrolase isoform PH C precursor (EC 3.2.1.118).
Os09g0511700	2.20765	1.04523e-07	1.15082e-05	up	Prunasin hydrolase isoform PH C precursor (EC 3.2.1.118).
Os09g0513100	4.47038	1.86274e-06	0.000104187	up	phospholipase A1.
Os09g0513500	3.0552	1.36e-07	1.40379e-05	up	ZCN24.
Os09g0517200	96.1	5.04755e-08	6.54339e-06	up	Hypothetical conserved gene.
Os09g0530750	2.54417	1.16207e-06	7.17974e-05	up	Hypothetical protein.
Os09g0532000	2.19473	3.04753e-06	0.000153883	up	Senescence-inducible chloroplast protein Activation of the chlorophll-degrading pathway during leaf senescence
Os09g0532000	3.11052	6.37404e-06	0.000283881	up	Senescence-inducible chloroplast protein Activation of the chlorophll-degrading pathway during leaf senescence
Os09g0532900	6.95226	8.58367e-10	2.19016e-07	up	Myb transcription factor domain containing protein.
Os09g0539200	4.3465	4.50637e-07	3.47546e-05	up	Relative to SR12 protein (Fragment).
Os09g0544000	18.7258	9.61643e-09	1.67659e-06	up	Transferase family protein.
Os09g0552600	3.21493	4.48948e-09	8.73899e-07	up	RmlC-like jelly roll fold domain containing protein.
Os09g0554200	5.37778	5.4028e-08	6.8865e-06	up	Zinc finger RING/FYVE/PHD-type domain containing protein.
Os09g0555500	2.54683	9.29954e-06	0.00039021	up	Chloroplast phytoene synthase 3.
Os09g0560700	3.74219	1.83688e-07	1.76668e-05	up	Molybdenum cofactor sulfurase C-terminal domain containing protein.
Os09g0566100	3.15446	3.13091e-10	1.10462e-07	up	Hypothetical conserved gene.
Os09g0572400	3.63012	7.99849e-07	5.3652e-05	up	Abcf2-prov protein.
Os09g0572400	3.21833	5.49945e-06	0.000251418	up	Abcf2-prov protein.
Os09g0572450	3.2741	3.12708e-06	0.000157205	up	Hypothetical protein.
Os10g0101100	2.09741	1.00494e-10	6.05242e-08	up	Peptidase S10 serine carboxypeptidase family protein.
Os10g0135600	3.68495	2.25704e-07	2.06058e-05	up	Alpha/beta hydrolase family protein.
Os10g0159033	19.2895	4.28539e-06	0.000203598	up	Conserved hypothetical protein.
Os10g0162400	2.41528	7.30594e-06	0.000318343	up	Protein of unknown function DUF869 plant family protein.
Os10g0177200	6.85686	5.96875e-08	7.46164e-06	up	EF-HAND 2 domain containing protein.
Os10g0177200	2.57358	6.65566e-07	4.68444e-05	up	EF-HAND 2 domain containing protein.
Os10g0177200	2.13699	4.74409e-07	3.61593e-05	up	EF-HAND 2 domain containing protein.
Os10g0329400	2.42787	9.85565e-08	1.10235e-05	up	Conserved hypothetical protein.
Os10g0329400	5.53968	1.62843e-08	2.60691e-06	up	Conserved hypothetical protein.
Os10g0329400	4.71642	1.00831e-06	6.41862e-05	up	Conserved hypothetical protein.
Os10g0340301	13.2941	9.15432e-08	1.04435e-05	up	Conserved hypothetical protein.
Os10g0340301	4.37778	1.42119e-08	2.32264e-06	up	Conserved hypothetical protein.
Os10g0340301	6.35881	1.61966e-07	1.60557e-05	up	Conserved hypothetical protein.
Os10g0340301	3.69448	3.99182e-07	3.17237e-05	up	Conserved hypothetical protein.
Os10g0345100	2.22566	9.34162e-07	6.05851e-05	up	Multi antimicrobial extrusion protein MatE family protein.
Os10g0345100	3.05824	3.33272e-07	2.76826e-05	up	Multi antimicrobial extrusion protein MatE family protein.
Os10g0360100	2.45441	3.33203e-06	0.000165774	up	Conserved hypothetical protein.
Os10g0363100	2.38123	1.92418e-09	4.26822e-07	up	glycosyltransferase family GT8.
Os10g0364900	3.48503	8.36563e-07	5.55244e-05	up	Conserved hypothetical protein.
Os10g0369900	2.28446	3.19949e-10	1.11653e-07	up	Myo-inositol-1-phosphate synthase.
Os10g0376900	74.9	3.59127e-07	2.93458e-05	up	Helix-loop-helix DNA-binding domain containing protein.
Os10g0378450	9.85645	9.54468e-08	1.07647e-05	up	AT hook-containing MAR binding 1-like protein.
Os10g0379100	5.96201	9.39662e-08	1.06456e-05	up	Transferase family protein.
Os10g0382300	2.23919	7.42048e-07	5.06753e-05	up	Signal peptide containing large protein with proline stretches.
Os10g0389000	2.2643	1.29162e-06	7.7912e-05	up	Centrin.
Os10g0389000	2.33446	1.31649e-06	7.91599e-05	up	Centrin.
Os10g0389100	3.6838	1.56955e-06	9.05307e-05	up	Red chlorophyll catabolite reductase Truncated copy of OsRCCR1
Os10g0389200	3.3873	2.56064e-06	0.000134003	up	Red chlorophyll catabolite reductase Leaf senescence Wound responses
Os10g0389200	2.28766	1.84345e-06	0.000103273	up	Red chlorophyll catabolite reductase Leaf senescence Wound responses
Os10g0392400	3.64204	1.32735e-06	7.96695e-05	up	Tify domain containing protein.
Os10g0393800	3.60679	6.78812e-07	4.75551e-05	up	Lipase GDSL domain containing protein.
Os10g0394400	23.6316	2.39175e-06	0.000127164	up	Non-protein coding transcript.
Os10g0409400	2.91008	1.23171e-07	1.30254e-05	up	beta subunit of polygalacturonase C Abiotic stress response
Os10g0415300	5.3727	3.22861e-07	2.70355e-05	up	Glutathione reductase Salt tolerance
Os10g0450800	2.57574	1.18445e-06	7.28824e-05	up	Hypothetical protein.
Os10g0456800	2.53187	2.4315e-06	0.000128872	up	CHY zinc finger family protein expressed.
Os10g0461100	2.03816	1.5458e-06	8.95151e-05	up	PsbP family protein expressed.
Os10g0463800	3.58406	1.61841e-07	1.60508e-05	up	Domain of unknown function DUF1338 containing green-plant-unique protein Regulation of starch synthesis and amyloplast development Peripheral endosperm development
Os10g0463800	2.91924	3.69699e-07	2.99722e-05	up	Domain of unknown function DUF1338 containing green-plant-unique protein Regulation of starch synthesis and amyloplast development Peripheral endosperm development
Os10g0463800	4.46874	1.25321e-06	7.6193e-05	up	Domain of unknown function DUF1338 containing green-plant-unique protein Regulation of starch synthesis and amyloplast development Peripheral endosperm development
Os10g0464800	4.57692	9.005e-06	0.000379697	up	Zinc finger RING-type domain containing protein.
Os10g0465950	3.30225	6.69445e-06	0.000295351	up	Hypothetical conserved gene.
Os10g0479700	2.02567	4.53429e-06	0.00021379	up	Integral membrane protein like.
Os10g0490800	2.31941	5.32688e-07	3.95183e-05	up	Secretory protein.
Os10g0491000	3.0456	6.71343e-08	8.17503e-06	up	Plant Basic Secretory Protein family protein.
Os10g0492500	3.06425	2.48543e-07	2.21879e-05	up	Tonoplast membrane integral protein ZmTIP3-1.
Os10g0504900	7.52679	9.59396e-08	1.07962e-05	up	Lipid transfer protein.
Os10g0505900	11.6529	6.95897e-06	0.00030537	up	Conserved hypothetical protein.
Os10g0516300	2.10624	1.37739e-06	8.18935e-05	up	ETFQO (electron-transfer flavoprotein:ubiquinone oxidoreductase)%3B catalytic/ electron carrier/ electron-transferring-flavoprotein dehydrogenase.
Os10g0517500	2.38192	6.58307e-06	0.000291283	up	Cys/Met metabolism pyridoxal phosphate-dependent enzyme domain containing protein.
Os10g0520700	2.05244	1.44086e-08	2.34933e-06	up	Zinc finger HIT-type domain containing protein.
Os10g0521000	4.82124	3.71964e-07	3.01039e-05	up	TRE1 protein (Fragment).
Os10g0521000	13.2985	1.03079e-07	1.13996e-05	up	TRE1 protein (Fragment).
Os10g0521000	4.85294	7.05231e-07	4.88715e-05	up	TRE1 protein (Fragment).
Os10g0523900	8.28414	1.7396e-08	2.74333e-06	up	AP2 domain containing protein.
Os10g0524300	3.26343	2.1096e-11	4.17983e-08	up	Peptidoglycan-binding lysin domain domain containing protein.
Os10g0524400	2.39665	3.71177e-07	3.00689e-05	up	Phospholipase D domain containing protein.
Os10g0528100	2.69837	7.13407e-07	4.93248e-05	up	Glutathione S-transferase GST 42 (EC 2.5.1.18) (Fragment).
Os10g0535800	7.23551	7.13639e-12	3.80154e-08	up	Protein of unknown function Cys-rich domain containing protein.
Os10g0542100	4.48184	4.96443e-07	3.74133e-05	up	Plant EC metallothionein-like protein family 15 protein.
Os10g0544900	2.21937	2.71691e-07	2.3802e-05	up	Protein phosphatase 2C-like protein.
Os10g0546400	4.67655	5.54216e-08	7.02389e-06	up	Conserved hypothetical protein.
Os10g0548100	11.2877	3.75091e-07	3.03106e-05	up	DM280 protein.
Os10g0552300	6.64314	8.70282e-08	1.00559e-05	up	Conserved hypothetical protein.
Os10g0552400	2.84699	1.10704e-07	1.20258e-05	up	Zinc finger RING/FYVE/PHD-type domain containing protein.
Os10g0558400	69	5.95737e-06	0.000268463	up	Oxidoreductase 2OG-Fe oxygenase family protein.
Os10g0558600	3.63347	1.19717e-06	7.34618e-05	up	Pentatricopeptide repeat domain containing protein.
Os10g0558700	2.10775	1.18993e-06	7.31766e-05	up	Oxidoreductase 2OG-Fe oxygenase family protein expressed.
Os10g0560451	2.24816	7.1107e-07	4.91975e-05	up	Hypothetical gene.
Os10g0561500	2.37867	2.46129e-06	0.000130174	up	Serine/threonine protein kinase-related domain containing protein.
Os10g0565150	4.22081	3.82548e-06	0.000185372	up	Hypothetical gene.
Os10g0565200	4.36495	8.09804e-07	5.41822e-05	up	Hypothetical conserved gene.
Os10g0565300	2.57118	6.33833e-07	4.51674e-05	up	Vacuolar protein sorting-associated protein 62 domain containing protein.
Os10g0572300	2.63238	3.50073e-06	0.000172523	up	Protein lap4.
Os10g0572300	2.9525	1.15561e-06	7.14928e-05	up	Protein lap4.
Os10g0577100	3.07287	4.08787e-06	0.000195488	up	Conserved hypothetical protein.
Os11g0116550	3.8757	7.30831e-07	5.01686e-05	up	predicted protein.
Os11g0126900	3.12963	8.13095e-06	0.000348859	up	NAC-domain protein Drought tolerance
Os11g0129800	2.96419	3.02469e-12	2.72087e-08	up	Hypothetical conserved gene.
Os11g0133001	2.49216	6.23565e-08	7.70869e-06	up	Ser/Thr protein kinase (Fragment).
Os11g0135900	2.31415	1.5379e-08	2.48456e-06	up	carbohydrate transporter/ sugar porter/ transporter.
Os11g0135900	4.43404	3.38525e-06	0.000167849	up	carbohydrate transporter/ sugar porter/ transporter.
Os11g0141400	2.84505	7.09315e-07	4.91062e-05	up	EF hand family protein expressed.
Os11g0147150	4.5698	7.40586e-09	1.33923e-06	up	Hypothetical gene.
Os11g0147150	2.55962	1.26154e-10	6.79506e-08	up	Hypothetical gene.
Os11g0148101	2.0003	6.20483e-08	7.67731e-06	up	Hypothetical conserved gene.
Os11g0148400	4.07143	8.27188e-07	5.50664e-05	up	Conserved hypothetical protein.
Os11g0151400	3.72513	3.24779e-07	2.71746e-05	up	Cytochrome P450 family protein.
Os11g0151400	5.5251	3.38356e-07	2.80167e-05	up	Cytochrome P450 family protein.
Os11g0151800	6.90233	3.13846e-07	2.64654e-05	up	ATPAP18/PAP18.
Os11g0151800	5.7993	1.21638e-06	7.43924e-05	up	ATPAP18/PAP18.
Os11g0151800	5.63438	1.15022e-06	7.12381e-05	up	ATPAP18/PAP18.
Os11g0154900	7.28981	2.13422e-07	1.97662e-05	up	DNA-binding factor of bZIP class (Fragment).
Os11g0154900	7.29281	3.47615e-07	2.86041e-05	up	DNA-binding factor of bZIP class (Fragment).
Os11g0160100	2.39362	8.76061e-07	5.76034e-05	up	Zinc finger RING/FYVE/PHD-type domain containing protein.
Os11g0160100	2.8855	5.68262e-08	7.16325e-06	up	Zinc finger RING/FYVE/PHD-type domain containing protein.
Os11g0160100	2.30116	1.49616e-06	8.71059e-05	up	Zinc finger RING/FYVE/PHD-type domain containing protein.
Os11g0160400	11.6628	3.14598e-07	2.65169e-05	up	Conserved hypothetical protein.
Os11g0168500	11.6861	2.6559e-08	3.89756e-06	up	Hypothetical conserved gene.
Os11g0168500	18.0847	3.28937e-08	4.64035e-06	up	Hypothetical conserved gene.
Os11g0181200	9.1411	1.40672e-07	1.44286e-05	up	Hypothetical protein.
Os11g0181500	2.09077	2.78867e-08	4.06279e-06	up	Nitrogen fixation like protein.
Os11g0181800	2.35636	3.74576e-12	3.10524e-08	up	Short-chain dehydrogenase Tic32.
Os11g0181900	2.85084	3.86211e-06	0.000186794	up	Prefoldin domain containing protein.
Os11g0186300	88.2	5.28737e-07	3.93011e-05	up	Ankyrin-like protein.
Os11g0186300	206.6	1.84771e-09	4.12674e-07	up	Ankyrin-like protein.
Os11g0195600	3.17419	1.21072e-06	7.41428e-05	up	Amino acid carrier (Fragment).
Os11g0195600	3.31673	4.56065e-06	0.000214865	up	Amino acid carrier (Fragment).
Os11g0199700	3.04345	1.35185e-08	2.23087e-06	up	Seed protein B32E (Fragment).
Os11g0209700	4.54821	1.38397e-07	1.42332e-05	up	Conserved hypothetical protein.
Os11g0213700	2.45534	1.37955e-08	2.26421e-06	up	Leucine-rich repeat typical subtype containing protein.
Os11g0213733	2.17632	1.17536e-06	7.24389e-05	up	Conserved hypothetical protein.
Os11g0213800	3.12301	3.21086e-06	0.000160539	up	NBS-LRR disease resistance protein homologue (Fragment).
Os11g0225100	3.10134	1.3352e-06	7.99956e-05	up	NB-ARC domain containing protein expressed.
Os11g0242300	5.04244	9.03338e-07	5.89932e-05	up	AP2 domain containing protein expressed.
Os11g0242600	2.26939	1.20748e-09	2.88099e-07	up	Protein of unknown function DUF579 plant family protein.
Os11g0248200	2.20622	8.15594e-08	9.57049e-06	up	Nucleotide-binding alpha-beta plait domain containing protein.
Os11g0275400	2.18145	1.43292e-06	8.44352e-05	up	Pentatricopeptide repeat domain containing protein.
Os11g0296500	2.10181	1.06509e-06	6.69496e-05	up	Zinc finger CCHC retroviral-type domain containing protein.
Os11g0303600	11.0326	3.90891e-08	5.31625e-06	up	Herbicide safener binding protein.
Os11g0303600	7.99359	1.15795e-06	7.16266e-05	up	Herbicide safener binding protein.
Os11g0303600	8.17284	2.34512e-06	0.000125172	up	Herbicide safener binding protein.
Os11g0303800	2.93321	1.0232e-07	1.13483e-05	up	Hypothetical protein.
Os11g0303800	4.82537	5.43376e-06	0.000248845	up	Hypothetical protein.
Os11g0303800	6.39633	2.46758e-07	2.20658e-05	up	Hypothetical protein.
Os11g0384789	4.85105	1.00126e-06	6.39174e-05	up	Hydrolase.
Os11g0427700	91.8	2.38303e-07	2.14869e-05	up	Xanthine/uracil/vitamin C permease family protein.
Os11g0427700	129.8	1.5498e-09	3.5476e-07	up	Xanthine/uracil/vitamin C permease family protein.
Os11g0434000	8.80714	5.67155e-06	0.000257891	up	HAD-superfamily phosphatase subfamily IIIC domain containing protein.
Os11g0451700	10.4285	2.08306e-06	0.000113771	up	Dehydrin DHN1 (M3) (RAB-17 protein).
Os11g0453900	20.4078	8.59549e-07	5.67826e-05	up	Dehydrin RAB 16D.
Os11g0454000	15.5229	1.9305e-06	0.000107126	up	Dehydrin RAB 16C.
Os11g0454000	52.0529	2.50611e-08	3.71124e-06	up	Dehydrin RAB 16C.
Os11g0454300	5.07075	4.67242e-09	9.05341e-07	up	Water-stress inducible protein RAB21.
Os11g0484000	2.00489	3.71051e-07	3.00645e-05	up	Class II aldolase/adducin N-terminal family protein.
Os11g0490100	7.33282	1.31886e-07	1.37137e-05	up	Protein of unknown function DUF579 plant family protein.
Os11g0490900	2.73388	1.16414e-06	7.18837e-05	up	WRKY transcription factor 72.
Os11g0490900	2.21807	6.8589e-07	4.7908e-05	up	WRKY transcription factor 72.
Os11g0491400	2.8831	3.11723e-07	2.63428e-05	up	Conserved hypothetical protein.
Os11g0491400	2.00207	2.66473e-09	5.59118e-07	up	Conserved hypothetical protein.
Os11g0491400	2.12975	4.9378e-07	3.72651e-05	up	Conserved hypothetical protein.
Os11g0503400	5.17409	9.72657e-11	5.96354e-08	up	Conserved hypothetical protein.
Os11g0533100	2.32353	9.61066e-07	6.19121e-05	up	CarD-like transcriptional regulator family protein expressed.
Os11g0533400	10.9478	9.60053e-07	6.18657e-05	up	Conserved hypothetical protein.
Os11g0540100	8.78814	5.50695e-06	0.000251706	up	Xaa-Pro aminopeptidase 2 (EC 3.4.11.9).
Os11g0547000	8.45087	6.87153e-07	4.79725e-05	up	Hypothetical conserved gene.
Os11g0555300	3.22754	2.61239e-06	0.000136172	up	Rp1-like protein.
Os11g0556400	2.04138	3.81793e-07	3.07113e-05	up	Serine/threonine protein kinase-related domain containing protein.
Os11g0573350	3.70564	3.53686e-07	2.89797e-05	up	photoperiod responsive protein.
Os11g0582000	2.43369	3.84038e-09	7.63723e-07	up	Hypothetical conserved gene.
Os11g0582300	3.75312	4.83592e-08	6.31823e-06	up	GTP-binding protein-like%3B root hair defective 3 protein-like.
Os11g0591000	5.28247	2.40051e-06	0.000127501	up	NB-ARC domain containing protein.
Os11g0592000	3.98884	1.27999e-07	1.33919e-05	up	Barwin.
Os11g0592200	3.74512	1.43594e-07	1.4669e-05	up	Chitin-binding allergen Bra r 2 (Fragments).
Os11g0592700	3.47233	3.55955e-06	0.00017479	up	GTP1/OBG domain containing protein.
Os11g0595400	10.2009	2.30764e-08	3.46835e-06	up	Small secreted protein containing CLE domain Regulation of meristem maintenance
Os11g0597700	3.83382	2.10368e-06	0.000114659	up	Resistant protein.
Os11g0597700	17.975	2.71194e-09	5.67895e-07	up	Resistant protein.
Os11g0601950	5.03444	3.54333e-07	2.90214e-05	up	cDNA clone:002-114-B06 full insert sequence.
Os11g0601950	4.24212	2.1302e-11	4.18897e-08	up	cDNA clone:002-114-B06 full insert sequence.
Os11g0605500	2.06255	1.28467e-06	7.76146e-05	up	Acyl-CoA oxidase.
Os11g0616900	3.24908	1.14778e-08	1.94902e-06	up	Hypothetical protein.
Os11g0618600	18.6842	9.5189e-06	0.000397678	up	Tyrosine protein kinase domain containing protein.
Os11g0621300	3.27655	2.88314e-07	2.48362e-05	up	Protein of unknown function DUF1399 family protein.
Os11g0629100	2.58409	1.04317e-06	6.59154e-05	up	Conserved hypothetical protein.
Os11g0634200	2.72727	7.42775e-06	0.000322487	up	Conserved hypothetical protein.
Os11g0642900	3.66364	7.13763e-07	4.93333e-05	up	Hypothetical protein.
Os11g0643600	6.33298	3.12019e-10	1.10367e-07	up	Hypothetical conserved gene.
Os11g0648000	2.33268	1.56658e-06	9.04087e-05	up	Sodium/hydrogen exchanger.
Os11g0649900	10.6538	7.17077e-09	1.30397e-06	up	Exo70 exocyst complex subunit family protein.
Os11g0650700	31.8936	5.85751e-09	1.09558e-06	up	Exo70 exocyst complex subunit family protein.
Os11g0652100	3.66403	9.08155e-08	1.03857e-05	up	NB-ARC domain containing protein.
Os11g0659200	9.65416	1.12586e-06	7.00209e-05	up	Protein of unknown function DUF581 family protein.
Os11g0684000	3.97054	2.09915e-07	1.95227e-05	up	Transcription factor MYB21 (Myb-related protein 21) (AtMYB21) (Myb homolog 3) (AtMyb3).
Os11g0700900	4.53363	1.76996e-06	9.96833e-05	up	Class III chitinase homologue (OsChib3H-b).
Os11g0701000	8.08081	4.5868e-08	6.04681e-06	up	Class III chitinase homologue (OsChib3H-c).
Os11g0701900	7.05769	5.57992e-09	1.05272e-06	up	Glycoside hydrolase family 18 protein.
Os11g0702100	3.00731	9.71769e-07	6.24777e-05	up	Class III chitinase homologue (OsChib3H-h) (Fragment).
Os11g0704500	2.51625	4.32504e-07	3.3636e-05	up	Metallothionein-like protein type 1.
Os11g0707100	3.94326	3.06502e-07	2.60004e-05	up	Hypothetical conserved gene.
Os12g0110300	2.73758	4.19809e-07	3.28748e-05	up	cDNA clone: J065191E12 full insert sequence.
Os12g0115950	3.30522	3.48907e-06	0.000172117	up	Conserved hypothetical protein.
Os12g0116400	2.1586	7.78503e-07	5.25872e-05	up	WRKY DNA binding domain containing protein expressed.
Os12g0123700	2.30883	7.67406e-06	0.000331988	up	NAC domain containing transcription factor Abiotic and biotic stress response
Os12g0146400	2.47767	8.57497e-06	0.000364436	up	Conserved hypothetical protein.
Os12g0147200	11.8994	3.63339e-06	0.000177694	up	Conserved hypothetical protein.
Os12g0150200	12.6894	3.58419e-08	4.95216e-06	up	Cytochrome P450 enzyme Salt tolerance
Os12g0152700	2.68193	7.19325e-12	3.80154e-08	up	ACT domain containing protein.
Os12g0152750	9.83654	6.73327e-07	4.72473e-05	up	Hypothetical gene.
Os12g0153200	4.34939	1.33582e-07	1.38387e-05	up	Conserved hypothetical protein.
Os12g0158800	3.13396	8.16842e-06	0.000350054	up	E2F homolog (Fragment).
Os12g0168100	5.47602	6.34043e-07	4.51742e-05	up	AP2 domain containing protein RAP2.6 (Fragment).
Os12g0168100	6.13532	2.0845e-07	1.94377e-05	up	AP2 domain containing protein RAP2.6 (Fragment).
Os12g0168150	5.56657	2.11534e-08	3.22984e-06	up	Hypothetical gene.
Os12g0187800	14.9423	1.58923e-08	2.55285e-06	up	Conserved hypothetical protein.
Os12g0187800	6.90432	4.4923e-06	0.000212118	up	Conserved hypothetical protein.
Os12g0187800	14.2814	1.66009e-08	2.64956e-06	up	Conserved hypothetical protein.
Os12g0187800	12.3945	1.33611e-07	1.38387e-05	up	Conserved hypothetical protein.
Os12g0224000	2.76464	6.34906e-07	4.51982e-05	up	Diacylglycerol kinase 1 (EC 2.7.1.107) (Diglyceride kinase 1) (DGK 1) (DAG kinase 1).
Os12g0242500	2.33332	6.05077e-06	0.000272063	up	Conserved hypothetical protein.
Os12g0255850	16.4821	6.59905e-09	1.21305e-06	up	Conserved hypothetical protein.
Os12g0257600	2.28154	2.77418e-06	0.000142845	up	Laccase-25.
Os12g0258700	2.34731	2.31216e-07	2.09866e-05	up	Cupredoxin domain containing protein.
Os12g0258700	2.39091	5.97251e-06	0.000268973	up	Cupredoxin domain containing protein.
Os12g0267064	2.03642	1.96226e-06	0.00010849	up	NADP-dependant malate dehydrogenase (Fragment).
Os12g0281300	82	9.91067e-07	6.341e-05	up	NB-ARC domain protein.
Os12g0297500	2.27623	2.4605e-09	5.21441e-07	up	Phosphoglucan water dikinase chloroplastic.
Os12g0428000	3.01416	4.69621e-06	0.000220416	up	senescence-associated protein DIN1.
Os12g0428600	2.36494	2.39215e-06	0.000127169	up	predicted protein.
Os12g0437800	4.17816	1.13738e-06	7.05574e-05	up	MPI.
Os12g0440300	4.34799	7.35173e-08	8.8102e-06	up	Conserved hypothetical protein.
Os12g0448900	2.16571	3.80119e-06	0.000184407	up	Fatty acid alpha-dioxygenase family Enzyme that oxygenates fatty acids into 2R-hydroperoxides
Os12g0448900	2.75243	4.07705e-07	3.22133e-05	up	Fatty acid alpha-dioxygenase family Enzyme that oxygenates fatty acids into 2R-hydroperoxides
Os12g0448900	2.12477	1.07058e-06	6.71559e-05	up	Fatty acid alpha-dioxygenase family Enzyme that oxygenates fatty acids into 2R-hydroperoxides
Os12g0448900	2.35094	5.50304e-07	4.04843e-05	up	Fatty acid alpha-dioxygenase family Enzyme that oxygenates fatty acids into 2R-hydroperoxides
Os12g0476200	3.59181	1.85435e-07	1.78141e-05	up	Sucrose transporter TAL effector PthXo2-dependent disease susceptibility to bacterial pathogen
Os12g0476200	2.63362	3.05619e-06	0.000154238	up	Sucrose transporter TAL effector PthXo2-dependent disease susceptibility to bacterial pathogen
Os12g0478200	9.10497	2.69413e-08	3.94871e-06	up	GRAM domain containing protein.
Os12g0478200	9.11175	1.06738e-06	6.70449e-05	up	GRAM domain containing protein.
Os12g0478200	6.78304	3.3533e-06	0.000166521	up	GRAM domain containing protein.
Os12g0491800	4.6439	4.29426e-07	3.34729e-05	up	Ent-kaurene synthase 1A.
Os12g0491800	69.5	6.67086e-06	0.000294433	up	Ent-kaurene synthase 1A.
Os12g0491800	4.69383	4.03351e-07	3.19529e-05	up	Ent-kaurene synthase 1A.
Os12g0510750	7.18612	6.83295e-07	4.77686e-05	up	Conserved hypothetical protein.
Os12g0530300	8.81176	8.79177e-08	1.01255e-05	up	Hypothetical conserved gene.
Os12g0547600	3.60932	1.1026e-07	1.19943e-05	up	Hypothetical conserved gene.
Os12g0552400	4.48888	7.20083e-08	8.66621e-06	up	Rossmann-like alpha/beta/alpha sandwich fold domain containing protein.
Os12g0564100	3.03259	3.6411e-07	2.9633e-05	up	Myb-like DNA-binding domain containing protein expressed.
Os12g0574400	2.03485	1.88707e-07	1.80343e-05	up	BPM.
Os12g0577100	2.73286	2.01902e-09	4.44362e-07	up	Nucleotide-binding alpha-beta plait domain containing protein.
Os12g0582800	2.1183	2.22618e-06	0.000119899	up	Protein of unknown function DUF221 domain containing protein.
Os12g0583700	23.1194	1.82519e-08	2.86123e-06	up	Zinc finger C2H2-type domain containing protein.
Os12g0583700	3.47552	2.48285e-06	0.000131052	up	Zinc finger C2H2-type domain containing protein.
Os12g0586100	2.08588	1.15225e-06	7.13163e-05	up	Serine/threonine protein kinase Abscisic acid (ABA)-activated protein kinase Hyperosmotic stress response ABA signal transduction
Os12g0594000	2.80816	4.54975e-06	0.000214397	up	WD40 repeat-like domain containing protein.
Os12g0600100	2.20523	1.35059e-07	1.39476e-05	up	Tetratricopeptide-like helical domain containing protein.
Os12g0624300	2.94258	3.60815e-06	0.000176827	up	Hypothetical protein.
Os12g0626500	2.64395	1.35009e-07	1.39459e-05	up	late embryogenesis abundant protein D-34.
Os12g0630200	2.51039	6.93345e-07	4.8289e-05	up	Thaumatin pathogenesis-related family protein.
Os12g0632800	2.2637	2.85921e-06	0.000146243	up	Protein kinase catalytic domain domain containing protein.
Os12g0633600	2.21144	2.53684e-06	0.000133005	up	Protein of unknown function DUF221 domain containing protein.
Os12g0635400	3.6094	1.97735e-06	0.000109182	up	VQ domain containing protein.
