# Supplementary material for: Global N6-Methyladenosine Profiling Revealed the Tissue-Specific Epitranscriptomic Regulation of Rice Responses to Salt Stress
Source: Int J Mol Sci. 2022 Feb 14;23(4):2091. doi: 10.3390/ijms23042091 (PMC8875919; doi:10.3390/ijms23042091)
Supplement: Supplementary file 1 [file ijms-23-02091-s001.zip › Table S6_List of genes with increased m6A in roots and decressed m6A in shoots of FL478 under salt stress.xlsx]

## Sheet: Table S
Table S6. List of the 42 genes with increased m6A in roots and decressed m6A in shoots of FL478 under salt stress
Gene ID	Function Annotation
Os11g0523110	sex determination protein tasselseed-2,
Os01g0636400	hydrolase
Os05g0384600	white-brown complex homolog protein 16
Os02g0658800	expansin
Os11g0499600	OsHSD1
Os07g0142200	Proline-rich protein
Os02g0129800	UP-9A
Os01g0226200	expressed protein
Os06g0338200	copper methylamine oxidase
Os10g0486100	cytochrome P450
Os06g0154600	dihydroneopterin aldolase
Os01g0215500	GDSL-like lipase/acylhydrolase
Os08g0128000	kelch repeat protein
Os03g0221500	glucan endo-1,3-beta-glucosidase
Os06g0179000	heparanase-like protein
Os04g0642000	ABC transporter
Os12g0569700	OsHSP23.7
Os12g0511200	haemolysin-III
Os05g0579600	MYB family transcription factor
Os03g0314500	WD40-like Beta Propeller Repeat family protein
Os06g0624750	Hypothetical protein
Os07g0510833	monocopper oxidase
Os08g0514100	lectin-like protein kinase
Os06g0478600	polygalacturonase inhibitor 1
Os04g0642100	ATEB1A-like microtubule associated protein
Os03g0773100	myb/SANT domain protein
Os10g0477600	No apical meristem protein
Os04g0137201	pectate lyase precursor
Os05g0477600	OsEXP4
Os07g0658600	eukaryotic aspartyl protease domain containing protein
Os04g0640700	beta-D-xylosidase
Os04g0569400	methyltransferase
Os06g0193200	pectinesterase
Os01g0868900	OsSub11
Os03g0672300	pyruvate kinase
Os01g0932950	Rapid ALkalinization Factor RALF family protein
Os06g0653100	tetraspanin family protein
Os09g0417800	OsWRKY62
Os06g0504900	OsWRKY31
Os05g0322900	OsWRKY45
Os01g0821600	OsWRKY21
Os10g0347000	glucan endo-1,3-beta-glucosidase
