# Supplementary material for: Global N6-Methyladenosine Profiling Revealed the Tissue-Specific Epitranscriptomic Regulation of Rice Responses to Salt Stress
Source: Int J Mol Sci. 2022 Feb 14;23(4):2091. doi: 10.3390/ijms23042091 (PMC8875919; doi:10.3390/ijms23042091)
Supplement: Supplementary file 1 [file ijms-23-02091-s001.zip › Table S7_List of the 19 genes with increased m6A in shoots and decreased m6A in roots of FL478 under salt stress conditions.xlsx]

## Sheet: Table S7
Table S7. List of the 19 genes with increased m6A in shoots and decreased m6A in roots of FL478 under salt stress conditions
Gene ID	Function Annotation
Os07g0565000	40S ribosomal protein S11
Os06g0250600	OsGORK
Os02g0176700	OsACA9
Os08g0109400	OsIAA25 - Auxin-responsive Aux/IAA gene family member
Os05g0381700	expressed protein
Os04g0295500	expressed protein
Os03g0586700	metal ion binding protein
Os07g0459500	F-box domain, Skp2-like domain containing protein
Os06g0486900	erythronate-4-phosphate dehydrogenase
Os11g0592700	GTPase of unknown function domain containing protein
Os04g0583900	OsMYBR1
Os10g0558600	pentatricopeptide
Os06g0654000	ubiquitin carboxyl-terminal hydrolase family protein
Os03g0689100	histidine acid phosphatase
Os04g0316200	cysteine-rich receptor-like protein kinase
Os04g0322100	cysteine-rich receptor-like protein kinase
Os10g0461100	Keratin, type II cytoskeletal 1
Os11g0618600	protein kinase
Os06g0298400	W domain containing protein
