# Supplementary material for: Global N6-Methyladenosine Profiling Revealed the Tissue-Specific Epitranscriptomic Regulation of Rice Responses to Salt Stress
Source: Int J Mol Sci. 2022 Feb 14;23(4):2091. doi: 10.3390/ijms23042091 (PMC8875919; doi:10.3390/ijms23042091)
Supplement: Supplementary file 1 [file ijms-23-02091-s001.zip › Table S8_GO enrichment analysis of the genes with exclusive increase or decrease m6A methylation in shoots or roots under salt stress condition.xlsx]

## Sheet: Table S8
Table S8. GO enrichment analysis of the genes with exclusive increase or decrease m6A methylation in shoots or roots under salt stress condition
GO Term	Description	Shoot-m6A-Increase		Shoot-m6A-Decrease		Root-m6A-Increase		Root-m6A-Decrease
		Num	FDR	Num	FDR	Num	FDR	Num	FDR
GO:0032502	developmental process	13	7.3e-08	6	0.014	10	1.4e-05	---	---
GO:0009719	response to stimulus	12	7.1e-07	9	5.1e-05	13	3.6e-08	---	---
GO:0004872	receptor activity	8	0.0042	18	2.6e-14	8	0.0023	7	0.001
GO:0005886	plasma membrane	15	2.6e-09	7	0.0024	13	1.4e-07	---	---
GO:0009725	response to hormone stimulus	8	0.0021	9	5.1e-05	13	3.6e-08	---	---
GO:0006721	terpenoid metabolic process	6	0.0021	---	---	---	---	---	---
GO:0006355	regulation of transcription	45	0.0059	---	---	---	---	---	---
GO:0019748	secondary metabolic process	10	0.0077	---	---	9	0.02	---	---
GO:0016701	oxidoreductase activity	9	0.0042	---	---	23	2.4e-05	---	---
GO:0009507	chloroplast	10	3.6e-07	---	---	---	---	---	---
GO:0042221	response to chemical stimulus	---	---	21	0.0048	38	1.4e-09	---	---
GO:0005618	cell wall	---	---	8	0.015	16	4.7e-07	---	---
GO:0004871	signal transducer activity	---	---	20	8e-07	---	---	14	0.00059
GO:0071554	cell wall organization or biogenesis	---	---	---	---	32	7.2e-13	---	---
GO:0005975	carbohydrate metabolic process	---	---	---	---	51	0.0011	---	---
GO:0005856	cytoskeleton	---	---	---	---	9	0.0049	---	---
GO:0048046	apoplast	---	---	---	---	9	0.029	---	---
GO:0008026	ATP-dependent helicase activity	---	---	---	---	---	---	9	0.025
