# Supplementary material for: Global N6-Methyladenosine Profiling Revealed the Tissue-Specific Epitranscriptomic Regulation of Rice Responses to Salt Stress
Source: Int J Mol Sci. 2022 Feb 14;23(4):2091. doi: 10.3390/ijms23042091 (PMC8875919; doi:10.3390/ijms23042091)
Supplement: Supplementary file 1 [file ijms-23-02091-s001.zip › Table S9_List of genes with function of transcription and redox regulation identified to be increased m6A methylation in shoots and roots under salt stress.xlsx]

## Sheet: Table S9
Table S9. List of the genes with function of transcription and redox regulation identified to be increased m6A methylation in shoots and roots under salt stress
Gene ID	Function Annotation	Fold Change
Genes with shoot-specific m6A increase
Os11g0533100	CarD-like transcriptional regulator family protein	2.32
Os05g0562400	DDT domain containing protein	2.67
Os08g0564800	OsMED15_2, Coactivator CBP	2.71
Os09g0477900	NusB/RsmB/TIM44 domain containing protein	8.55
Os01g0859300	OsbZIP10, transcription factor	82
Os02g0191600	OsbZIP16, transcription factor	3.95
Os03g0796900	OsbZIP33, transcription factor	2.47
Os05g0569300	OsbZIP45, transcription factor	2.39
Os12g0158800	OsE2F2, transcription factor	3.13
Os09g0457900	OsERF102, transcription factor	14.96
Os02g0764700	OsERF103, transcription factor	6.24
Os08g0474000	OsERF104, transcription factor	18.3
Os11g0168500	OsERF118, transcription factor	11.69
Os12g0168100	OsERF124, transcription factor	5.48
Os02g0797100	OsERF127, transcription factor	6.24
Os01g0165000	OsERF40, transcription factor	3.1
Os08g0565200	OsERF44, transcription factor	7.15
Os05g0572000	OsERF52, transcription factor	2.08
Os04g0610400	OsERF77, transcription factor	2.39
Os02g0654700	OsERF91, transcription factor	2.96
Os02g0655200	OsERF95, transcription factor	3.05
Os01g0868000	OsERF99, transcription factor	4.74
Os11g0547000	OsFKF1, F-box protein	8.45
Os01g0923700	OsHK3, His kinase 3	2.72
Os03g0198600	OsHox12, transcription factor	6.39
Os03g0745000	OsHsfA2a, transcription factor	2.6
Os01g0733200	OsHsfC1b, transcription factor	5.44
Os05g0559400	OsIAA19, Auxin-responsive protein	2.44
Os01g0741900	OsIAA6, Auxin-responsive protein	2.15
Os06g0702600	OsARF19, transcription factor	2.34
Os02g0579600	OsMADS27, transcription factor	7.34
Os08g0112700	OsMADS26, transcription factor	2.23
Os03g0224200	OsRR21, B-type response regulator	2.12
Os03g0402800	OsTIFY10a, transcription factor	2.36
Os03g0181100	OsTIFY11b, transcription factor	4.33
Os03g0180900	OsTIFY11c, transcription factor	5.28
Os04g0395800	OsTIFY9, transcription factor	14.78
Os07g0684900	OsWOX11, transcription factor	4.64
Os01g0246700	OsWRKY1, transcription factor	2.13
Os01g0734000	OsWRKY23, transcription factor	2.27
Os01g0826400	OsWRKY24, transcription factor	2.29
Os02g0462800	OsWRKY42, transcription factor	107.7
Os03g0321700	OsWRKY55, transcription factor	2.22
Os05g0537100	OsWRKY7, transcription factor	2.2
Os11g0490900	OsWRKY72, transcription factor	2.73
Os02g0771600	OsACO3, ACC oxidase	2.09
Os03g0289800	Os2ODD8, leucoanthocyanidin dioxygenase	5.26
Os03g0708100	OMT7, Phytanoyl-CoA dioxygenase	2.48
Os06g0103300	homogentisate 1,2-dioxygenase	2.25
Os07g0169600	Os2ODD7, 2-oxoglutarate-dependent dioxygenase 7	2.46
Os08g0508800	OsLOX7, Type 2 13-lipoxygenase	5.32
Os08g0509100	OsLOX8, Lipoxygenase	4.25
Os10g0558400	Oxidoreductase	69
Os10g0558700	Oxidoreductase	2.11
Genes with root-specific m6A increase
Os01g0327100	peroxidase	4.81
Os01g0263000	peroxidase	5.36
Os01g0270300	peroxidase	2.2
Os01g0855200	peroxidase	2.3
Os01g0962700	peroxidase	2.08
Os03g0368000	peroxidase	2.76
Os03g0563600	peroxidase	2.17
Os03g0762400	peroxidase	3.25
Os05g0134700	peroxidase	3.06
Os05g0135000	peroxidase	4.1
Os05g0135500	peroxidase	3.01
Os05g0162000	peroxidase	2.12
Os05g0528000	OsNox5, NADPH oxidase	2.18
Os06g0274800	peroxidase	3.52
Os06g0490400	peroxidase	5.26
Os07g0531400	peroxidase	5.91
Os07g0639000	peroxidase	6.16
Os07g0677100	peroxidase	3.04
Os07g0677600	peroxidase	3.42
Os10g0566800	peroxidase	2.81
Os11g0112400	peroxidase	5.24
Os12g0112000	peroxidase	9.49
Os12g0541300	OsNox9, NADPH oxidase	8.24
