# Supplementary material for: Global N6-Methyladenosine Profiling Revealed the Tissue-Specific Epitranscriptomic Regulation of Rice Responses to Salt Stress
Source: Int J Mol Sci. 2022 Feb 14;23(4):2091. doi: 10.3390/ijms23042091 (PMC8875919; doi:10.3390/ijms23042091)
Supplement: Supplementary file 1 [file ijms-23-02091-s001.zip › Table S10_ List of the genes with function of phytohormone reponse identified to be increased m6A methylation in shoots or roots under salt stress.xlsx]

## Sheet: Table S10
Table S10. List of the genes with function of phytohormone reponse identified to be increased m6A methylation in shoots or roots under salt stress
Gene ID	Function Annotation	Fold Change
Genes with root-specific m6A increase
Os01g0288200	expressed protein	2.61
Os01g0952500	OsRR4, A-type response regulator	3.86
Os02g0228900	OsIAA7, Auxin-responsive protein	2.71
Os02g0723400	OsIAA8 - Auxin-responsive Aux/IAA gene	4.61
Os03g0797800	OsIAA14 - Auxin-responsive Aux/IAA gene	3.81
Os04g0461300	OsMADS61	2.29
Os04g0608300	OsSAUR20 - Auxin-responsive SAUR gene	4.19
Os04g0662200	OsSAUR22 - Auxin-responsive SAUR gene	3.41
Os04g0673300	OsRR6, A-type response regulator	3.03
Os05g0138000	expressed protein	2.42
Os05g0245300	OsBLE3, brassinolide-enhanced 3	4.58
Os06g0597000	OsIAA23, Auxin-responsive Aux/IAA gene	2.54
Os07g0592600	OsMGH3, Auxin signaling and defense signaling	2.08
Genes with shoot-specific m6A increase
Os02g0551100	OsSAPK6, Serine/threonine-protein kinase	2.01
Os01g0719000	auxin responsive	5.68
Os01g0741900	OsIAA6, Auxin-responsive protein	2.15
Os01g0859300	OsABI5, Stress response and ABA signal transduction	82
Os03g0390200	OsSAPK1	2.42
Os05g0559400	OsIAA19 - Auxin-responsive Aux/IAA gene	2.44
Os06g0702600	OsARF19, auxin response factor	2.34
Os12g0586100	OsSAPK9 Serine/threonine-protein kinase	2.09
Genes with root-specific m6A decrease
Os02g0445100	OsSAUR8 - Auxin-responsive SAUR gene	2.19
Os02g0628600	OsARF8, auxin response factor	2.07
Os02g0769100	OsSAUR12 - Auxin-responsive SAUR gene	2.04
Os03g0633500	OsIAA11, Aux/IAA family protein	2.51
Os04g0432000	OsSAPK7, Serine/threonine-protein kinase	4.96
Os05g0447200	OsAUX3, Auxin influx carrier	3.1
Os05g0515400	OsARF14, Auxin response factor	2.31
Os06g0166500	OsIAA20, Auxin-responsive protein	3.33
Os07g0568400	HVA22, TB2/DP1 and HVA22 related protein	2.21
