# Supplementary material for: Global N6-Methyladenosine Profiling Revealed the Tissue-Specific Epitranscriptomic Regulation of Rice Responses to Salt Stress
Source: Int J Mol Sci. 2022 Feb 14;23(4):2091. doi: 10.3390/ijms23042091 (PMC8875919; doi:10.3390/ijms23042091)
Supplement: Supplementary file 1 [file ijms-23-02091-s001.zip › Table S11_ List of the differentially expressed genes with increased or decreased m6A methylation in shoots and roots of FL478 under salt stress conditions.xlsx]

## Sheet: Table S11
Table S11. List of the differentially expressed genes with increased or decreased m6A methylation in shoots and roots of FL478 under salt stress conditions
Peak ID	m6A FC	mRNA log2FC	Gene ID	Gene Function Annotation
The up-regulated genes with increased m6A methylation in shoots
diffreps_peak_3409	12.8238	7.29854	Os01g0162500	Leucine-rich repeat-containing N-terminal type 2 domain containing protein.
diffreps_peak_3411	8.53964	7.29854	Os01g0162500	Leucine-rich repeat-containing N-terminal type 2 domain containing protein.
diffreps_peak_3413	22.3158	6.79591	Os01g0162900	Hypothetical protein.
diffreps_peak_12166	3.86876	1.79945	Os01g0332150	Hypothetical protein.
diffreps_peak_19958	2.66539	5.73116	Os01g0609900	PDR-like ABC transporter, OsABCG37
diffreps_peak_19952	6.71429	5.73116	Os01g0609900	PDR-like ABC transporter
diffreps_peak_19955	3.09109	5.73116	Os01g0609900	PDR-like ABC transporter
diffreps_peak_20259	6.80751	6.92663	Os01g0615050	Proteinase inhibitor I13 potato inhibitor I family protein.
diffreps_peak_20261	8.02899	6.92663	Os01g0615050	Proteinase inhibitor I13 potato inhibitor I family protein.
diffreps_peak_25118	2.65719	6.3594	Os01g0706600	Conserved hypothetical protein.
diffreps_peak_26945	2.15255	6.71189	Os01g0741900	Auxin-responsive protein, OsIAA6
diffreps_peak_29518	2.26447	-6.231	Os01g0783500	Rossmann-like alpha/beta/alpha sandwich fold domain containing protein.
diffreps_peak_32486	3.18993	-6.56433	Os01g0839100	Zinc finger C2H2 domain containing protein, OsZFP179.
diffreps_peak_33916	4.49153	7.23556	Os01g0863300	MCB2 protein.
diffreps_peak_33915	6.0689	7.23556	Os01g0863300	MCB2 protein.
diffreps_peak_40113	6.25645	-5.99169	Os01g0971800	Two-component response regulator ARR11, OsPCL1
diffreps_peak_45731	2.0711	6.54198	Os02g0179600	Uncharacterized conserved protein
diffreps_peak_46432	4.17273	6.53132	Os02g0191300	Amino acid transporter-like protein, OsATL6
diffreps_peak_47949	5.15556	2.25424	Os02g0218750	Hypothetical protein.
diffreps_peak_49609	127.8	8.56177	Os02g0257250	Hypothetical gene.
diffreps_peak_56942	11.6497	3.82876	Os02g0527100	DEAD-like helicase N-terminal domain containing protein, OsDLN56
diffreps_peak_56945	13.3401	3.82876	Os02g0527100	DEAD-like helicase N-terminal domain containing protein.
diffreps_peak_56941	8.86179	3.82876	Os02g0527100	DEAD-like helicase N-terminal domain containing protein.
diffreps_peak_57418	2.20412	6.58074	Os02g0537000	Pectinesterase inhibitor domain containing protein.
diffreps_peak_64377	2.53297	8.29307	Os02g0671100	Cyclin-like F-box domain containing protein, OsFbox104
diffreps_peak_68231	3.29375	6.54814	Os02g0740700	Peptidase M10A and M12B matrixin and adamalysin family protein, OsMMP1
diffreps_peak_76297	13.6938	-7.90452	Os03g0133650	Hypothetical gene.
diffreps_peak_79420	2.1764	4.28073	Os03g0191850	Hypothetical gene.
diffreps_peak_93008	2.30697	6.7753	Os03g0441000	Transcription initiation factor TFIID component
diffreps_peak_99747	3.53573	1.54545	Os03g0689350	Hypothetical protein.
diffreps_peak_106356	2.04877	6.48365	Os03g0803800	Conserved hypothetical protein.
diffreps_peak_106353	2.49795	6.48365	Os03g0803800	Conserved hypothetical protein.
diffreps_peak_130418	2.11865	7.62949	Os04g0564700	OSIGBa0158F05.3 protein.
diffreps_peak_132291	2.16784	7.28415	Os04g0602800	B0403H10-OSIGBa0105A11.22 protein.
diffreps_peak_141320	6.42579	4.89288	Os05g0148950	Hypothetical protein.
diffreps_peak_142751	3.97509	1.90499	Os05g0172000	Conserved hypothetical protein, OsFbox249
diffreps_peak_142750	4.04809	1.90499	Os05g0172000	Conserved hypothetical protein.
diffreps_peak_153682	4.8719	6.60759	Os05g0410500	TGF-beta receptor type I/II extracellular region family protein.
diffreps_peak_156017	2.20668	5.99418	Os05g0461600	SIK1 protein
diffreps_peak_156302	3.33015	6.62807	Os05g0468800	Phosphatidylethanolamine-binding protein PEBP domain containing protein.
diffreps_peak_159933	3.19211	6.76069	Os05g0537300	Unconventional myosin heavy chain.
diffreps_peak_161776	3.30212	6.67593	Os05g0573300	CTP synthase 1
diffreps_peak_161778	2.82445	6.67593	Os05g0573300	CTP synthase 1
diffreps_peak_161777	3.21178	1.71157	Os05g0573400	Hypothetical protein.
diffreps_peak_162553	4.59296	2.07658	Os05g0588800	Hypothetical gene.
diffreps_peak_183752	7.01104	6.62734	Os06g0651200	Conserved hypothetical protein.
diffreps_peak_190403	16.0414	6.85878	Os07g0154100	Viviparous-14, OsNCED4
diffreps_peak_190402	11.4107	6.85878	Os07g0154100	Viviparous-14.
diffreps_peak_191741	3.15131	7.77369	Os07g0180800	RNA recognition motif domain domain containing protein.
diffreps_peak_191738	2.17778	7.77369	Os07g0180800	RNA recognition motif domain domain containing protein.
diffreps_peak_192277	3.13431	7.46317	Os07g0192000	ATPase AAA-type core domain containing protein.
diffreps_peak_202933	2.7239	5.25212	Os07g0534200	Hypothetical protein.
diffreps_peak_210933	5.48977	6.89607	Os07g0687900	WSI76 protein induced by water stress, OsLEA24
diffreps_peak_210932	4.58187	6.89607	Os07g0687900	WSI76 protein induced by water stress.
diffreps_peak_233698	2.21948	7.41317	Os08g0558100	EF hand domain containing protein.
diffreps_peak_233697	3.20992	7.41317	Os08g0558100	EF hand domain containing protein.
diffreps_peak_243723	3.06464	1.9076	Os09g0400600	Hypothetical protein.
diffreps_peak_244370	2.89701	6.84971	Os09g0415050	Hypothetical gene.
diffreps_peak_244371	2.85274	6.84971	Os09g0415050	Hypothetical gene.
diffreps_peak_244369	6.83529	6.84971	Os09g0415050	Hypothetical gene.
diffreps_peak_246683	3.29248	1.01972	Os09g0464033	Hypothetical gene.
diffreps_peak_247387	2.60362	6.64329	Os09g0478300	Cellulose synthase-like protein E6, OsCSLE6
diffreps_peak_250049	2.54417	-7.05684	Os09g0530750	Hypothetical protein.
diffreps_peak_251204	2.54683	6.91968	Os09g0555500	Chloroplast phytoene synthase 3, OsPSY3
diffreps_peak_252224	3.2741	1.55505	Os09g0572450	Hypothetical protein.
diffreps_peak_265230	3.06425	6.46967	Os10g0492500	Tonoplast membrane integral protein ZmTIP3-1.
diffreps_peak_266039	11.6529	6.61236	Os10g0505900	Conserved hypothetical protein.
diffreps_peak_268481	3.63347	7.14977	Os10g0558600	Pentatricopeptide repeat domain containing protein.
diffreps_peak_269003	4.22081	3.1603	Os10g0565150	Hypothetical gene.
diffreps_peak_274947	4.54821	6.16154	Os11g0209700	Conserved hypothetical protein, OsPI4K1
diffreps_peak_283360	8.45087	7.47726	Os11g0547000	Hypothetical conserved gene,OsFKF1
diffreps_peak_285944	3.24908	-5.7706	Os11g0616900	Hypothetical protein.
diffreps_peak_286615	3.66364	-7.75655	Os11g0642900	Hypothetical protein.
The down-regulated genes with decreased m6A methylation in shoots	m6A FC	Expression logFC	Gene ID	Function Annotation
diffreps_peak_15443	2.01841	7.02916	Os01g0508500	Conserved hypothetical protein, RH2
diffreps_peak_23815	2.00845	6.69099	Os01g0681000	Uncharacterised protein family UPF0089 domain containing protein.
diffreps_peak_40392	2.21345	4.90159	Os01g0975300	Myb factor protein, OsMYB48
diffreps_peak_41140	2.02811	6.69678	Os02g0106600	Zinc finger RING/FYVE/PHD-type domain containing protein.
diffreps_peak_67412	2.14752	-3.09258	Os02g0727400	Hypothetical protein.
diffreps_peak_74353	3.24504	-4.71985	Os03g0107300	Anion transporter Silicon efflux transporter, OsLsi2
diffreps_peak_75986	2.2642	-6.88659	Os03g0129800	Putataive InsB from Escherichia coli. OsMPH1
diffreps_peak_90137	2.58487	6.21915	Os03g0375966	Amino acid permease family protein. OsLAT4
diffreps_peak_96763	2.31086	-5.78073	Os03g0622700	Plastidic phosphate translocator-like protein1.
diffreps_peak_116679	2.27862	-6.75824	Os04g0269900	Conserved hypothetical protein.
diffreps_peak_121830	3.24651	-7.0981	Os04g0411100	Conserved hypothetical protein.
diffreps_peak_125166	4.07107	-6.97305	Os04g0469425	Hypothetical protein.
diffreps_peak_129654	4.30271	-6.71473	Os04g0547800	Conserved hypothetical protein.
diffreps_peak_144044	4.20708	6.55404	Os05g0201300	Hypothetical gene.
diffreps_peak_153718	6.88976	5.39203	Os05g0411150	Hypothetical protein.
diffreps_peak_155099	2.19997	-7.8134	Os05g0443400	Glucan endo-13-beta-glucosidase 7.
diffreps_peak_155836	2.07921	-7.01246	Os05g0458000	Zinc finger DHHC-type domain containing protein.
diffreps_peak_166888	6.85401	6.8069	Os06g0163200	Esterase/lipase/thioesterase domain containing protein, OsPOP11
diffreps_peak_169671	4.70629	-6.00521	Os06g0220701	Hypothetical gene.
diffreps_peak_181999	3.26139	5.75817	Os06g0610800	Aspartic proteinase nepenthesin-1.
diffreps_peak_197085	2.21125	-7.32958	Os07g0406600	DDHD domain containing protein.
diffreps_peak_212450	2.36672	-6.84603	Os08g0114300	D-arabinono-14-lactone oxidase domain containing protein.
diffreps_peak_238821	2.41164	-1.38012	Os09g0276000	Hypothetical protein.
diffreps_peak_239497	26.3061	6.71951	Os09g0292350	Hypothetical protein.
diffreps_peak_241430	2.10436	-6.03083	Os09g0338500	Desaturase/cytochrome b5 protein, OsSLD
diffreps_peak_246846	2.99257	6.2191	Os09g0467400	OsPUP3, purine permease 3
diffreps_peak_268334	4.53545	-1.31464	Os10g0555651	Conserved hypothetical protein.
diffreps_peak_277966	2.89041	-1.01062	Os11g0291475	Hypothetical protein.
diffreps_peak_277964	2.17538	-1.01062	Os11g0291475	Hypothetical protein.
diffreps_peak_288381	2.23195	-4.76792	Os11g0700500	Snapdragon myb protein 305 homolog.
The up-regulated genes with increased m6A methylation in roots	m6A FC	Expression logFC	Gene ID	Function Annotation
diffreps_peak_17751	2.91126	2.82207	Os01g0556650	Hypothetical protein.
diffreps_peak_20092	11.6518	12.4528	Os01g0608000	Hypothetical conserved gene.
diffreps_peak_25967	2.4409	1.72581	Os01g0716450	Hypothetical gene.
diffreps_peak_30363	3.94326	8.40176	Os01g0794400	Thioredoxin domain 2 containing protein.
diffreps_peak_34690	115.3	6.74534	Os01g0868900	predicted protein, OsSub11
diffreps_peak_37337	4.54189	2.64663	Os01g0914200	Hypothetical protein.
diffreps_peak_39119	7.27237	7.26381	Os01g0937012	Hypothetical protein.
diffreps_peak_39850	6.76783	6.50414	Os01g0952800	Conserved hypothetical protein, IRO2, OsbHLH056
diffreps_peak_39848	3.92302	6.50414	Os01g0952800	Conserved hypothetical protein.
diffreps_peak_39849	5.16922	6.50414	Os01g0952800	Conserved hypothetical protein.
diffreps_peak_50930	3.55971	9.62529	Os02g0250600	Late embryogenesis abundant protein, OsLEA15
diffreps_peak_82689	8.92877	6.43452	Os03g0197100	Sugar transporter protein.
diffreps_peak_86514	2.11195	7.2093	Os03g0255500	Phosphoenolpyruvate carboxykinase.
diffreps_peak_89304	3.92022	7.86062	Os03g0300000	glycosyltransferase 5, OsXXT1
diffreps_peak_98707	2.74172	6.85006	Os03g0582800	Conserved hypothetical protein.
diffreps_peak_113928	2.54348	7.35509	Os03g0856700	GA 20-oxidase1, OsGA20ox1
diffreps_peak_127840	105.3	-2.54531	Os04g0454250	Hypothetical protein.
diffreps_peak_128834	4.80517	-7.89345	Os04g0471700	OsWRKY35
diffreps_peak_131071	23.5476	7.52453	Os04g0506300	TMS membrane protein
diffreps_peak_134643	2.031	7.09445	Os04g0569400	methyltransferase
diffreps_peak_136489	2.54702	6.91909	Os04g0605500	P-type ATPase , OsACA6
diffreps_peak_136493	3.49317	6.91909	Os04g0605500	P-type ATPase
diffreps_peak_136501	2.55938	6.91909	Os04g0605500	P-type ATPase
diffreps_peak_141185	2.79389	7.3833	Os04g0674500	Hypothetical protein, OsmiR396d
diffreps_peak_141642	2.31135	1.62561	Os04g0681625	Hypothetical protein.
diffreps_peak_148774	2.91444	-6.50666	Os05g0207400	Zinc finger RING/FYVE/PHD-type domain containing protein.
diffreps_peak_149391	4.08275	10.1836	Os05g0226900	Proline-rich glycoprotein, OsPRP
diffreps_peak_153763	6.67	7.61544	Os05g0319875	Hypothetical protein.
diffreps_peak_155089	2.43249	-7.3128	Os05g0355300	PIT1. OsRFPV-2
diffreps_peak_163331	2.69286	6.89963	Os05g0519700	Heat shock protein 101.OsHSP101
diffreps_peak_163728	3.97416	2.12943	Os05g0524525	Hypothetical protein.
diffreps_peak_163729	4.02055	2.12943	Os05g0524525	Hypothetical protein.
diffreps_peak_163748	8.90196	7.31808	Os05g0524900	Hypothetical protein.
diffreps_peak_163745	10.3725	7.31808	Os05g0524900	Hypothetical protein.
diffreps_peak_163768	5.30145	2.17329	Os05g0525701	Hypothetical protein.
diffreps_peak_164040	3.10977	-7.27796	Os05g0532500	Hypothetical conserved gene.
diffreps_peak_169025	2.73676	-6.66813	Os06g0114366	Pentatricopeptide repeat domain containing protein, OsFBO18
diffreps_peak_177480	3.46565	8.22597	Os06g0283400	Phosphatidylinositol 3- and 4-kinase catalytic domain containing protein.
diffreps_peak_177822	3.07951	6.33809	Os06g0289200	UDP-glucuronosyl/UDP-glucosyltransferase family protein, UGT
diffreps_peak_179846	2.18135	-3.65603	Os06g0340200	Hypothetical conserved gene.
diffreps_peak_187356	7.57143	-6.52635	Os06g0624750	Hypothetical protein.
diffreps_peak_189601	2.77883	-6.69572	Os06g0670100	Conserved hypothetical protein.
diffreps_peak_191756	2.61058	3.60755	Os06g0706850	Glycosyltransferase.
diffreps_peak_194503	78.4	7.02743	Os07g0117400	NB-ARC domain containing protein.
diffreps_peak_207284	2.0662	6.74512	Os07g0520600	Conserved hypothetical protein.
diffreps_peak_211158	3.46496	9.19331	Os07g0599700	Surface protein PspC.
diffreps_peak_218019	3.23813	3.82175	Os08g0118300	Hypothetical protein.
diffreps_peak_236271	2.27814	3.89587	Os08g0531200	WD40 repeat domain containing protein,OsWD40-163
diffreps_peak_244131	2.24283	1.36535	Os09g0313550	Hypothetical gene.
diffreps_peak_249091	4.11333	-6.49509	Os09g0440851	Hypothetical gene.
diffreps_peak_252579	3.08911	-6.90086	Os09g0509400	Hypothetical conserved gene.
diffreps_peak_255936	5.64134	1.64839	Os09g0567600	Hypothetical protein.
diffreps_peak_259092	2.1439	-6.90267	Os10g0171500	Cytochrome P450 family protein expressed.
diffreps_peak_263576	2.82446	-6.94625	Os10g0370500	Glycoside hydrolase catalytic core domain containing protein, GH5BG
diffreps_peak_263769	3.78984	3.23453	Os10g0377000	Conserved hypothetical protein.
diffreps_peak_264806	6.01887	-6.82509	Os10g0405500	Coiled-coil protein, PAIR3
diffreps_peak_265164	87.7	-6.55947	Os10g0413400	Glycerol-3-phosphate acyltransferase 6
diffreps_peak_268819	4.42218	7.49391	Os10g0492500	Tonoplast membrane integral protein ZmTIP3-1.
diffreps_peak_280519	7.44901	8.22038	Os11g0249700	Hypothetical protein.
diffreps_peak_289849	5.89404	8.91417	Os11g0640500	Protein of unknown function DUF594 domain containing protein.
diffreps_peak_292481	2.25687	4.66717	Os12g0104400	Fatty acid desaturase, OsFAD3
diffreps_peak_310221	3.84465	6.90353	Os12g0612500	Methyltransferase small domain containing protein.
The down-regulated genes with decreased m6A methylation in roots	m6A FC	Expression logFC	Gene ID	Function Annotation
diffreps_peak_1785	2.44435	7.95984	Os01g0127300	SufBD family protein, OsNAP6
diffreps_peak_10914	2.40492	-6.92362	Os01g0297200	ATPaseAAA-typecore domain containing protein，OsAAA-ATPase1
diffreps_peak_11465	2.04348	-7.10051	Os01g0310500	OsWAK3, OsRLCK31
diffreps_peak_12579	2.09446	7.94441	Os01g0339500	No apical meristem protein, ONAC30
diffreps_peak_33591	2.64779	6.36923	Os01g0851000	Carbohydrate/purine kinase domain containing protein, OsFLN1
diffreps_peak_48464	2.17731	-6.52065	Os02g0199200	NB-ARC domain containing disease resistance protein
diffreps_peak_57765	3.17892	-1.68306	Os02g0514326	Hypothetical protein.
diffreps_peak_69997	3.26967	-7.04342	Os02g0739000	predicted protein.
diffreps_peak_74940	2.52111	-1.85668	Os02g0817900	Cytochrome P450 family protein, OsCYP97A4
diffreps_peak_74939	2.28634	-1.85668	Os02g0817900	Cytochrome P450 family protein.
diffreps_peak_74937	3.8746	-1.85668	Os02g0817900	Cytochrome P450 family protein.
diffreps_peak_83375	2.14855	-1.54395	Os03g0206750	Hypothetical protein.
diffreps_peak_84804	2.28238	-6.94556	Os03g0225700	Wall-associated kinase, OsWAK25
diffreps_peak_84805	2.9392	-6.94556	Os03g0225700	Wall-associated kinaseBiotic stress response
diffreps_peak_84937	3.02454	-1.68287	Os03g0227601	Hypothetical gene.
diffreps_peak_91145	2.7016	-2.93358	Os03g0332566	Hypothetical gene.
diffreps_peak_98768	2.41954	-2.62836	Os03g0583900	OsDCL2
diffreps_peak_109396	2.55971	9.7342	Os03g0786100	Glycolate oxidase, OsGLO1
diffreps_peak_114147	6.52525	7.33268	Os03g0860900	WD40 repeat-like domain containing protein, OsTHI30
diffreps_peak_135137	3.06608	-7.37688	Os04g0581600	UDP-glucose dehydrogenase.
diffreps_peak_135271	77.9	-7.33276	Os04g0583900	LHY protein, OsMYBR1
diffreps_peak_139076	3.04738	-2.06993	Os04g0640600	shikimate kinase, OsSK3
diffreps_peak_141451	3.84951	-5.98933	Os04g0678700	Protochlorophyllide reductase, OsPORA
diffreps_peak_142174	11.089	-7.57588	Os04g0688600	Peroxidase, OsPRX63
diffreps_peak_149094	11.7969	-5.21443	Os05g0215033	Hypothetical gene.
diffreps_peak_158830	3.73917	-9.00559	Os05g0428100	Beta-galactosidase.
diffreps_peak_158826	3.18348	-9.00559	Os05g0428100	Beta-galactosidase.
diffreps_peak_158827	3.30108	-9.00559	Os05g0428100	Beta-galactosidase, OsBgal6
diffreps_peak_158835	7.83766	-9.00559	Os05g0428100	Beta-galactosidase 7, OsBgal6
diffreps_peak_163700	2.1466	7.00491	Os05g0524300	Mitochondrial processing peptidase.
diffreps_peak_169435	2.87392	-4.52184	Os06g0125500	Glutathione transporter, OsGT1
diffreps_peak_169436	2.61208	-4.52184	Os06g0125500	oligopeptide transporter, OsOPT3
diffreps_peak_176072	3.99259	8.54676	Os06g0250600	K+ translocation toward the shoots, OsGORK
diffreps_peak_176780	76.8	7.85539	Os06g0267400	cytochrome P450 71A6
diffreps_peak_178183	2.7768	-6.76677	Os06g0298400	WW/Rsp5/WWP domain containing protein.
diffreps_peak_179442	3.67903	-6.56282	Os06g0329900	SAM dependent carboxyl methyltransferase family protein.
diffreps_peak_185903	2.00338	-6.29673	Os06g0597400	PINHEAD/ZWILLE (PNH/ZLL) homologous protein, OsPNH1
diffreps_peak_199385	2.74952	-6.90613	Os07g0232900	Heavy metal-transporting P1B-ATPase, OsHMA3
diffreps_peak_199386	2.32784	-6.90613	Os07g0232900	Heavy metal-transporting P1B-ATPase
diffreps_peak_202910	3.31184	-1.61912	Os07g0421932	Hypothetical gene.
diffreps_peak_202909	3.16921	-1.61912	Os07g0421932	Hypothetical gene.
diffreps_peak_203738	2.08991	-7.86113	Os07g0448100	Plasma membrane integral protein ZmPIP2-6, OsPIP2-4
diffreps_peak_217677	2.21298	-7.87009	Os08g0112900	Lipase, GDSL domain containing protein, OsGELP95
diffreps_peak_232664	3.10393	-7.49799	Os08g0465700	Cytochrome P450 family protein, CYP76M1
diffreps_peak_232694	3.24571	-7.14315	Os08g0466200	KUP-related potassium transporter, OsHAK4
diffreps_peak_236281	2.52973	3.89587	Os08g0531200	WD40 repeat domain containing protein.
diffreps_peak_237523	2.79858	-7.73451	Os08g0549200	Beta-galactosidase, OsBGal10
diffreps_peak_237684	3.0113	-6.3664	Os08g0553700	Protein of unknown function DUF241plant family protein.
diffreps_peak_250474	3.05302	-7.38525	Os09g0470900	predicted protein.
diffreps_peak_253429	4.59944	-7.20013	Os09g0524001	Hypothetical gene.
diffreps_peak_255714	3.06401	-7.70161	Os09g0564200	Hypothetical conserved gene.
diffreps_peak_255712	2.49567	-7.70161	Os09g0564200	Hypothetical conserved gene.
diffreps_peak_257393	2.14752	-2.68734	Os10g0130900	Hypothetical protein.
diffreps_peak_257394	2.68091	-2.68734	Os10g0130900	Hypothetical protein.
diffreps_peak_263801	2.46029	7.16442	Os10g0378100	Cytochrome P450 family proteinexpressed.
diffreps_peak_269334	94.5	6.99026	Os10g0499800	Conserved hypothetical protein.
diffreps_peak_272190	2.61987	7.38428	Os10g0558900	2OG-Fe (II) oxygenase family protein, Os2ODD24, RL14
diffreps_peak_275833	4.09205	-7.40482	Os11g0134100	LG27/30-like.
diffreps_peak_276531	2.25759	6.0312	Os11g0147800	Wali7 protein (Fragment).
diffreps_peak_277236	12.7105	-7.62628	Os11g0160550	GRAS family transcription factor containing protein, OsGRAS45
diffreps_peak_280833	2.42032	-8.13825	Os11g0264300	RWP-RK domain containing protein, OsNLP5
diffreps_peak_297830	5.38617	-7.62596	Os12g0218500	Hypothetical conserved gene.
